# Supplementary material for: Rh-catalyzed asymmetric hydrogenation of allylic sulfones for synthesis of chiral β-ester sulfones
Source: Royal Society of Chemistry journal article supplement (doi:10.1039/d4qo00361f), 2024-01-01
Supplement: d4qo00361f1.pdf [file d4qo00361f1.pdf]

## Supporting Information

### **Rh-Catalyzed Asymmetric Hydrogenation of Allylic Sulfones for Synthesis of Chiral $\beta$ -Ester Sulfones**

Xiaoxue Wu,<sup>a</sup> Qianling Guo,<sup>a</sup> Guofu Zi,<sup>a</sup> Yuping Huang,<sup>\*b</sup> and Guohua Hou<sup>\*a</sup>

[a]Key Laboratory of Radiopharmaceuticals, College of Chemistry, Beijing Normal University, Beijing 100875, China

[b]Research Institute of Petroleum Processing, SINOPEC, Beijing 100083, China

\*E-mails: Guohua Hou: ghhou@bnu.edu.cn; Yuping Huang: huangyuping.ripp@sinopec.com.

#### **Contents:**

|                                                                                                                                             |      |
|---------------------------------------------------------------------------------------------------------------------------------------------|------|
| 1. Experimental Section.....                                                                                                                | S2   |
| 2. General procedure for the synthesis of substrates <b>1</b> , <b>3</b> and compounds <b>4i'</b> and <b>4j'</b> .....                      | S2   |
| 3. The characterization data for substrates <b>1</b> and <b>3</b> .....                                                                     | S5   |
| 4. General procedure for asymmetric hydrogenation of compound <b>1</b> and <b>3</b> .....                                                   | S15  |
| 5. NMR, HPLC or SFC and HPLC, optical rotation and HRMS data of compounds <b>2</b> , <b>4</b> and compounds <b>4i'</b> and <b>4j'</b> ..... | S17  |
| 6. References.....                                                                                                                          | S32  |
| 7. NMR, SFC and HPLC spectra.....                                                                                                           | S34  |
| 8. X-ray crystallographic analysis of compound <b>2i</b> .....                                                                              | S135 |

## 1. Experimental Section

**General Information:** All the air or moisture sensitive reactions and manipulations were performed by using standard Schlenk techniques and in a nitrogen-filled glovebox. THF, dioxane and toluene were distilled from sodium benzophenone ketyl. DCM and DCE was distilled from calcium hydride. Anhydrous MeOH was distilled from magnesium.  $^1\text{H}$  NMR and  $^{13}\text{C}$  NMR spectra were recorded on Bruker AV (400 MHz) spectrometers and JEOL JNM-ECX600P and JNM-ECS600 (400 MHz or 600 MHz) spectrometers. ( $\text{CDCl}_3$  was the solvent used for the NMR analysis, with TMS as the internal standard). Optical rotation was determined using Autopol III Automatic polarimeter (Rudolph research Analytical). HPLC analysis was conducted on Agilent 1260 series instrument. SFC analysis was conducted on Agilent 1260 series instrument. HRMS were recorded on a Waters LCT Premier XE mass spectrometer with TOF.

## 2. General procedure for the synthesis of substrates 1 and 3

### General Procedure 1 and 3<sup>[1-5]</sup>

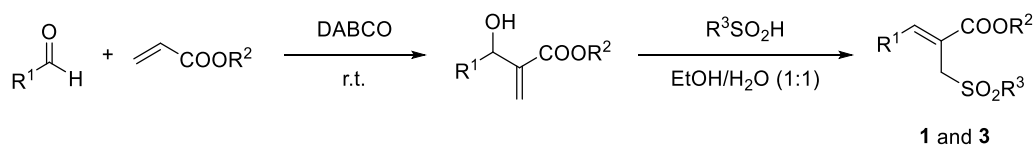

Take the aldehydes (5.0 mmol), methyl acrylates (2.5 equiv.) and DABCO (1.0 equiv) in a 25 mL oven dried round bottom flask and seal with a rubber septum. Stir the resultant reaction mixture at room temperature under solvent free condition for 7-14 hours. Monitor the progress of the reaction was monitored by TLC. Admix the reaction mixture with ethyl acetate (50 mL). Wash the mixture successively with saturated solution of sodium bicarbonate (2 x 25 mL) and brine solution (2 x 25 mL). Dry the organic layer over anhydrous sodium sulfate and concentrated in vacuo. The residue was purified by flash column chromatography to (PE:EA = 5:1) yield the Morita-Baylis-Hillman alcohols.

Dissolve phenyl- or methyl-substituted sulfinic acid (1.5 equiv) and Morita-Baylis-Hillman alcohols (1.0 equiv) in aqueous media 10.0 mL (ethanol/deionized water, V/V = 1/1). Stir the reaction mixture vigorously for 48 hours at 30 °C. After complete

conversion, precipitate the product from the solvent. Extract the aqueous media with ethyl acetate (3 x 30 mL). Dry the combined organic layers over Na<sub>2</sub>SO<sub>4</sub>. Concentrate the combined organic layers by rotary evaporation. Purify the crude product via column chromatography (PE:EA = 3:1) to afford the corresponding allyl sulfones **1** and **3**.

**General Procedure 3e, 3f, 3i, 3j and 3k**<sup>[6-9]</sup>

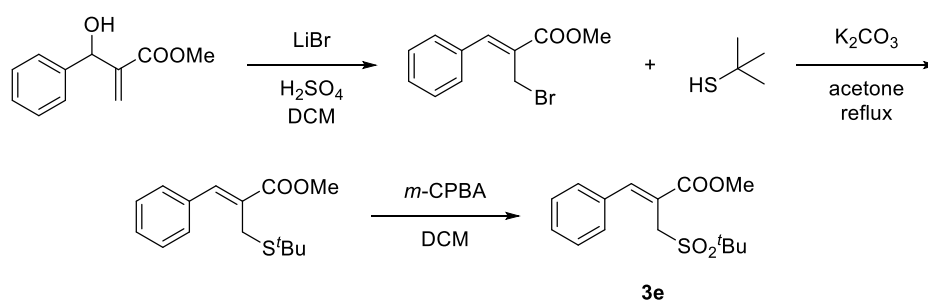

Morita-Baylis-Hillman alcohols (1.0 equiv), LiBr (3.0 equiv) and H<sub>2</sub>SO<sub>4</sub> (1.5 equiv) were stirred in dichloromethane for 16 hours. Na<sub>2</sub>CO<sub>3</sub> (aq. sat.) was added and the mixture was extracted with DCM. The combined organic layers were dried over MgSO<sub>4</sub>. Concentrate the combined organic layers by rotary evaporation. Purify the crude product via column chromatography (PE:EA = 20:1) to afford the corresponding allylic bromide.

To a solution of allylic bromide (1.0 equiv), *tert*-butyl mercaptan (2.0 equiv) and K<sub>2</sub>CO<sub>3</sub> (2.0 equiv) in acetone were stirred by reflux for 3 hours. Monitor the progress of the reaction was monitored by TLC. NH<sub>4</sub>Cl (aq. sat.) was added and the mixture was extracted with DCM. The combined organic layers were dried over MgSO<sub>4</sub> and the volatiles were removed under reduced pressure. Purify the crude product via column chromatography (PE:EA = 20:1) to afford the corresponding allylic sulfide.

85% *m*-CPBA (3.0 equiv.) is added to a solution of allylic sulfide (1.0 mmol) in CH<sub>2</sub>Cl<sub>2</sub> (15 mL), and the reaction is left under magnetic stirring at 20 °C for 18 hours. The solution is diluted with water (10 mL) and extracted with a 10% w/v solution of NaHCO<sub>3</sub> (3 x 20 mL) and NaCl saturated solution (20 mL), dried Na<sub>2</sub>SO<sub>4</sub> and the volatiles were removed under reduced pressure. Purify the crude product via column chromatography (PE:EA = 3:1) to afford the corresponding vinylic sulfone **3e**.

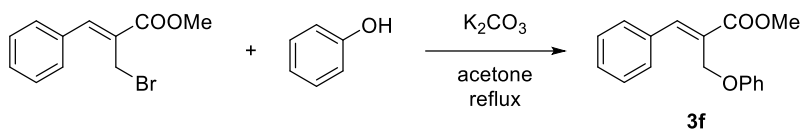

To a solution of allylic bromide (1.0 equiv), phenol (2.0 equiv) and  $\text{K}_2\text{CO}_3$  (2.0 equiv) in acetone were stirred by reflux for 3 hours. Monitor the progress of the reaction was monitored by TLC.  $\text{NH}_4\text{Cl}$  (aq. sat.) was added and the mixture was extracted with DCM. The combined organic layers were dried over  $\text{MgSO}_4$  and the volatiles were removed under reduced pressure. Purify the crude product via column chromatography (PE:EA = 20:1) to afford the corresponding allyl phenyl ether **3f**.

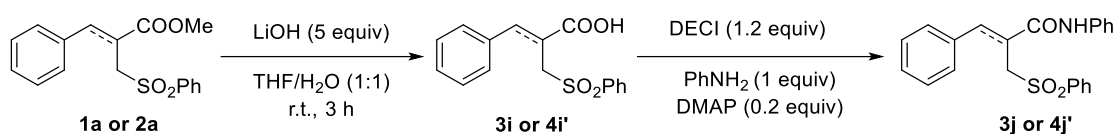

Methyl (Z)-3-phenyl-2-((phenylsulfonyl)methyl)acrylate **1a** (3.0 mmol, 1.0 equiv) was dissolved in a mixture of 6 ml of tetrahydrofuran and 6 ml of water, and mixed with LiOH (5.0 equiv). The mixture was then stirred at 80°C. After 3 hours, the reaction mixture was acidified by adding one molar hydrochloric acid solution and extracted with EA (3 × 20 mL). The combined organic phases were dried over  $\text{MgSO}_4$  and subsequently the solvent was removed in vacuum to obtain the acid as a white solid.

Treat dropwise a solution of acid (1.0 equiv) in  $\text{CH}_2\text{Cl}_2$  with EDCI (1.2 equiv) and DMAP (0.2 equiv) at 0 °C. Stir the resulting mixture at this temperature for 4 hours. Concentrate the reaction mixture in vacuo. Dissolve the residue in  $\text{CH}_2\text{Cl}_2$ . Separate the layers and extract the aqueous phase with  $\text{CH}_2\text{Cl}_2$  (3 x 30 mL). Dry the combined organics over  $\text{MgSO}_4$  and concentrate in vacuo. Purify the crude product via column chromatography (PE:EA = 3:1) to afford the corresponding sulfone **3j** or **4j'**.

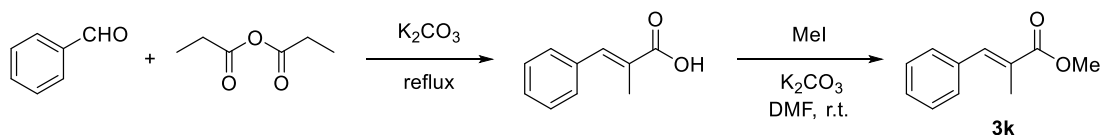

Add appropriate anhydride (30.0 mmol, 1.6 equiv) to potassium carbonate (22.4 mmol, 1.2 equiv) at 0 °C. Add appropriate aromatic aldehyde (18.6 mmol, 1.0 equiv) after stirring for 5 min to mix up. Heat the mixture to reflux for 12 h. Add water and solid



Na<sub>2</sub>CO<sub>3</sub> (3.0 g) to the above reaction mixture after cooling with an ice bath. Acidify the reaction mixture to pH 6.0 using concentrated HCl to obtain 2-methyl-3-phenylacrylic acid after filter the resultant yellow precipitate.

To a dried 50 mL flask, cinnamic acid (5.0 mmol, 1.0 equiv) was added to a stirred suspension of potassium carbonate (10.0 mmol, 2.0 equiv) in 15 mL DMF at room temperature. After 10 min, CH<sub>3</sub>I (7.5 mmol, 1.5 equiv) was added slowly at ambient temperature while stirring, the reaction was stirred at room temperature under TLC analysis. After 5 h, water (20 mL) was added, and aqueous layer was extracted with ethyl acetate (3 × 50 mL). The combined organic layers were sequentially washed with 4 N hydrochloric acid and brine, dried over anhydrous MgSO<sub>4</sub> and concentrated in vacuo. The residue was purified by chromatography on silica gel (PE:EA = 10:1) to afford the desired product **3k**.

### 3. The characterization data for substrates **1** and **3**

Methyl (Z)-3-phenyl-2-((phenylsulfonyl)methyl)acrylate (**1a**)

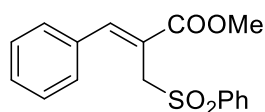

Purification by column chromatography (silica gel, PE:EA = 3:1, 5 x 22 cm) and recrystallization afforded the product as white solid; 1.23 g, yield: 78% (two steps); m.p. 64-66 °C. <sup>1</sup>H NMR

(600 MHz, Chloroform-*d*) δ 7.95 (s, 1H), 7.87 – 7.85 (m, 2H), 7.63 – 7.60 (m, 1H), 7.51 – 7.47 (m, 4H), 7.39 – 7.37 (m, 3H), 4.49 (s, 2H), 3.59 (s, 3H). The analytical data are consistent with the literature.<sup>5</sup>

Methyl (Z)-2-((phenylsulfonyl)methyl)-3-(*p*-tolyl)acrylate (**1b**)

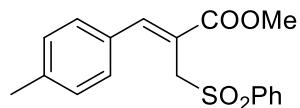

Purification by column chromatography (silica gel, PE:EA = 3:1, 5 x 22 cm) and recrystallization afforded the product as

white solid; 1.17g, yield: 71% (two steps); m.p. 96-98 °C. <sup>1</sup>H NMR (600 MHz, Chloroform-*d*) δ 7.93 (s, 1H), 7.88 – 7.86 (m, 2H), 7.63 – 7.60 (m, 1H), 7.52 – 7.49 (m, 2H), 7.43 (d, *J* = 8.0 Hz, 2H), 7.19 (d, *J* = 7.9 Hz, 2H), 4.50 (s, 2H), 3.56 (s, 3H), 2.38 (s, 3H). <sup>13</sup>C NMR (151 MHz, Chloroform-*d*) δ 167.0, 146.6, 140.3, 139.5, 133.7, 130.8, 129.5, 129.5, 129.0, 128.6, 119.8, 55.3, 52.3, 21.4. The analytical data are consistent with the literature.<sup>10</sup>

Methyl (Z)-3-(4-methoxyphenyl)-2-((phenylsulfonyl)methyl)acrylate (**1c**)

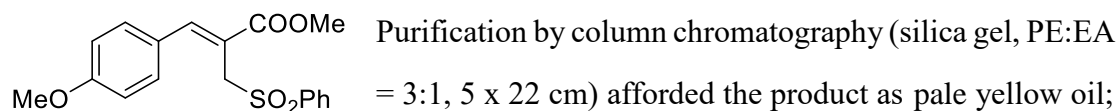

1.20 g, yield: 0.69 g (two steps). <sup>1</sup>H NMR (600 MHz, Chloroform-*d*) δ 7.93 – 7.88 (m, 3H), 7.63 – 7.57 (m, 3H), 7.53 – 7.50 (m, 2H), 6.94 – 6.91 (m, 2H), 4.50 (s, 2H), 3.84 (s, 3H), 3.51 (s, 3H). <sup>13</sup>C NMR (151 MHz, Chloroform-*d*) δ 167.3, 161.2, 146.4, 139.7, 133.8, 131.7, 129.1, 128.7, 126.3, 118.2, 114.4, 55.6, 55.5, 52.3. The analytical data are consistent with the literature.<sup>10</sup>

Methyl (Z)-3-(4-(benzyloxy)phenyl)-2-((phenylsulfonyl)methyl)acrylate (**1d**)

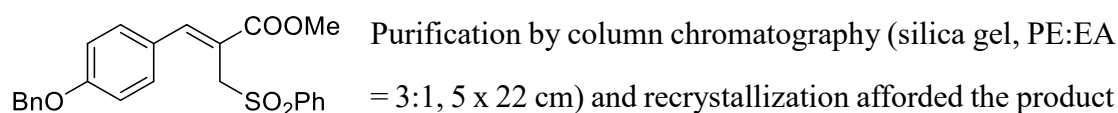

as white solid; 1.27 g, yield: 60% (two steps); m.p. 104-105 °C. <sup>1</sup>H NMR (600 MHz, Chloroform-*d*) δ 7.91 (s, 1H), 7.89 – 7.87 (m, 2H), 7.61 – 7.56 (m, 3H), 7.51 – 7.48 (m, 2H), 7.45 – 7.43 (m, 2H), 7.42 – 7.40 (m, 2H), 7.37 – 7.34 (m, 1H), 7.01 – 6.98 (m, 2H), 5.11 (s, 2H), 4.52 (s, 2H), 3.52 (s, 3H). <sup>13</sup>C NMR (151 MHz, Chloroform-*d*) δ 167.1, 160.2, 146.2, 139.5, 136.4, 133.7, 131.6, 129.0, 128.7, 128.6, 128.2, 127.4, 126.4, 118.2, 115.2, 70.0, 55.4, 52.2. TOF-HRMS Calcd. for C<sub>24</sub>H<sub>23</sub>O<sub>5</sub>S [M+H<sup>+</sup>]: 423.1261, found 423.1257.

(Z)-4-(3-methoxy-3-oxo-2-((phenylsulfonyl)methyl)prop-1-en-1-yl)phenyl benzoate (**1e**)

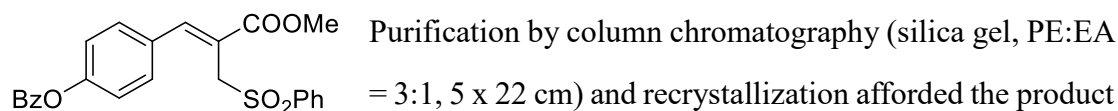

as white solid; 1.18 g, yield: 54% (two steps); m.p. 136-138 °C. <sup>1</sup>H NMR (600 MHz, Chloroform-*d*) δ 8.22 – 8.21 (m, 2H), 7.96 (s, 1H), 7.88 – 7.87 (m, 2H), 7.68 – 7.62 (m, 2H), 7.60 – 7.58 (m, 2H), 7.55 – 7.52 (m, 4H), 7.27 – 7.24 (m, 2H), 4.51 (s, 2H), 3.61 (s, 3H). <sup>13</sup>C NMR (151 MHz, Chloroform-*d*) δ 166.8, 164.8, 152.0, 145.4, 139.2, 133.8, 131.3, 130.6, 130.2, 129.2, 129.1, 128.7, 128.5, 122.2, 121.0, 55.1, 52.4. TOF-HRMS Calcd. for C<sub>24</sub>H<sub>21</sub>O<sub>6</sub>S [M+H<sup>+</sup>]: 437.1053, found 437.1052.

(Z)-4-(3-methoxy-3-oxo-2-((phenylsulfonyl)methyl)prop-1-en-1-yl)phenyl 4-

methoxybenzoate (**1f**)

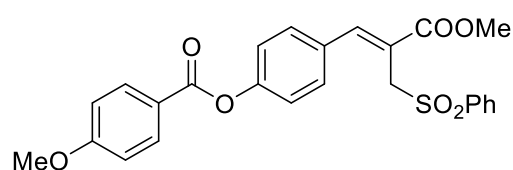

Purification by column chromatography (silica gel, PE:EA = 3:1, 5 x 22 cm) and recrystallization afforded the product as white solid; 1.45 g, yield: 62% (two steps); m.p. 123-124 °C. <sup>1</sup>H NMR (600 MHz, Chloroform-*d*) δ 8.22 – 8.21 (m, 2H), 7.96 (s, 1H), 7.88 – 7.87 (m, 2H), 7.68 – 7.62 (m, 2H), 7.60 – 7.58 (m, 2H), 7.55 – 7.52 (m, 4H), 7.26 – 7.24 (m, 2H), 4.51 (s, 2H), 3.61 (s, 3H). <sup>13</sup>C NMR (151 MHz, Chloroform-*d*) δ 166.8, 164.8, 152.0, 145.4, 139.2, 133.8, 131.3, 130.6, 130.2, 129.2, 129.1, 128.7, 128.5, 122.2, 121.0, 55.1, 52.4. TOF-HRMS Calcd. for C<sub>25</sub>H<sub>23</sub>O<sub>7</sub>S [M+H<sup>+</sup>]: 467.1159, found 467.1157.

Methyl (Z)-3-(4-(((benzyloxy)carbonyl)oxy)phenyl)-2-((phenylsulfonyl)methyl)acrylate (**1g**)

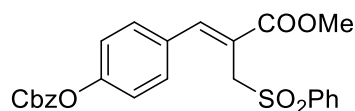

Purification by column chromatography (silica gel, PE:EA = 3:1, 5 x 22 cm) and recrystallization afforded the product as white solid; 1.33 g, yield: 57% (two steps); m.p. 112-113 °C. <sup>1</sup>H NMR (400 MHz, Chloroform-*d*) δ 7.92 (s, 1H), 7.87 – 7.84 (m, 2H), 7.68 – 7.58 (m, 1H), 7.55 – 7.48 (m, 4H), 7.47 – 7.36 (m, 5H), 7.23 – 7.19 (m, 2H), 5.29 (s, 2H), 4.47 (s, 2H), 3.60 (s, 3H). <sup>13</sup>C NMR (151 MHz, Chloroform-*d*) δ 166.7, 153.2, 152.0, 145.1, 139.2, 134.5, 133.8, 131.4, 130.6, 129.1, 128.9, 128.7, 128.6, 128.5, 121.5, 121.2, 70.6, 55.0, 52.4. TOF-HRMS Calcd. for C<sub>25</sub>H<sub>23</sub>O<sub>7</sub>S [M+H<sup>+</sup>]: 467.1159, found 467.1156.

Methyl (Z)-3-(4-hydroxyphenyl)-2-((phenylsulfonyl)methyl)acrylate (**1h**)

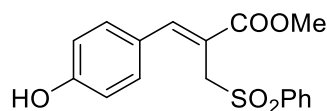

Purification by column chromatography (silica gel, PE:EA = 3:1, 5 x 22 cm) and recrystallization afforded the product as white solid; 1.25 g, yield: 75% (two steps); m.p. 74-75 °C. <sup>1</sup>H NMR (600 MHz, Chloroform-*d*) δ 7.92 (s, 1H), 7.90 – 7.88 (m, 2H), 7.64 – 7.62 (m, 1H), 7.54 – 7.51 (m, 4H), 6.87 (d, *J* = 8.6 Hz, 2H), 5.47 (br s, 1H), 4.55 (s, 2H), 3.51 (s, 3H). <sup>13</sup>C NMR (151 MHz, Chloroform-*d*) δ 167.3, 158.0, 146.8, 139.2, 133.9, 131.9, 129.1, 128.6, 125.9, 117.4, 115.9, 55.5, 52.3. TOF-HRMS Calcd. for C<sub>17</sub>H<sub>17</sub>O<sub>5</sub>S [M+H<sup>+</sup>]: 333.0791, found 333.0791.

Methyl (Z)-3-(4-bromophenyl)-2-((phenylsulfonyl)methyl)acrylate (**1i**)

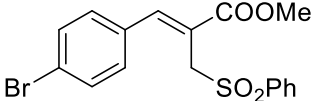 Purification by column chromatography (silica gel, PE:EA = 3:1, 5 x 22 cm) and recrystallization afforded the product as white solid; 1.72 g, yield: 87% (two steps); m.p. 96-98 °C. <sup>1</sup>H NMR (600 MHz, Chloroform-*d*) δ 7.87 (s, 1H), 7.86 – 7.85 (m, 2H), 7.65 – 7.62 (m, 1H), 7.53 – 7.50 (m, 4H), 7.40 – 7.38 (m, 2H), 4.43 (s, 2H), 3.58 (s, 3H). <sup>13</sup>C NMR (151 MHz, Chloroform-*d*) δ 166.6, 145.1, 139.3, 133.9, 132.5, 132.0, 130.7, 129.1, 128.5, 124.3, 121.5, 55.1, 52.5. The analytical data are consistent with the literature.<sup>5</sup>

Methyl (Z)-3-(4-nitrophenyl)-2-((phenylsulfonyl)methyl)acrylate (**1j**)

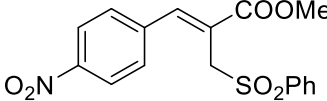 Purification by column chromatography (silica gel, PE:EA = 3:1, 5 x 22 cm) and recrystallization afforded the product as white solid; 1.25 g, yield: 69% (two steps); m.p. 154-156 °C. <sup>1</sup>H NMR (600 MHz, Chloroform-*d*) δ 8.25 – 8.23 (m, 2H), 7.98 (s, 1H), 7.87 – 7.85 (m, 2H), 7.68 – 7.64 (m, 3H), 7.55 – 7.52 (m, 2H), 4.40 (s, 2H), 3.63 (s, 3H). <sup>13</sup>C NMR (151 MHz, Chloroform-*d*) δ 166.0, 148.1, 143.5, 140.0, 139.1, 134.1, 129.9, 129.2, 128.5, 124.2, 123.9, 54.9, 52.7. The analytical data are consistent with the literature.<sup>11</sup>

Methyl (Z)-2-((phenylsulfonyl)methyl)-3-(*m*-tolyl)acrylate (**1k**)

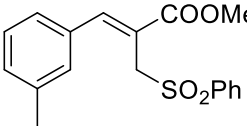 Purification by column chromatography (silica gel, PE:EA = 3:1, 5 x 22 cm) and recrystallization afforded the product as white solid; 1.04 g, yield: 63% (two steps); m.p. 74-76 °C. <sup>1</sup>H NMR (600 MHz, Chloroform-*d*) δ 7.90 (s, 1H), 7.84 (d, *J* = 8.0 Hz, 2H), 7.60 (t, *J* = 7.4 Hz, 1H), 7.48 (t, *J* = 7.7 Hz, 2H), 7.28 – 7.23 (m, 2H), 7.19 (s, 1H), 7.16 (d, *J* = 7.4 Hz, 1H), 4.49 (s, 2H), 3.60 (s, 3H), 2.34 (s, 3H). <sup>13</sup>C NMR (151 MHz, Chloroform-*d*) δ 166.9, 146.5, 139.3, 138.4, 133.6, 133.6, 130.4, 129.8, 128.9, 128.6, 128.5, 126.1, 120.7, 55.1, 52.3, 21.3. The analytical data are consistent with the literature.<sup>10</sup>

Methyl (Z)-3-(3-methoxyphenyl)-2-((phenylsulfonyl)methyl)acrylate (**1l**)

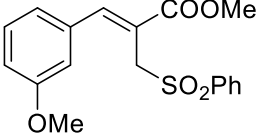 Purification by column chromatography (silica gel, PE:EA = 3:1, 5 x 22 cm) and recrystallization afforded the product as white solid; 1.37 g, yield: 79% (two steps); m.p. 60-70 °C. <sup>1</sup>H NMR

(600 MHz, Chloroform-*d*)  $\delta$  7.93 (s, 1H), 7.87 – 7.85 (m, 2H), 7.61 (tt,  $J$  = 7.0, 1.2 Hz, 1H), 7.52 – 7.49 (m, 2H), 7.29 (t,  $J$  = 8.0 Hz, 1H), 7.14 (t,  $J$  = 2.1 Hz, 1H), 7.04 – 7.02 (m, 1H), 6.93 (ddd,  $J$  = 8.3, 2.6, 0.9 Hz, 1H), 4.50 (s, 2H), 3.85 (s, 3H), 3.59 (s, 3H).  $^{13}\text{C}$  NMR (151 MHz, Chloroform-*d*)  $\delta$  166.8, 159.8, 146.4, 139.4, 134.9, 133.7, 129.8, 129.0, 128.5, 121.6, 121.1, 116.1, 113.9, 55.5, 55.3, 52.4. The analytical data are consistent with the literature.<sup>10</sup>

**Methyl (Z)-3-(3-fluorophenyl)-2-((phenylsulfonyl)methyl)acrylate (**1m**)**

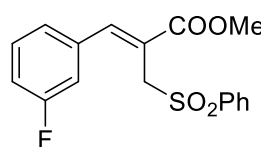

Purification by column chromatography (silica gel, PE:EA = 3:1, 5 x 22 cm) and recrystallization afforded the product as white solid; 1.35 g, yield: 81% (two steps); m.p. 96-98 °C.  $^1\text{H}$  NMR (600 MHz, Chloroform-*d*)  $\delta$  7.88 (s, 1H), 7.84 (d,  $J$  = 7.7 Hz, 2H), 7.63 – 7.61 (m, 1H), 7.50 (t,  $J$  = 7.7 Hz, 2H), 7.34 (td,  $J$  = 7.9, 5.8 Hz, 1H), 7.26 – 7.25 (m, 1H), 7.11 (dt,  $J$  = 9.7, 2.1 Hz, 1H), 7.06 (td,  $J$  = 8.4, 2.6 Hz, 1H), 4.45 (s, 2H), 3.62 (s, 3H).  $^{13}\text{C}$  NMR (151 MHz, Chloroform-*d*)  $\delta$  166.5, 162.7 (d,  $J$  = 247.6 Hz), 144.7, 139.1, 135.7 (d,  $J$  = 7.7 Hz), 133.8, 130.4 (d,  $J$  = 8.4 Hz), 128.8 (d,  $J$  = 86.5 Hz), 124.7 (d,  $J$  = 3.1 Hz), 122.3, 116.5 (d,  $J$  = 21.1 Hz), 115.8 (d,  $J$  = 22.5 Hz), 54.9, 52.5. TOF-HRMS Calcd. for  $\text{C}_{17}\text{H}_{16}\text{FO}_4\text{S}$  [ $\text{M}+\text{H}^+$ ]: 335.0748, found 335.0740.

**Methyl (Z)-3-(3-bromophenyl)-2-((phenylsulfonyl)methyl)acrylate (**1n**)**

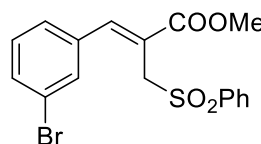

Purification by column chromatography (silica gel, PE:EA = 3:1, 5 x 22 cm) and recrystallization afforded the product as white solid; 1.48 g, yield: 71% (two steps); m.p. 84-85 °C.  $^1\text{H}$  NMR (600 MHz, Chloroform-*d*)  $\delta$  7.84 – 7.82 (m, 3H), 7.65 – 7.62 (m, 1H), 7.51 – 7.47 (m, 3H), 7.45 (d,  $J$  = 1.8 Hz, 1H), 7.42 – 7.40 (m, 1H), 7.24 (t,  $J$  = 7.9 Hz, 1H), 4.44 (s, 2H), 3.66 (s, 3H).  $^{13}\text{C}$  NMR (151 MHz, Chloroform-*d*)  $\delta$  166.5, 144.4, 138.9, 135.6, 133.9, 132.5, 131.7, 130.3, 129.1, 128.5, 127.3, 122.8, 122.5, 54.8, 52.6. The analytical data are consistent with the literature.<sup>10</sup>

**Methyl (Z)-3-(2-fluorophenyl)-2-((phenylsulfonyl)methyl)acrylate (**1o**)**

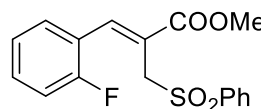

Purification by column chromatography (silica gel, PE:EA = 3:1, 5 x 22 cm) and recrystallization afforded the product as white

solid; 1.12 g, yield: 67% (two steps); m.p. 134-136 °C. <sup>1</sup>H NMR (400 MHz, Chloroform-*d*) δ 7.98 – 7.95 (m, 1H), 7.82 – 7.80 (m, 2H), 7.66 – 7.58 (m, 2H), 7.50 – 7.46 (m, 2H), 7.38 – 7.32 (m, 1H), 7.16 (td, *J* = 7.5, 1.2 Hz, 1H), 7.06 – 7.01 (m, 1H), 4.45 (s, 2H), 3.63 (s, 3H). <sup>13</sup>C NMR (101 MHz, Chloroform-*d*) δ 166.3, 160.1 (d, *J* = 250.8 Hz), 139.0 (d, *J* = 7.5 Hz), 133.8, 131.5 (d, *J* = 8.3 Hz), 130.0, 129.0, 128.5, 124.5 (d, *J* = 3.7 Hz), 123.1, 121.7 (d, *J* = 13.2 Hz), 115.7 (d, *J* = 21.3 Hz), 55.1, 52.5. TOF-HRMS Calcd. for C<sub>17</sub>H<sub>16</sub>FO<sub>4</sub>S [M+H<sup>+</sup>]: 335.0748, found 335.0747.

Methyl (Z)-3-(2-bromophenyl)-2-((phenylsulfonyl)methyl)acrylate (**1p**)

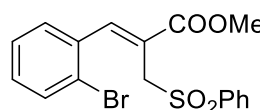

Purification by column chromatography (silica gel, PE:EA = 3:1, 5 x 22 cm) and recrystallization afforded the product as white solid; 1.64 g, yield: 83% (two steps); m.p. 98-99 °C. <sup>1</sup>H NMR (600 MHz, Chloroform-*d*) δ 7.96 (s, 1H), 7.85 – 7.83 (m, 2H), 7.63 – 7.60 (m, 2H), 7.57 (dd, *J* = 8.0, 1.2 Hz, 1H), 7.52 – 7.49 (m, 2H), 7.35 (td, *J* = 7.6, 1.2 Hz, 1H), 7.24 – 7.21 (m, 1H), 4.36 (s, 2H), 3.62 (s, 3H). <sup>13</sup>C NMR (151 MHz, Chloroform-*d*) δ 166.3, 145.2, 139.4, 134.0, 133.7, 132.9, 130.7, 130.1, 129.1, 128.4, 127.6, 124.0, 122.8, 54.9, 52.5. The analytical data are consistent with the literature.<sup>10</sup>

Methyl (Z)-3-(3,4-dichlorophenyl)-2-((phenylsulfonyl)methyl)acrylate (**1q**)

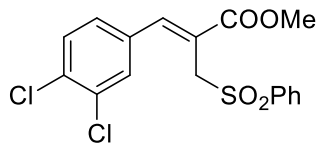

Purification by column chromatography (silica gel, PE:EA = 3:1, 5 x 22 cm) and recrystallization afforded the product as white solid; 1.27 g, yield: 66% (two steps); m.p. 97-99 °C. <sup>1</sup>H NMR (600 MHz, Chloroform-*d*) δ 7.85 – 7.83 (m, 2H), 7.82 (s, 1H), 7.66 – 7.63 (m, 1H), 7.53 – 7.50 (m, 2H), 7.49 (dd, *J* = 2.1, 0.7 Hz, 1H), 7.45 (d, *J* = 8.3 Hz, 1H), 7.37 (ddd, *J* = 8.3, 2.1, 0.7 Hz, 1H), 4.42 (s, 2H), 3.64 (s, 3H). <sup>13</sup>C NMR (151 MHz, Chloroform-*d*) δ 166.3, 143.4, 139.0, 134.0, 133.5, 133.1, 130.8, 130.8, 129.1, 128.5, 128.1, 122.8, 54.9, 52.6. TOF-HRMS Calcd. for C<sub>17</sub>H<sub>15</sub><sup>35</sup>Cl<sub>2</sub>O<sub>4</sub>S [M+H<sup>+</sup>]: 385.0063, found 385.0061; TOF-HRMS Calcd. for C<sub>17</sub>H<sub>15</sub><sup>37</sup>Cl<sub>2</sub>O<sub>4</sub>S [M+H<sup>+</sup>]: 387.0033, found 387.0027.

Methyl (Z)-3-(naphthalen-2-yl)-2-((phenylsulfonyl)methyl)acrylate (**1r**)

Purification by column chromatography (silica gel, PE:EA = 3:1, 5 x 22 cm) and

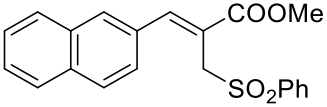
 recrystallization afforded the product as white solid; 1.54 g, yield: 84% (two steps); m.p. 124-126 °C. <sup>1</sup>H NMR (600 MHz, Chloroform-*d*) δ 8.10 (s, 1H), 8.04 – 8.03 (m, 1H), 7.87 – 7.86 (m, 3H), 7.84 – 7.82 (m, 2H), 7.57 – 7.51 (m, 4H), 7.46 – 7.43 (m, 2H), 4.58 (s, 2H), 3.64 (s, 3H). <sup>13</sup>C NMR (151 MHz, Chloroform-*d*) δ 166.9, 146.4, 139.4, 133.7, 133.5, 133.0, 131.1, 129.5, 129.0, 128.7, 128.6, 128.5, 127.6, 127.4, 126.7, 126.0, 121.0, 55.3, 52.4. The analytical data are consistent with the literature.<sup>11</sup>

Methyl (Z)-2-((phenylsulfonyl)methyl)-3-(thiophen-2-yl)acrylate (**1s**)

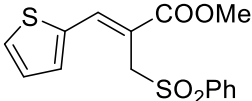
 Purification by column chromatography (silica gel, PE:EA = 3:1, 5 x 22 cm) and recrystallization afforded the product as white solid; 1.24 g, yield: 77% (two steps); m.p. 119-120 °C. <sup>1</sup>H NMR (400 MHz, Chloroform-*d*) δ 8.06 (s, 1H), 7.93 – 7.90 (m, 2H), 7.63 – 7.59 (m, 1H), 7.54 – 7.49 (m, 4H), 7.12 – 7.10 (m, 1H), 4.64 (s, 2H), 3.52 (s, 3H). <sup>13</sup>C NMR (101 MHz, Chloroform-*d*) δ 166.8, 139.4, 138.3, 136.8, 134.2, 133.8, 130.9, 129.0, 128.7, 127.8, 116.2, 56.0, 52.3. The analytical data are consistent with the literature.<sup>10</sup>

Methyl (Z)-3-(furan-2-yl)-2-((phenylsulfonyl)methyl)acrylate (**1t**)

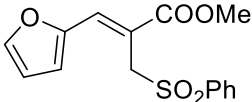
 Purification by column chromatography (silica gel, PE:EA = 3:1, 5 x 22 cm) and recrystallization afforded the product as white solid; 1.12 g, yield: 73% (two steps); m.p. 98-100 °C. <sup>1</sup>H NMR (600 MHz, Chloroform-*d*) δ 7.86 – 7.84 (m, 2H), 7.54 – 7.52 (m, 2H), 7.45 – 7.43 (m, 2H), 7.41 (d, *J* = 1.8 Hz, 1H), 6.69 (d, *J* = 3.5 Hz, 1H), 6.42 (dd, *J* = 3.5, 1.8 Hz, 1H), 4.80 (s, 2H), 3.61 (s, 3H). <sup>13</sup>C NMR (151 MHz, Chloroform-*d*) δ 166.9, 150.1, 145.8, 139.4, 133.5, 130.7, 128.7, 128.6, 119.0, 115.5, 112.2, 55.4, 52.4. The analytical data are consistent with the literature.<sup>11</sup>

Methyl (Z)-2-((phenylsulfonyl)methyl)-3-(pyridin-3-yl)acrylate (**1u**)

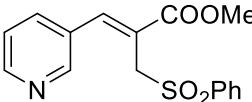
 Purification by column chromatography (silica gel, PE:EA = 3:1, 5 x 22 cm) afforded the product as colorless oil; 0.95 g, yield: 60% (two steps). <sup>1</sup>H NMR (600 MHz, Chloroform-*d*) δ 8.61 – 8.60 (m, 2H), 8.05 (d, *J* = 7.6 Hz, 1H), 7.91 (s, 1H), 7.86 – 7.84 (m, 2H), 7.65 – 7.62 (m, 1H), 7.53 – 7.50 (m,

2H), 7.37 (dd,  $J = 7.9, 4.8$  Hz, 1H), 4.43 (s, 2H), 3.62 (s, 3H).  $^{13}\text{C}$  NMR (151 MHz, Chloroform- $d$ )  $\delta$  166.2, 150.0, 149.8, 142.3, 139.0, 136.3, 134.0, 129.9, 129.2, 128.5, 123.7, 123.5, 54.9, 52.6. TOF-HRMS Calcd. for  $\text{C}_{16}\text{H}_{16}\text{NO}_4\text{S}$   $[\text{M}+\text{H}^+]$ : 318.0795, found 318.0789.

Methyl (Z)-4-methyl-2-((phenylsulfonyl)methyl)pent-2-enoate (**1v**)

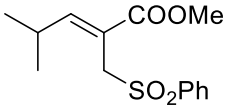 Purification by column chromatography (silica gel, PE:EA = 3:1, 5 x 22 cm) afforded the product as yellow oil; 0.73 g, yield: 52% (two steps).  $^1\text{H}$  NMR (600 MHz, Chloroform- $d$ )  $\delta$  7.86 – 7.84 (m, 2H), 7.64 – 7.51 (m, 1H), 7.54 – 7.51 (m, 2H), 6.89 (dt,  $J = 10.9, 1.3$  Hz, 1H), 4.23 (s, 2H), 3.46 (s, 3H), 1.01 (d,  $J = 1.5$  Hz, 3H), 1.00 (d,  $J = 1.5$  Hz, 3H).  $^{13}\text{C}$  NMR (151 MHz, Chloroform- $d$ )  $\delta$  166.2, 157.5, 138.9, 133.7, 128.9, 128.7, 118.0, 53.9, 52.0, 29.0, 21.5. The analytical data are consistent with the literature.<sup>12</sup>

Methyl (Z)-3-phenyl-2-(tosylmethyl)acrylate (**3a**)

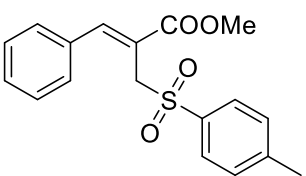 Purification by column chromatography (silica gel, PE:EA = 3:1, 5 x 22 cm) and recrystallization afforded the product as white solid; 1.37 g, yield: 83% (two steps); m.p. 116-118 °C.  $^1\text{H}$  NMR (600 MHz, Chloroform- $d$ )  $\delta$  7.93 (s, 1H), 7.72 – 7.70 (m, 2H), 7.47 – 7.45 (m, 2H), 7.38 – 7.36 (m, 3H), 7.27 – 7.26 (m, 3H), 4.47 (s, 2H), 3.61 (s, 3H), 2.42 (s, 3H).  $^{13}\text{C}$  NMR (151 MHz, Chloroform- $d$ )  $\delta$  167.0, 146.2, 144.7, 136.4, 133.7, 129.6, 129.2, 128.7, 128.6, 121.1, 55.1, 52.4, 21.6. The analytical data are consistent with the literature.<sup>10</sup>

Methyl (Z)-2-(((4-fluorophenyl)sulfonyl)methyl)-3-phenylacrylate (**3b**)

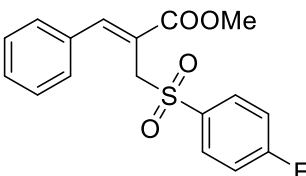 Purification by column chromatography (silica gel, PE:EA = 3:1, 5 x 22 cm) and recrystallization afforded the product as white solid; 1.42 g, yield: 85% (two steps); m.p. 92-93 °C.  $^1\text{H}$  NMR (600 MHz, Chloroform- $d$ )  $\delta$  7.94 (s, 1H), 7.84 – 7.82 (m, 2H), 7.45 – 7.43 (m, 2H), 7.39 – 7.37 (m, 3H), 7.15 – 7.12 (m, 2H), 4.51 (s, 2H), 3.66 (s, 3H).  $^{13}\text{C}$  NMR (151 MHz, Chloroform- $d$ )  $\delta$  166.8, 165.9 (d,  $J = 256.5$  Hz), 146.4, 135.2, 133.6, 131.4 (d,  $J = 9.6$  Hz), 129.8, 129.1, 128.8, 120.8, 116.2 (d,  $J = 22.6$  Hz).



Hz), 55.1, 52.1. The analytical data are consistent with the literature.<sup>10</sup>

Methyl (Z)-2-(((4-chlorophenyl)sulfonyl)methyl)-3-phenylacrylate (**3c**)

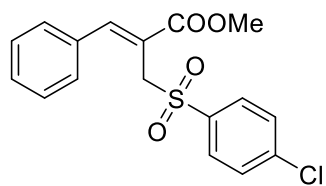

Purification by column chromatography (silica gel, PE:EA = 3:1, 5 x 22 cm) and recrystallization afforded the product as white solid; 1.37 g, yield: 78% (two steps); m.p. 96-98 °C.

<sup>1</sup>H NMR (600 MHz, Chloroform-*d*)  $\delta$  7.93 (s, 1H), 7.74 – 7.71 (m, 2H), 7.42 – 7.37 (m, 7H), 4.51 (s, 2H), 3.67 (s, 3H). <sup>13</sup>C NMR (151 MHz, Chloroform-*d*)  $\delta$  166.8, 146.4, 140.6, 137.5, 133.5, 130.0, 129.7, 129.3, 129.0, 128.8, 120.8, 54.9, 52.5. The analytical data are consistent with the literature.<sup>10</sup>

(Z)-2-((methylsulfonyl)methyl)-3-phenylacrylate (**3d**)

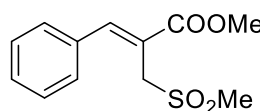

Purification by column chromatography (silica gel, PE:EA = 3:1, 5 x 22 cm) and recrystallization afforded the product as white solid; 1.09 g, yield: 86% (two steps); m.p. 92-94 °C. <sup>1</sup>H NMR

(600 MHz, Chloroform-*d*)  $\delta$  8.13 (s, 1H), 7.60 – 7.58 (m, 2H), 7.46 – 7.40 (m, 3H), 4.35 (s, 2H), 3.89 (s, 3H), 2.97 (s, 2H). <sup>13</sup>C NMR (151 MHz, Chloroform-*d*)  $\delta$  167.2, 147.1, 133.6, 130.1, 129.4, 129.0, 120.7, 54.2, 52.7, 42.5. The analytical data are consistent with the literature.<sup>13</sup>

Methyl (Z)-2-((*tert*-butylsulfonyl)methyl)-3-phenylacrylate (**3e**)

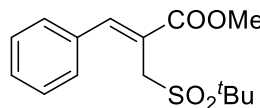

Purification by column chromatography (silica gel, PE:EA = 3:1, 5 x 22 cm) and recrystallization afforded the product as white

solid; 1.10 g, yield: 74% (three steps); m.p. 79-80 °C. <sup>1</sup>H NMR (600 MHz, Chloroform-*d*)  $\delta$  8.08 (s, 1H), 7.70 – 7.68 (m, 2H), 7.44 – 7.38 (m, 3H), 4.30 (s, 2H), 3.88 (s, 3H), 1.46 (s, 9H). <sup>13</sup>C NMR (151 MHz, Chloroform-*d*)  $\delta$  167.4, 146.2, 133.9, 129.7, 129.2, 128.7, 120.1, 60.4, 52.6, 45.4, 23.3. TOF-HRMS Calcd. for C<sub>15</sub>H<sub>21</sub>O<sub>4</sub>S [M+H<sup>+</sup>]: 297.1155, found 297.1147.

Methyl (E)-2-(phenoxy)methyl)-3-phenylacrylate (**3f**)

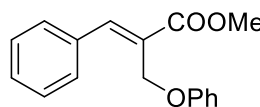

Purification by column chromatography (silica gel, PE:EA = 3:1, 5 x 22 cm) afforded the product as pale yellow oil; 0.87 g, yield:

65% (three steps); <sup>1</sup>H NMR (400 MHz, Chloroform-*d*)  $\delta$  8.07 (s, 1H), 7.51 – 7.48 (m,

2H), 7.38 – 7.37 (m, 3H), 7.34 – 7.30 (m, 2H), 7.02 – 6.98 (m, 3H), 4.84 (s, 2H), 3.86 (s, 3H). The analytical data are consistent with the literature.<sup>7</sup>

Ethyl (Z)-3-phenyl-2-((phenylsulfonyl)methyl)acrylate (**3g**)

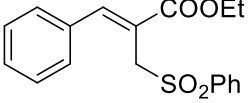 Purification by column chromatography (silica gel, PE:EA = 3:1, 5 x 22 cm) afforded the product as colorless oil; 1.44 g, yield: 87% (two steps). <sup>1</sup>H NMR (600 MHz, Chloroform-*d*) δ 7.93 (s, 1H), 7.86 – 7.84 (m, 2H), 7.61 – 7.58 (m, 1H), 7.49 – 7.46 (m, 4H), 7.37 – 7.35 (m, 3H), 4.49 (s, 2H), 4.05 (q, *J* = 7.2 Hz, 2H), 1.23 (t, *J* = 7.2 Hz, 3H). <sup>13</sup>C NMR (151 MHz, Chloroform-*d*) δ 166.4, 146.0, 139.3, 133.7, 129.6, 129.1, 129.0, 128.7, 128.5, 121.2, 61.5, 55.0, 14.0. The analytical data are consistent with the literature.<sup>14</sup>

*Tert*-butyl (Z)-3-phenyl-2-((phenylsulfonyl)methyl)acrylate (**3h**)

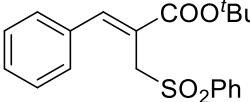 Purification by column chromatography (silica gel, PE:EA = 3:1, 5 x 22 cm) and recrystallization afforded the product as white solid; 1.58 g, yield: 88% (two steps); m.p. 76-78 °C. <sup>1</sup>H NMR (400 MHz, Chloroform-*d*) δ 7.86 – 7.82 (m, 3H), 7.61 – 7.56 (m, 1H), 7.49 – 7.45 (m, 2H), 7.42 – 7.38 (m, 2H), 7.36 – 7.32 (m, 3H), 4.47 (s, 2H), 1.44 (s, 9H). <sup>13</sup>C NMR (101 MHz, Chloroform-*d*) δ 165.4, 145.3, 139.4, 133.9, 133.6, 129.3, 129.0, 129.0, 128.7, 128.5, 122.5, 81.9, 54.9, 27.9. TOF-HRMS Calcd. for C<sub>20</sub>H<sub>23</sub>O<sub>4</sub>S [M+H<sup>+</sup>]: 359.1312, found 359.1310.

(Z)-3-phenyl-2-((phenylsulfonyl)methyl)acrylic acid (**3i**)

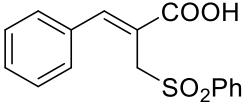 By recrystallization the product as white solid; 0.91 g, yield: 90%; m.p. 180-182 °C. <sup>1</sup>H NMR (600 MHz, Chloroform-*d*) δ 8.07 (s, 1H), 7.89 – 7.88 (m, 2H), 7.65 – 7.62 (m, 1H), 7.56 – 7.54 (m, 2H), 7.53 – 7.50 (m, 2H), 7.42 – 7.40 (m, 3H), 4.50 (s, 2H). The analytical data are consistent with the literature.<sup>15</sup>

(Z)-*N*,3-diphenyl-2-((phenylsulfonyl)methyl)acrylamide (**3j**)

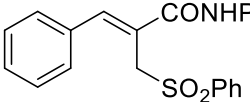 Purification by column chromatography (silica gel, PE:EA = 3:1, 5 x 22 cm) and recrystallization afforded the product as white solid; 0.74 g, yield: 65% (two steps); m.p. 148-144 °C. <sup>1</sup>H NMR (600 MHz, Chloroform-*d*) δ 8.52 (br s, 1H), 7.87 – 7.85 (m, 2H), 7.75 – 7.74 (m, 1H), 7.59 – 7.54

(m, 3H), 7.46 – 7.43 (m, 4H), 7.39 – 7.33 (m, 5H), 7.15 (tt,  $J = 7.4, 1.1$  Hz, 1H), 4.51 (s, 2H).  $^{13}\text{C}$  NMR (151 MHz, Chloroform- $d$ )  $\delta$  165.7, 142.4, 138.6, 137.9, 134.1, 133.8, 129.3, 129.3, 129.0, 128.8, 128.7, 128.2, 125.9, 124.6, 120.1, 55.8. TOF-HRMS Calcd. for  $\text{C}_{22}\text{H}_{20}\text{NO}_3\text{S}$   $[\text{M}+\text{H}^+]$ : 378.1158, found 378.1149.

Methyl (*E*)-2-methyl-3-phenylacrylate (**3k**)

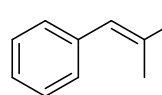

Purification by column chromatography (silica gel, PE:EA = 10:1, 5 x 22 cm) afforded the product as colorless oil; 0.87 g, yield: 99%;  $^1\text{H}$  NMR (600 MHz, Chloroform- $d$ )  $\delta$  7.70 (s, 1H), 7.40 (d,  $J = 4.3$  Hz, 4H), 7.34 – 7.31 (m, 1H), 3.82 (s, 3H), 2.13 (d,  $J = 1.5$  Hz, 3H). The analytical data are consistent with the literature.<sup>9</sup>

#### 4. General procedure for asymmetric hydrogenation of **1** and **3**

**General procedure:** A stock solution was made by mixing 1.0 mol %  $[\text{Rh}(\text{COD})\text{Cl}]_2$  with 2.2 mol % (*R,R*)-f-spiroPhos in solvent (MeOH) at room temperature for 20 min in a nitrogen-filled glovebox. An aliquot of the catalyst solution (2.0 mL, 0.0025 mmol) was transferred by syringe into the vials charged with different substrates (0.125 mmol for each). The vials were subsequently transferred into which hydrogen gas was charged. The reaction was then stirred under  $\text{H}_2$  (10 atm) at 90 °C for 48 h. The hydrogen gas was released slowly and carefully. The solution was passed through a short column of silica gel to remove the metal complex. The conversion of products were determined by GC or  $^1\text{H}$  NMR analysis. The crude products were concentrated and purified by flash column chromatography and the ee values were determined by HPLC, SFC analysis on a chiral stationary phase.

**Gram scale experiment:** A stock solution was made by mixing 1.0 mol %  $[\text{Rh}(\text{COD})\text{Cl}]_2$  with 2.2 mol % (*R,R*)-f-spiroPhos in solvent (MeOH) at room temperature for 20 min in a nitrogen-filled glovebox. An aliquot of the catalyst solution (0.064 mmol) was transferred by syringe into the vials charged with substrates **1a** (3.2 mmol). The vials were subsequently transferred into which hydrogen gas was charged. The reaction was then stirred under  $\text{H}_2$  (10 atm) at 90 °C for 48 h. The hydrogen gas was released slowly and carefully. The solution was passed through a short column of

silica gel to remove the metal complex. The solid was washed with CH<sub>2</sub>Cl<sub>2</sub>, and filtered to give the product **2a** as a white solid (0.99 g, 97% yield) with 96% ee determined by HPLC with a chiral column.

A stock solution was made by mixing 1.0 mol % [Rh(COD)Cl]<sub>2</sub> with 2.2 mol % (*R,R*)-f-spiroPhos in solvent (MeOH) at room temperature for 20 min in a nitrogen-filled glovebox. An aliquot of the catalyst solution (0.0035 mmol) was transferred by syringe into the vials charged with substrates **3e** (3.5 mmol). The vials were subsequently transferred into which hydrogen gas was charged. The reaction was then stirred under H<sub>2</sub> (80 atm) at 90 °C for 5 d. The hydrogen gas was released slowly and carefully. The solution was passed through a short column of silica gel to remove the metal complex. The solid was washed with CH<sub>2</sub>Cl<sub>2</sub>, and filtered to give the product **4e** as a white solid (1.00 g, 96% yield) with 97% ee determined by SFC with a chiral column.

**Deuteration experiment:** A stock solution was made by mixing 1.0 mol % [Rh(COD)Cl]<sub>2</sub> with 2.2 mol % (*R,R*)-f-spiroPhos in solvent (MeOH) at room temperature for 20 min in a nitrogen-filled glovebox. An aliquot of the catalyst solution (2.0 mL, 0.0025 mmol) was transferred by syringe into the vials charged with substrates **1a** (0.125 mmol). The vials were subsequently transferred into which D<sub>2</sub> gas was charged. The reaction was then stirred under D<sub>2</sub> (10 atm) at 90 °C for 48 h. The hydrogen gas was released slowly and carefully. The solution was passed through a short column of silica gel to remove the metal complex. The product was analyzed by <sup>1</sup>H NMR analysis. **2a-D-1**: <sup>1</sup>H NMR (600 MHz, Chloroform-*d*) δ 7.85 – 7.83 (m, 2H), 7.66 – 7.63 (m, 1H), 7.55 – 7.52 (m, 2H), 7.26 – 7.20 (m, 3H), 7.05 – 7.04 (m, 2H), 3.65 – 3.61 (m, 1H), 3.53 (m, 3H), 3.13 – 3.10 (m, 1H), 2.85 – 2.81 (m, 1H).

A stock solution was made by mixing 1.0 mol % [Rh(COD)Cl]<sub>2</sub> with 2.2 mol % (*R,R*)-f-spiroPhos in solvent (CD<sub>3</sub>OD) at room temperature for 20 min in a nitrogen-filled glovebox. An aliquot of the catalyst solution (2.0 mL, 0.0025 mmol) was transferred by syringe into the vials charged with substrates **1a** (0.125 mmol). The vials were subsequently transferred into which H<sub>2</sub> gas was charged. The reaction was then

stirred under H<sub>2</sub> (10 atm) at 90 °C for 48 h. The hydrogen gas was released slowly and carefully. The solution was passed through a short column of silica gel to remove the metal complex. The product was analyzed by <sup>1</sup>H NMR analysis. **2a-D-2**: <sup>1</sup>H NMR (400 MHz, Chloroform-*d*) δ 7.85 – 7.83 (m, 2H), 7.64 (t, *J* = 7.4 Hz, 1H), 7.53 (t, *J* = 7.6 Hz, 2H), 7.26 – 7.19 (m, 3H), 7.06 – 7.04 (m, 2H), 3.64 (dd, *J* = 14.2, 9.2 Hz, 1H), 3.53 (s, 3H), 3.23 – 3.09 (m, 2H), 3.03 (dd, *J* = 13.7, 6.9 Hz, 1H), 2.83 (dd, *J* = 13.7, 7.8 Hz, 1H).

## 5. NMR, HPLC or SFC and HPLC, optical rotation and HRMS data of compounds **2** and **4**

### Methyl 2-benzyl-3-(phenylsulfonyl)propanoate (**2a**)

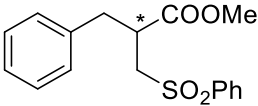 Purification by flash column chromatography (silica gel, PE:EA = 3:1) afforded the product as white solid; 39.4 mg, yield: 99%; 98% ee; HPLC condition: Lux 5u Cellulose-2 (250 × 4.60 mm), ipa:hex = 50:50, 1 mL/min, 210 nm; *t*<sub>R</sub> = 12.0 min (major), *t*<sub>R</sub> = 14.7 min (minor); m.p. 102-104 °C. <sup>1</sup>H NMR (600 MHz, Chloroform-*d*) δ 7.84 – 7.83 (m, 2H), 7.66 – 7.63 (m, 1H), 7.55 – 7.52 (m, 2H), 7.26 – 7.20 (m, 3H), 7.05 – 7.04 (m, 2H), 3.66 – 3.62 (m, 1H), 3.53 (m, 3H), 3.21 – 3.17 (m, 1H), 3.11 (ddd, *J* = 14.4, 3.4, 1.2 Hz, 1H), 3.03 (dd, *J* = 13.7, 7.0 Hz, 1H), 2.82 (dd, *J* = 13.7, 7.9 Hz, 1H). <sup>13</sup>C NMR (151 MHz, Chloroform-*d*) δ 172.8, 138.8, 136.5, 133.8, 129.2, 128.8, 128.7, 128.7, 128.1, 127.1, 56.2, 52.1, 41.7, 38.0. TOF-HRMS Calcd. for C<sub>17</sub>H<sub>19</sub>O<sub>4</sub>S [M+H<sup>+</sup>]: 319.0999, found 319.0994.

### Methyl 2-(4-methylbenzyl)-3-(phenylsulfonyl)propanoate (**2b**)

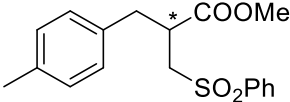 Purification by flash column chromatography (silica gel, PE:EA = 3:1) afforded the product as pale yellow solid; 40.7 mg, yield: 98%; 97% ee; [α]<sub>D</sub><sup>30</sup> = + 10.7 (c = 1.0, CH<sub>2</sub>Cl<sub>2</sub>); HPLC condition: Lux 5u Cellulose-2 (250 × 4.60 mm), ipa:hex = 50:50, 1 mL/min, 210 nm; *t*<sub>R</sub> = 13.9 min (major), *t*<sub>R</sub> = 16.9 min (minor); m.p. 67-68 °C. <sup>1</sup>H NMR (600 MHz, Chloroform-*d*) δ 7.84 (d, *J* = 7.8 Hz, 2H), 7.64 (t, *J* = 7.3 Hz, 1H), 7.53 (t, *J* = 7.8 Hz, 2H), 7.05 (d, *J* = 7.8 Hz, 2H), 6.93 (d, *J* = 7.6 Hz, 2H), 3.62 (dd, *J* = 14.2, 9.2 Hz, 1H), 3.54 (s, 3H), 3.19 – 3.15 (m, 1H), 3.11 (dd, *J* = 14.0, 3.4 Hz, 1H), 2.99 (dd, *J* = 13.8, 6.8 Hz, 1H), 2.78 (dd, *J* =

13.8, 8.1 Hz, 1H), 2.30 (s, 3H).  $^{13}\text{C}$  NMR (101 MHz, Chloroform-*d*)  $\delta$  172.9, 138.9, 136.7, 133.8, 133.3, 129.4, 129.2, 128.7, 128.1, 56.2, 52.1, 41.8, 37.6, 21.0. TOF-HRMS Calcd. for  $\text{C}_{18}\text{H}_{21}\text{O}_4\text{S}$   $[\text{M}+\text{H}^+]$ : 333.1155, found 333.1150.

Methyl 2-(4-methoxybenzyl)-3-(phenylsulfonyl)propanoate (**2c**)

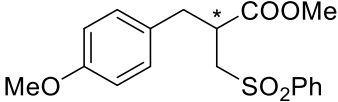 Purification by flash column chromatography (silica gel, PE:EA = 3:1) afforded the product as pale yellow oil; 43.1 mg, yield: 99%; 92% ee;  $[\alpha]_{\text{D}}^{30} = +16.2$  ( $c = 1.0$ ,  $\text{CH}_2\text{Cl}_2$ ); HPLC condition: Lux 5u Cellulose-2 (250  $\times$  4.60 mm), ipa:hex = 50:50, 1 mL/min, 210 nm;  $t_{\text{R}} = 19.2$  min (major),  $t_{\text{R}} = 24.3$  min (minor).  $^1\text{H}$  NMR (600 MHz, Chloroform-*d*)  $\delta$  7.84 – 7.82 (m, 2H), 7.64 – 7.61 (m, 1H), 7.52 (t,  $J = 7.7$  Hz, 2H), 6.96 – 6.94 (m, 2H), 6.78 – 6.76 (m, 2H), 3.76 (s, 3H), 3.61 (dd,  $J = 14.1, 9.0$  Hz, 1H), 3.52 (s, 3H), 3.18 – 3.08 (m, 2H), 2.96 (dd,  $J = 13.8, 6.9$  Hz, 1H), 2.76 (dd,  $J = 13.9, 7.7$  Hz, 1H).  $^{13}\text{C}$  NMR (151 MHz, Chloroform-*d*)  $\delta$  172.9, 158.6, 138.8, 133.7, 129.8, 129.2, 128.4, 128.1, 114.0, 56.1, 55.1, 52.1, 41.9, 37.1. TOF-HRMS Calcd. for  $\text{C}_{18}\text{H}_{21}\text{O}_5\text{S}$   $[\text{M}+\text{H}^+]$ : 349.1104, found 349.1101.

Methyl 2-(4-(benzyloxy)benzyl)-3-(phenylsulfonyl)propanoate (**2d**)

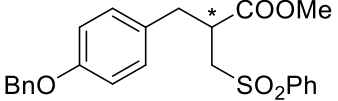 Purification by flash column chromatography (silica gel, PE:EA = 3:1) afforded the product as white solid; 51.5 mg, yield: 97%; 92% ee;  $[\alpha]_{\text{D}}^{30} = +11.7$  ( $c = 1.0$ ,  $\text{CH}_2\text{Cl}_2$ ); SFC condition: Lux 5u Amylose-2 (250  $\times$  4.60 mm),  $\text{CO}_2$ :MeOH = 80:20, 3 mL/min, 230 nm;  $t_{\text{R}} = 5.7$  min (major),  $t_{\text{R}} = 7.4$  min (minor); m.p. 98-99  $^{\circ}\text{C}$ .  $^1\text{H}$  NMR (600 MHz, Chloroform-*d*)  $\delta$  7.85 – 7.83 (m, 2H), 7.64 (t,  $J = 7.6$  Hz, 1H), 7.53 (t,  $J = 7.7$  Hz, 2H), 7.43 (d,  $J = 6.9$  Hz, 2H), 7.39 (t,  $J = 7.5$  Hz, 2H), 7.35 – 7.32 (m, 1H), 6.97 – 6.96 (m, 2H), 6.87 – 6.85 (m, 2H), 5.03 (s, 2H), 3.62 (dd,  $J = 14.1, 9.0$  Hz, 1H), 3.53 (s, 3H), 3.18 – 3.10 (m, 1H), 2.97 (dd,  $J = 13.9, 6.8$  Hz, 1H), 2.77 (dd,  $J = 13.9, 7.7$  Hz, 1H).  $^{13}\text{C}$  NMR (151 MHz, Chloroform-*d*)  $\delta$  172.9, 157.8, 138.9, 136.9, 133.8, 129.9, 129.2, 128.7, 128.6, 128.1, 128.0, 127.4, 115.1, 70.0, 56.2, 52.2, 41.9, 37.2. TOF-HRMS Calcd. for  $\text{C}_{24}\text{H}_{25}\text{O}_5\text{S}$   $[\text{M}+\text{H}^+]$ : 425.1417, found 425.1417.

4-(3-Methoxy-3-oxo-2-((phenylsulfonyl)methyl)propyl)phenyl benzoate (**2e**)

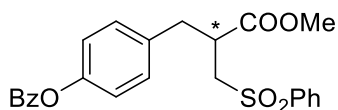

Purification by flash column chromatography (silica gel, PE:EA = 3:1) afforded the product as yellow solid; 52.6 mg, yield: 96%; 96% ee;  $[\alpha]_{\text{D}}^{30} = +8.4$  ( $c = 1.0$ ,  $\text{CH}_2\text{Cl}_2$ );

SFC condition: Lux 5u Cellulose-1 ( $250 \times 4.60$  mm),  $\text{CO}_2$ :MeOH = 80:20, 3 mL/min, 210 nm;  $t_{\text{R}} = 6.3$  min (major),  $t_{\text{R}} = 6.9$  min (minor); m.p. 156-158 °C.  $^1\text{H}$  NMR (400 MHz, Chloroform- $d$ )  $\delta$  8.20 – 8.18 (m, 2H), 7.88 – 7.85 (m, 2H), 7.68 – 7.62 (m, 2H), 7.58 – 7.49 (m, 4H), 7.13 – 7.11 (m, 4H), 3.65 (dd,  $J = 14.0, 8.7$  Hz, 1H), 3.56 (s, 3H), 3.25 – 3.13 (m, 2H), 3.06 (dd,  $J = 13.8, 7.1$  Hz, 1H), 2.90 (dd,  $J = 13.8, 7.5$  Hz, 1H).  $^{13}\text{C}$  NMR (101 MHz, Chloroform- $d$ )  $\delta$  172.7, 165.0, 150.0, 138.8, 134.2, 133.9, 133.6, 130.1, 129.9, 129.4, 129.3, 128.6, 128.1, 122.0, 56.2, 52.3, 41.7, 37.3. TOF-HRMS Calcd. for  $\text{C}_{24}\text{H}_{23}\text{O}_6\text{S}$   $[\text{M}+\text{H}^+]$ : 439.1210, found 439.1207.

4-(3-Methoxy-3-oxo-2-((phenylsulfonyl)methyl)propyl)phenyl 4-methoxybenzoate

(2f)

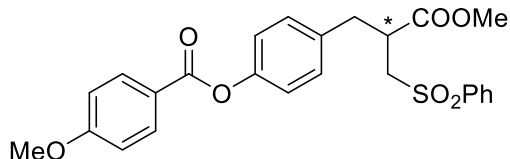

Purification by flash column chromatography (silica gel, PE:EA = 3:1) afforded the product as yellow solid; 56.2 mg, yield: 96%; 92% ee;  $[\alpha]_{\text{D}}^{30} = +9.6$  ( $c = 1.0$ ,  $\text{CH}_2\text{Cl}_2$ );

SFC condition: Lux 5u Amylose-1 ( $250 \times 4.60$  mm),  $\text{CO}_2$ :MeOH = 70:30, 3 mL/min, 210 nm;  $t_{\text{R}} = 9.8$  min (minor),  $t_{\text{R}} = 11.3$  min (major); m.p. 120-121 °C.  $^1\text{H}$  NMR (600 MHz, Chloroform- $d$ )  $\delta$  8.15 – 8.13 (m, 2H), 7.87 – 7.85 (m, 2H), 7.67 – 7.64 (m, 1H), 7.57 – 7.54 (m, 2H), 7.11 – 7.09 (m, 4H), 7.00 – 6.97 (m, 2H), 3.90 (s, 3H), 3.65 (dd,  $J = 14.3, 8.9$  Hz, 1H), 3.56 (s, 3H), 3.23 – 3.19 (m, 1H), 3.15 (dd,  $J = 14.3, 3.7$  Hz, 1H), 3.05 (dd,  $J = 13.8, 7.2$  Hz, 1H), 2.89 (dd,  $J = 13.8, 7.6$  Hz, 1H).  $^{13}\text{C}$  NMR (151 MHz, Chloroform- $d$ )  $\delta$  172.8, 164.8, 163.9, 150.1, 138.8, 134.0, 133.9, 132.3, 129.9, 129.3, 128.2, 122.1, 121.7, 113.9, 56.2, 55.5, 52.3, 41.7, 37.3. TOF-HRMS Calcd. for  $\text{C}_{25}\text{H}_{25}\text{O}_7\text{S}$   $[\text{M}+\text{H}^+]$ : 469.1316, found 469.1310.

Methyl 2-(4-(((benzyloxy)carbonyl)oxy)benzyl)-3-(phenylsulfonyl)propanoate (2g)

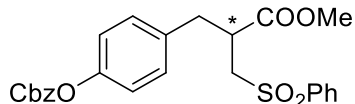

Purification by flash column chromatography (silica gel, PE:EA = 3:1) afforded the product as yellow solid; 56.8

mg, yield: 97%; 93% ee;  $[\alpha]_{\text{D}}^{30} = + 4.5$  ( $c = 1.0$ ,  $\text{CH}_2\text{Cl}_2$ ); SFC condition: Lux 5u Cellulose-1 ( $250 \times 4.60$  mm),  $\text{CO}_2:\text{MeOH} = 80:20$ , 3 mL/min, 210 nm;  $t_{\text{R}} = 6.7$  min (major),  $t_{\text{R}} = 7.3$  min (minor); m.p. 90-92 °C.  $^1\text{H}$  NMR (400 MHz, Chloroform-*d*)  $\delta$  7.87 – 7.81 (m, 2H), 7.68 – 7.60 (m, 1H), 7.55 – 7.51 (m, 2H), 7.45 – 7.36 (m, 5H), 7.11 – 7.03 (m, 4H), 5.26 (s, 2H), 3.66 – 3.60 (m, 1H), 3.53 (s, 3H), 3.21 – 3.10 (m, 2H), 3.01 (dd,  $J = 13.8, 7.1$  Hz, 1H), 2.86 (dd,  $J = 13.8, 7.4$  Hz, 1H).  $^{13}\text{C}$  NMR (101 MHz, Chloroform-*d*)  $\delta$  172.6, 153.4, 150.1, 138.7, 134.6, 134.3, 133.8, 129.8, 129.2, 128.7, 128.6, 128.4, 128.0, 121.2, 70.3, 56.1, 52.2, 41.6, 37.1. TOF-HRMS Calcd. for  $\text{C}_{25}\text{H}_{25}\text{O}_7\text{S}$   $[\text{M}+\text{H}^+]$ : 469.1316, found 469.1314.

**Methyl 2-(4-hydroxybenzyl)-3-(phenylsulfonyl)propanoate (2h)**

Purification by flash column chromatography (silica gel, PE:EA = 3:1) afforded the product as white solid; 39.7 mg, yield: 95%; 92% ee;  $[\alpha]_{\text{D}}^{30} = + 5.9$  ( $c = 1.0$ ,  $\text{CH}_2\text{Cl}_2$ ); HPLC condition: Lux 5u Cellulose-2 ( $250 \times 4.60$  mm), ipa:hex = 50:50, 1 mL/min, 210 nm;  $t_{\text{R}} = 8.3$  min (major),  $t_{\text{R}} = 9.5$  min (minor); m.p. 136-138 °C.  $^1\text{H}$  NMR (600 MHz, Chloroform-*d*)  $\delta$  7.84 – 7.82 (m, 2H), 7.64 (t,  $J = 7.7$  Hz, 1H), 7.53 (t,  $J = 7.7$  Hz, 2H), 6.90 – 6.89 (m, 2H), 6.70 – 6.69 (m, 2H), 3.61 (dd,  $J = 14.0, 9.0$  Hz, 1H), 3.52 (s, 3H), 3.16 – 3.09 (m, 2H), 2.95 (dd,  $J = 13.9, 6.8$  Hz, 1H), 2.75 (dd,  $J = 13.9, 7.6$  Hz, 1H).  $^{13}\text{C}$  NMR (151 MHz, Chloroform-*d*)  $\delta$  173.1, 154.8, 138.8, 133.9, 130.1, 129.3, 128.4, 128.2, 115.6, 56.2, 52.2, 41.9, 37.2. TOF-HRMS Calcd. for  $\text{C}_{17}\text{H}_{19}\text{O}_5\text{S}$   $[\text{M}+\text{H}^+]$ : 335.0948, found 335.0942.

**(S)-Methyl 2-(4-bromobenzyl)-3-(phenylsulfonyl)propanoate (2i)**

Purification by flash column chromatography (silica gel, PE:EA = 3:1) afforded the product as white solid; 48.2 mg, yield: 97%; 99% ee;  $[\alpha]_{\text{D}}^{30} = + 11.0$  ( $c = 1.0$ ,  $\text{CH}_2\text{Cl}_2$ ); HPLC condition: Lux 5u Cellulose-2 ( $250 \times 4.60$  mm), ipa:hex = 50:50, 1 mL/min, 210 nm;  $t_{\text{R}} = 18.4$  min (major),  $t_{\text{R}} = 22.9$  min (minor); m.p. 88-90 °C.  $^1\text{H}$  NMR (600 MHz, Chloroform-*d*)  $\delta$  7.86 – 7.84 (m, 2H), 7.68 – 7.65 (m, 1H), 7.56 – 7.53 (m, 2H), 7.39 – 7.36 (m, 2H), 6.96 – 6.93 (m, 2H), 3.61 (dd,  $J = 14.3, 8.7$  Hz, 1H), 3.54 (s, 3H), 3.20 – 3.16 (m, 1H), 3.09 (dd,  $J = 14.3, 4.0$  Hz, 1H), 2.99 (dd,  $J = 13.9, 7.3$  Hz, 1H), 2.84 (dd,



$J = 13.9, 7.4$  Hz, 1H).  $^{13}\text{C}$  NMR (151 MHz, Chloroform- $d$ )  $\delta$  172.6, 138.8, 135.6, 133.9, 131.8, 130.6, 129.3, 128.1, 121.1, 56.2, 52.3, 41.5, 37.3. TOF-HRMS Calcd. for  $\text{C}_{17}\text{H}_{18}^{79}\text{BrO}_4\text{S}$   $[\text{M}+\text{H}^+]$ : 397.0104, found 397.0103; TOF-HRMS Calcd. for  $\text{C}_{17}\text{H}_{18}^{81}\text{BrO}_4\text{S}$   $[\text{M}+\text{H}^+]$ : 399.0090, found 399.0083.

**Methyl 2-(4-nitrobenzyl)-3-(phenylsulfonyl)propanoate (2j)**

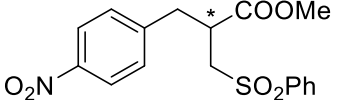 Purification by flash column chromatography (silica gel, PE:EA = 3:1) afforded the product as yellow solid; 41.8 mg, yield: 92%; 98% ee;  $[\alpha]_{\text{D}}^{30} = +22.8$  ( $c = 1.0$ ,  $\text{CH}_2\text{Cl}_2$ ); HPLC condition: Lux 5u Cellulose-2 ( $250 \times 4.60$  mm), ipa:hex = 30:70, 1 mL/min, 210 nm;  $t_{\text{R}} = 54.2$  min (major),  $t_{\text{R}} = 63.4$  min (minor); m.p. 116–118 °C.  $^1\text{H}$  NMR (600 MHz, Chloroform- $d$ )  $\delta$  7.84 – 7.82 (m, 2H), 7.65 – 7.62 (m, 1H), 7.54 – 7.51 (m, 2H), 6.82 – 6.81 (m, 2H), 6.57 – 6.56 (m, 2H), 3.60 (dd,  $J = 15.0, 10.1$  Hz, 1H), 3.52 (s, 3H), 3.13 – 3.08 (m, 2H), 2.91 (dd,  $J = 13.9, 6.6$  Hz, 1H), 2.69 (dd,  $J = 13.9, 7.8$  Hz, 1H).  $^{13}\text{C}$  NMR (101 MHz, Chloroform- $d$ )  $\delta$  173.1, 145.3, 138.8, 133.8, 129.7, 129.2, 128.1, 126.1, 115.3, 56.1, 52.1, 41.9, 37.3. TOF-HRMS Calcd. for  $\text{C}_{17}\text{H}_{18}\text{NO}_6\text{S}$   $[\text{M}+\text{H}^+]$ : 364.0849, found 364.0842.

**Methyl 2-(3-methylbenzyl)-3-(phenylsulfonyl)propanoate (2k)**

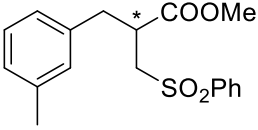 Purification by flash column chromatography (silica gel, PE:EA = 3:1) afforded the product as yellow oil; 40.7 mg, yield: 98%; 98% ee;  $[\alpha]_{\text{D}}^{30} = +1.3$  ( $c = 1.0$ ,  $\text{CH}_2\text{Cl}_2$ ); HPLC condition: Lux 5u Cellulose-2 ( $250 \times 4.60$  mm), ipa:hex = 50:50, 1 mL/min, 210 nm;  $t_{\text{R}} = 13.3$  min (major),  $t_{\text{R}} = 16.5$  min (minor).  $^1\text{H}$  NMR (400 MHz, Chloroform- $d$ )  $\delta$  7.83 (d,  $J = 7.6$  Hz, 2H), 7.64 (t,  $J = 7.4$  Hz, 1H), 7.53 (t,  $J = 7.5$  Hz, 2H), 7.13 (t,  $J = 7.5$  Hz, 1H), 7.02 (d,  $J = 7.6$  Hz, 1H), 6.83 (d,  $J = 8.7$  Hz, 2H), 3.63 (dd,  $J = 14.0, 9.2$  Hz, 1H), 3.54 (s, 3H), 3.19 – 3.10 (m, 2H), 2.99 (dd,  $J = 13.6, 6.5$  Hz, 1H), 2.76 (dd,  $J = 13.7, 8.0$  Hz, 1H), 2.28 (s, 3H).  $^{13}\text{C}$  NMR (151 MHz, Chloroform- $d$ )  $\delta$  172.9, 138.8, 138.3, 136.4, 133.7, 129.6, 129.2, 128.5, 128.1, 127.8, 125.8, 56.1, 52.1, 41.8, 37.9, 21.3. TOF-HRMS Calcd. for  $\text{C}_{18}\text{H}_{21}\text{O}_4\text{S}$   $[\text{M}+\text{H}^+]$ : 333.1155, found 333.1147.

**Methyl 2-(3-methoxybenzyl)-3-(phenylsulfonyl)propanoate (2l)**

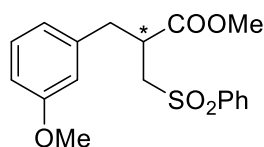

Purification by flash column chromatography (silica gel, PE:EA = 3:1) afforded the product as yellow oil; 41.4 mg, yield: 95%; 95% ee;  $[\alpha]_{\text{D}}^{30} = -3.4$  ( $c = 1.0$ ,  $\text{CH}_2\text{Cl}_2$ ); SFC condition: Lux 5u

Amylose-2 ( $250 \times 4.60$  mm),  $\text{CO}_2:\text{MeOH} = 80:20$ , 3 mL/min, 210 nm;  $t_{\text{R}} = 4.6$  min (minor),  $t_{\text{R}} = 4.9$  min (major).  $^1\text{H}$  NMR (600 MHz,  $\text{CHCl}_3$ )  $\delta$  7.84 – 7.82 (m, 2H), 7.64 (td,  $J = 7.4, 1.3$  Hz, 1H), 7.54 – 7.52 (m, 2H), 7.17 – 7.14 (m, 1H), 6.76 – 6.75 (m, 1H), 6.62 (d,  $J = 7.5$  Hz, 1H), 6.59 – 6.58 (m, 1H), 3.75 (s, 3H), 3.63 (dd,  $J = 14.6, 9.4$  Hz, 1H), 3.55 (s, 3H), 3.20 – 3.15 (m, 1H), 3.14 – 3.11 (m, 1H), 3.01 (dd,  $J = 13.8, 6.8$  Hz, 1H), 2.80 – 2.77 (m, 1H).  $^{13}\text{C}$  NMR (151 MHz,  $\text{CHCl}_3$ )  $\delta$  172.8, 159.8, 138.0, 133.8, 129.7, 129.2, 128.1, 121.1, 114.4, 112.5, 56.1, 55.1, 52.2, 41.6, 37.9. TOF-HRMS Calcd. for  $\text{C}_{18}\text{H}_{21}\text{O}_5\text{S}$   $[\text{M}+\text{H}^+]$ : 349.1104, found 349.1102.

Methyl 2-(3-fluorobenzyl)-3-(phenylsulfonyl)propanoate (**2m**)

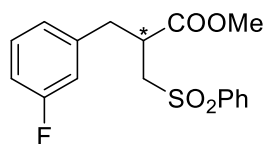

Purification by flash column chromatography (silica gel, PE:EA = 3:1) afforded the product as yellow solid; 40.8 mg, yield: 97%; 99.2% ee;  $[\alpha]_{\text{D}}^{30} = +2.7$  ( $c = 1.0$ ,  $\text{CH}_2\text{Cl}_2$ ); SFC condition: Lux

5u Amylose-1 ( $250 \times 4.60$  mm),  $\text{CO}_2:\text{MeOH} = 80:20$ , 3 mL/min, 210 nm;  $t_{\text{R}} = 2.8$  min (minor),  $t_{\text{R}} = 3.6$  min (major); m.p. 70-72 °C.  $^1\text{H}$  NMR (400 MHz,  $\text{CHCl}_3$ )  $\delta$  7.85 (d,  $J = 7.7$  Hz, 2H), 7.65 (t,  $J = 7.4$  Hz, 1H), 7.54 (t,  $J = 7.6$  Hz, 2H), 7.24 – 7.19 (m, 1H), 6.91 (td,  $J = 8.5, 2.5$  Hz, 1H), 6.85 (d,  $J = 7.6$  Hz, 1H), 6.75 (d,  $J = 9.6$  Hz, 1H), 3.62 (dd,  $J = 14.2, 8.7$  Hz, 1H), 3.54 (s, 3H), 3.21 – 3.15 (m, 1H), 3.13 – 3.08 (m, 1H), 3.02 (dd,  $J = 13.8, 7.1$  Hz, 1H), 2.86 (dd,  $J = 13.8, 7.5$  Hz, 1H).  $^{13}\text{C}$  NMR (151 MHz,  $\text{CHCl}_3$ )  $\delta$  172.5, 162.7 (d,  $J = 246.9$  Hz), 139.0 (d,  $J = 7.3$  Hz), 138.6, 133.9, 130.2 (d,  $J = 8.4$  Hz), 129.3, 128.1, 124.6 (d,  $J = 2.9$  Hz), 115.7 (d,  $J = 21.1$  Hz), 114.1 (d,  $J = 20.9$  Hz), 56.1, 52.2, 41.5, 37.5. TOF-HRMS Calcd. for  $\text{C}_{17}\text{H}_{18}\text{FO}_4\text{S}$   $[\text{M}+\text{H}^+]$ : 337.0904, found 337.0896.

Methyl 2-(3-bromobenzyl)-3-(phenylsulfonyl)propanoate (**2n**)

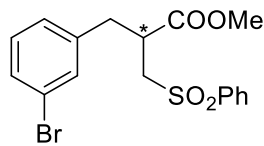

Purification by flash column chromatography (silica gel, PE:EA = 3:1) afforded the product as yellow oil; 47.7 mg, yield: 96%; 99.8% ee;  $[\alpha]_{\text{D}}^{30} = +3.3$  ( $c = 1.0$ ,  $\text{CH}_2\text{Cl}_2$ ); SFC condition: Lux

5u Amylose-2 (250 × 4.60 mm), CO<sub>2</sub>:MeOH = 80:20, 3 mL/min, 210 nm; *t<sub>R</sub>* = 5.4 min (minor), *t<sub>R</sub>* = 6.2 min (major). <sup>1</sup>H NMR (600 MHz, Chloroform-*d*) δ 7.86 – 7.84 (m, 2H), 7.67 – 7.65 (m, 1H), 7.57 – 7.54 (m, 2H), 7.35 (ddd, *J* = 8.0, 2.0, 1.0 Hz, 1H), 7.20 (t, *J* = 1.8 Hz, 1H), 7.13 (t, *J* = 7.8 Hz, 1H), 7.00 (dt, *J* = 7.7, 1.3 Hz, 1H), 3.62 (dd, *J* = 14.3, 8.8 Hz, 1H), 3.54 (s, 3H), 3.19 – 3.14 (m, 1H), 3.10 (dd, *J* = 14.3, 4.0 Hz, 1H), 2.99 (dd, *J* = 13.8, 7.3 Hz, 1H), 2.83 (dd, *J* = 13.8, 7.4 Hz, 1H). <sup>13</sup>C NMR (151 MHz, Chloroform-*d*) δ 172.5, 138.9, 138.7, 134.0, 131.9, 130.3, 130.2, 129.3, 128.1, 127.5, 122.7, 56.2, 52.3, 41.6, 37.4. TOF-HRMS Calcd. for C<sub>17</sub>H<sub>18</sub><sup>79</sup>BrO<sub>4</sub>S [M+H<sup>+</sup>]: 397.0104, found 397.0103; TOF-HRMS Calcd. for C<sub>17</sub>H<sub>18</sub><sup>81</sup>BrO<sub>4</sub>S [M+H<sup>+</sup>]: 399.0090, found 399.0083.

Methyl 2-(2-fluorobenzyl)-3-(phenylsulfonyl)propanoate (**2o**)

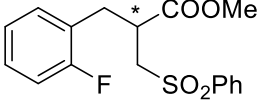 Purification by flash column chromatography (silica gel, PE:EA = 3:1) afforded the product as yellow oil; 40.8 mg, yield: 97%; 96% ee; [*α*]<sub>D</sub><sup>30</sup> = + 5.2 (*c* = 1.0, CH<sub>2</sub>Cl<sub>2</sub>); SFC condition: Lux 5u Amylose-1 (250 × 4.60 mm), CO<sub>2</sub>:MeOH = 80:20, 3 mL/min, 210 nm; *t<sub>R</sub>* = 4.2 min (minor), *t<sub>R</sub>* = 6.4 min (major). <sup>1</sup>H NMR (400 MHz, Chloroform-*d*) δ 7.87 – 7.82 (m, 2H), 7.66 – 7.62 (m, 1H), 7.55 – 7.51 (m, 2H), 7.21 (dddd, *J* = 9.0, 7.2, 5.1, 2.3 Hz, 1H), 7.08 – 7.03 (m, 2H), 7.01 – 6.97 (m, 1H), 3.67 (ddd, *J* = 14.0, 9.4, 4.6 Hz, 1H), 3.51 (s, 3H), 3.26 – 3.19 (m, 1H), 3.13 (dd, *J* = 14.2, 3.4 Hz, 1H), 2.97 – 2.94 (m, 2H). <sup>13</sup>C NMR (101 MHz, Chloroform-*d*) δ 172.6, 161.0 (d, *J* = 246.0 Hz), 138.7, 133.8, 131.1 (d, *J* = 4.3 Hz), 129.2, 129.1 (d, *J* = 8.2 Hz), 128.1, 124.2 (d, *J* = 3.8 Hz), 123.5 (d, *J* = 15.6 Hz), 115.5 (d, *J* = 21.9 Hz). TOF-HRMS Calcd. for C<sub>17</sub>H<sub>18</sub>FO<sub>4</sub>S [M+H<sup>+</sup>]: 337.0904, found 337.0901.

Methyl 2-(2-bromobenzyl)-3-(phenylsulfonyl)propanoate (**2p**)

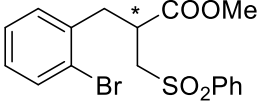 Purification by flash column chromatography (silica gel, PE:EA = 3:1) afforded the product as yellow oil; 45.7 mg, yield: 92%; 97% ee; [*α*]<sub>D</sub><sup>30</sup> = + 8.8 (*c* = 1.0, CH<sub>2</sub>Cl<sub>2</sub>); SFC condition: Lux 5u Amylose-2 (250 × 4.60 mm), CO<sub>2</sub>:MeOH = 80:20, 3 mL/min, 210 nm; *t<sub>R</sub>* = 5.7 min (minor), *t<sub>R</sub>* = 6.3 min (major). <sup>1</sup>H NMR (600 MHz, Chloroform-*d*) δ 7.85 – 7.83 (m, 2H), 7.65 – 7.63 (m, 1H),

7.54 – 7.51 (m, 2H), 7.47 (d,  $J = 1.3$  Hz, 1H), 7.20 (td,  $J = 7.5, 1.3$  Hz, 1H), 7.08 (ddd,  $J = 15.5, 7.7, 1.7$  Hz, 2H), 3.74 (dd,  $J = 14.4, 10.2$  Hz, 1H), 3.51 (s, 3H), 3.31 – 3.26 (m, 1H), 3.14 (dd,  $J = 14.4, 2.7$  Hz, 1H), 3.04 (dd,  $J = 13.7, 7.8$  Hz, 1H), 2.94 (dd,  $J = 13.7, 7.9$  Hz, 1H).  $^{13}\text{C}$  NMR (151 MHz, Chloroform- $d$ )  $\delta$  172.7, 138.6, 136.1, 133.8, 133.2, 131.0, 129.2, 128.9, 128.2, 127.6, 124.5, 56.5, 52.2, 40.3, 38.4. TOF-HRMS Calcd. for  $\text{C}_{17}\text{H}_{18}^{79}\text{BrO}_4\text{S}$  [ $\text{M}+\text{H}^+$ ]: 397.0104, found 397.0103; TOF-HRMS Calcd. for  $\text{C}_{17}\text{H}_{18}^{81}\text{BrO}_4\text{S}$  [ $\text{M}+\text{H}^+$ ]: 399.0090, found 399.0083.

Methyl 2-(3,4-dichlorobenzyl)-3-(phenylsulfonyl)propanoate (**2q**)

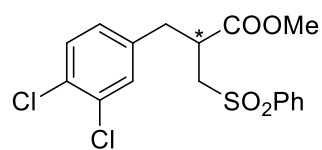

Purification by flash column chromatography (silica gel, PE:EA = 3:1) afforded the product as white solid; 45.5 mg, yield: 94%; 99.9% ee;  $[\alpha]_{\text{D}}^{30} = +13.6$  ( $c = 1.0$ ,  $\text{CH}_2\text{Cl}_2$ ); SFC condition: Lux 5u Amylose-1 ( $250 \times 4.60$  mm),  $\text{CO}_2:\text{MeOH} = 80:20$ , 3 mL/min, 210 nm;  $t_{\text{R}} = 5.9$  min (minor),  $t_{\text{R}} = 7.9$  min (major); m.p. 92-94 °C.  $^1\text{H}$  NMR (400 MHz, Chloroform- $d$ )  $\delta$  7.87 – 7.84 (m, 2H), 7.69 – 7.65 (m, 1H), 7.58 – 7.54 (m, 2H), 7.32 (d,  $J = 8.2$  Hz, 1H), 7.16 (d,  $J = 2.1$  Hz, 1H), 6.93 (dd,  $J = 8.2, 2.2$  Hz, 1H), 3.61 (dd,  $J = 14.1, 8.2$  Hz, 1H), 3.55 (s, 3H), 3.20 – 3.14 (m, 1H), 3.10 (dd,  $J = 14.1, 4.3$  Hz, 1H), 2.98 (dd,  $J = 13.8, 7.4$  Hz, 1H), 2.86 (dd,  $J = 13.8, 7.1$  Hz, 1H).  $^{13}\text{C}$  NMR (101 MHz, Chloroform- $d$ )  $\delta$  172.3, 138.6, 136.9, 134.1, 132.6, 131.3, 130.8, 130.6, 129.3, 128.3, 128.1, 56.1, 52.4, 41.4, 36.8. TOF-HRMS Calcd. for  $\text{C}_{17}\text{H}_{17}^{35}\text{Cl}_2\text{O}_4\text{S}$  [ $\text{M}+\text{H}^+$ ]: 387.0219, found 387.0215; TOF-HRMS Calcd. for  $\text{C}_{17}\text{H}_{17}^{37}\text{Cl}_2\text{O}_4\text{S}$  [ $\text{M}+\text{H}^+$ ]: 389.0189, found 389.0181.

Methyl 3-(naphthalen-2-yl)-2-((phenylsulfonyl)methyl)propanoate (**2r**)

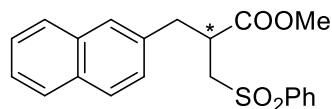

Purification by flash column chromatography (silica gel, PE:EA = 3:1) afforded the product as white solid; 43.3 mg, yield: 94%; 94% ee;  $[\alpha]_{\text{D}}^{30} = +10.5$  ( $c = 1.0$ ,  $\text{CH}_2\text{Cl}_2$ ); HPLC condition: Lux 5u Cellulose-2 ( $250 \times 4.60$  mm), ipa:hex = 50:50, 1 mL/min, 210 nm;  $t_{\text{R}} = 20.2$  min (major),  $t_{\text{R}} = 23.7$  min (minor); m.p. 98-100 °C.  $^1\text{H}$  NMR (400 MHz, Chloroform- $d$ )  $\delta$  7.83 – 7.79 (m, 3H), 7.75 – 7.72 (m, 1H), 7.63 – 7.59 (m, 1H), 7.51 – 7.45 (m, 5H), 7.17 (dd,  $J = 8.4, 1.8$  Hz, 1H), 3.69 (dd,  $J = 14.3, 9.2$  Hz, 1H), 3.54 (s, 3H), 3.34 – 3.27 (m, 1H),

3.23 – 3.15 (m, 2H), 2.99 (dd,  $J = 13.6, 7.9$  Hz, 1H).  $^{13}\text{C}$  NMR (151 MHz, Chloroform- $d$ )  $\delta$  172.9, 138.8, 134.0, 133.8, 133.3, 132.4, 129.2, 128.5, 128.1, 127.7, 127.6, 127.5, 126.7, 126.2, 125.8, 56.2, 52.2, 41.7, 38.1. TOF-HRMS Calcd. for  $\text{C}_{21}\text{H}_{21}\text{O}_4\text{S}$  [ $\text{M}+\text{H}^+$ ]: 369.1155, found 369.1154.

**Methyl 3-(phenylsulfonyl)-2-(thiophen-2-ylmethyl)propanoate (2s)**

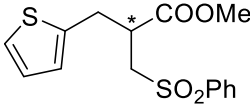 Purification by flash column chromatography (silica gel, PE:EA = 3:1) afforded the product as yellow oil; 38.9 mg, yield: 96%; 99.9% ee;  $[\alpha]_{\text{D}}^{30} = -3.4$  ( $c = 1.0$ ,  $\text{CH}_2\text{Cl}_2$ ); HPLC condition: Lux 5u Cellulose-2 (250  $\times$  4.60 mm), ipa:hex = 20:80, 1 mL/min, 210 nm;  $t_{\text{R}} = 36.2$  min (major),  $t_{\text{R}} = 39.8$  min (minor).  $^1\text{H}$  NMR (600 MHz, Chloroform- $d$ )  $\delta$  7.88 – 7.87 (m, 2H), 7.67 – 7.64 (m, 1H), 7.55 (t,  $J = 7.8$  Hz, 2H), 7.14 (dd,  $J = 5.1, 1.2$  Hz, 1H), 6.89 (dd,  $J = 5.1, 3.4$  Hz, 1H), 6.77 (dd,  $J = 3.5, 1.1$  Hz, 1H), 3.64 – 3.60 (m, 4H), 3.30 – 3.27 (m, 1H), 3.25 – 3.20 (m, 1H), 3.19 – 3.15 (m, 3H).  $^{13}\text{C}$  NMR (151 MHz, Chloroform- $d$ )  $\delta$  172.3, 138.9, 138.3, 133.9, 129.3, 128.1, 127.0, 126.7, 124.8, 55.7, 52.4, 41.8, 31.6. TOF-HRMS Calcd. for  $\text{C}_{15}\text{H}_{17}\text{O}_4\text{S}_2$  [ $\text{M}+\text{H}^+$ ]: 325.0563, found 325.0556.

**Methyl 3-(furan-2-yl)-2-((phenylsulfonyl)methyl)propanoate (2t)**

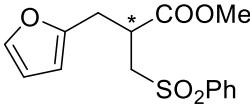 Purification by flash column chromatography (silica gel, PE:EA = 3:1) afforded the product as white solid; 37.4 mg, yield: 97%; 99.9% ee;  $[\alpha]_{\text{D}}^{30} = -6.2$  ( $c = 1.0$ ,  $\text{CH}_2\text{Cl}_2$ ); SFC condition: Lux 5u Cellulose-2 (250  $\times$  4.60 mm),  $\text{CO}_2$ :MeOH = 80:20, 3 mL/min, 210 nm;  $t_{\text{R}} = 4.1$  min (major),  $t_{\text{R}} = 5.0$  min (minor).  $^1\text{H}$  NMR (600 MHz, Chloroform- $d$ )  $\delta$  7.88 – 7.86 (m, 2H), 7.67 – 7.64 (m, 1H), 7.55 (t,  $J = 7.8$  Hz, 2H), 7.25 – 7.24 (m, 1H), 6.24 (dd,  $J = 3.2, 1.9$  Hz, 1H), 6.03 (dd,  $J = 3.2, 0.9$  Hz, 1H), 3.66 (dd,  $J = 14.4, 8.4$  Hz, 1H), 3.59 (s, 3H), 3.27 – 3.23 (m, 1H), 3.18 (dd,  $J = 14.4, 4.2$  Hz, 1H), 3.05 (dd,  $J = 15.1, 6.2$  Hz, 1H), 2.98 – 2.94 (m, 1H).  $^{13}\text{C}$  NMR (151 MHz, Chloroform- $d$ )  $\delta$  172.4, 150.4, 142.1, 138.8, 133.9, 129.3, 128.1, 110.2, 107.8, 56.0, 52.4, 39.4, 30.2. TOF-HRMS Calcd. for  $\text{C}_{15}\text{H}_{17}\text{O}_5\text{S}$  [ $\text{M}+\text{H}^+$ ]: 309.0791, found 309.0789.

**Methyl 3-(phenylsulfonyl)-2-(pyridin-3-ylmethyl)propanoate (2u)**

Purification by flash column chromatography (silica gel, PE:EA = 3:1) afforded the

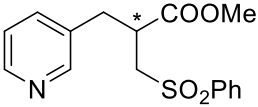
 product as pale yellow solid; 37.9 mg, yield: 95%; 98% ee;  $[\alpha]_D^{30} = +10.6$  ( $c = 1.0$ ,  $\text{CH}_2\text{Cl}_2$ ); HPLC condition: Lux 5u Cellulose-2 ( $250 \times 4.60$  mm), ipa:hex = 20:80, 1 mL/min, 210 nm;  $t_R = 23.9$  min (major),  $t_R = 26.0$  min (minor); m.p. 68-70 °C.  $^1\text{H}$  NMR (400 MHz, Chloroform- $d$ )  $\delta$  8.48 (s, 1H), 8.35 (s, 1H), 7.88 – 7.83 (m, 2H), 7.67 – 7.63 (m, 1H), 7.57 – 7.52 (m, 2H), 7.48 (d,  $J = 7.7$  Hz, 1H), 7.24 (dt,  $J = 8.8, 5.1$  Hz, 1H), 3.61 (dd,  $J = 14.1, 8.1$  Hz, 1H), 3.51 (s, 3H), 3.26 – 3.19 (m, 1H), 3.12 (dd,  $J = 14.2, 4.6$  Hz, 1H), 2.99 (qd,  $J = 14.0, 7.3$  Hz, 2H).  $^{13}\text{C}$  NMR (101 MHz, Chloroform- $d$ )  $\delta$  172.2, 149.7, 148.1, 138.7, 136.9, 134.1, 132.6, 129.4, 128.1, 123.7, 56.3, 52.4, 41.3, 34.8. TOF-HRMS Calcd. for  $\text{C}_{16}\text{H}_{18}\text{NO}_4\text{S}$   $[\text{M}+\text{H}^+]$ : 320.0951, found 320.0947.

Methyl 4-methyl-2-((phenylsulfonyl)methyl)pentanoate (**2v**)

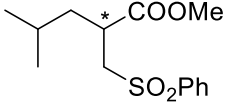
 Purification by flash column chromatography (silica gel, PE:EA = 3:1) afforded the product as yellow oil; 5.3 mg, yield: 15%; 95% ee;  $[\alpha]_D^{30} = -32.9$  ( $c = 1.0$ ,  $\text{CH}_2\text{Cl}_2$ ); SFC condition: Lux 5u Amylose-1 ( $250 \times 4.60$  mm),  $\text{CO}_2$ :MeOH = 80:20, 3 mL/min, 210 nm;  $t_R = 3.3$  min (minor),  $t_R = 3.8$  min (major).  $^1\text{H}$  NMR (600 MHz, Chloroform- $d$ )  $\delta$  7.91 – 7.89 (m, 2H), 7.67 – 7.64 (m, 1H), 7.58 – 7.55 (m, 2H), 3.64 (dd,  $J = 14.3, 10.0$  Hz, 1H), 3.57 (s, 3H), 3.08 (dd,  $J = 14.3, 2.9$  Hz, 1H), 2.99 – 2.95 (m, 1H), 1.55 (ddd,  $J = 13.1, 8.6, 6.2$  Hz, 1H), 1.51 – 1.45 (m, 1H), 1.32 (ddd,  $J = 13.2, 7.8, 6.6$  Hz, 1H), 0.88 (d,  $J = 6.5$  Hz, 3H), 0.82 (d,  $J = 6.5$  Hz, 3H).  $^{13}\text{C}$  NMR (151 MHz, Chloroform- $d$ )  $\delta$  173.9, 138.9, 133.9, 129.2, 128.2, 57.8, 52.1, 41.6, 38.3, 25.7, 22.3, 21.8. TOF-HRMS Calcd. for  $\text{C}_{14}\text{H}_{21}\text{O}_4\text{S}$   $[\text{M}+\text{H}^+]$ : 285.1155, found 285.1152.

Methyl 2-benzyl-3-tosylpropanoate (**4a**)

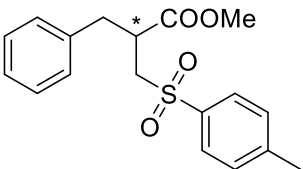
 Purification by flash column chromatography (silica gel, PE:EA = 3:1) afforded the product as white solid; 40.7 mg, yield: 98%; 98% ee;  $[\alpha]_D^{30} = +4.9$  ( $c = 1.0$ ,  $\text{CH}_2\text{Cl}_2$ ); HPLC condition: Lux 5u Cellulose-2 ( $250 \times 4.60$  mm), ipa:hex = 20:80, 1 mL/min, 210 nm;  $t_R = 38.5$  min (major),  $t_R = 45.6$  min (minor); m.p. 85-87 °C.  $^1\text{H}$  NMR (600 MHz, Chloroform- $d$ )  $\delta$  7.72 – 7.71 (m, 2H), 7.33 – 7.31 (m, 2H), 7.26 –

7.21 (m, 3H), 7.06 – 7.04 (m, 2H), 3.63 – 3.59 (m, 1H), 3.54 (s, 3H), 3.21 – 3.16 (m, 1H), 3.10 (dd,  $J = 14.3, 3.6$  Hz, 1H), 3.02 (dd,  $J = 13.8, 7.1$  Hz, 1H), 2.83 (dd,  $J = 13.8, 7.8$  Hz, 1H), 2.44 (s, 3H).  $^{13}\text{C}$  NMR (151 MHz, Chloroform-*d*)  $\delta$  172.9, 144.8, 136.6, 136.0, 129.8, 128.9, 128.7, 128.2, 127.1, 56.4, 52.1, 41.8, 38.0, 21.6. TOF-HRMS Calcd. for  $\text{C}_{18}\text{H}_{21}\text{O}_4\text{S}$  [ $\text{M}+\text{H}^+$ ]: 333.1155, found 333.1148.

Methyl 2-benzyl-3-((4-fluorophenyl)sulfonyl)propanoate (**4b**)

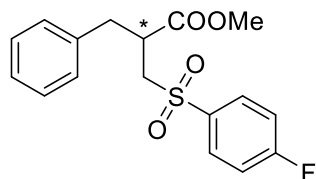

Purification by flash column chromatography (silica gel, PE:EA = 3:1) afforded the product as pale yellow oil; 39.9 mg, yield: 95%; 97% ee;  $[\alpha]_{\text{D}}^{30} = -3.3$  ( $c = 1.0$ ,  $\text{CH}_2\text{Cl}_2$ ); SFC condition: Lux 5u Amylose-1 ( $250 \times 4.60$  mm),  $\text{CO}_2:\text{MeOH} = 80:20$ , 3 mL/min, 210 nm;  $t_{\text{R}} = 3.0$  min (minor),  $t_{\text{R}} = 4.2$  min (major).  $^1\text{H}$  NMR (400 MHz, Chloroform-*d*)  $\delta$  7.86 – 7.82 (m, 2H), 7.28 – 7.18 (m, 5H), 7.06 – 7.03 (m, 2H), 3.64 (dd,  $J = 14.1, 9.3$  Hz, 1H), 3.56 (s, 3H), 3.20 – 3.08 (m, 2H), 3.03 (dd,  $J = 13.7, 6.7$  Hz, 1H), 2.81 (dd,  $J = 13.7, 7.9$  Hz, 1H).  $^{13}\text{C}$  NMR (101 MHz, Chloroform-*d*)  $\delta$  172.8, 165.8 (d,  $J = 256.8$  Hz), 136.3, 134.8 (d,  $J = 3.2$  Hz), 131.0 (d,  $J = 9.7$  Hz), 128.8, 128.7, 127.2, 116.5 (d,  $J = 22.6$  Hz), 56.3, 52.2, 41.8, 38.0. TOF-HRMS Calcd. for  $\text{C}_{17}\text{H}_{18}\text{FO}_4\text{S}$  [ $\text{M}+\text{H}^+$ ]: 337.0904, found 337.0898.

Methyl 2-benzyl-3-((4-chlorophenyl)sulfonyl)propanoate (**4c**)

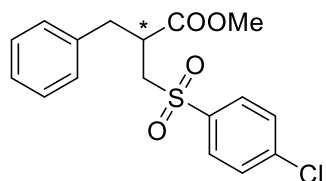

Purification by flash column chromatography (silica gel, PE:EA = 3:1) afforded the product as pale yellow solid; 42.8 mg, yield: 97%; 96% ee;  $[\alpha]_{\text{D}}^{30} = +6.9$  ( $c = 1.0$ ,  $\text{CH}_2\text{Cl}_2$ ); HPLC condition: Lux 5u Cellulose-2 ( $250 \times 4.60$  mm), ipa:hex = 20:80, 1 mL/min, 210 nm;  $t_{\text{R}} = 20.9$  min (minor),  $t_{\text{R}} = 22.5$  min (major); m.p. 64–66 °C.  $^1\text{H}$  NMR (600 MHz, Chloroform-*d*)  $\delta$  7.77 – 7.74 (m, 2H), 7.50 – 7.48 (m, 2H), 7.27 – 7.22 (m, 3H), 7.05 – 7.03 (m, 2H), 3.64 (dd,  $J = 14.3, 9.3$  Hz, 1H), 3.56 (s, 3H), 3.18 – 3.15 (m, 1H), 3.10 (dd,  $J = 14.3, 3.3$  Hz, 1H), 3.04 (dd,  $J = 13.7, 6.8$  Hz, 1H), 2.81 (dd,  $J = 13.7, 8.1$  Hz, 1H).  $^{13}\text{C}$  NMR (151 MHz, Chloroform-*d*)  $\delta$  172.8, 140.6, 137.3, 136.3, 129.6, 129.5, 128.8, 128.7, 127.2, 56.2, 52.2, 41.8, 38.0. TOF-HRMS Calcd. for  $\text{C}_{17}\text{H}_{18}^{35}\text{ClO}_4\text{S}$  [ $\text{M}+\text{H}^+$ ]: 353.0609, found 353.0603; TOF-HRMS

Calcd. for  $C_{17}H_{18}^{37}ClO_4S$   $[M+H^+]$ : 355.0582, found 353.0577.

Methyl 2-benzyl-3-(methylsulfonyl)propanoate (**4d**)

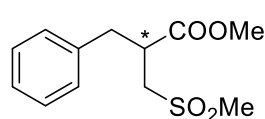

Purification by flash column chromatography (silica gel, PE:EA = 3:1) afforded the product as yellow oil; 31.7 mg, yield: 99%; 99.6% ee;  $[\alpha]_D^{30} = +12.0$  ( $c = 1.0$ ,  $CH_2Cl_2$ ); SFC condition: Lux

5u Amylose-1 ( $250 \times 4.60$  mm),  $CO_2:MeOH = 80:20$ , 3 mL/min, 210 nm;  $t_R = 5.2$  min (minor),  $t_R = 8.2$  min (major).  $^1H$  NMR (400 MHz, Chloroform-*d*)  $\delta$  7.32 – 7.22 (m, 3H), 7.16 – 7.13 (m, 2H), 3.69 (d,  $J = 2.5$  Hz, 3H), 3.57 – 3.51 (m, 1H), 3.36 – 3.29 (m, 1H), 3.13 – 3.00 (m, 1H), 3.02 (dt,  $J = 14.2, 3.0$  Hz, 1H), 2.92 – 2.83 (m, 4H).  $^{13}C$  NMR (101 MHz, Chloroform-*d*)  $\delta$  173.2, 136.4, 128.9, 128.7, 127.2, 54.8, 52.3, 41.5, 41.4, 37.8. TOF-HRMS Calcd. for  $C_{12}H_{17}O_4S$   $[M+H^+]$ : 257.0842, found 257.0837.

Methyl (Z)-2-((*tert*-butylsulfonyl)methyl)-3-phenylacrylate (**4e**)

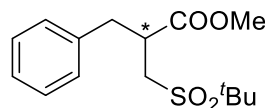

Purification by flash column chromatography (silica gel, PE:EA = 3:1) afforded the product as yellow solid; 44.2 mg, yield: 98%;

97% ee;  $[\alpha]_D^{30} = -2.8$  ( $c = 1.0$ ,  $CH_2Cl_2$ ); SFC condition: Lux 5u Amylose-1 ( $250 \times 4.60$  mm),  $CO_2:MeOH = 80:20$ , 3 mL/min, 210 nm;  $t_R = 2.2$  min (major),  $t_R = 3.0$  min (minor); m.p. 79-80 °C.  $^1H$  NMR (600 MHz, Chloroform-*d*)  $\delta$  7.31 – 7.29 (m, 1H), 7.25 – 7.22 (m, 1H), 7.18 – 7.16 (m, 2H), 3.66 (s, 3H), 3.47 – 3.39 (m, 2H), 3.11 (dd,  $J = 13.7, 6.7$  Hz, 1H), 3.00 – 2.94 (m, 2H), 1.36 (s, 9H).  $^{13}C$  NMR (151 MHz, Chloroform-*d*)  $\delta$  173.5, 136.9, 129.0, 128.6, 127.0, 59.3, 52.2, 45.8, 40.0, 37.9, 23.2. The analytical data are consistent with the literature.<sup>16</sup>

Methyl 2-benzyl-3-phenoxypropanoate (**4f**)

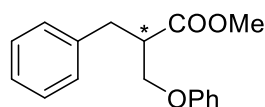

Purification by flash column chromatography (silica gel, PE:EA = 3:1) afforded the product as yellow oil; 32.4 mg, yield: 96%;

94% ee;  $[\alpha]_D^{30} = -16.5$  ( $c = 1.0$ ,  $CH_2Cl_2$ ); SFC condition: Lux 5u Amylose-1 ( $250 \times 4.60$  mm),  $CO_2:MeOH = 95:5$ , 3 mL/min, 210 nm;  $t_R = 5.2$  min (minor),  $t_R = 5.5$  min (major).  $^1H$  NMR (600 MHz, Chloroform-*d*)  $\delta$  7.31 – 7.27 (m, 4H), 7.25 – 7.22 (m, 1H), 7.21 – 7.19 (m, 2H), 6.97 (tt,  $J = 7.4, 1.1$  Hz, 1H), 6.90 – 6.88 (m, 2H), 4.16 (dd,  $J = 9.1, 6.6$  Hz, 1H), 4.07 (dd,  $J = 9.2, 5.3$  Hz, 1H), 3.69 (s, 3H), 3.19 – 3.10 (m, 2H), 3.02



(dd,  $J = 13.6, 7.4$  Hz, 1H).  $^{13}\text{C}$  NMR (151 MHz, Chloroform- $d$ )  $\delta$  173.5, 158.5, 138.3, 129.4, 129.0, 128.5, 126.6, 121.0, 114.6, 67.2, 51.8, 47.1, 34.5. TOF-HRMS Calcd. for  $\text{C}_{17}\text{H}_{19}\text{O}_3$   $[\text{M}+\text{H}^+]$ : 271.1329, found 271.1323.

**Ethyl 2-benzyl-3-(phenylsulfonyl)propanoate (4g)**

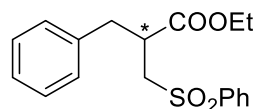

Purification by flash column chromatography (silica gel, PE:EA = 3:1) afforded the product as yellow oil; 39.9 mg, yield: 96%; 98% ee;  $[\alpha]_{\text{D}}^{30} = +3.6$  ( $c = 1.0$ ,  $\text{CH}_2\text{Cl}_2$ ); HPLC condition: Lux 5u Amylose-1 ( $250 \times 4.60$  mm), ipa:hex = 5:95, 1 mL/min, 210 nm;  $t_{\text{R}} = 36.9$  min (minor),  $t_{\text{R}} = 39.1$  min (major).  $^1\text{H}$  NMR (600 MHz, Chloroform- $d$ )  $\delta$  7.84 – 7.83 (m, 2H), 7.63 (t,  $J = 7.4$  Hz, 1H), 7.52 (t,  $J = 7.8$  Hz, 2H), 7.25 – 7.18 (m, 3H), 7.06 – 7.04 (m, 2H), 3.95 (qd,  $J = 7.1, 1.4$  Hz, 2H), 3.64 (dd,  $J = 14.3, 9.1$  Hz, 1H), 3.19 – 3.14 (m, 1H), 3.11 (dd,  $J = 14.3, 3.5$  Hz, 1H), 3.00 (dd,  $J = 13.7, 7.2$  Hz, 1H), 2.83 (dd,  $J = 13.7, 7.8$  Hz, 1H), 1.10 (t,  $J = 7.1$  Hz, 3H).  $^{13}\text{C}$  NMR (151 MHz, Chloroform- $d$ )  $\delta$  172.3, 138.8, 136.5, 133.7, 129.1, 128.8, 128.5, 128.0, 126.9, 61.1, 56.2, 41.7, 38.0, 13.8. TOF-HRMS Calcd. for  $\text{C}_{18}\text{H}_{21}\text{O}_4\text{S}$   $[\text{M}+\text{H}^+]$ : 333.1155, found 333.1148.

***Tert*-butyl 2-benzyl-3-(phenylsulfonyl)propanoate (4h)**

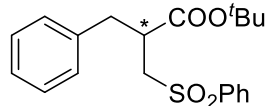

Purification by flash column chromatography (silica gel, PE:EA = 3:1) afforded the product as white solid; 42.8 mg, yield: 95%; 97% ee;  $[\alpha]_{\text{D}}^{30} = -9.0$  ( $c = 1.0$ ,  $\text{CH}_2\text{Cl}_2$ ); SFC condition: Lux 5u Amylose-1 ( $250 \times 4.60$  mm),  $\text{CO}_2$ :MeOH = 80:20, 3 mL/min, 210 nm;  $t_{\text{R}} = 5.7$  min (minor),  $t_{\text{R}} = 7.3$  min (major); m.p. 88-89 °C.  $^1\text{H}$  NMR (400 MHz, Chloroform- $d$ )  $\delta$  7.87 – 7.84 (m, 2H), 7.66 – 7.62 (m, 1H), 7.56 – 7.51 (m, 2H), 7.26 – 7.18 (m, 3H), 7.08 – 7.06 (m, 2H), 3.66 – 3.59 (m, 1H), 3.12 – 3.04 (m, 2H), 2.97 (dd,  $J = 13.7, 7.2$  Hz, 1H), 2.82 (dd,  $J = 13.7, 7.4$  Hz, 1H), 1.32 (s, 9H).  $^{13}\text{C}$  NMR (101 MHz, Chloroform- $d$ )  $\delta$  171.5, 139.1, 136.7, 133.7, 129.2, 129.0, 128.5, 128.0, 126.9, 81.7, 56.4, 42.2, 38.2, 27.7. TOF-HRMS Calcd. for  $\text{C}_{20}\text{H}_{25}\text{O}_4\text{S}$   $[\text{M}+\text{H}^+]$ : 361.1468, found 361.1463.

**2-Benzyl-3-(phenylsulfonyl)propanoic acid (4i)**

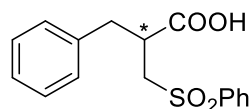

Purification by flash column chromatography (silica gel, PE:EA = 3:1) afforded the product as colorless oil; 35.8 mg, yield: 94%;

96% ee;  $[\alpha]_D^{30} = -3.0$  ( $c = 1.0$ ,  $\text{CH}_2\text{Cl}_2$ ).  $^1\text{H}$  NMR (600 MHz,  $\text{CHCl}_3$ )  $\delta$  11.97 (br s, 1H), 7.45 – 7.42 (m, 2H), 7.31 – 7.29 (m, 3H), 7.24 – 7.19 (m, 5H), 3.09 (dd,  $J = 13.5, 6.5$  Hz, 2H), 2.79 – 2.78 (m, 1H), 2.68 (dd,  $J = 13.5, 8.1$  Hz, 2H). The analytical data are consistent with the literature.<sup>14</sup> The product **4i** was dissolved in  $\text{CH}_2\text{Cl}_2$ , followed by addition of aniline, EDC, and DMAP at 0 °C, and stirred for 4 h. The corresponding amide was purified by chromatography. SFC condition: Lux 5u Cellulose-1 (250 × 4.60 mm),  $\text{CO}_2$ :MeOH = 80:20, 3 mL/min, 254 nm;  $t_R = 7.0$  min (major),  $t_R = 9.6$  min (minor).

#### 2-Benzyl-3-(phenylsulfonyl)propanoic acid (**4i'**)

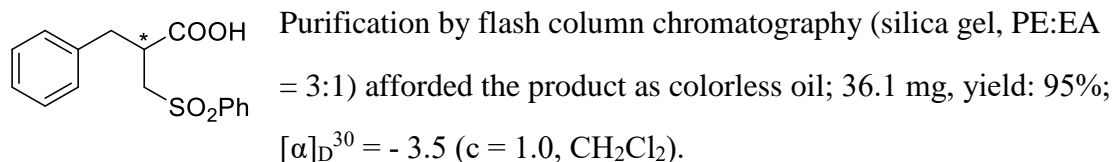

#### 2-Benzyl-N-phenyl-3-(phenylsulfonyl)propenamide (**4j**)

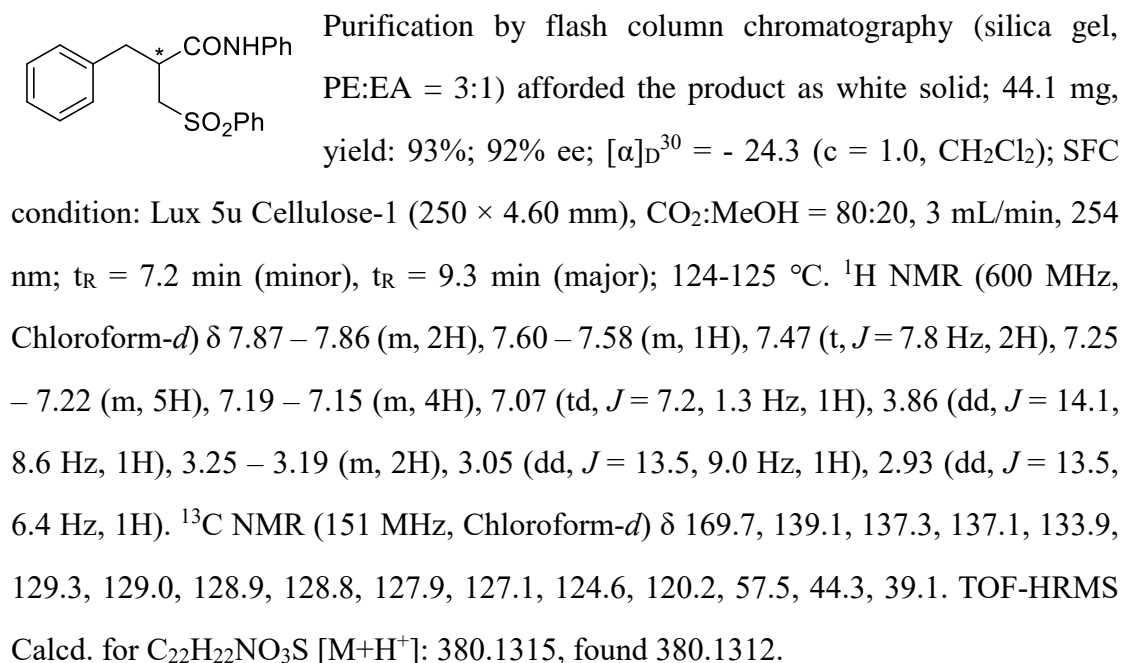

#### 2-Benzyl-N-phenyl-3-(phenylsulfonyl)propenamide (**4j'**)

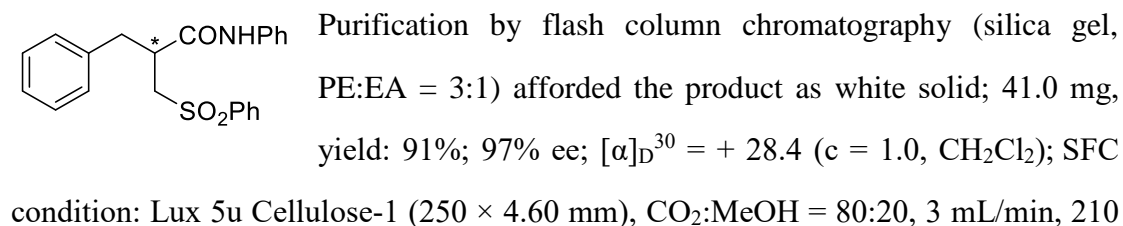

nm;  $t_R = 7.1$  min (major),  $t_R = 9.5$  min (minor).

Methyl 2-methyl-3-phenylpropanoate (**4k**)

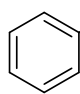

Purification by flash column chromatography (silica gel, PE:EA = 10:1) afforded the product as yellow oil; 21.2 mg, yield: 95%; 99% ee;  $[\alpha]_D^{30} = -16.9$  ( $c = 1.0$ ,  $\text{CH}_2\text{Cl}_2$ ); SFC condition: Lux 5u Cellulose-3 ( $250 \times 4.60$  mm),  $\text{CO}_2$ :MeOH = 95:5, 3 mL/min, 210 nm;  $t_R = 1.8$  min (minor),  $t_R = 1.9$  min (major).  $^1\text{H}$  NMR (600 MHz, Chloroform- $d$ )  $\delta$  7.30 – 7.27 (m, 2H), 7.23 – 7.20 (m, 1H), 7.18 – 7.16 (m, 2H), 3.64 (s, 3H), 3.04 (dd,  $J = 13.4, 6.8$  Hz, 1H), 2.78 – 2.72 (m, 1H), 2.67 (dd,  $J = 13.4, 7.8$  Hz, 1H), 1.16 (d,  $J = 6.9$  Hz, 3H). The analytical data are consistent with the literature.<sup>17</sup>

## 6. References

- (1) A. Dahiya, W. Ali, T. Alam and B. K. Patel, A cascade synthesis of *S*-allyl benzoylcarbamothioates *via* Mumm-type rearrangement, *Org. Biomol. Chem.*, 2018, **16**, 7787–7791.
- (2) R. Zhou, S. Fan, L. Fang, B. Chu and J. Zhu, Rh(III)-Catalyzed N-Amino-Directed C–H Coupling with 3-Methyleneoxetan-2-ones for 1,2-Dihydroquinoline-3-carboxylic Acid Synthesis, *Org. Lett.*, 2023, **25**, 8688–8692.
- (3) A. Bouzide, Magnesium Bromide Mediated Highly Diastereoselective Heterogeneous Hydrogenation of Olefins, *Org. Lett.*, 2002, **4**, 1347–1350.
- (4) D. R. Nicponski and P. V. Ramachandran, Alkylthialactonization: A novel protocol for access to either diastereoisomer of  $\alpha$ -(thiomethyl)- $\gamma$ -butyrolactones, *Tetrahedron Lett.*, 2023, **124**, 154605.
- (5) P. Xie, J. Wang, Y. Liu, J. Fan, X. Wo, W. Fu, Z. Sun and T.-P. Loh, Water-promoted C-S bond formation reactions, *Nat. Commun.*, 2018, **9**, 1321.
- (6) Z. He, B. Wibbeling and A. Studera, Oxidative Heck Coupling of Allylic Amines with 2,2,6,6-Tetramethylpiperidine-*N*-oxyl (TEMPO) as Oxidant for the Preparation of Tetrasubstituted Alkenes, *Adv. Synth. Catal.*, 2013, **355**, 3639–3647.
- (7) Z.-Y. Li, S. Song, S.-F. Zhu, N. Guo, L.-X. Wang and Q.-L. Zhou, Synthesis of Chiral  $\alpha$ -Benzyl- $\beta^2$ -hydroxy Carboxylic Acids through Iridium-Catalyzed Asymmetric Hydrogenation of  $\alpha$ -Oxymethylcinnamic Acids, *Chin. J. Chem.*, 2014, **32**, 783–787.
- (8) E. H. Demont, C. W. Chung, R. C. Furze, P. Grandi, A.-M. Michon, C. Wellaway, N. Barrett, A. M. Bridges, P. D. Craggs, H. Diallo, D. P. Dixon, C. Douault, A. J. Emmons, E. J. Jones, B. V. Karamshi, K. Locke, D. J. Mitchell, B. H. Mouzon, R. K. Prinjha, A. D. Roberts, R. J. Sheppard, R. J. Watson and Bamborough, P. Fragment-Based Discovery of Low-Micromolar ATAD2 Bromodomain Inhibitors, *J. Med. Chem.*, 2015, **58**, 5649–5673.
- (9) Z.-G. Wang, L. Chen, J. Chen, J.-F. Zheng, W. Gao, Z. Zeng, H. Zhou, X.-k. Zhang, P.-Q. Huang and Y. Su, Synthesis and SAR study of modulators inhibiting tRXR $\alpha$ -dependent AKT activation. *Eur. J. Med. Chem.* 2013, **62**, 632-648.

- (10) X. Yao, Z. Li, H. Mei, J. Escorihuela, V. A. Soloshonok and J. Han, Cascade Detrifuoroacetylation, C–S Bond Cleavage, and  $S_N2'$  Reaction of  $\alpha,\alpha$ -Difluorinated Gem-Diols with MBH Esters, *J. Org. Chem.*, 2023, **88**, 13057–13066.
- (11) L. Jiang, Y.-G. Li, J.-F. Zhou, Y.-M. Chuan, H.-L. Li and M.-L. Yuan, A Facile and Mild Synthesis of Trisubstituted Allylic Sulfones from Morita-Baylis-Hillman Carbonates, *Molecules*, 2015, **20**, 8213–8222.
- (12) Q. Wang, S. Sheng, S. Lin, L. Guo, M. Wei and X. Huang, Liquid-Phase Synthesis of Methyl (2Z)-2-Arylsulfonylmethyl-2-alkenoates from PEG-Supported  $\alpha$ -Phenylselenopropionate, *Chin. J. Chem.*, 2007, **25**, 1027–1030.
- (13) J.-B. Baudin and S. Julia, Unsaturated sulfinamides. XII. Substituted 4-(2-alkenesulfinyl)morpholines: preparation and conversion into the corresponding sulfinic acids and esters. Stereochemistry of olefin formation by hydrolytic desulfinylation of allylic sulfinamides, *Bull. Soc. Chim. Fr.*, 1995, **132**, 196–214.
- (14) S. Senapati, S. K. Parida, S. S. Karandikar, and S. Murarka, Organophotoredox-Catalyzed Arylation and Aryl Sulfonylation of Morita–Baylis–Hillman Acetates with Diaryliodonium Reagents, *Org. Lett.*, 2023, **25**, 7900–7905.
- (15) K. Masao, Y. Yoshifumi, H. Mutsumi, M. Takashi and K. Hidenori, Preparation of 3-thio-2-benzylpropionic acids and their intermediates *via* catalyzed asymmetric hydrogenation, JP06172300 A, 1994.
- (16) H. L. Sham and S. H. Rosenberg, Preparation of renin-inhibiting difluorodiol-containing peptides, EP416393 A1, 1991.
- (17) J. M. Stevens, A. C. Parra-Rivera, D. D. Dixon, G. L. Beutner, A. J. DelMonte, D. E. Frantz, J. M. Janey, J. Paulson and M. R. Talley, Direct Lewis Acid Catalyzed Conversion of Enantioenriched *N*-Acyloxazolidinones to Chiral Esters, Amides, and Acids. *J. Org. Chem.*, 2018, **83**, 14245–14261.

## 7. NMR, SFC and HPLC spectra

### Methyl (Z)-3-phenyl-2-((phenylsulfonyl)methyl)acrylate (**1a**)

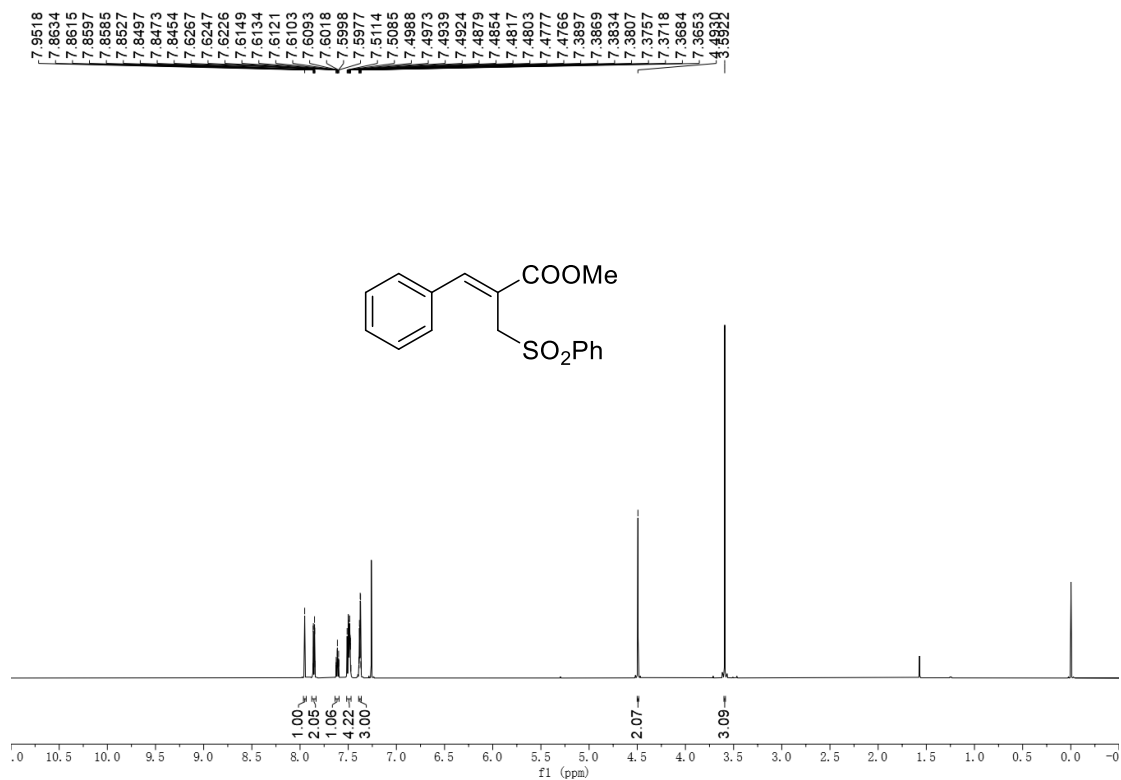

<sup>1</sup>H NMR (600 MHz, Chloroform-*d*)

Methyl (Z)-2-((phenylsulfonyl)methyl)-3-(*p*-tolyl)acrylate (**1b**)

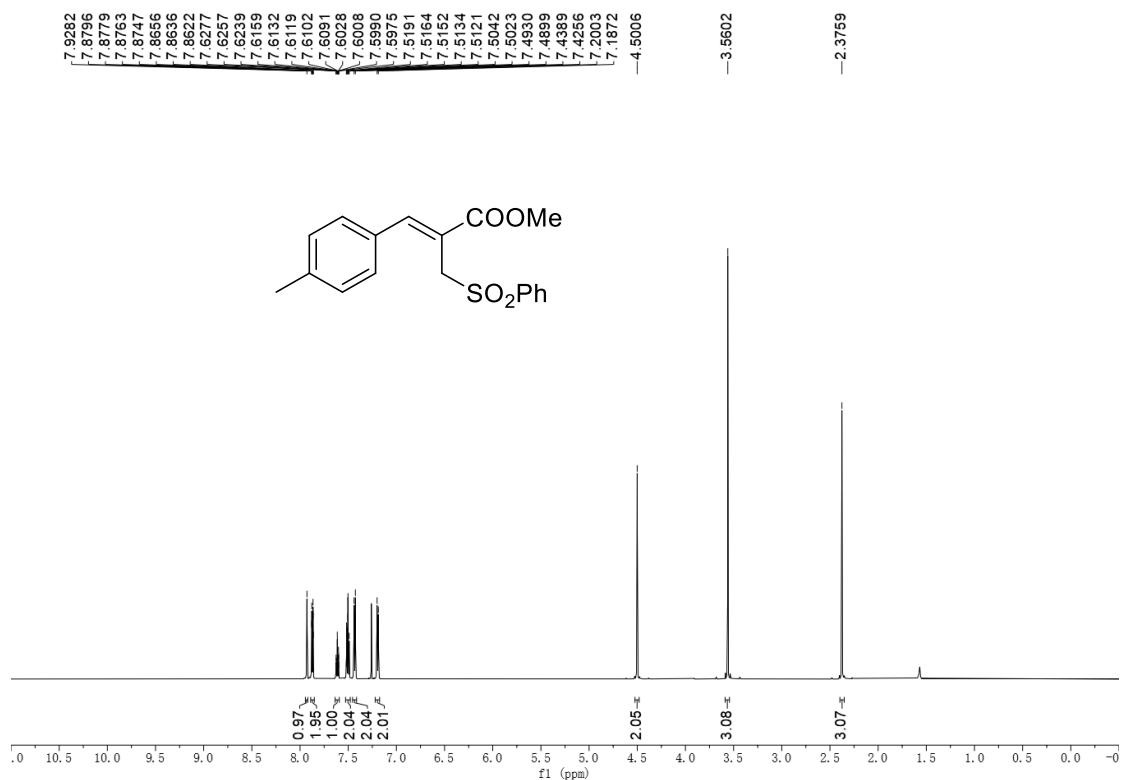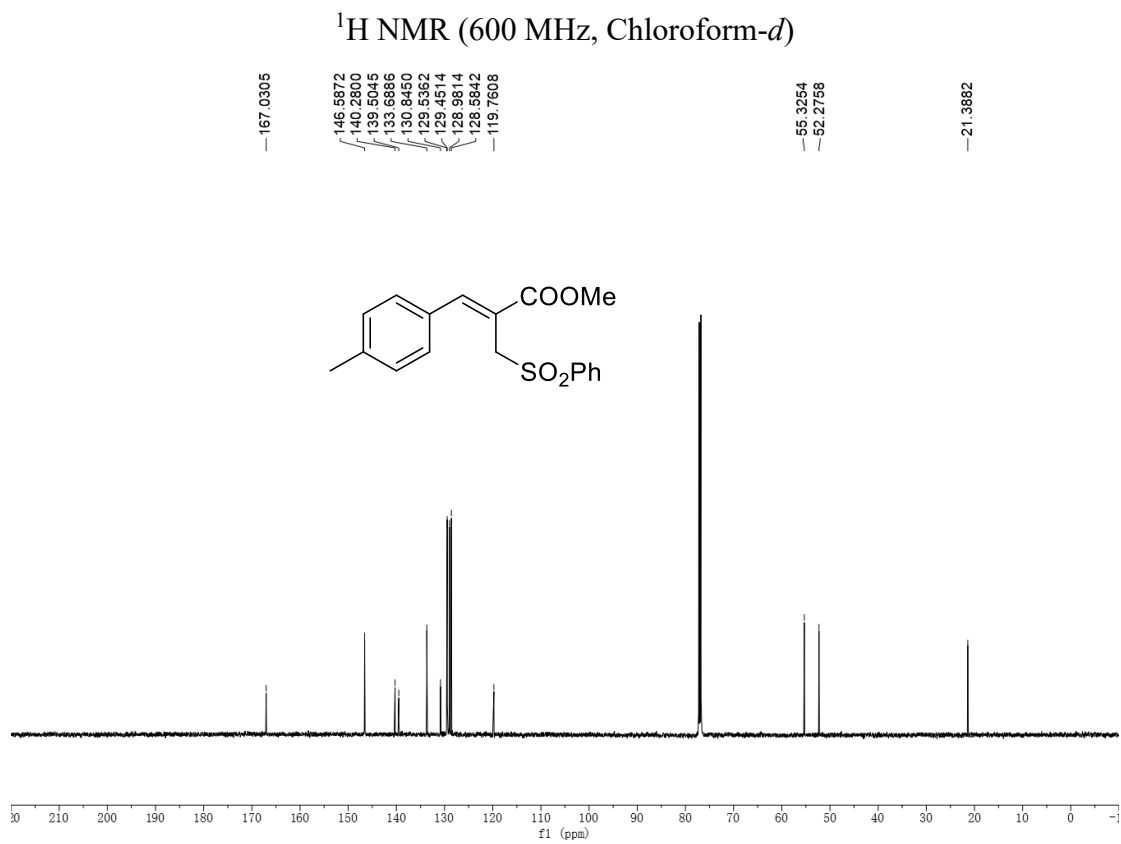

Methyl (Z)-3-(4-methoxyphenyl)-2-((phenylsulfonyl)methyl)acrylate (**1c**)

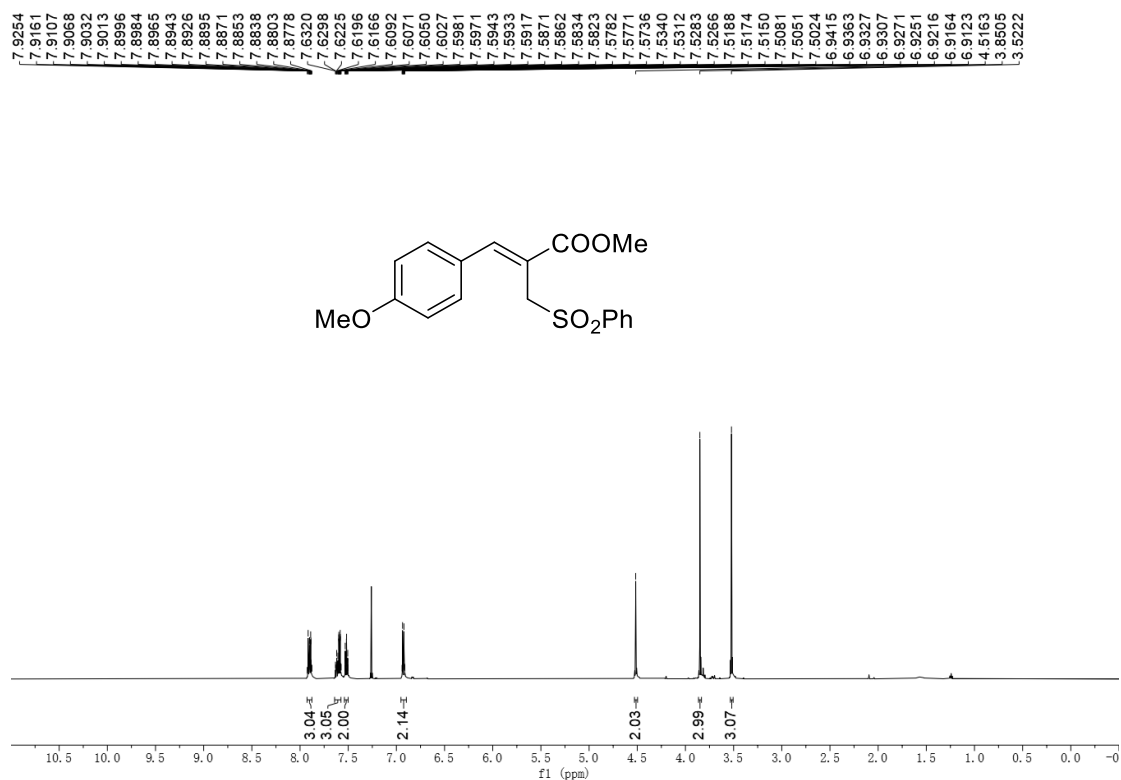

<sup>1</sup>H NMR (600 MHz, Chloroform-*d*)

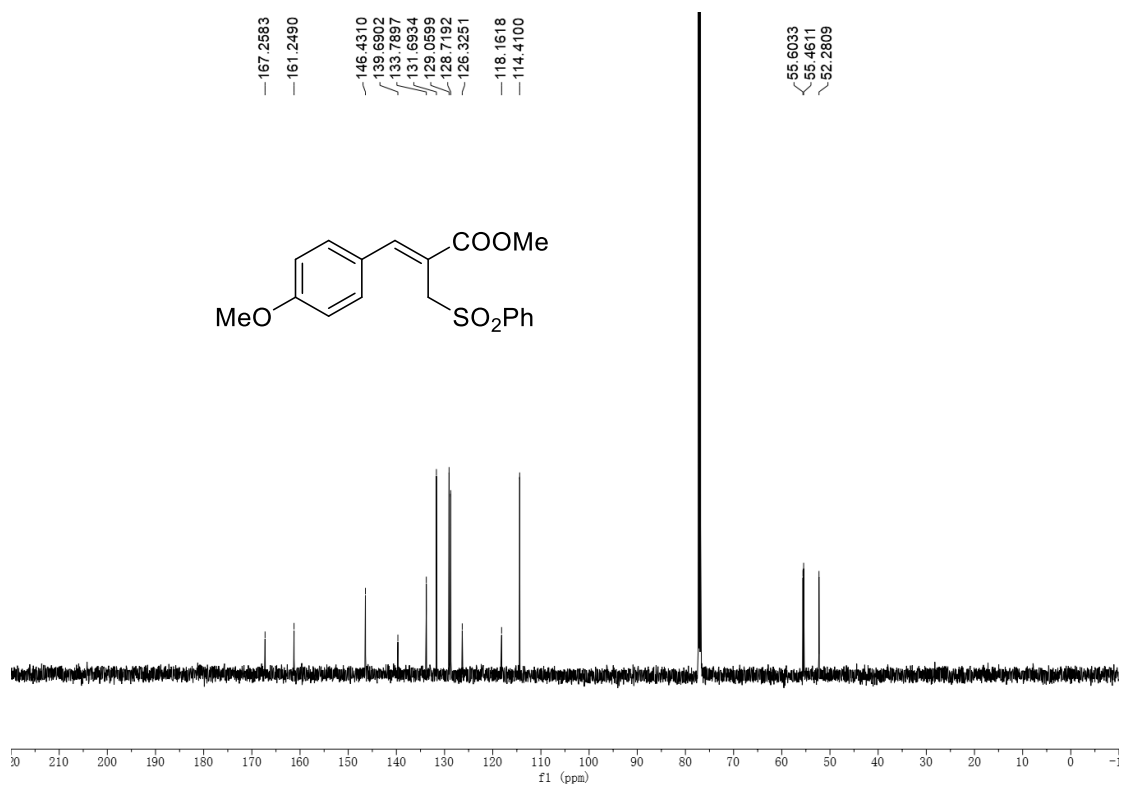

<sup>13</sup>C NMR (151 MHz, Chloroform-*d*)



Methyl (Z)-3-(4-(benzyloxy)phenyl)-2-((phenylsulfonyl)methyl)acrylate (**1d**)

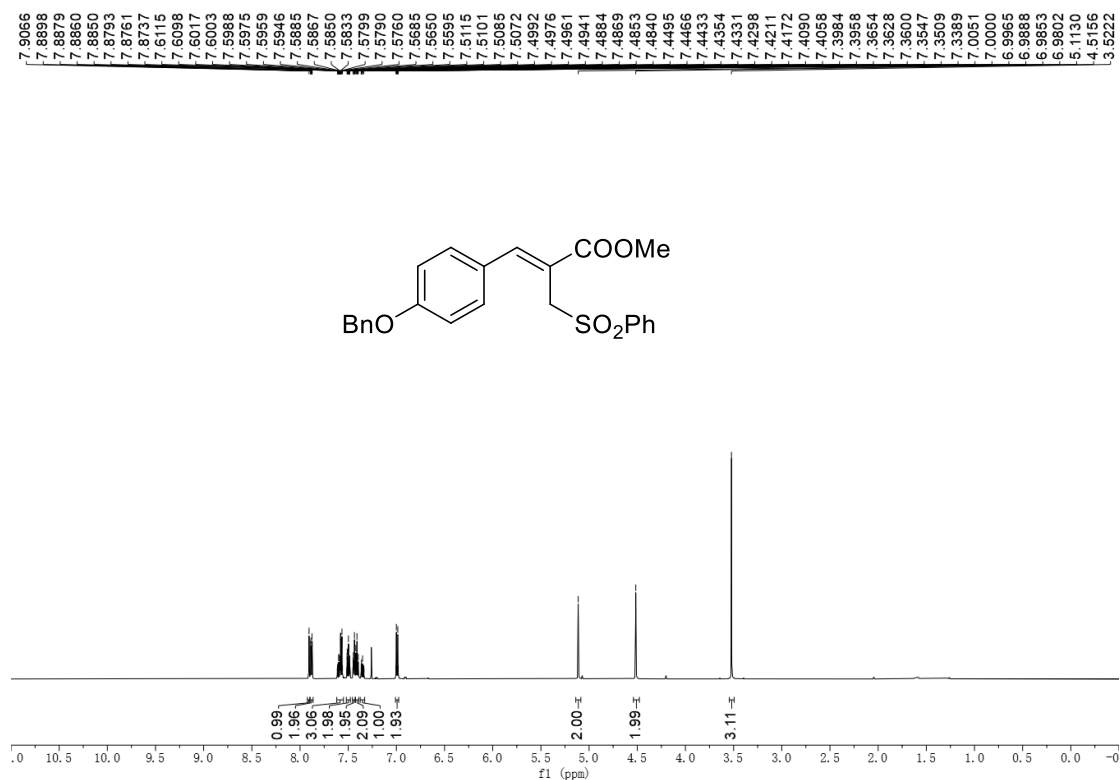

<sup>1</sup>H NMR (600 MHz, Chloroform-*d*)

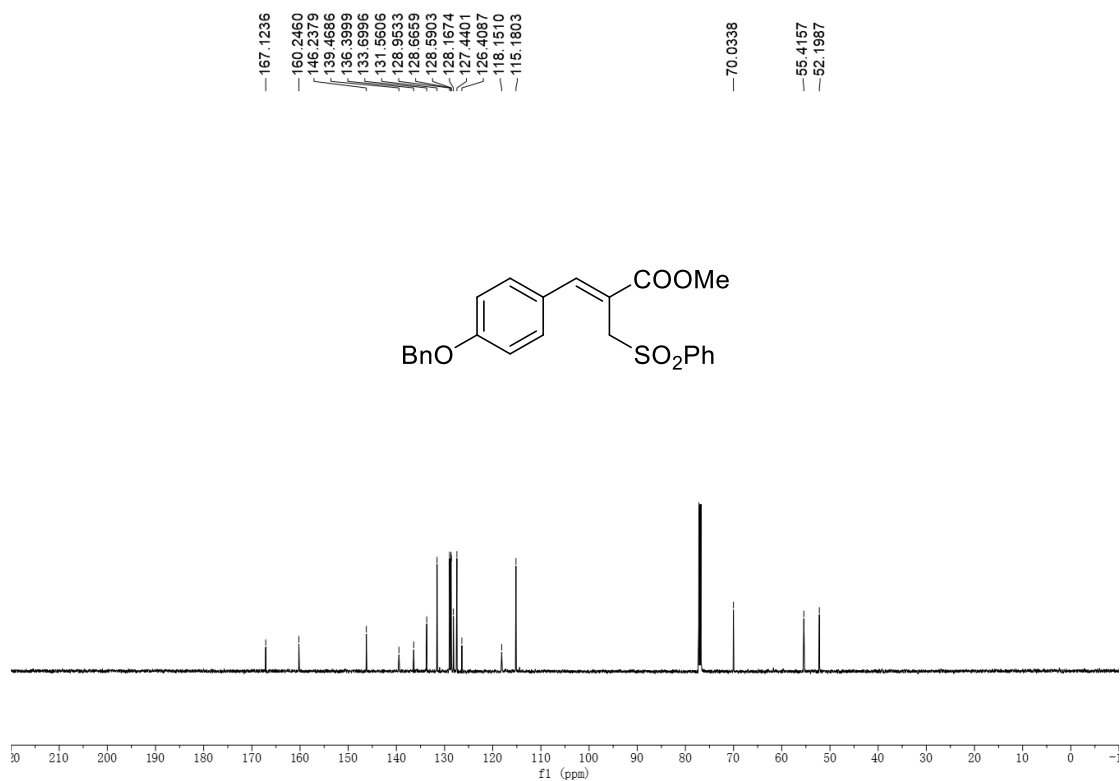

<sup>13</sup>C NMR (151 MHz, Chloroform-*d*)

(Z)-4-(3-methoxy-3-oxo-2-((phenylsulfonyl)methyl)prop-1-en-1-yl)phenyl benzoate

(1e)

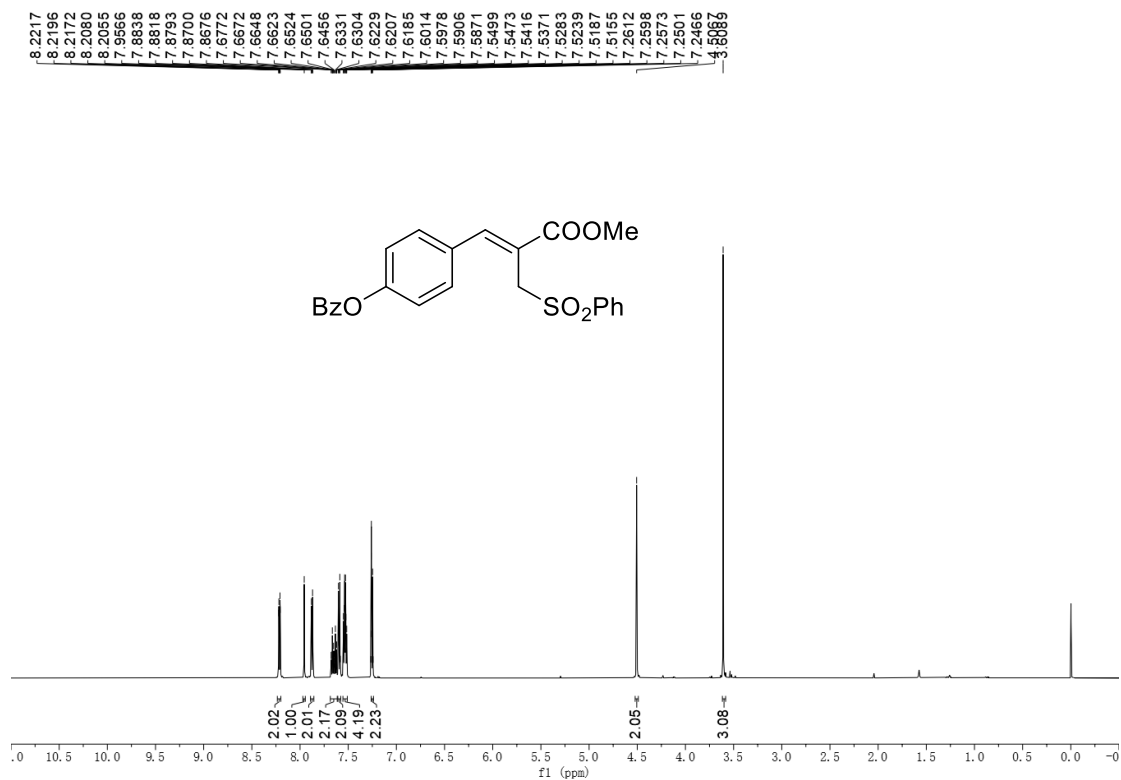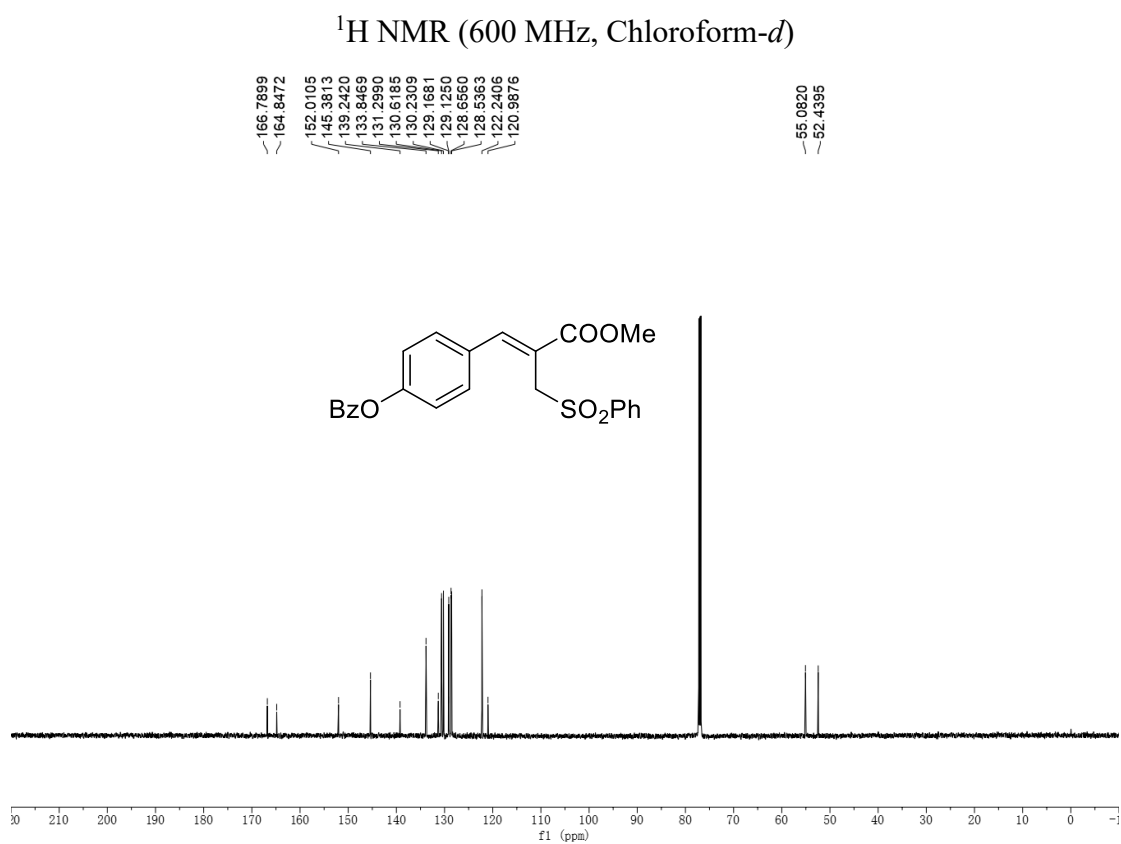

(Z)-4-(3-methoxy-3-oxo-2-((phenylsulfonyl)methyl)prop-1-en-1-yl)phenyl

4-

methoxybenzoate (**1f**)

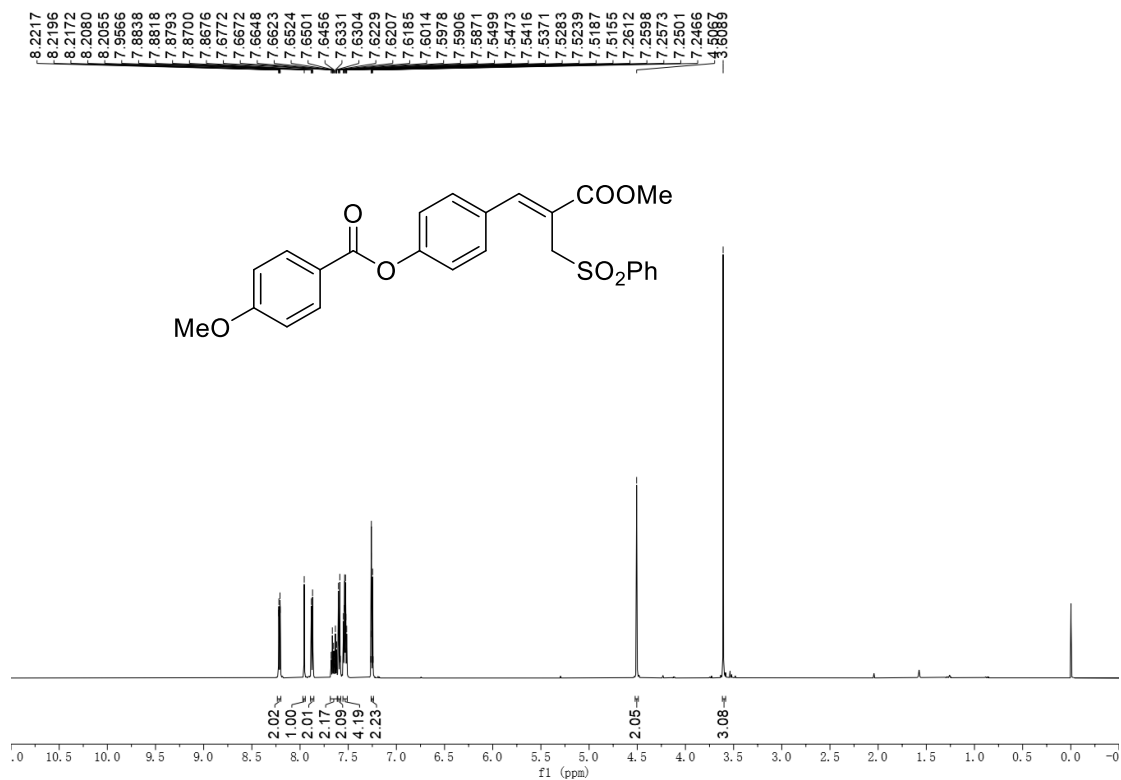

<sup>1</sup>H NMR (600 MHz, Chloroform-*d*)

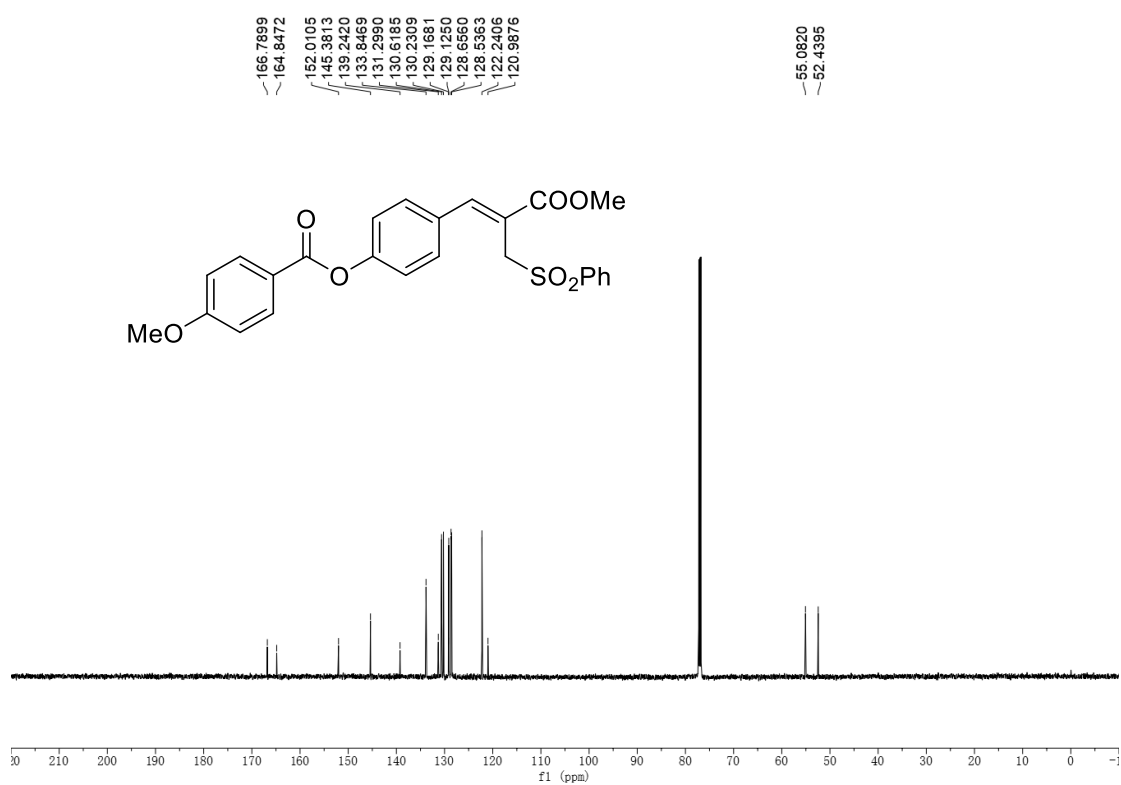

<sup>13</sup>C NMR (151 MHz, Chloroform-*d*)

Methyl

(*Z*)-3-(4-(((benzyloxy)carbonyl)oxy)phenyl)-2-

((phenylsulfonyl)methyl)acrylate

(1g)

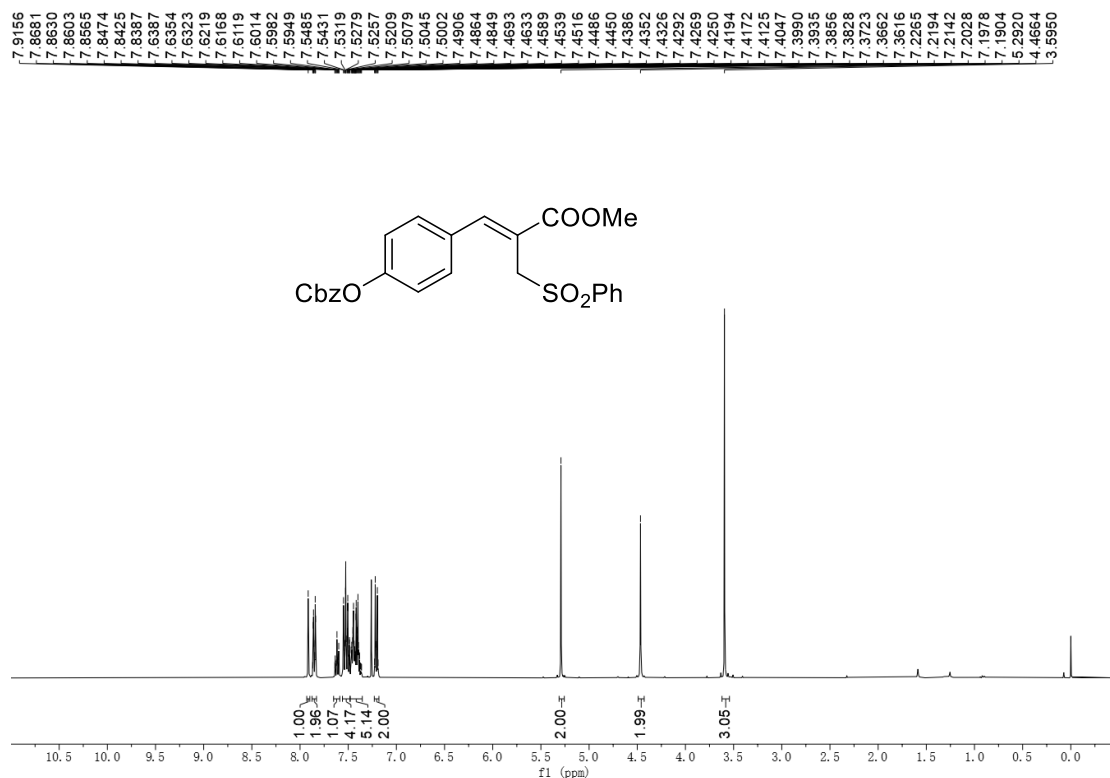

<sup>1</sup>H NMR (400 MHz, Chloroform-*d*)

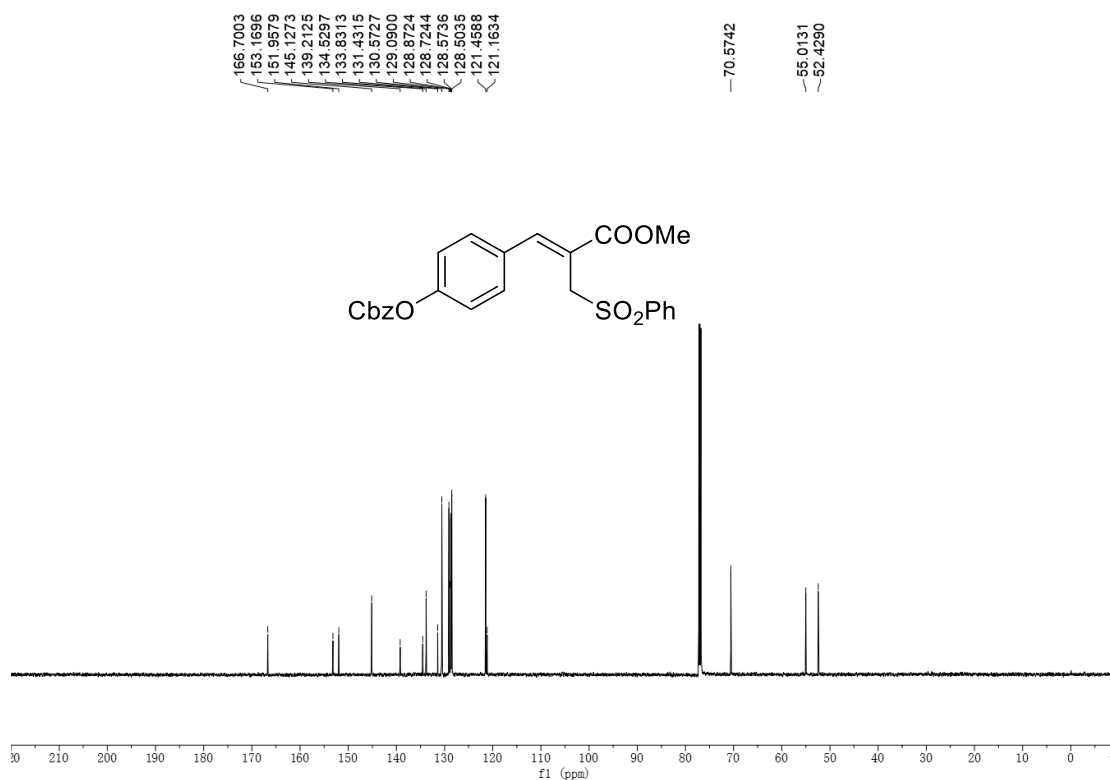

<sup>13</sup>C NMR (151 MHz, Chloroform-*d*)

Methyl (Z)-3-(4-hydroxyphenyl)-2-((phenylsulfonyl)methyl)acrylate (**1h**)

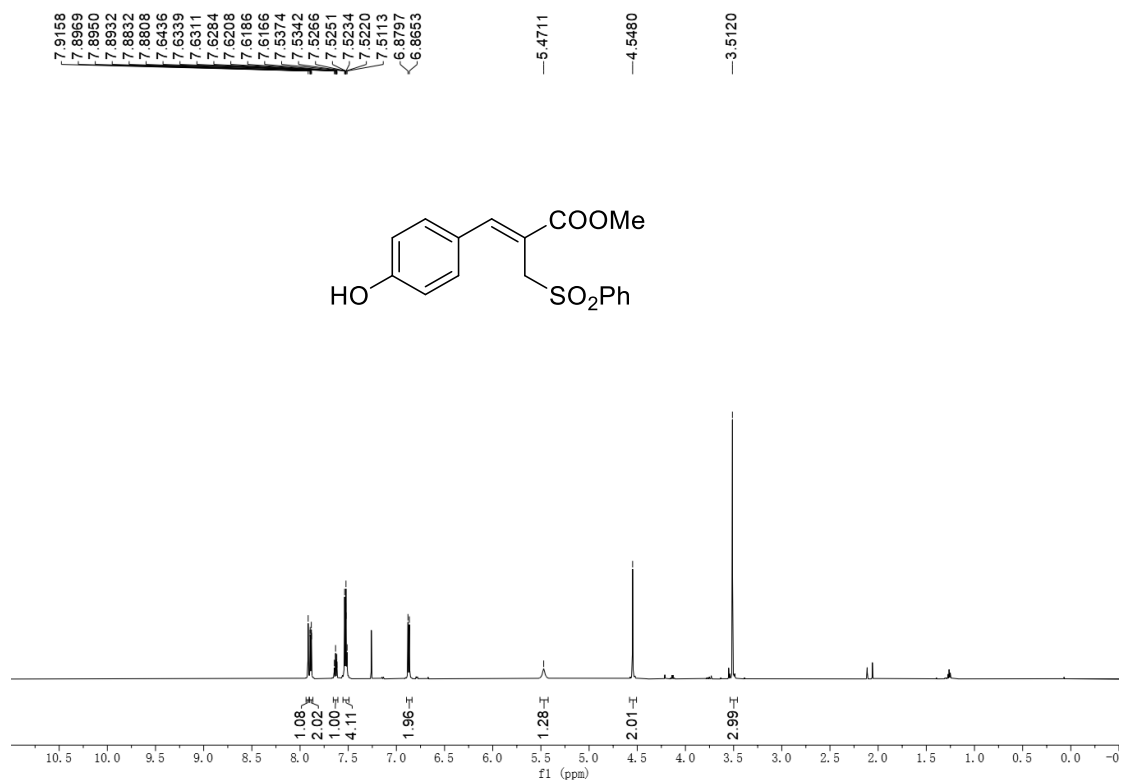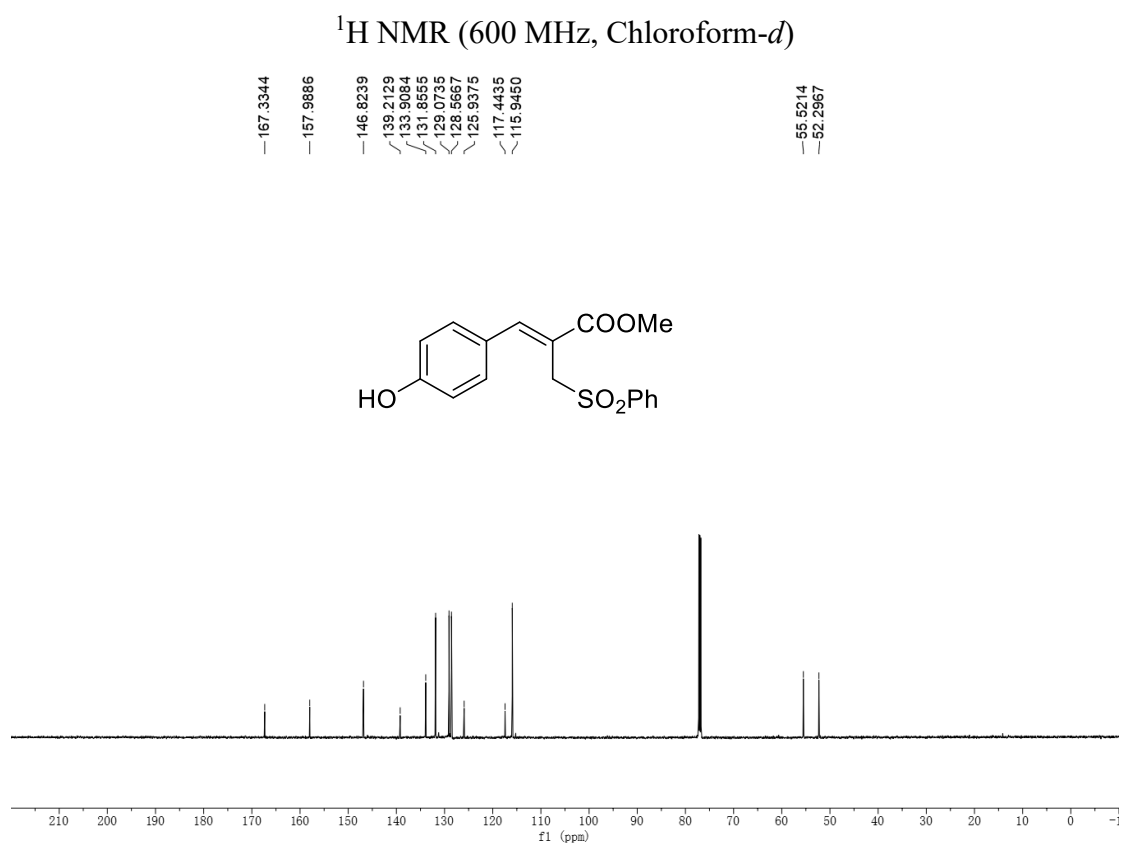

Methyl (Z)-3-(4-bromophenyl)-2-((phenylsulfonyl)methyl)acrylate (**1i**)

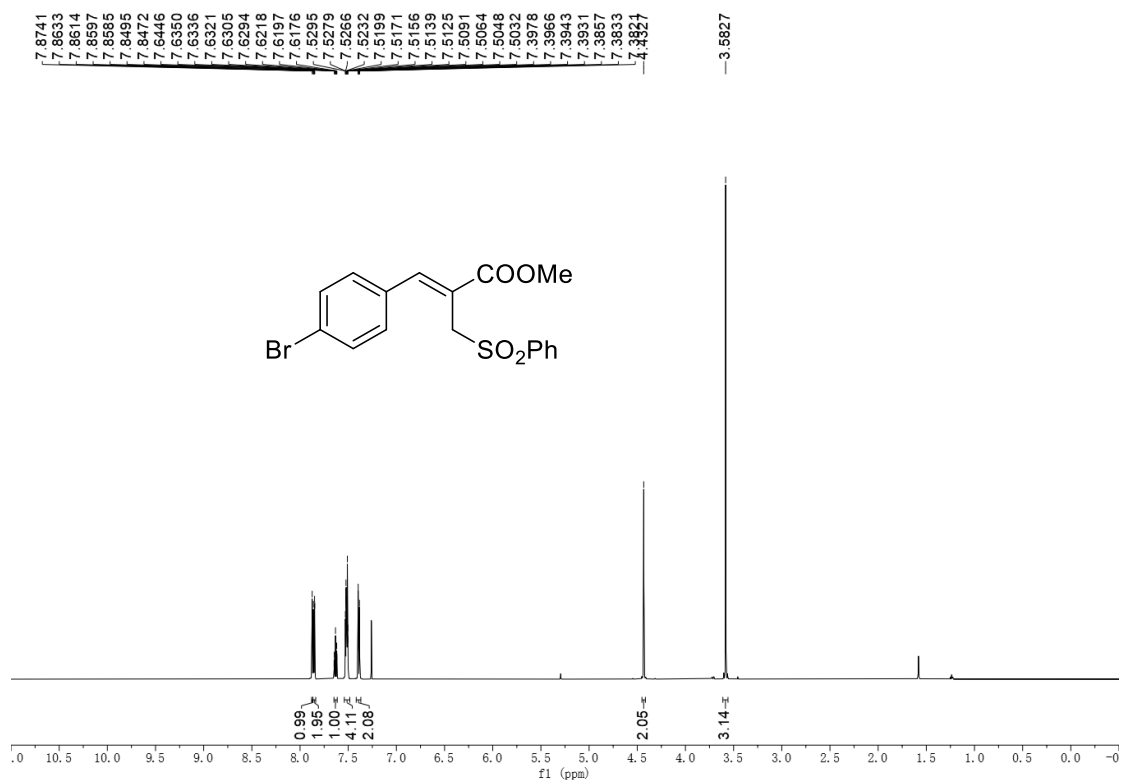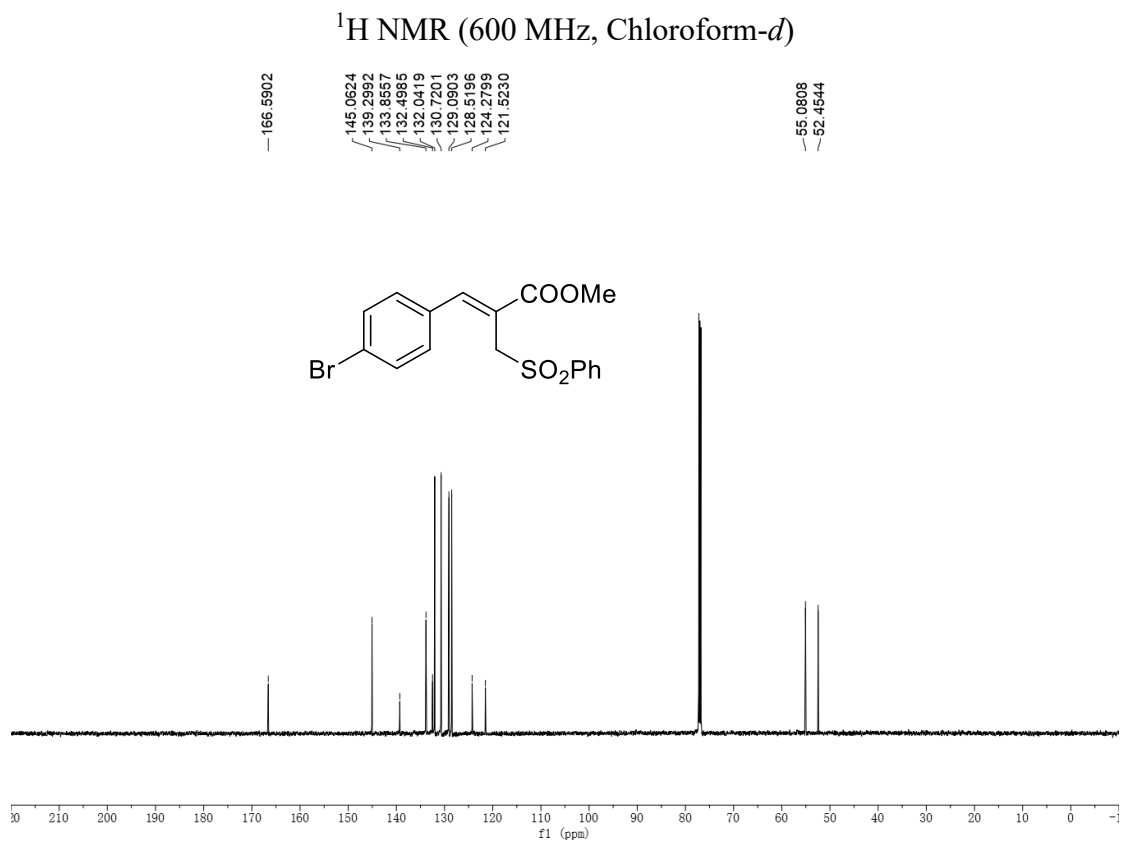

Methyl (Z)-3-(4-nitrophenyl)-2-((phenylsulfonyl)methyl)acrylate (**1j**)

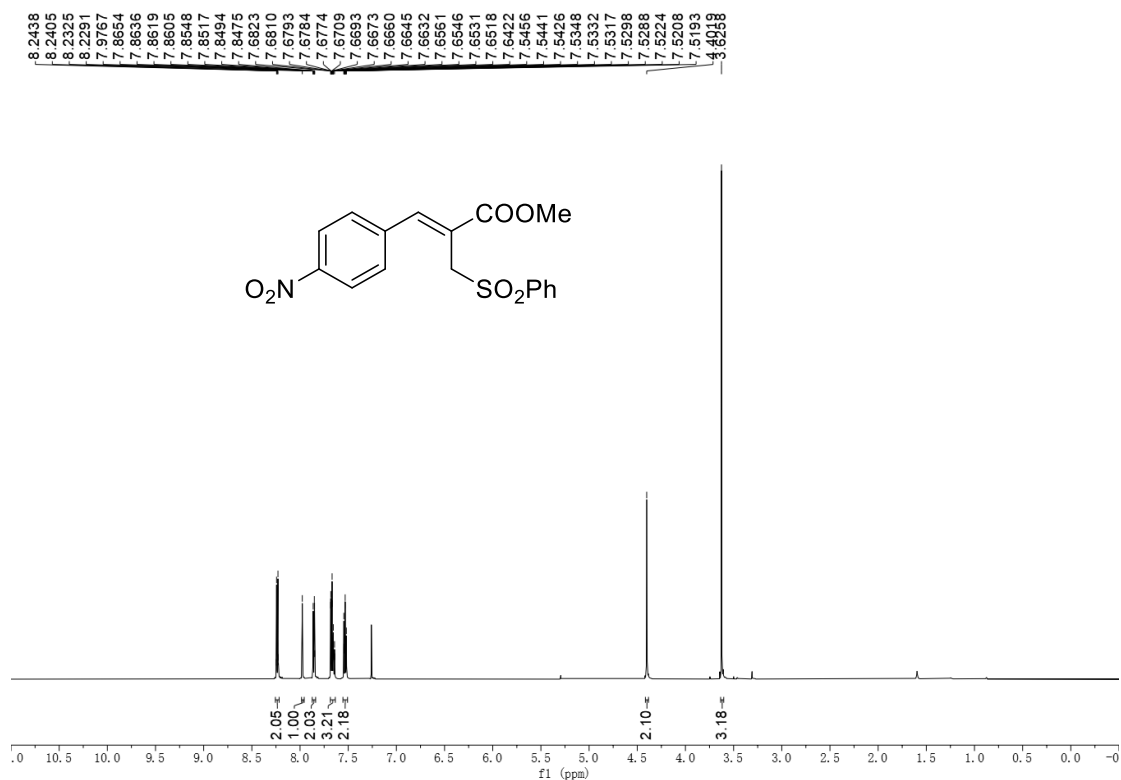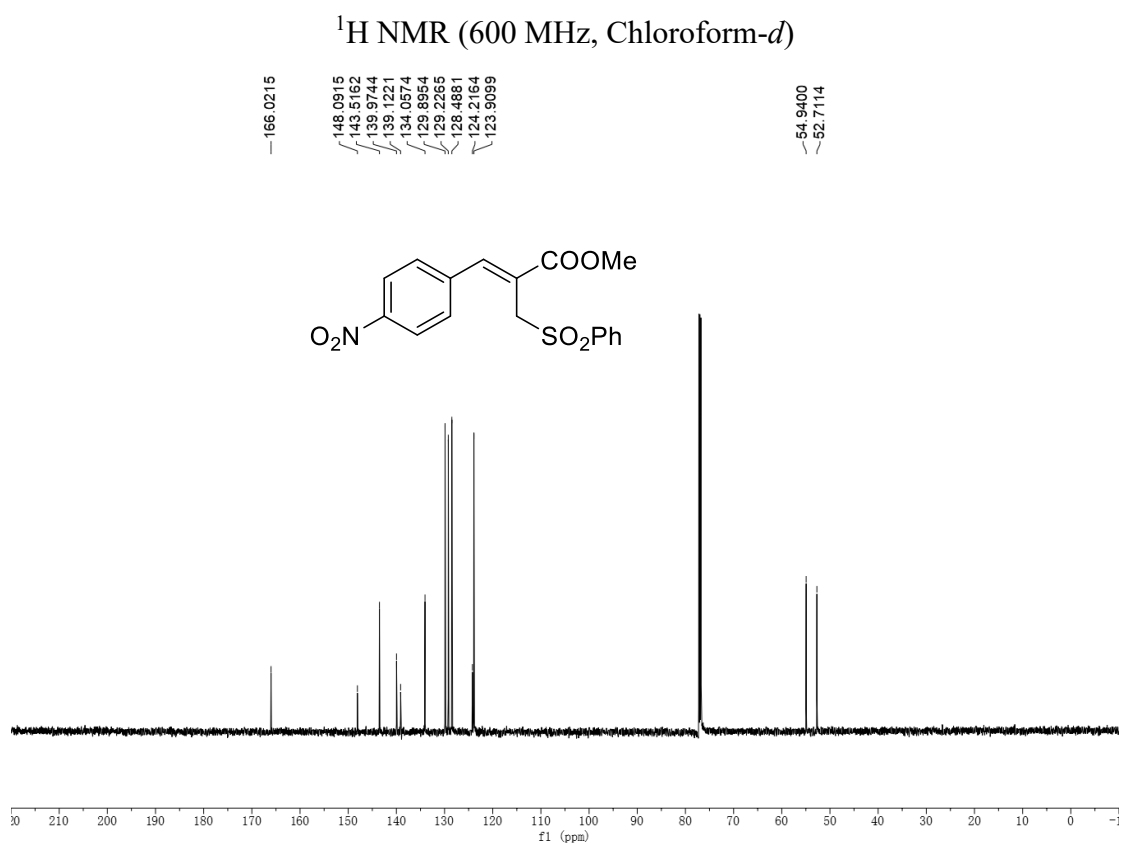

Methyl (Z)-2-((phenylsulfonyl)methyl)-3-(*m*-tolyl)acrylate (**1k**)

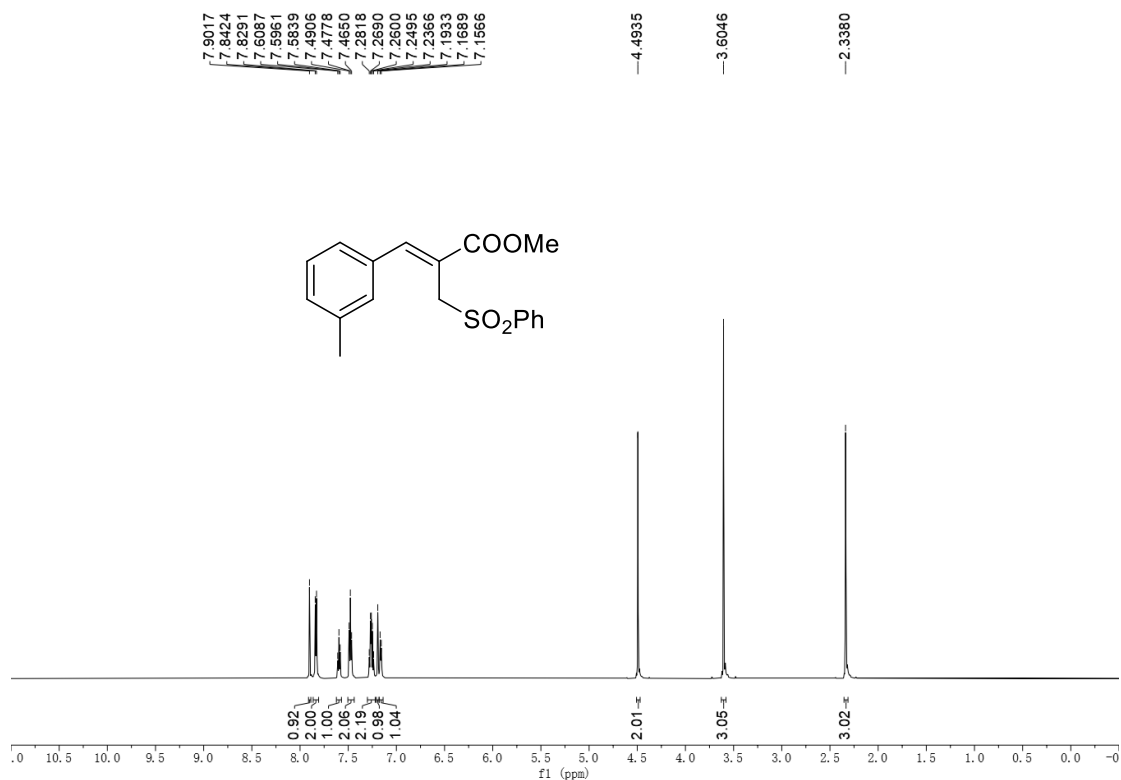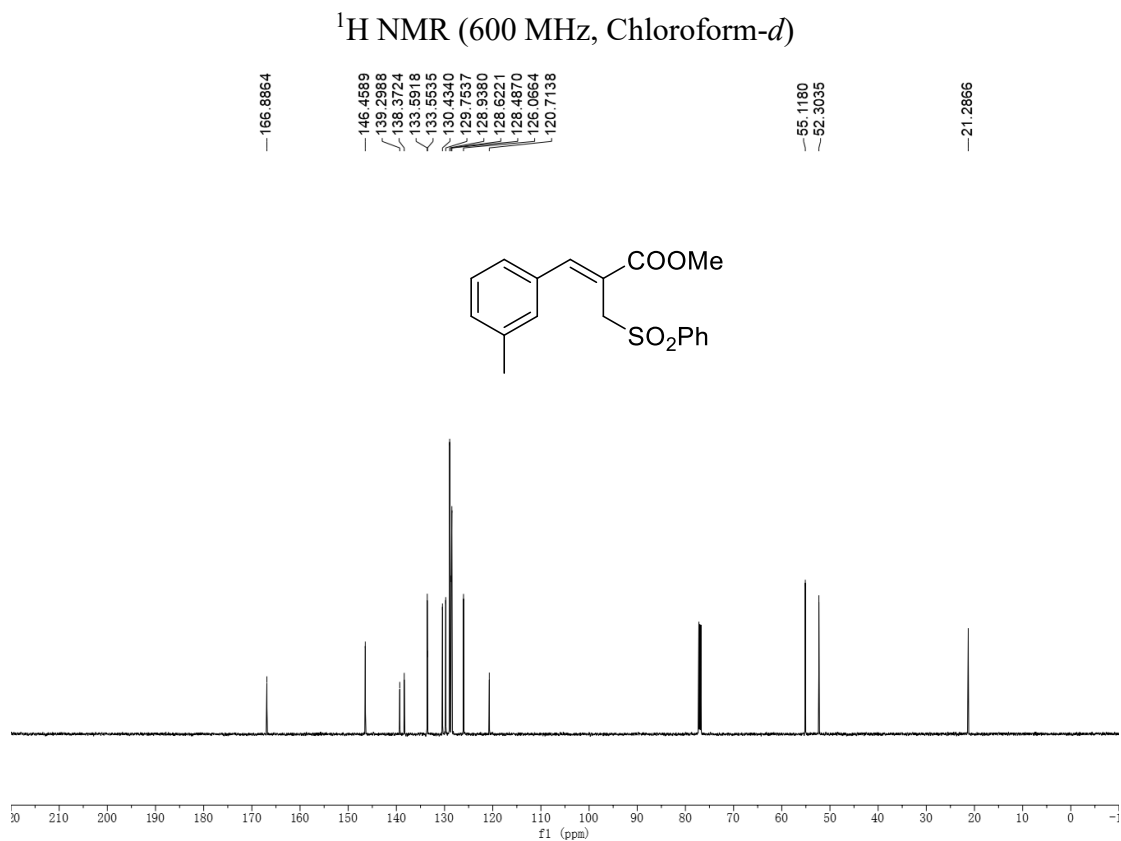



Methyl (Z)-3-(3-methoxyphenyl)-2-((phenylsulfonyl)methyl)acrylate (**1l**)

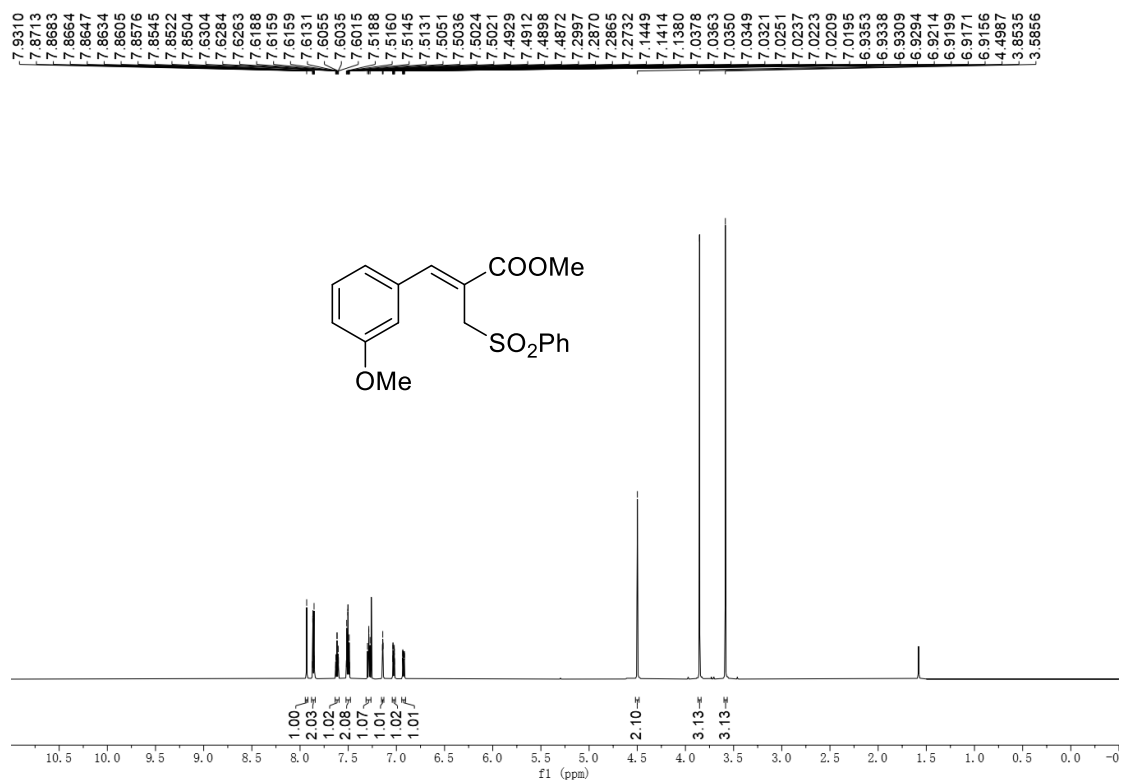

<sup>1</sup>H NMR (600 MHz, Chloroform-*d*)

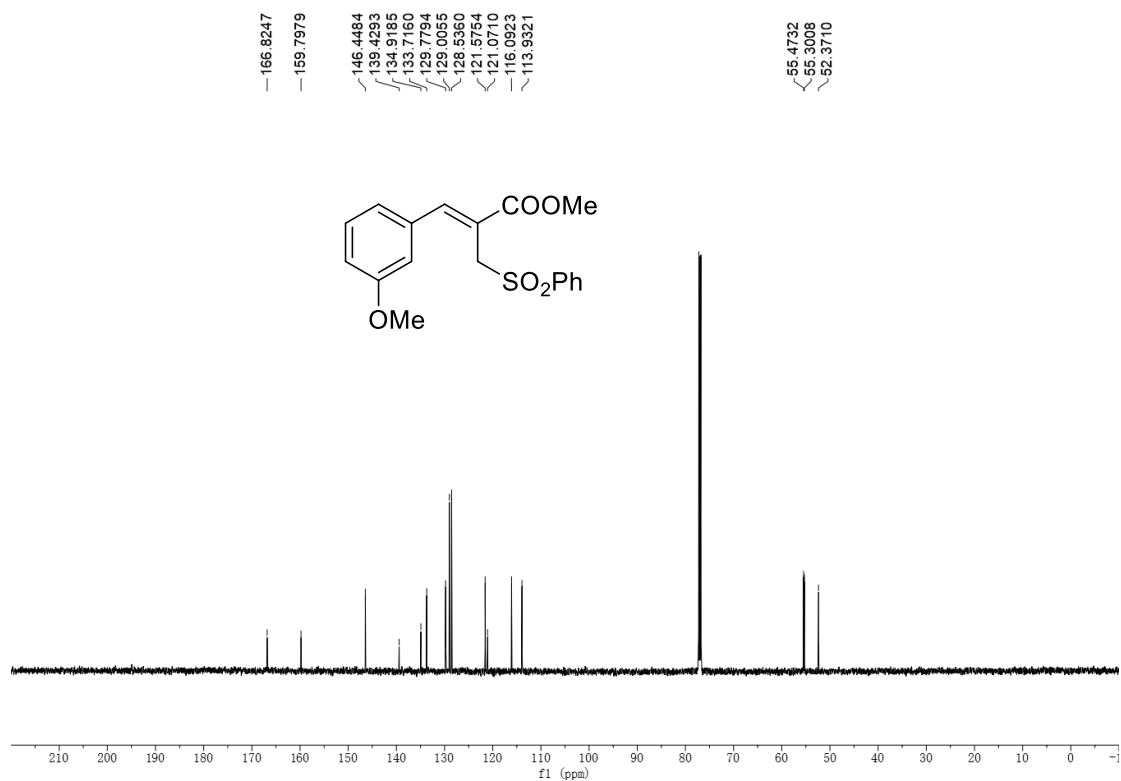

<sup>13</sup>C NMR (151 MHz, Chloroform-*d*)

Methyl (Z)-3-(3-fluorophenyl)-2-((phenylsulfonyl)methyl)acrylate (**1m**)

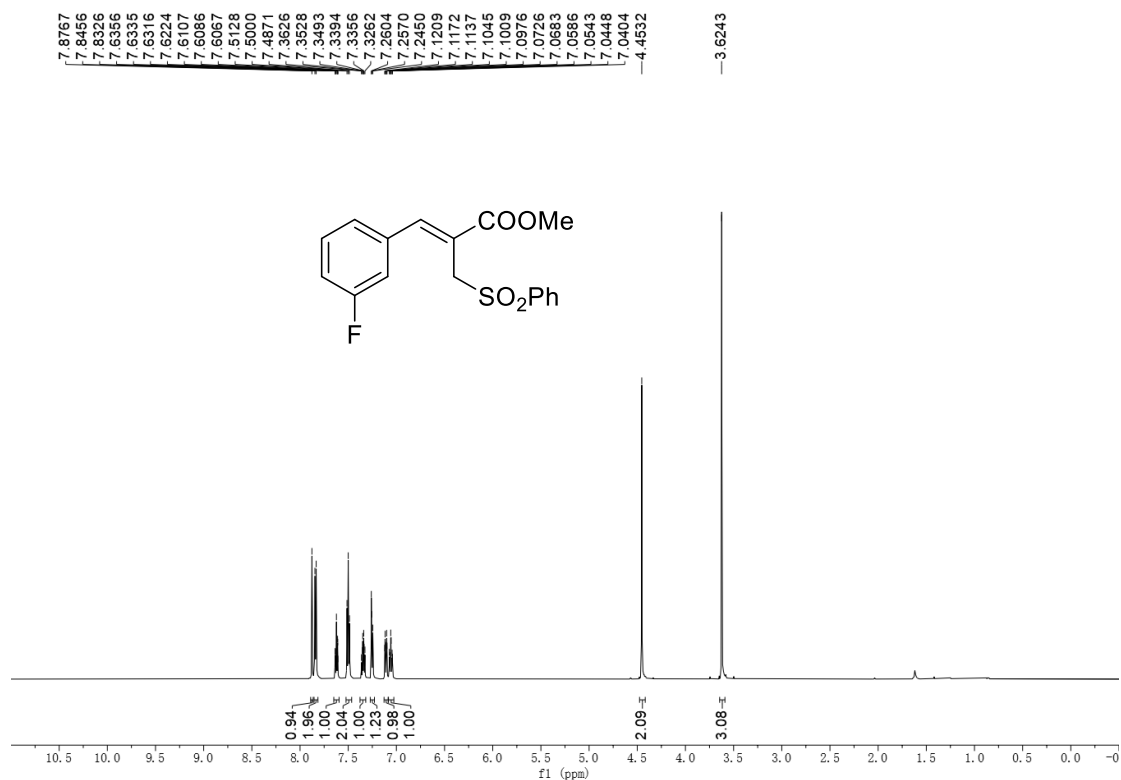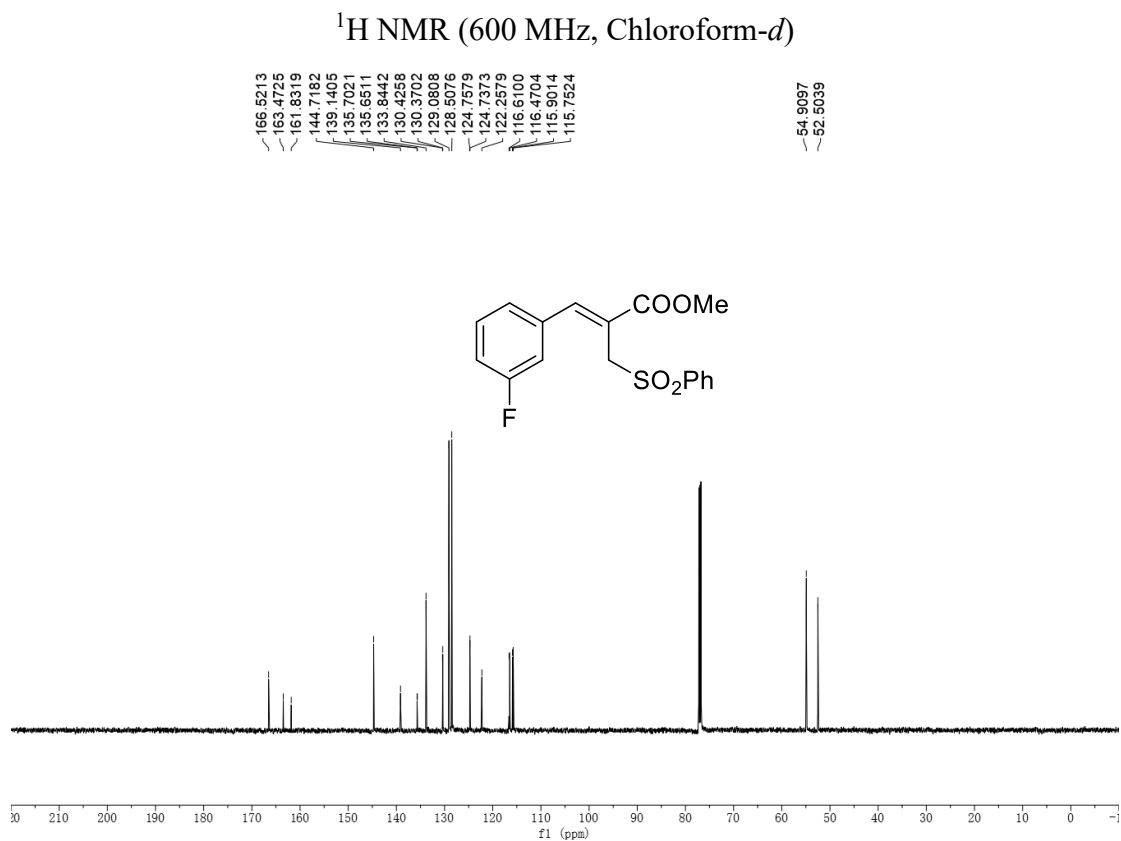

Methyl (Z)-3-(3-bromophenyl)-2-((phenylsulfonyl)methyl)acrylate (**1n**)

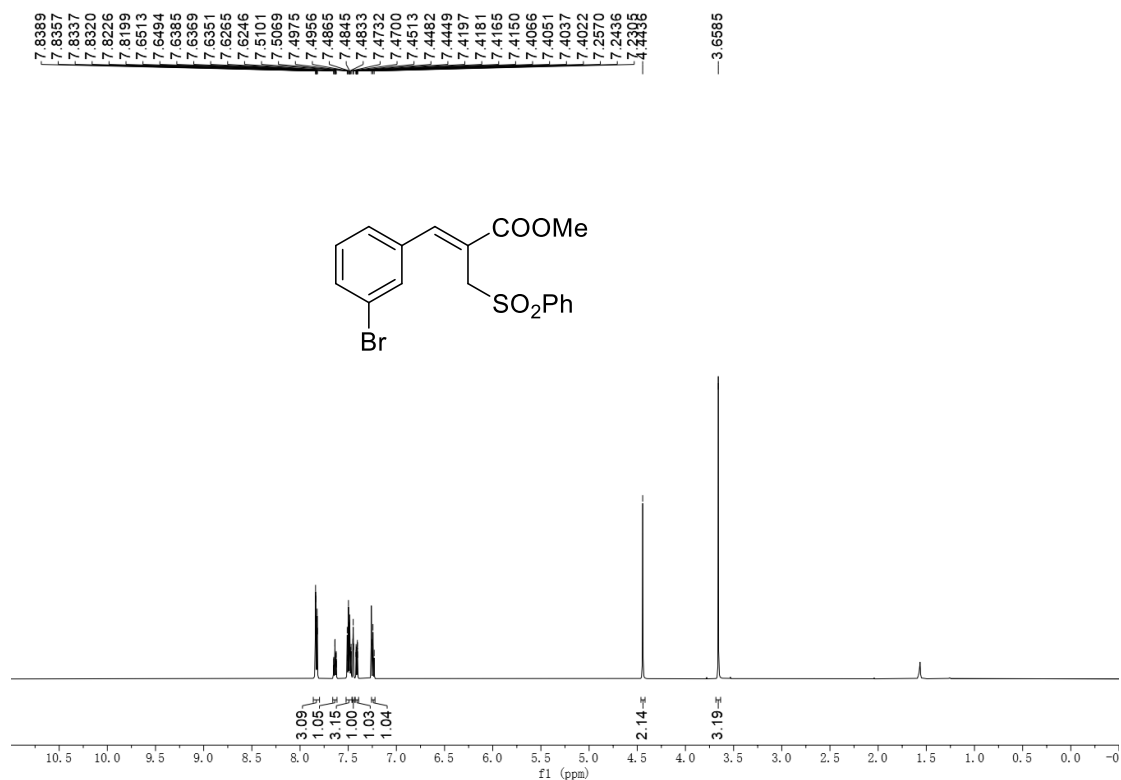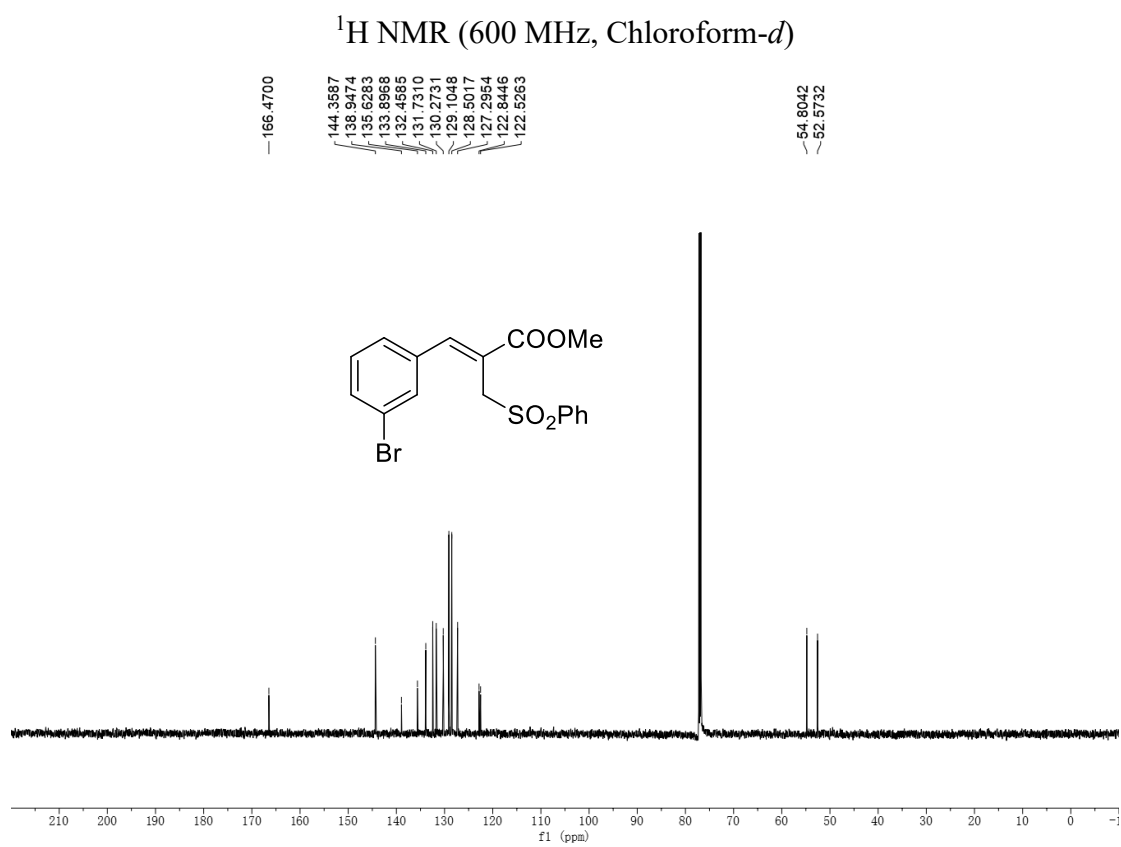

Methyl (Z)-3-(2-fluorophenyl)-2-((phenylsulfonyl)methyl)acrylate (**1o**)

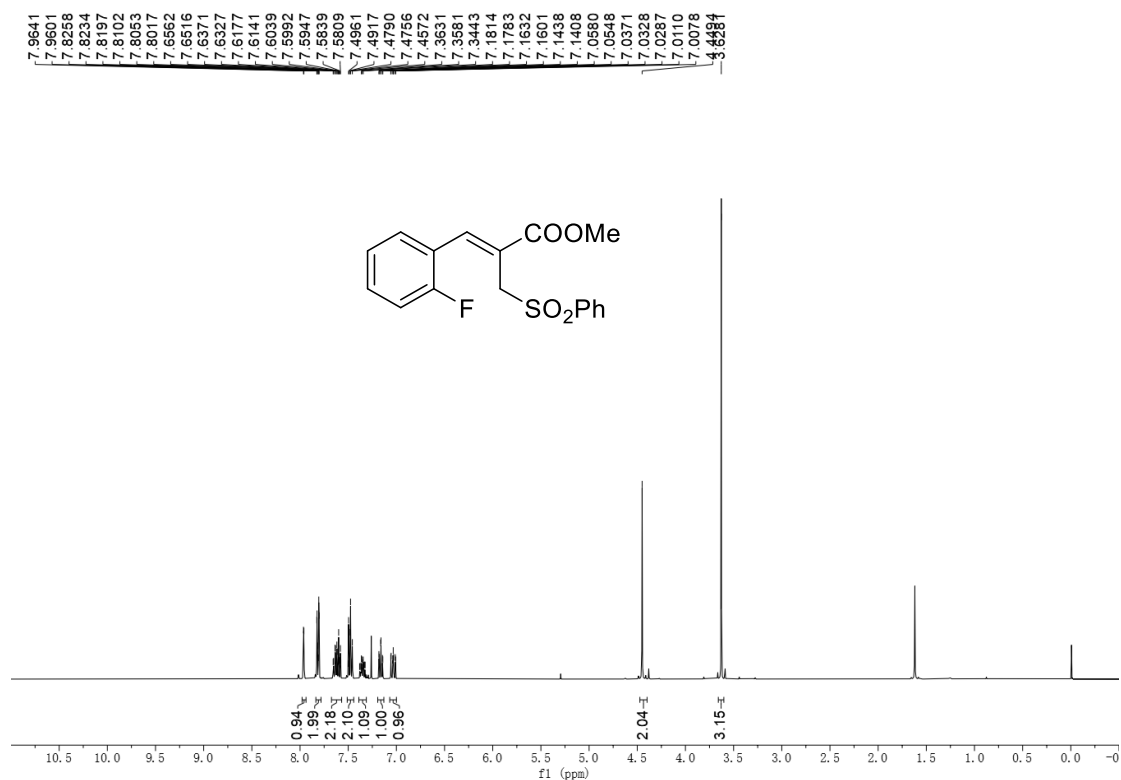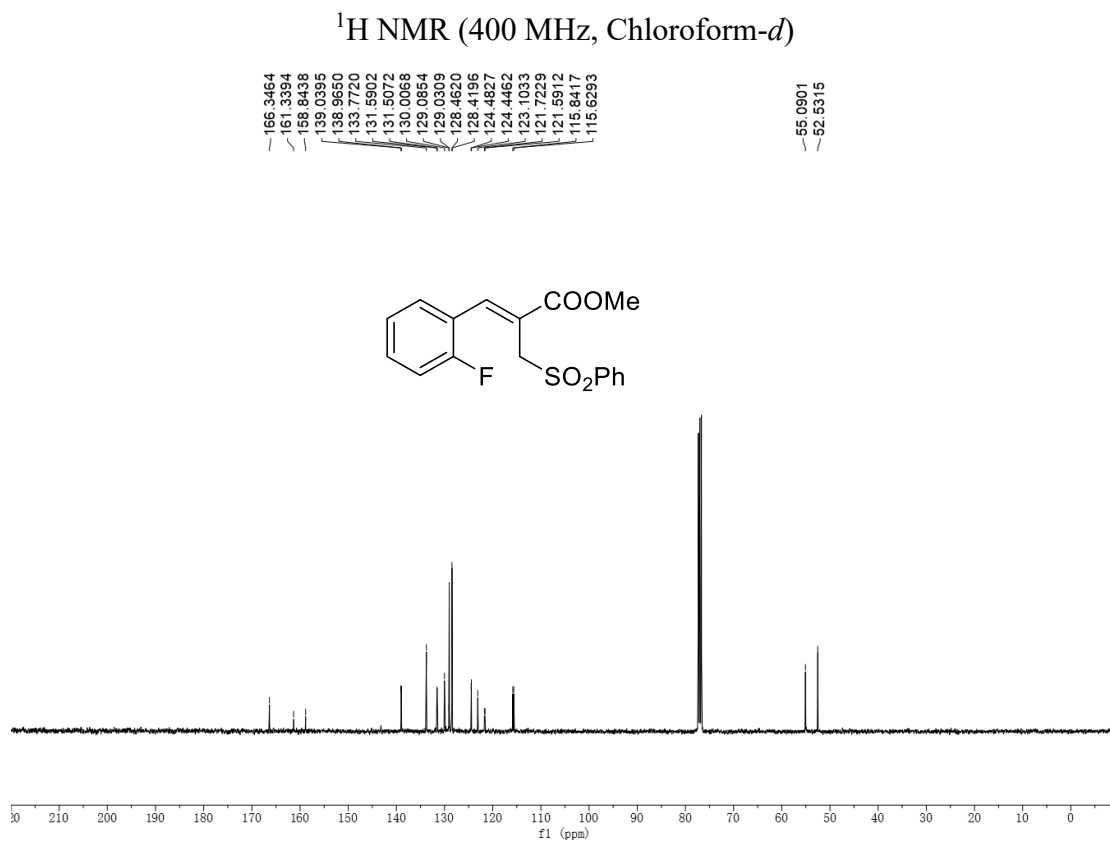

Methyl (Z)-3-(2-bromophenyl)-2-((phenylsulfonyl)methyl)acrylate (**1p**)

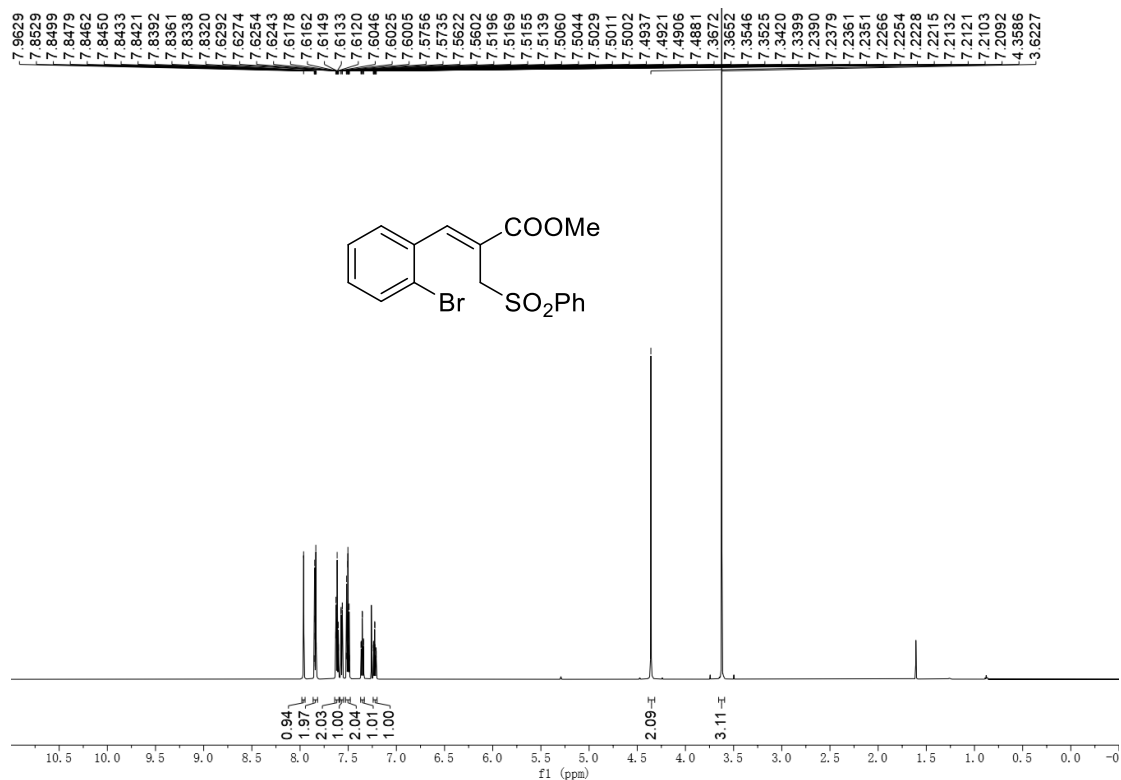

<sup>1</sup>H NMR (600 MHz, Chloroform-*d*)

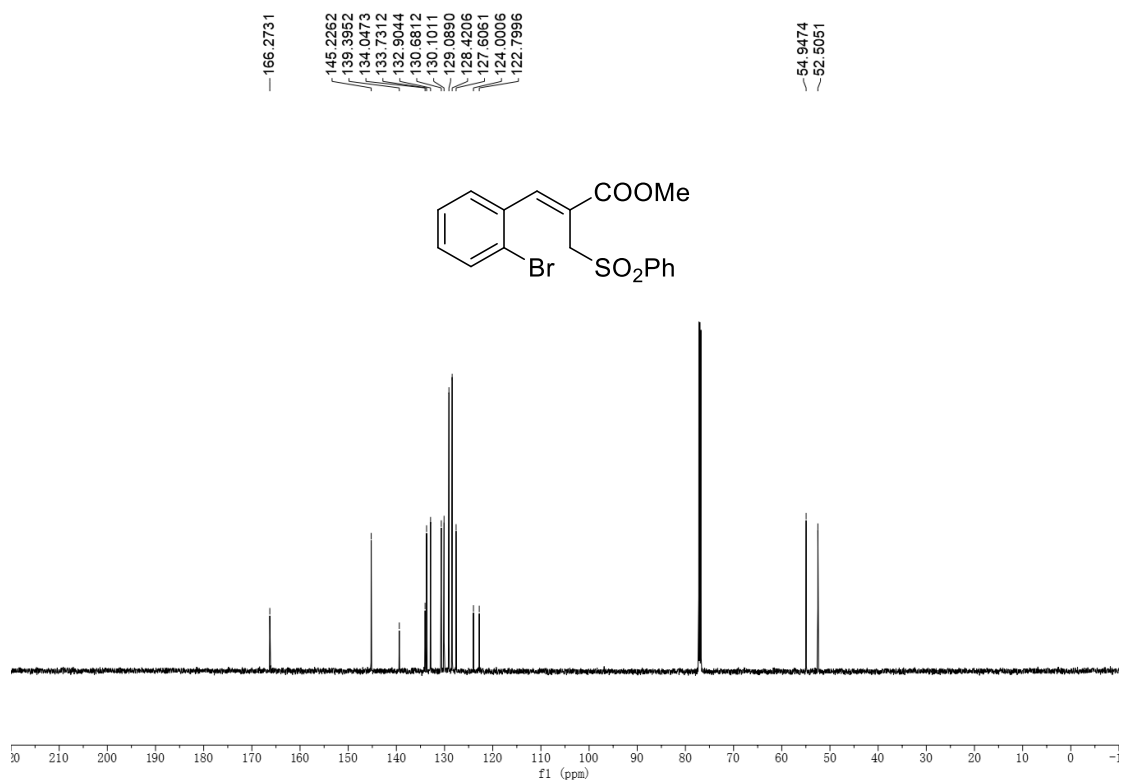

<sup>13</sup>C NMR (151 MHz, Chloroform-*d*)

Methyl (Z)-3-(3,4-dichlorophenyl)-2-((phenylsulfonyl)methyl)acrylate (**1q**)

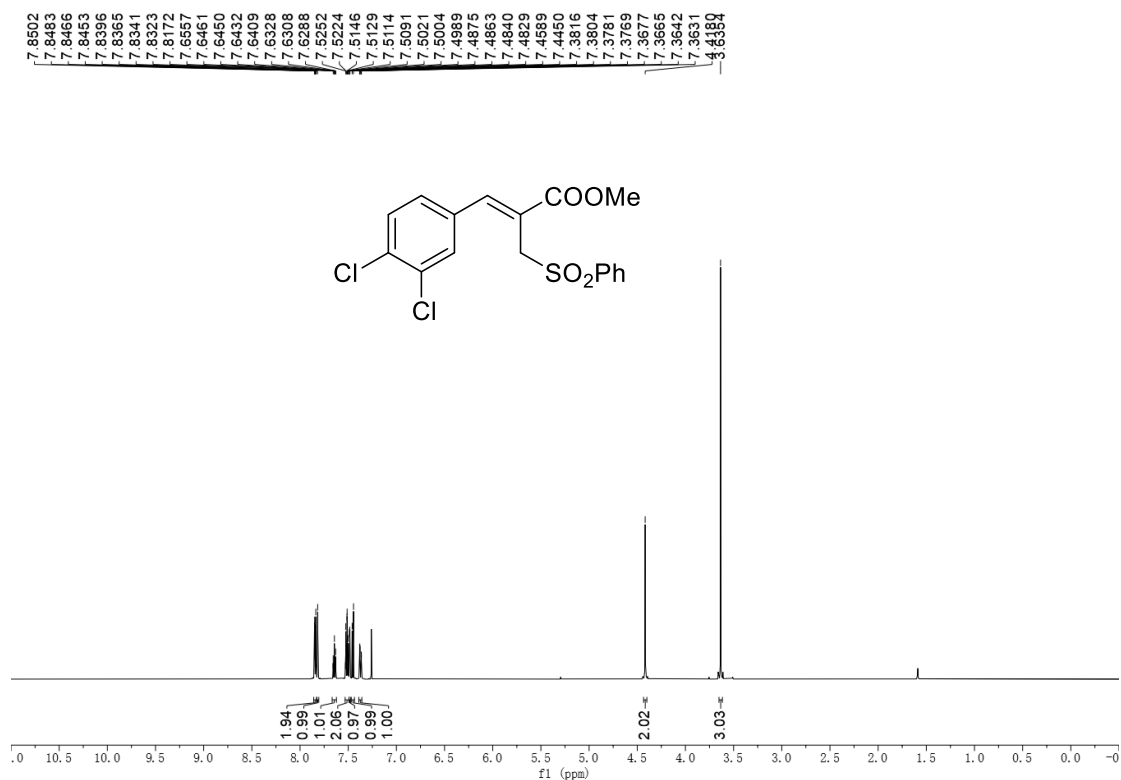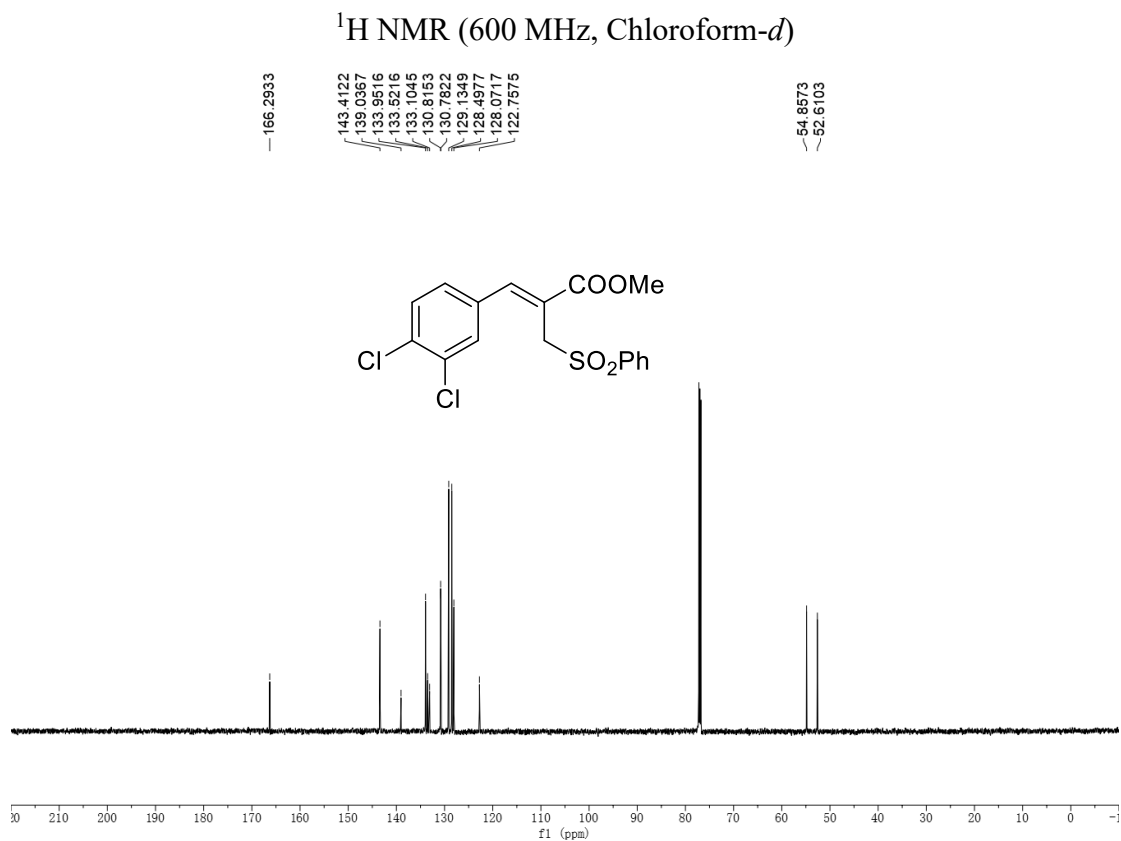

Methyl (Z)-3-(naphthalen-2-yl)-2-((phenylsulfonyl)methyl)acrylate (**1r**)

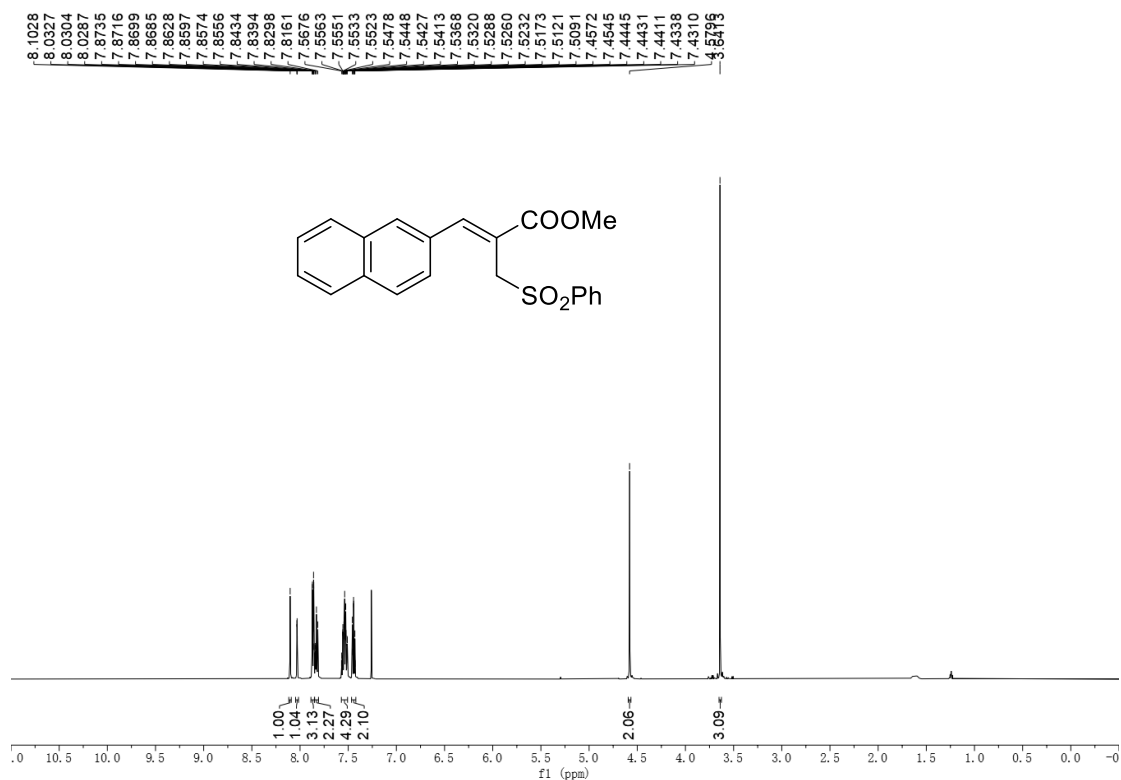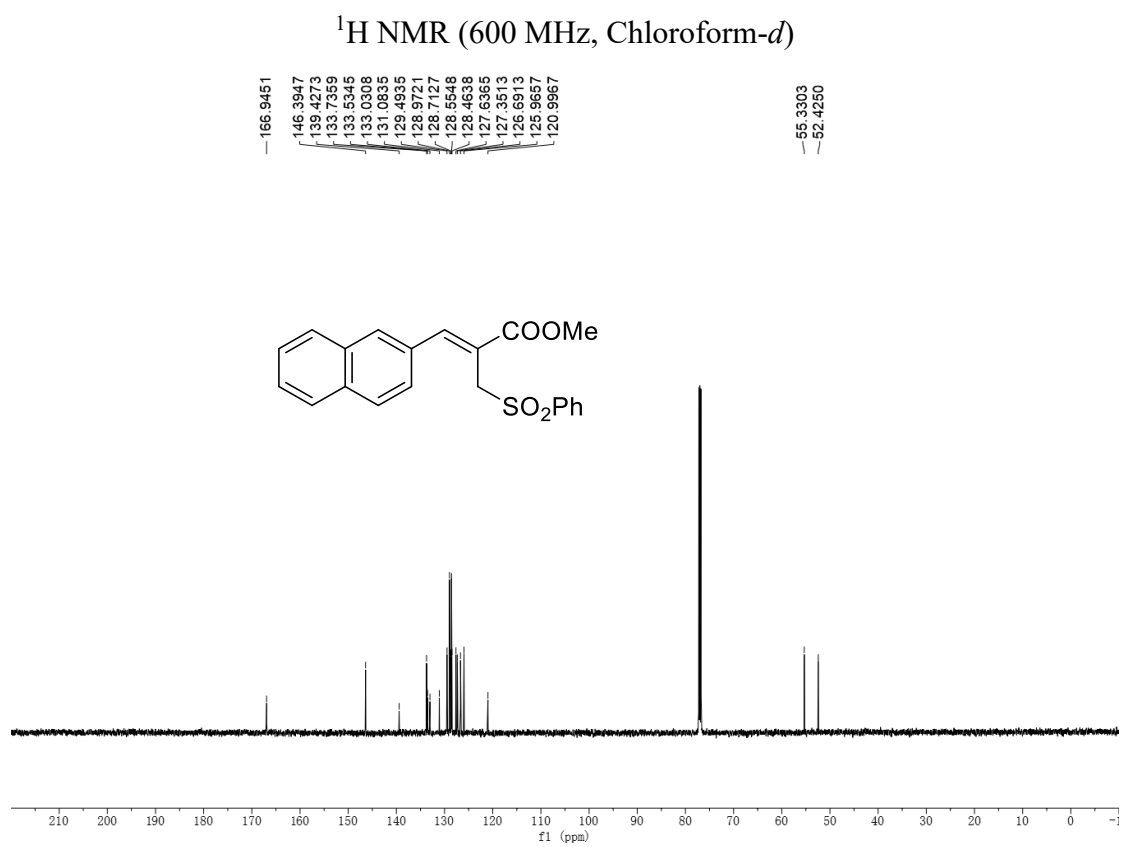

Methyl (Z)-2-((phenylsulfonyl)methyl)-3-(thiophen-2-yl)acrylate (**1s**)

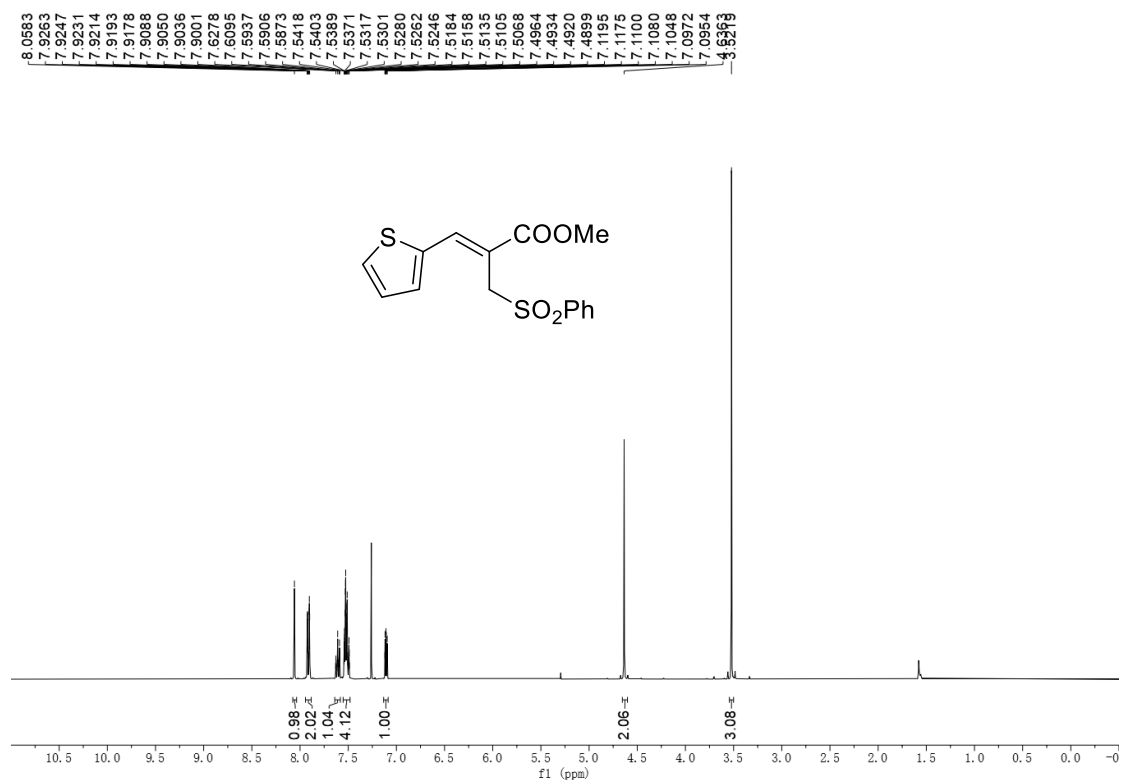

<sup>1</sup>H NMR (400 MHz, Chloroform-*d*)

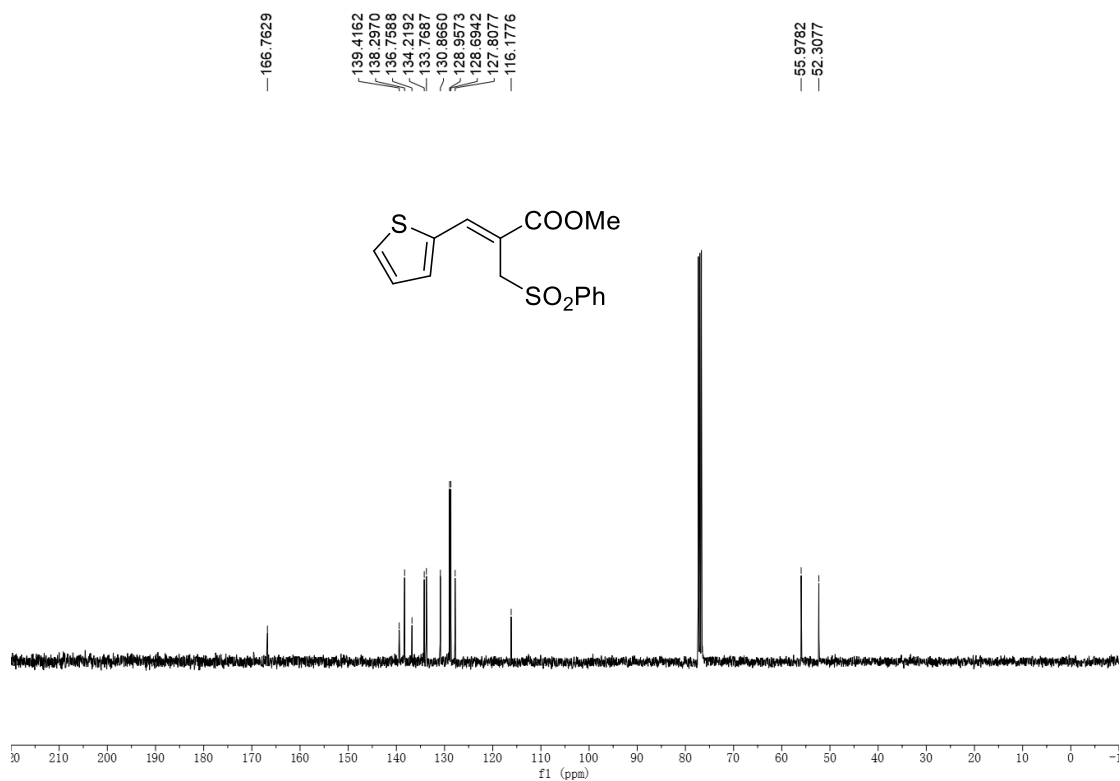

<sup>13</sup>C NMR (101 MHz, Chloroform-*d*)



Methyl (Z)-3-(furan-2-yl)-2-((phenylsulfonyl)methyl)acrylate (**1t**)

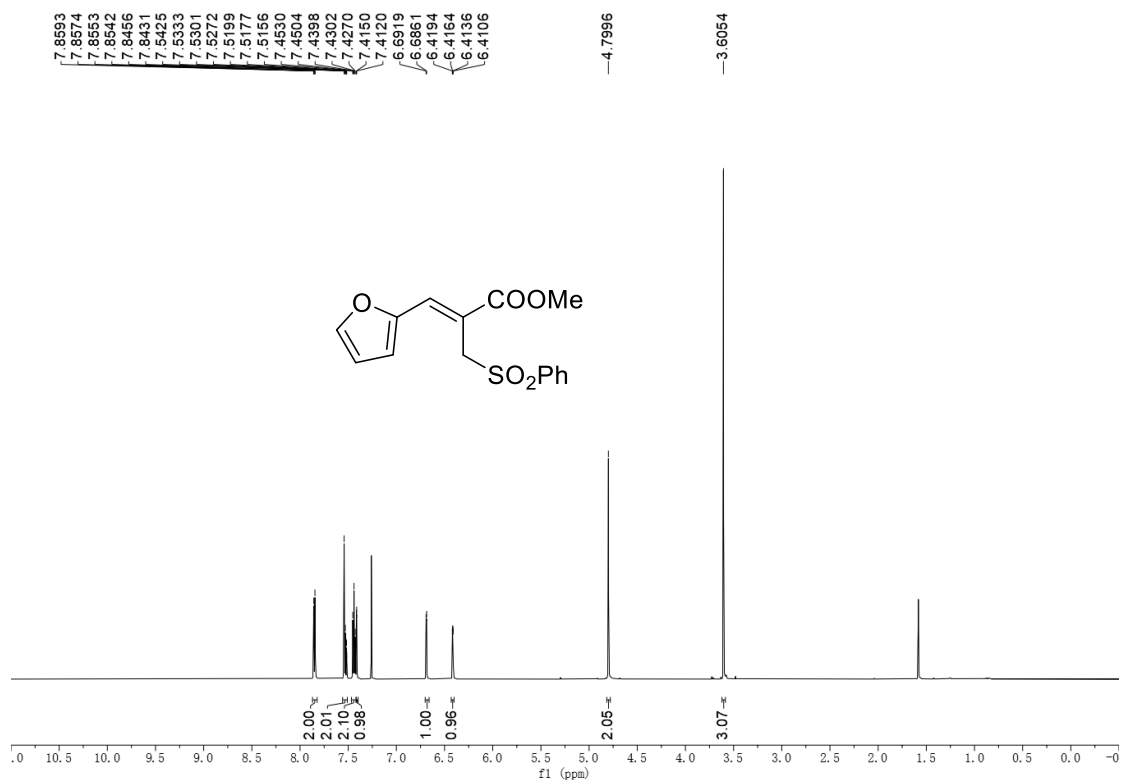

<sup>1</sup>H NMR (600 MHz, Chloroform-*d*)

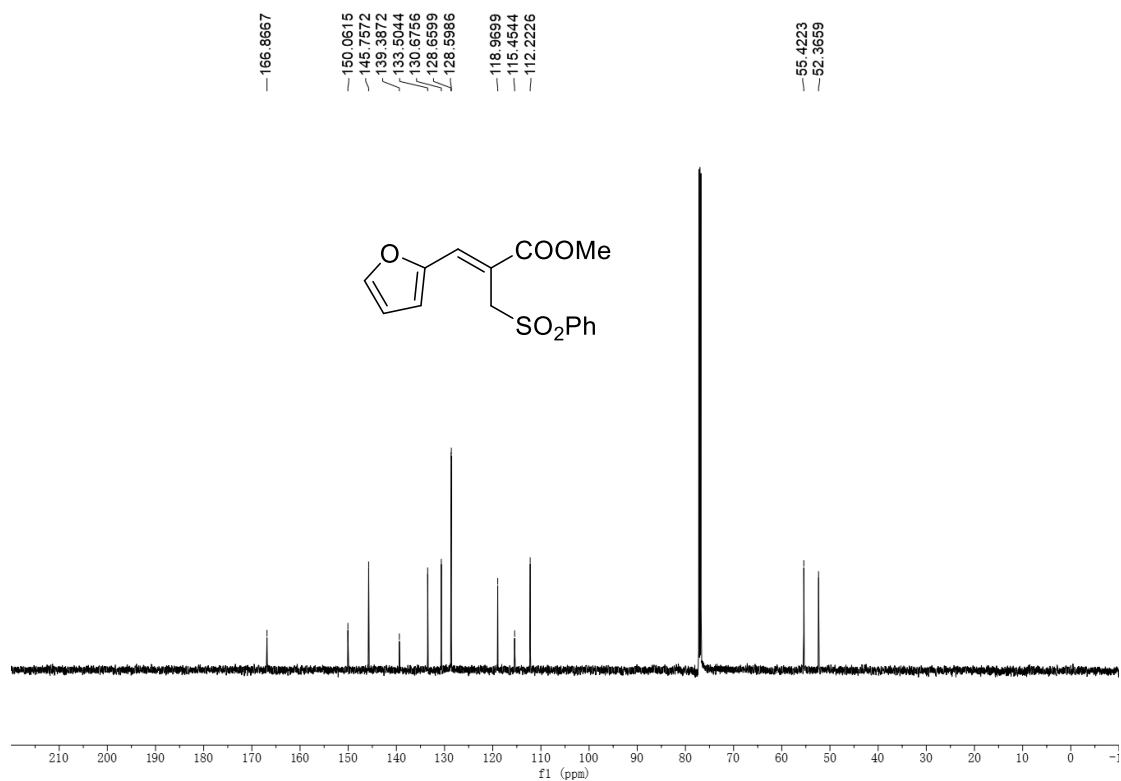

<sup>13</sup>C NMR (151 MHz, Chloroform-*d*)

Methyl (Z)-2-((phenylsulfonyl)methyl)-3-(pyridin-3-yl)acrylate (**1u**)

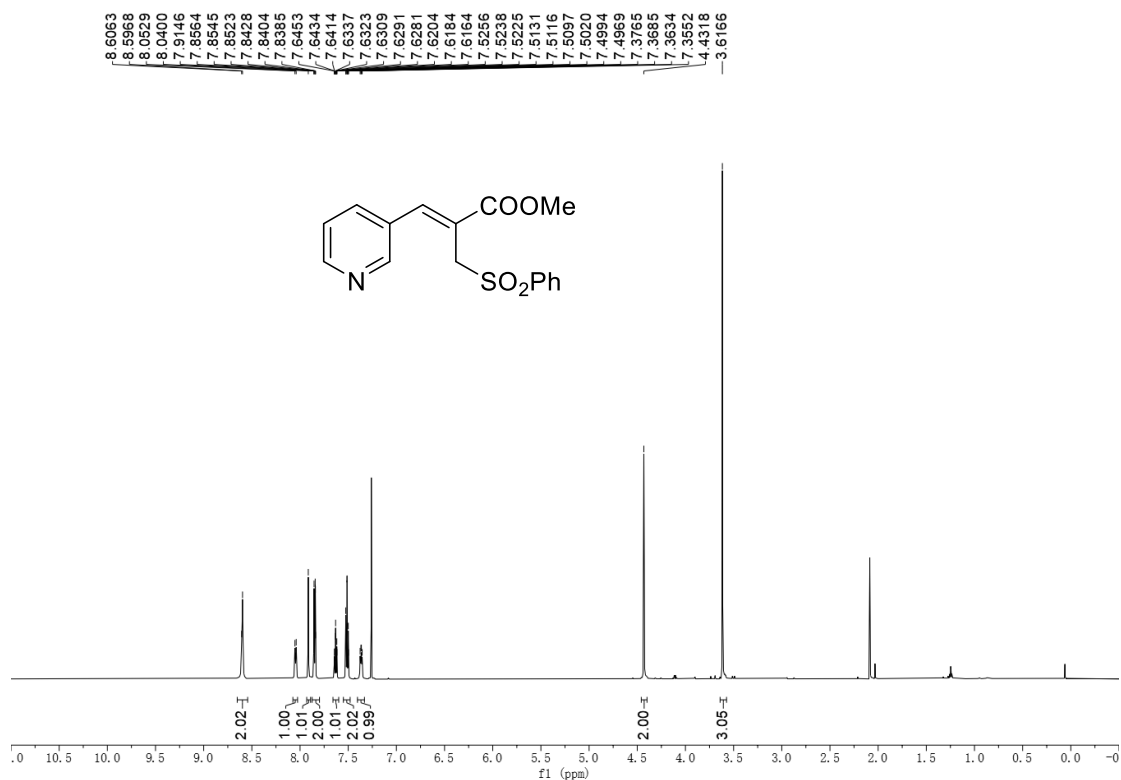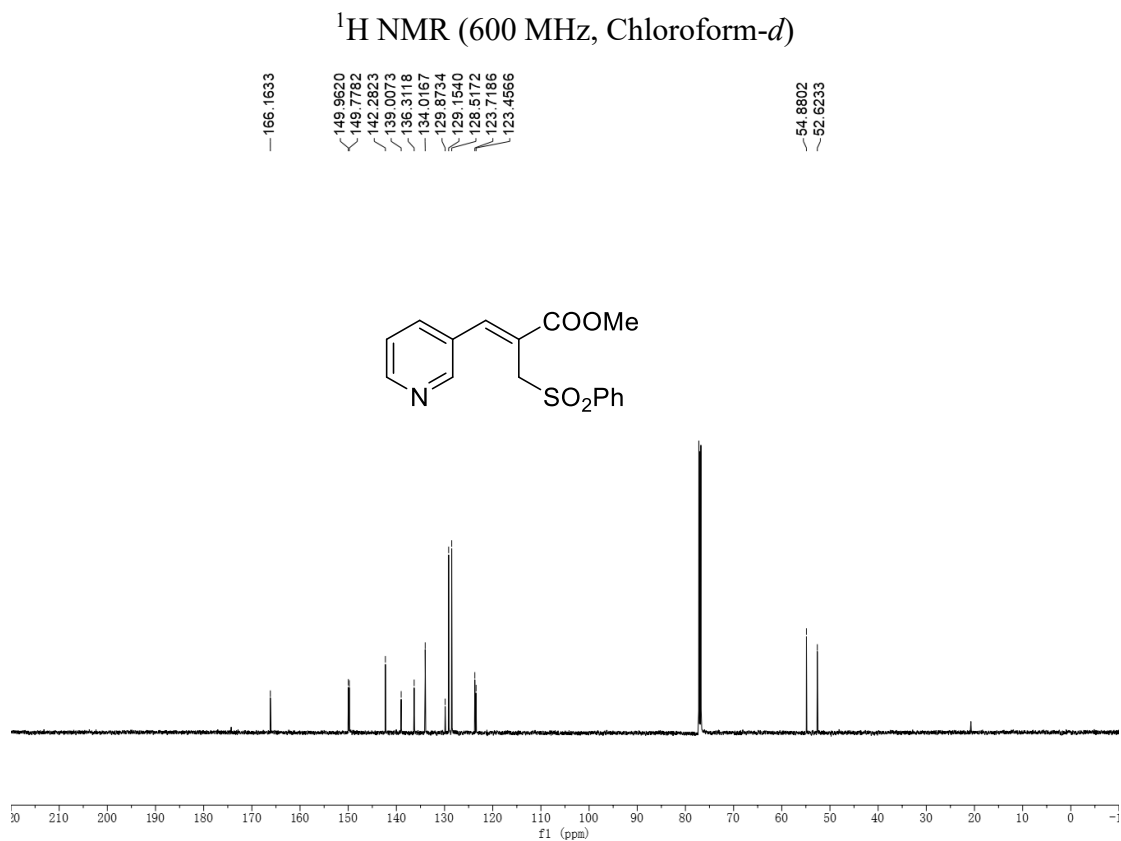

Methyl (Z)-4-methyl-2-((phenylsulfonyl)methyl)pent-2-enoate (**1v**)

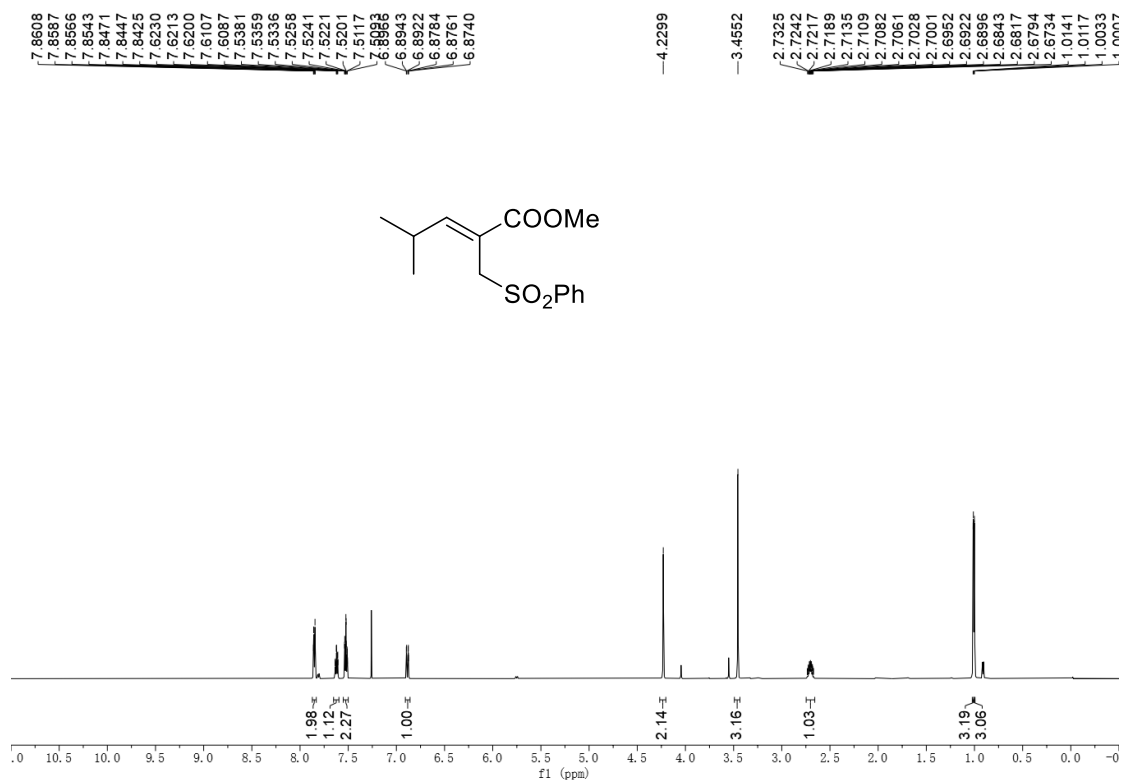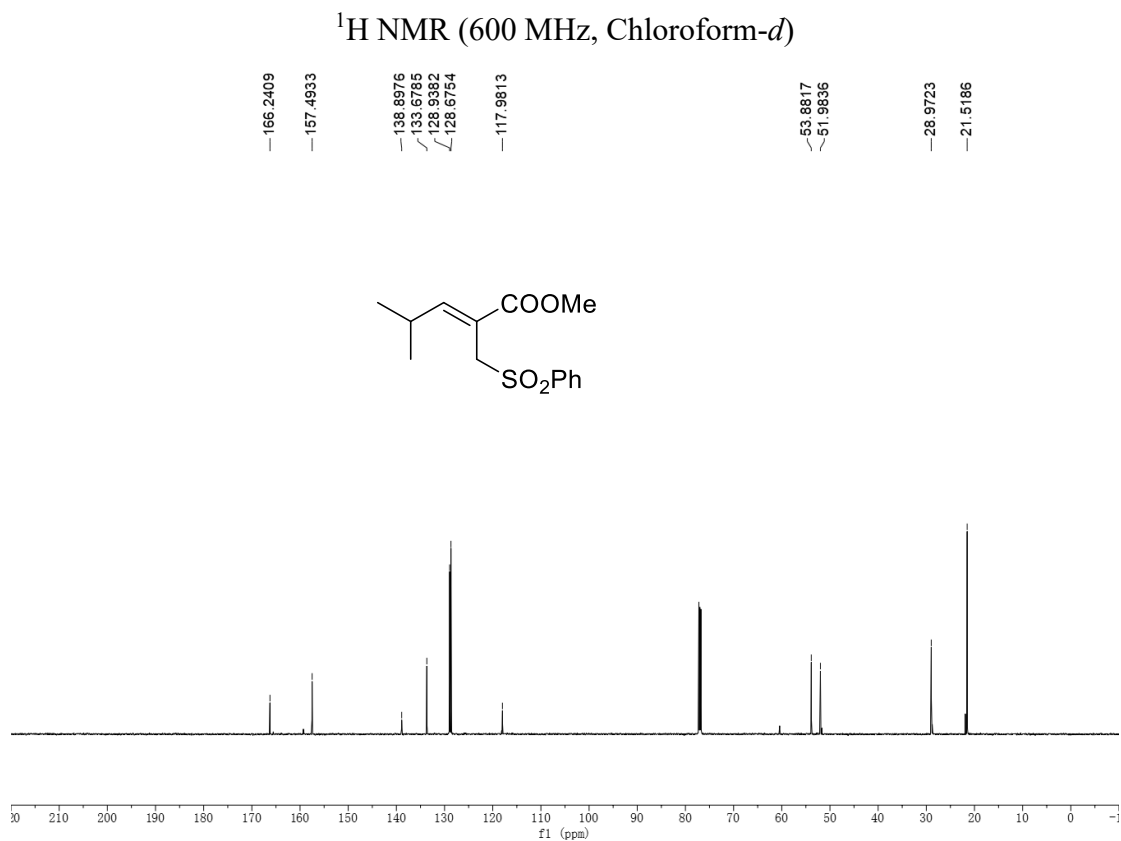

Methyl (Z)-3-phenyl-2-(tosylmethyl)acrylate (**3a**)

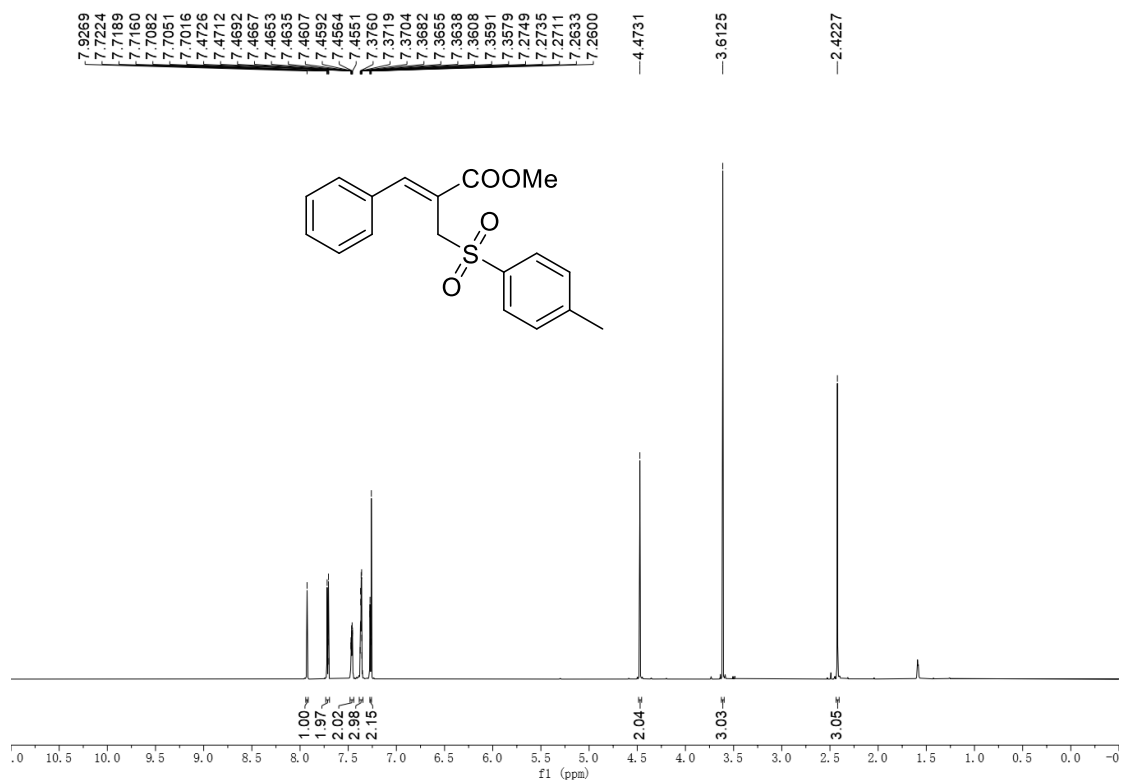

<sup>1</sup>H NMR (600 MHz, Chloroform-*d*)

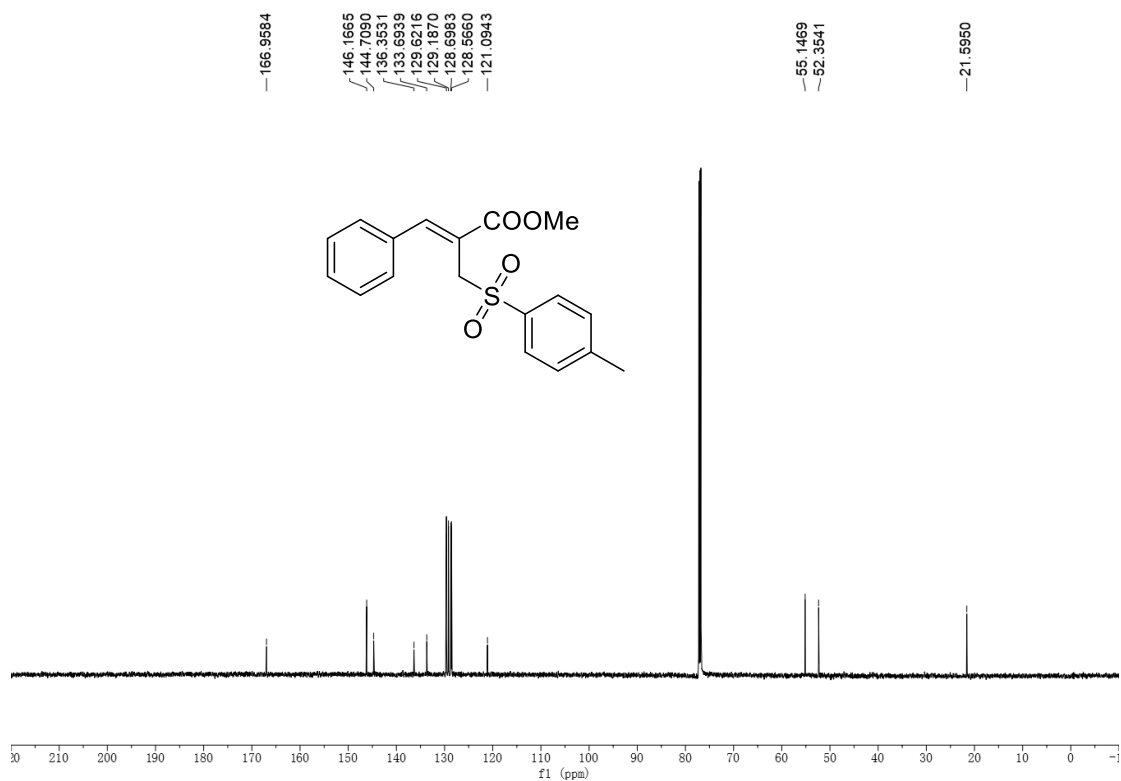

<sup>13</sup>C NMR (151 MHz, Chloroform-*d*)

Methyl (Z)-2-(((4-fluorophenyl)sulfonyl)methyl)-3-phenylacrylate (**3b**)

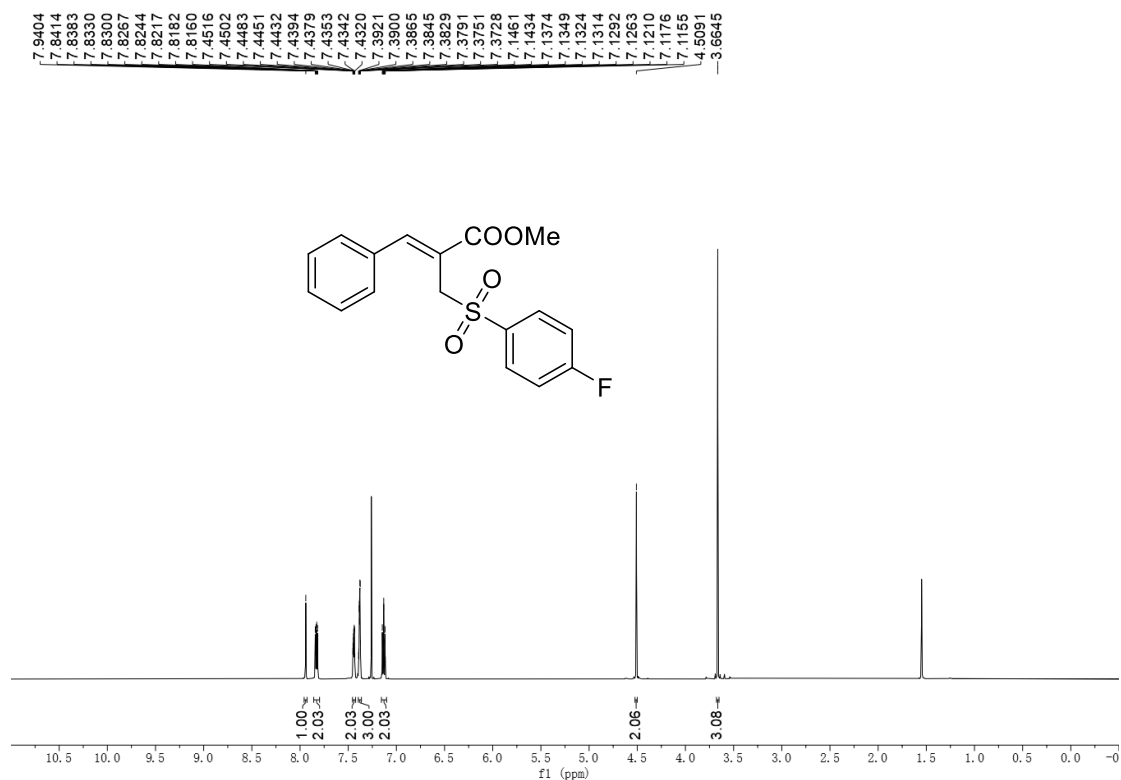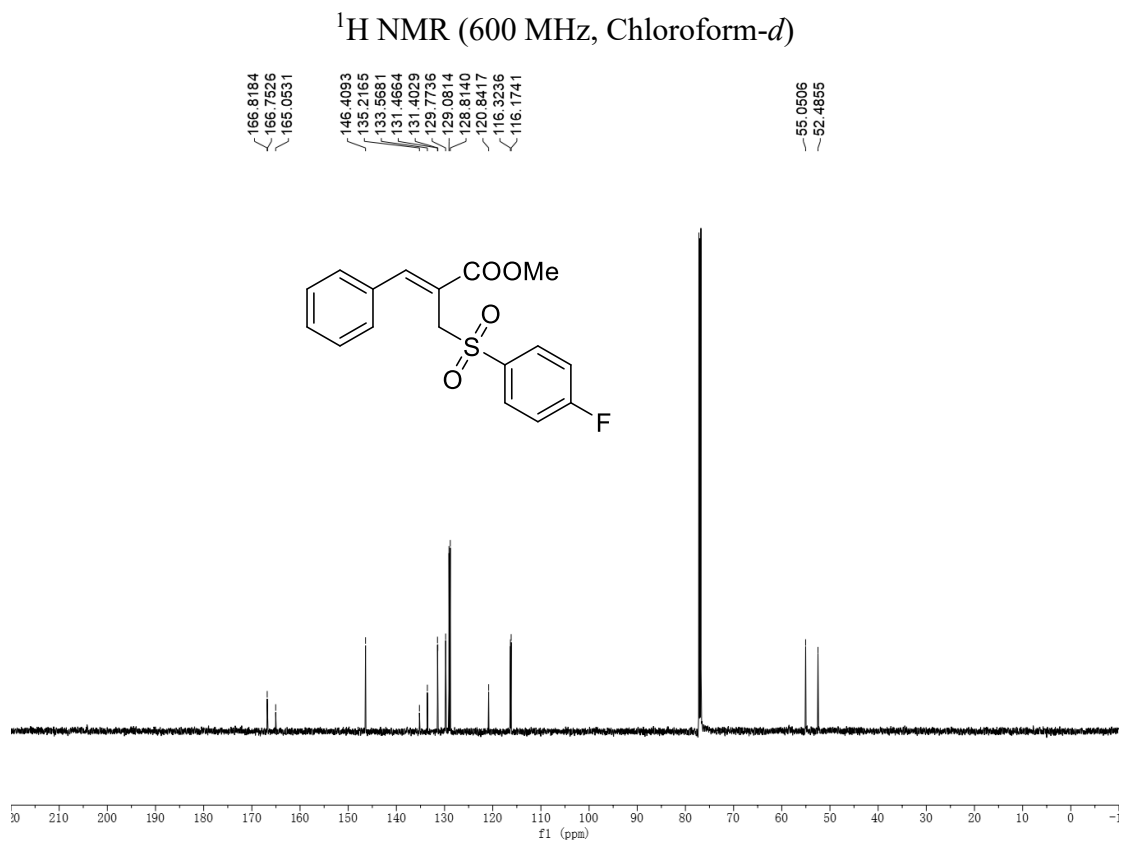

Methyl (Z)-2-(((4-chlorophenyl)sulfonyl)methyl)-3-phenylacrylate (**3c**)

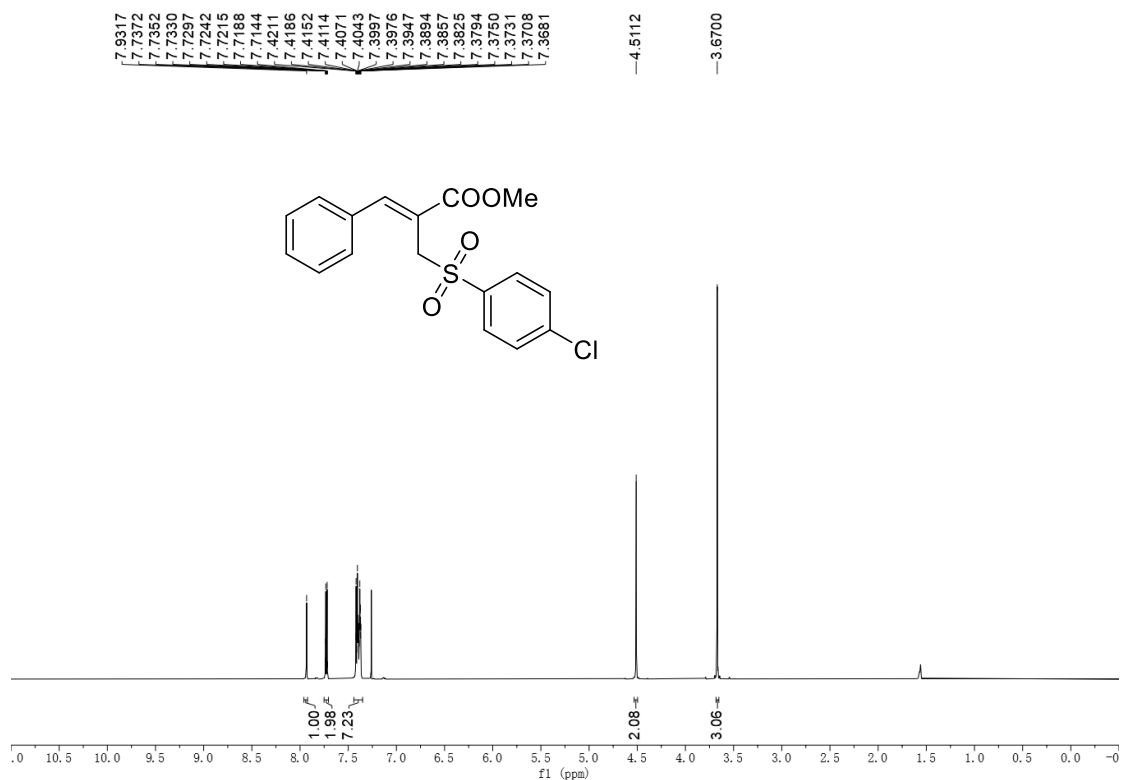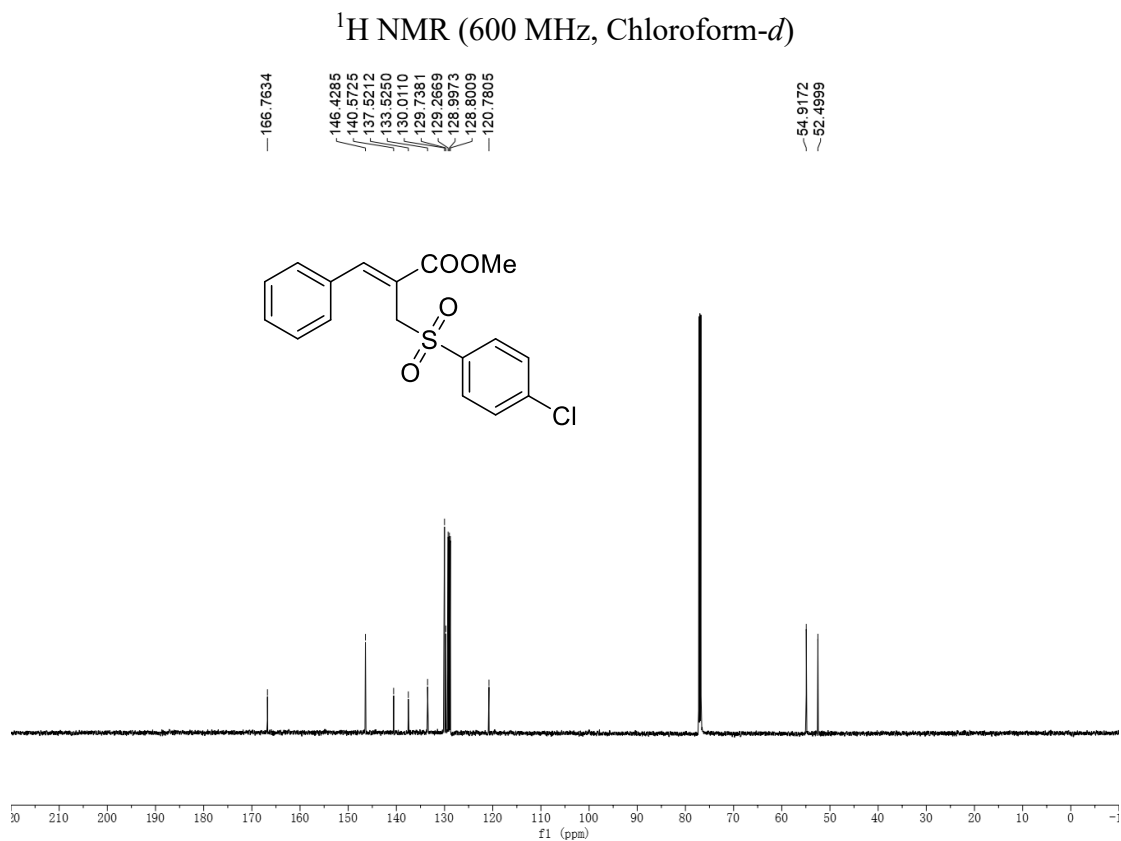

(Z)-2-((methylsulfonyl)methyl)-3-phenylacrylate (**3d**)

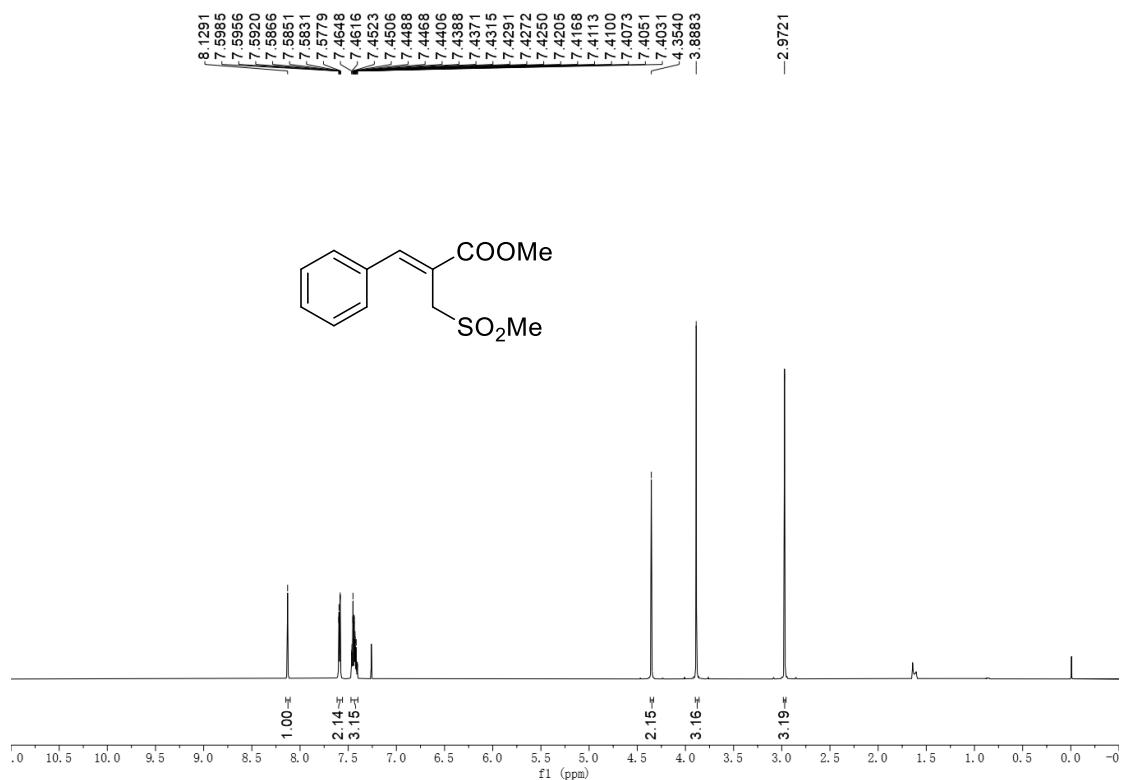

<sup>1</sup>H NMR (600 MHz, Chloroform-*d*)

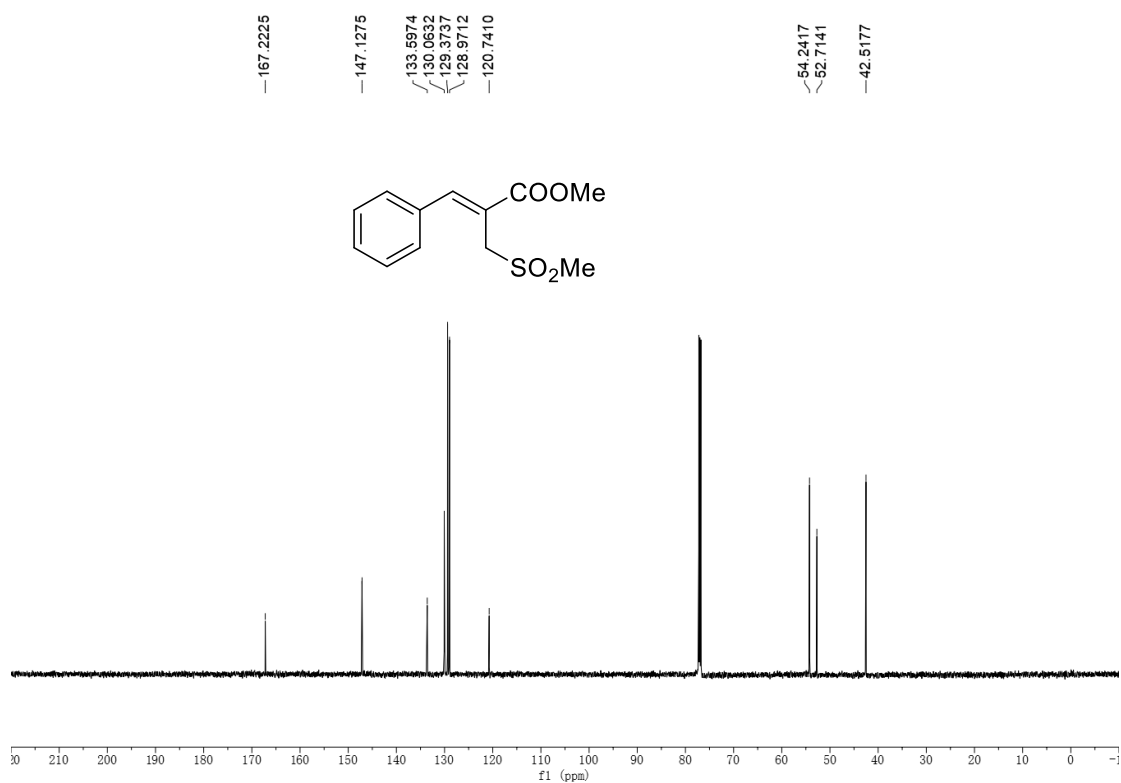

<sup>13</sup>C NMR (151 MHz, Chloroform-*d*)

Methyl (Z)-2-((*tert*-butylsulfonyl)methyl)-3-phenylacrylate (**3e**)

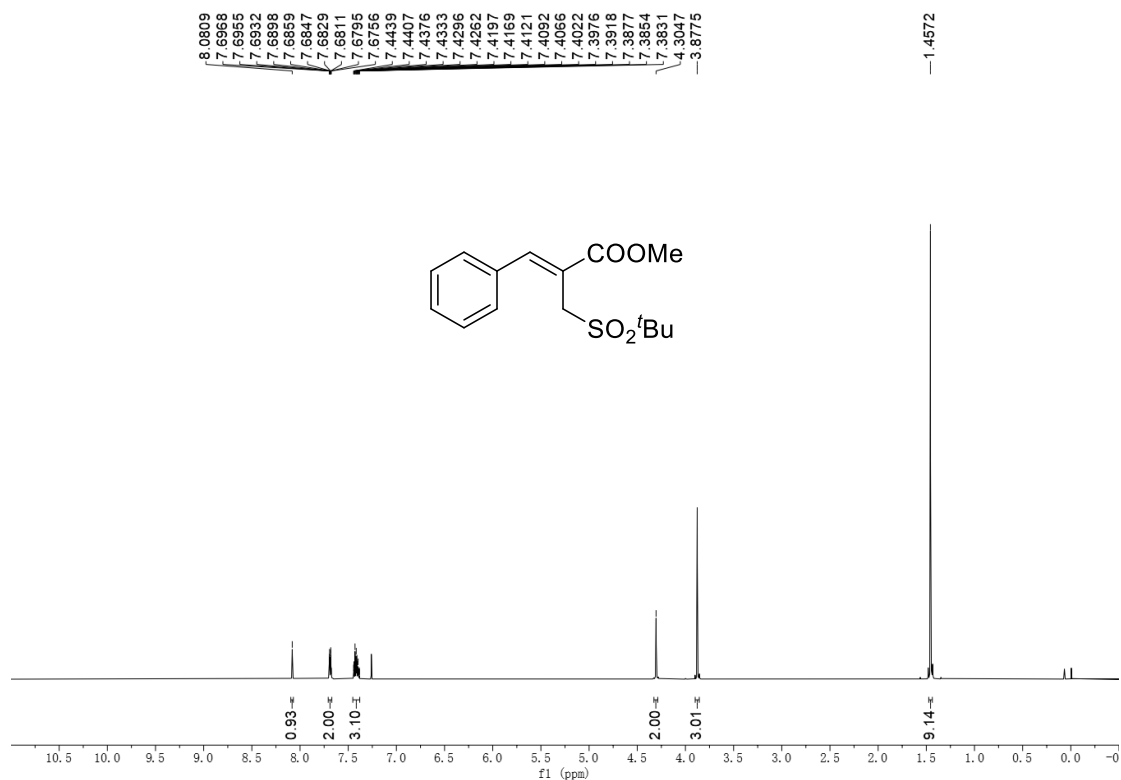

<sup>1</sup>H NMR (600 MHz, Chloroform-*d*)

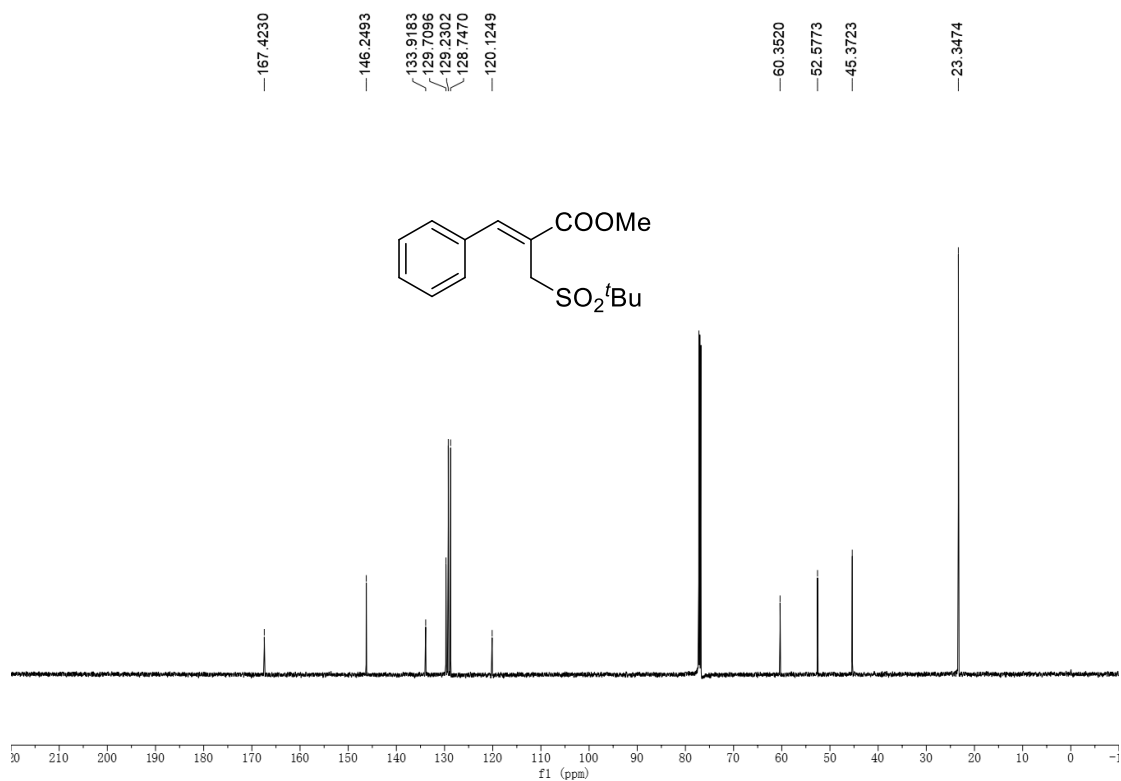

<sup>13</sup>C NMR (151 MHz, Chloroform-*d*)



Methyl (*E*)-2-(phenoxyethyl)-3-phenylacrylate (**3f**)

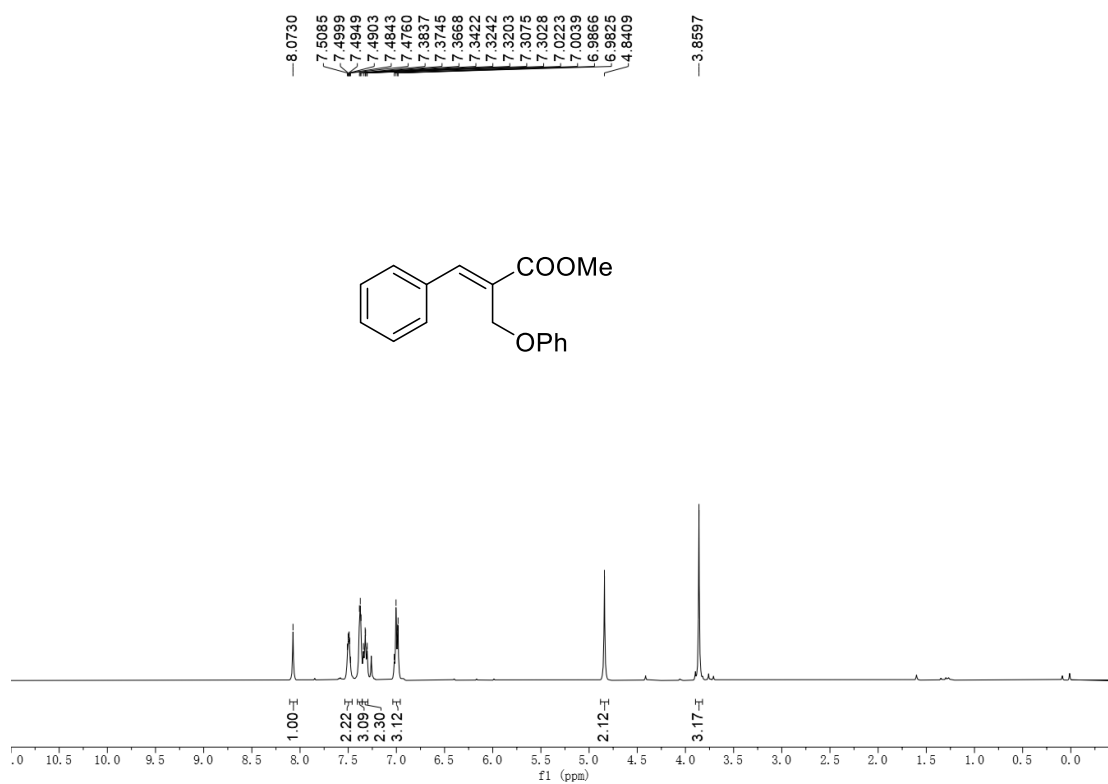

<sup>1</sup>H NMR (400 MHz, Chloroform-*d*)

Ethyl (Z)-3-phenyl-2-((phenylsulfonyl)methyl)acrylate (**3g**)

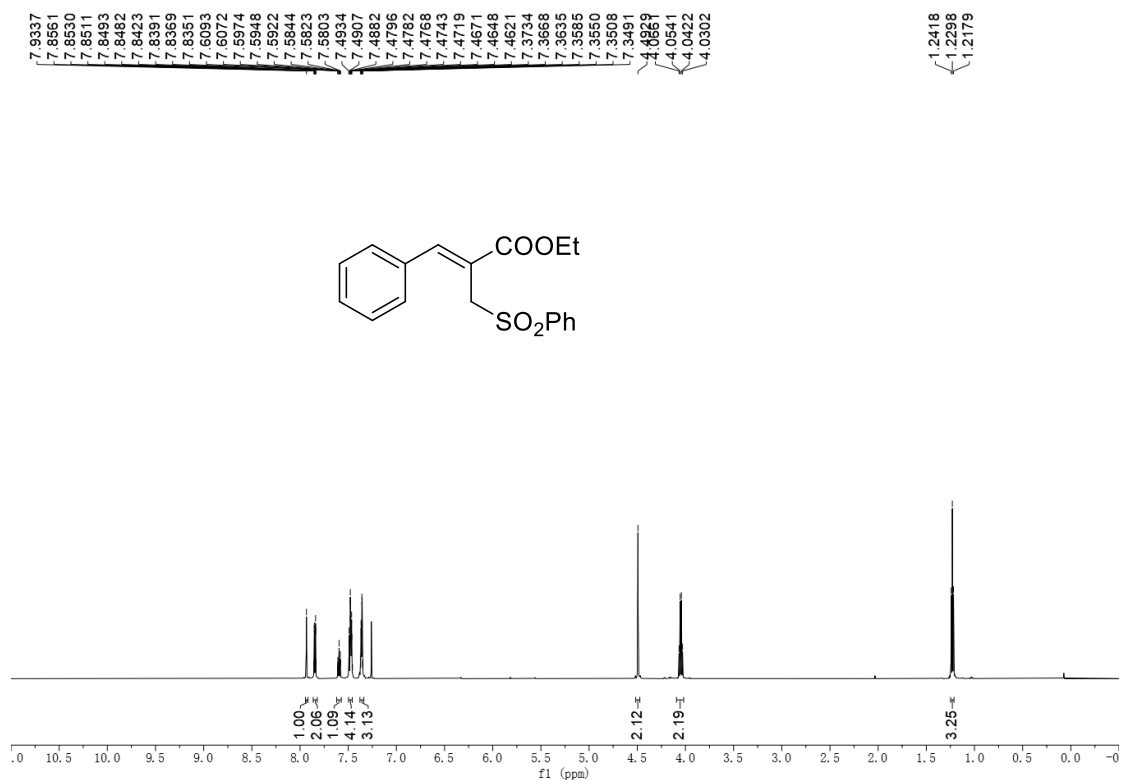

<sup>1</sup>H NMR (600 MHz, Chloroform-*d*)

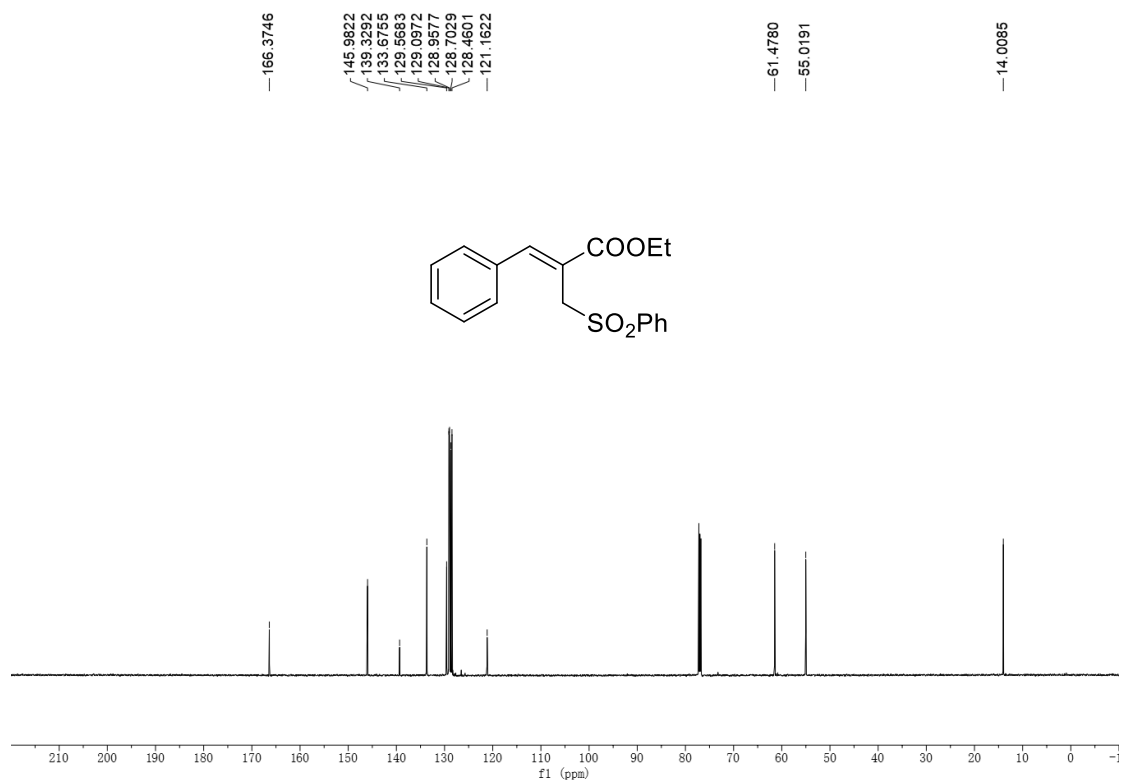

<sup>13</sup>C NMR (151 MHz, Chloroform-*d*)

*Tert*-butyl (*Z*)-3-phenyl-2-((phenylsulfonyl)methyl)acrylate (**3h**)

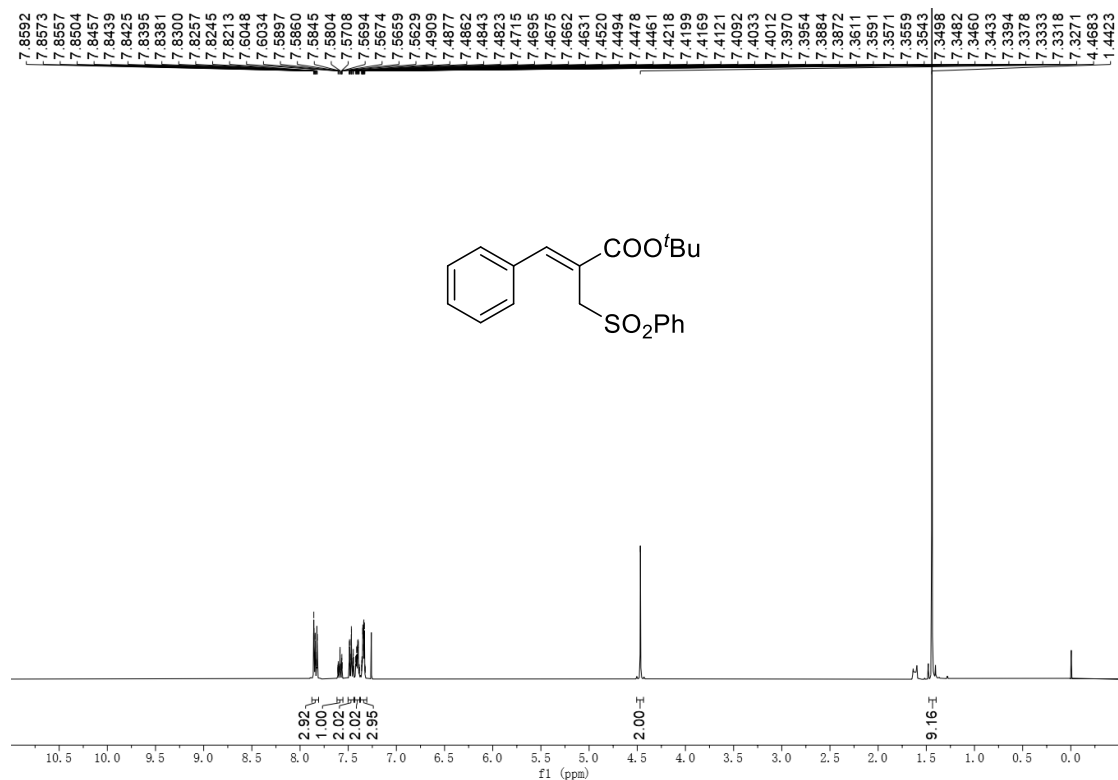

<sup>1</sup>H NMR (400 MHz, Chloroform-*d*)

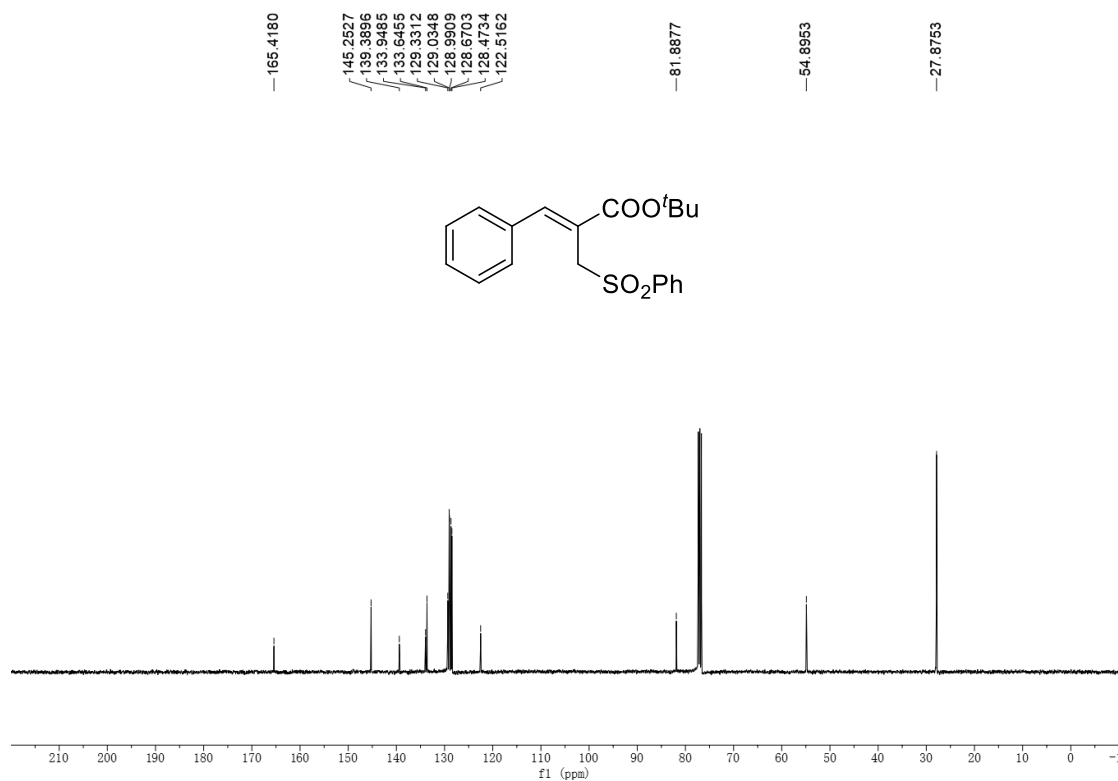

<sup>13</sup>C NMR (101 MHz, Chloroform-*d*)

(Z)-3-phenyl-2-((phenylsulfonyl)methyl)acrylic acid (**3i**)

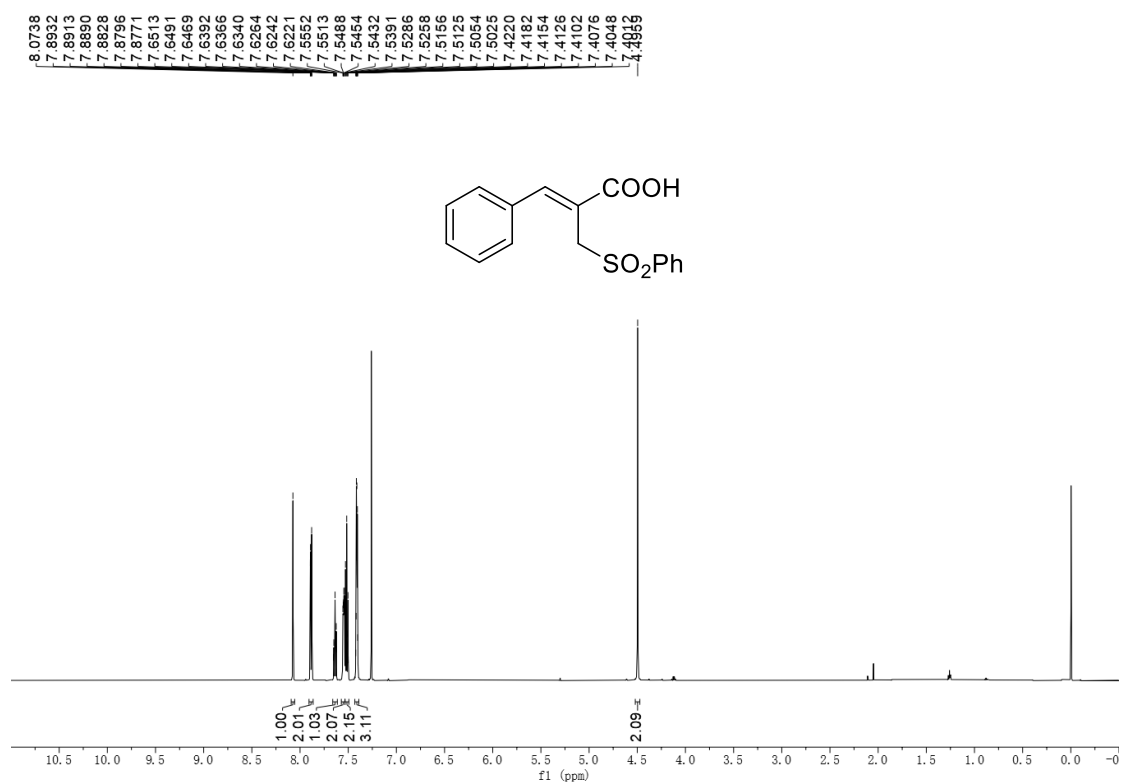

<sup>1</sup>H NMR (600 MHz, Chloroform-*d*)

(Z)-N,3-diphenyl-2-((phenylsulfonyl)methyl)acrylamide (**3j**)

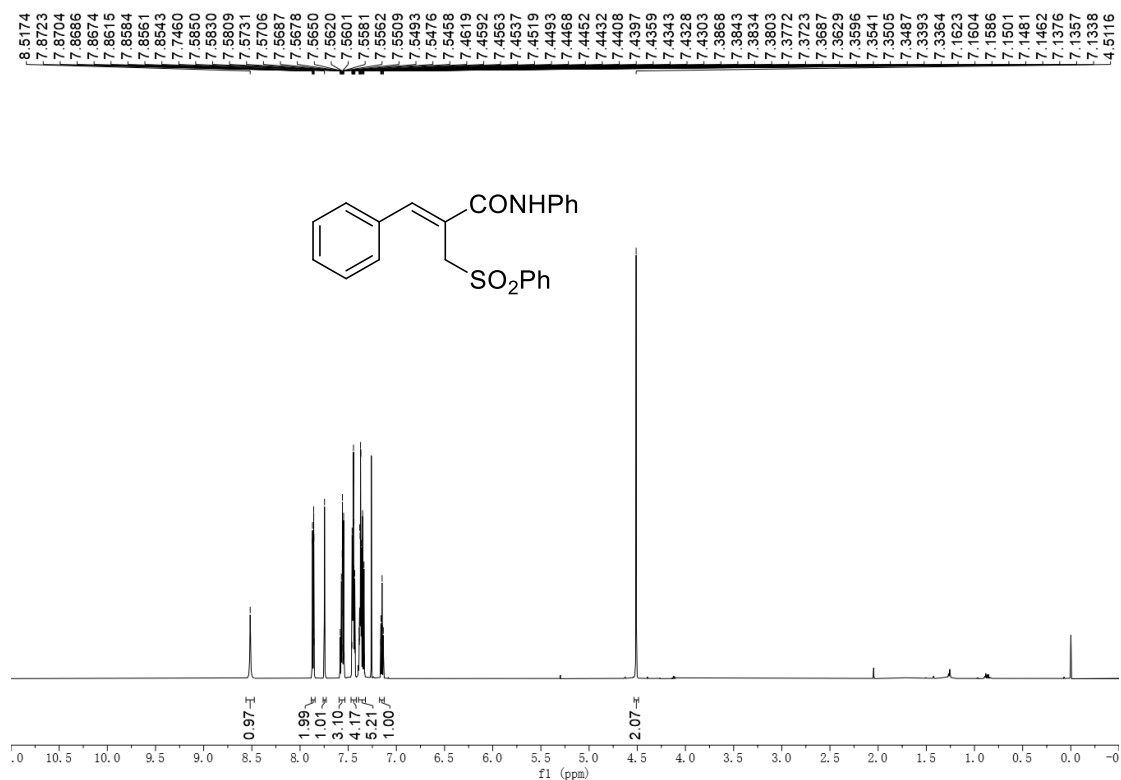

<sup>1</sup>H NMR (600 MHz, Chloroform-*d*)

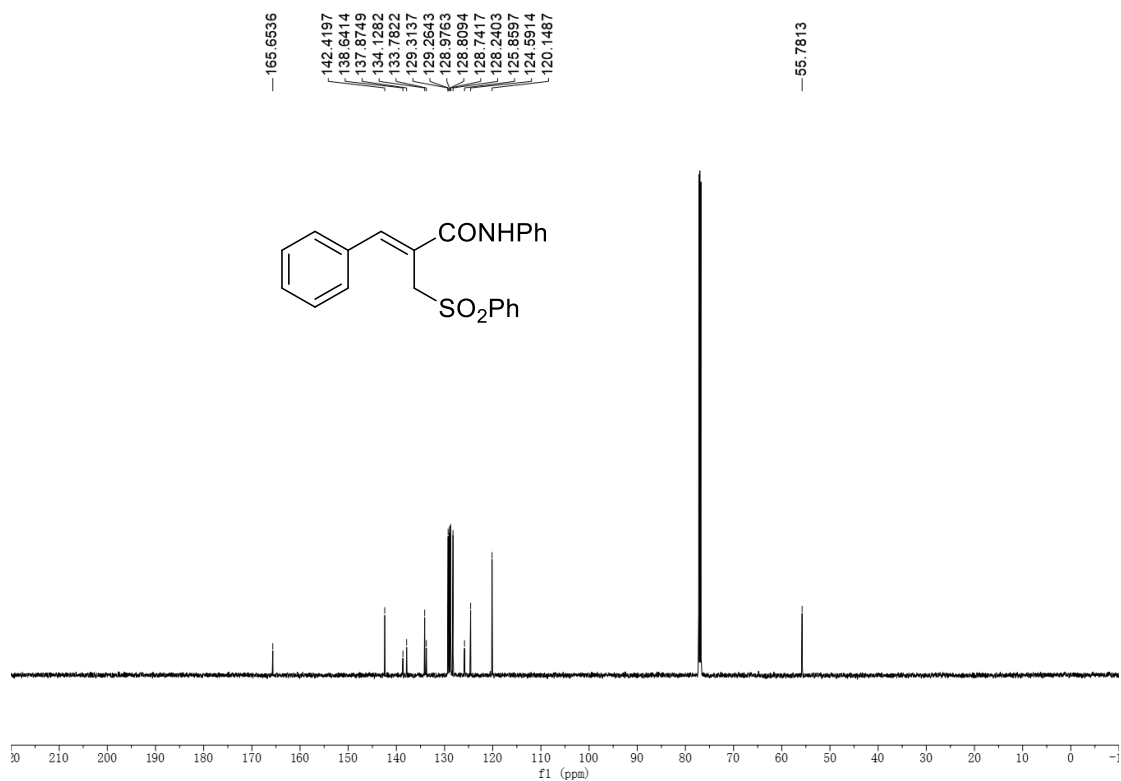

<sup>13</sup>C NMR (151 MHz, Chloroform-*d*)

Methyl (*E*)-2-methyl-3-phenylacrylate (**3k**)

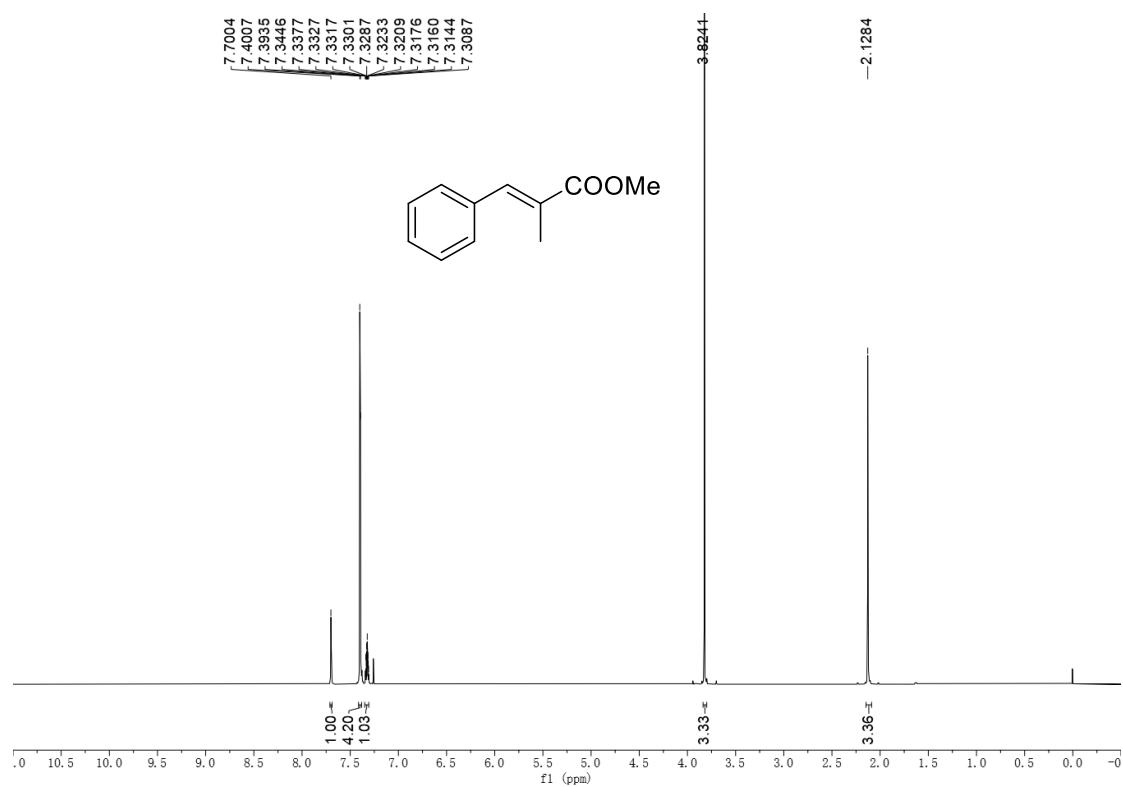

<sup>1</sup>H NMR (600 MHz, Chloroform-*d*)

Methyl 2-benzyl-3-(phenylsulfonyl)propanoate (**2a**)

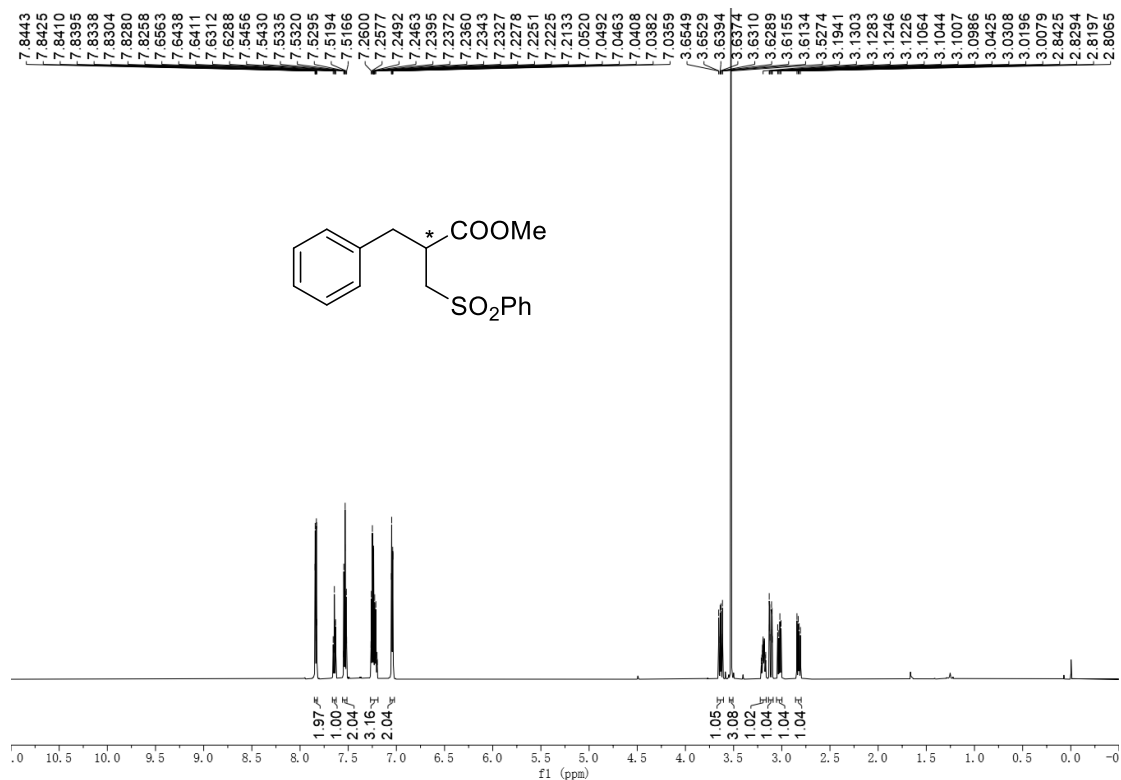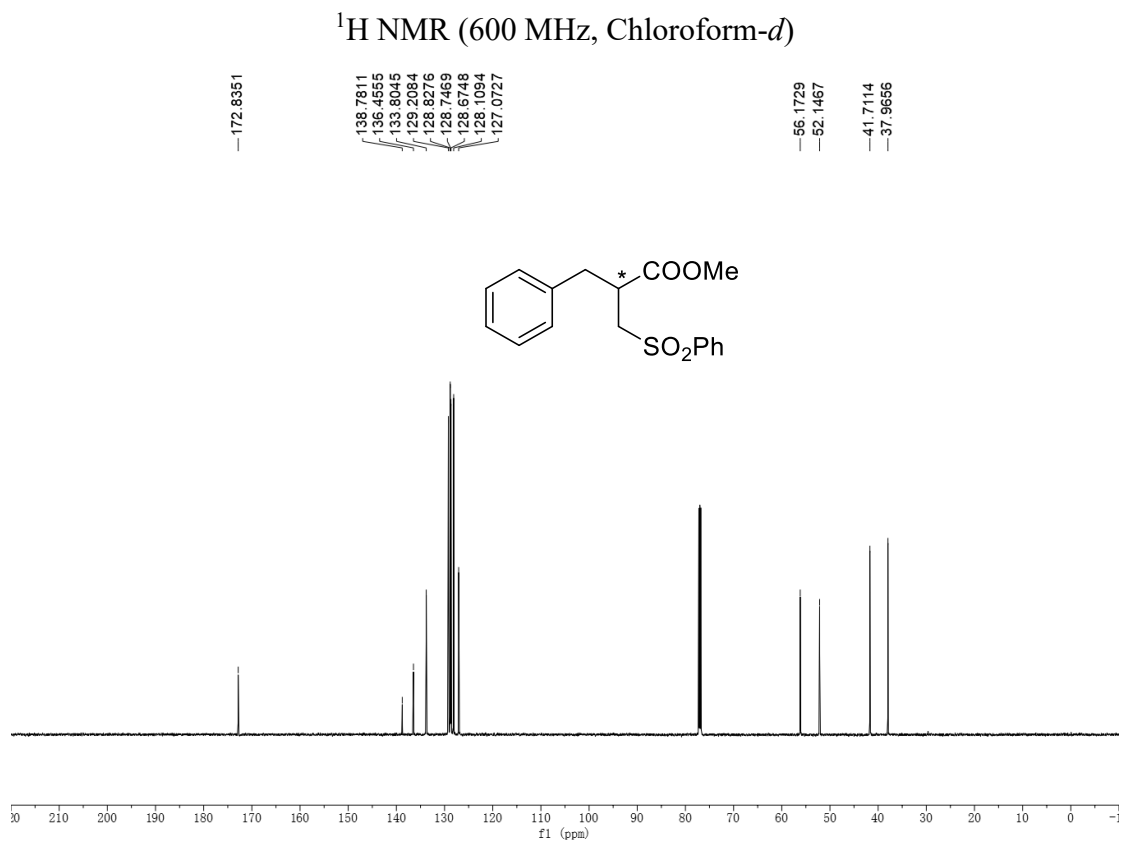

Methyl 3-phenyl-2-((phenylsulfonyl)methyl)propanoate-2,3- $d_2$  (**2a-D-1**)

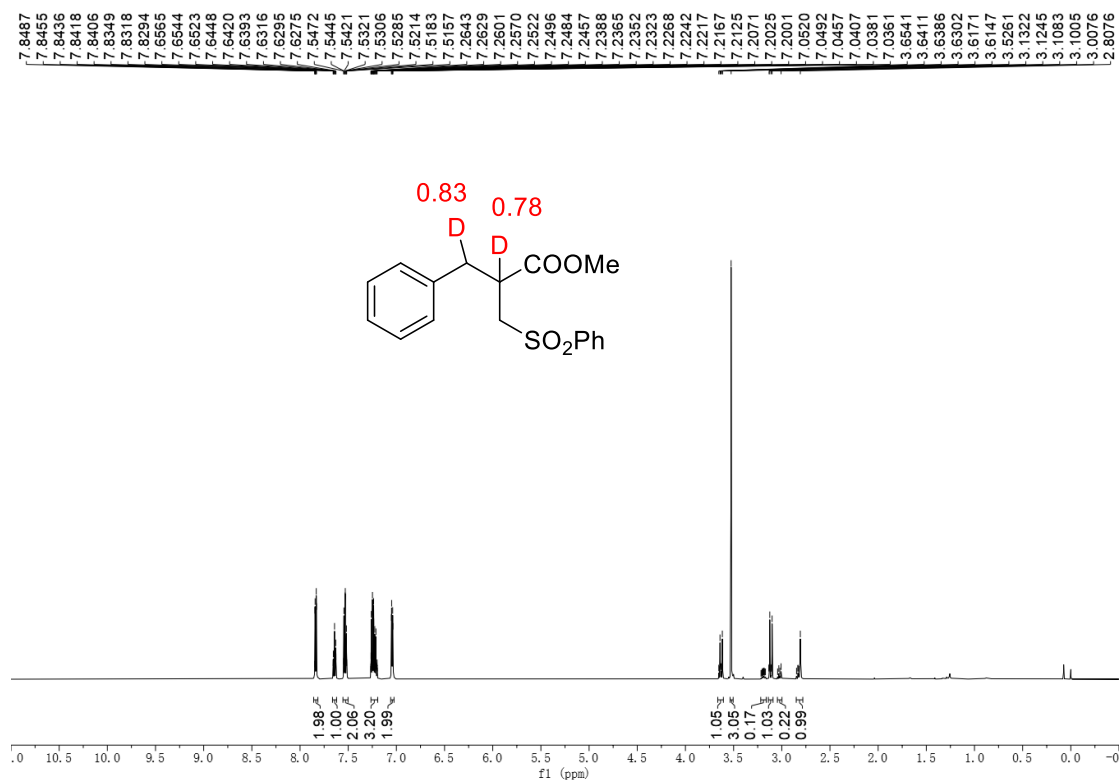

<sup>1</sup>H NMR (600 MHz, Chloroform-*d*)

Methyl 2-benzyl-3-(phenylsulfonyl)propanoate (**2a-D-2**)

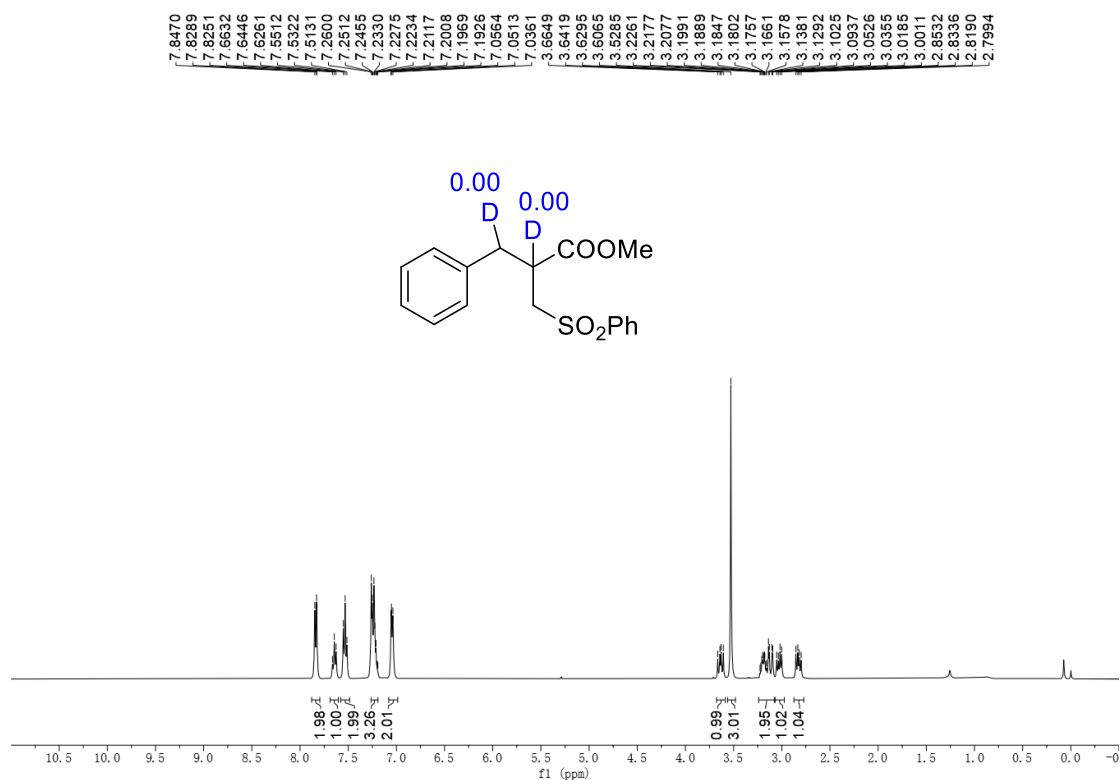

<sup>1</sup>H NMR (400 MHz, Chloroform-*d*)



Methyl 2-(4-methylbenzyl)-3-(phenylsulfonyl)propanoate (**2b**)

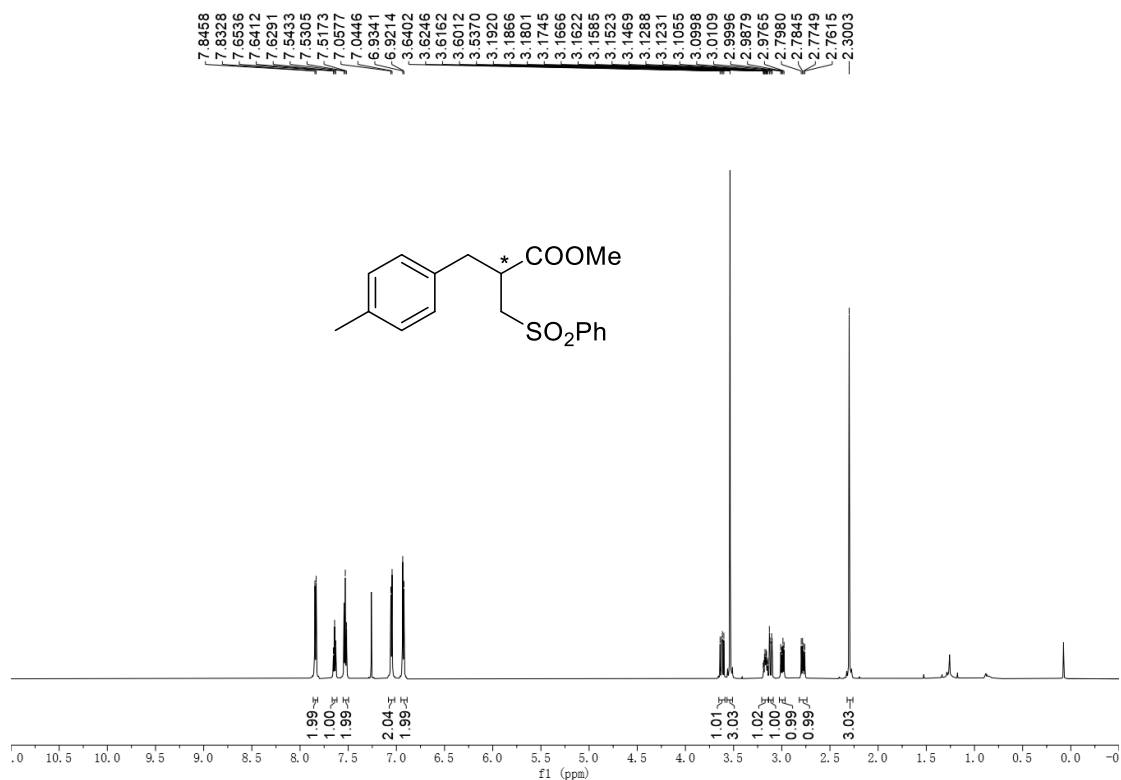

<sup>1</sup>H NMR (600 MHz, Chloroform-*d*)

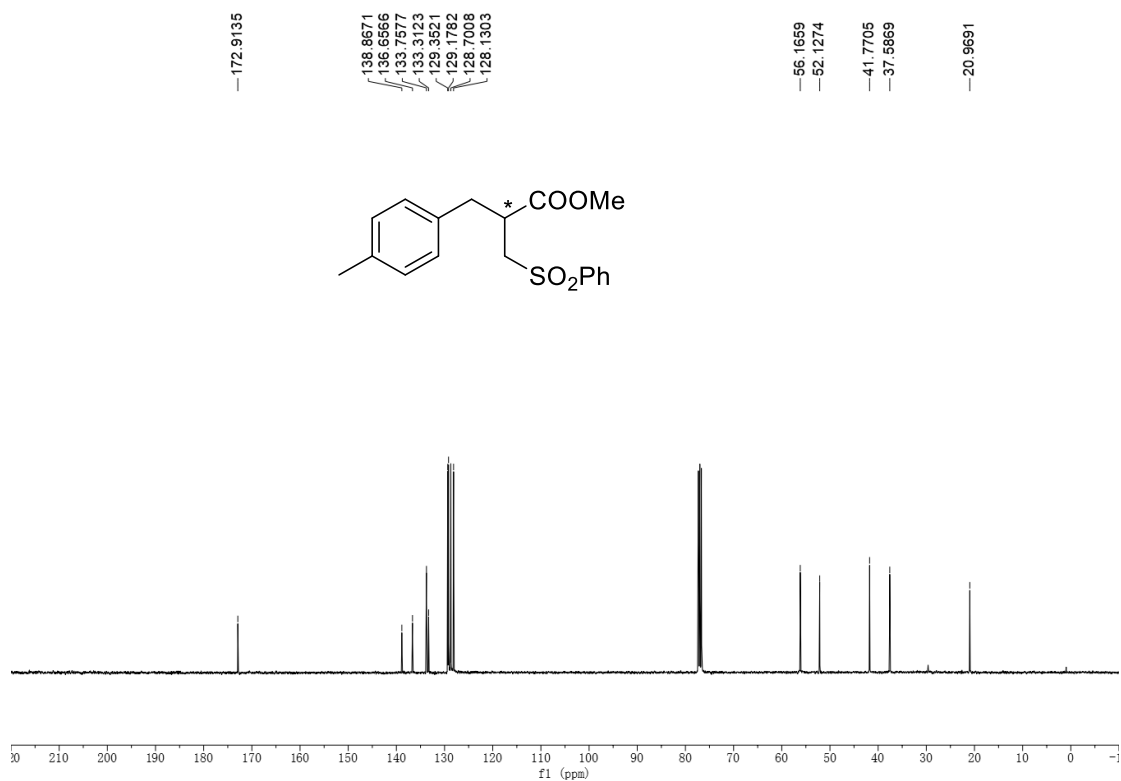

<sup>13</sup>C NMR (101 MHz, Chloroform-*d*)

Methyl 2-(4-methoxybenzyl)-3-(phenylsulfonyl)propanoate (**2c**)

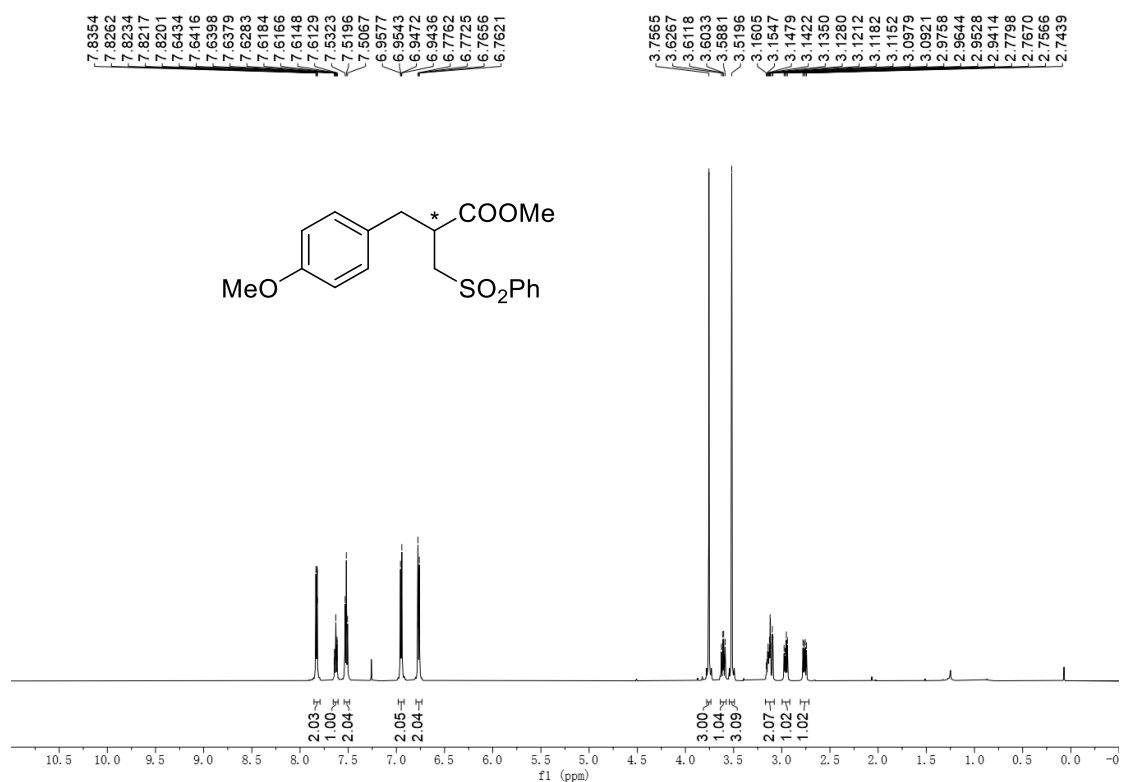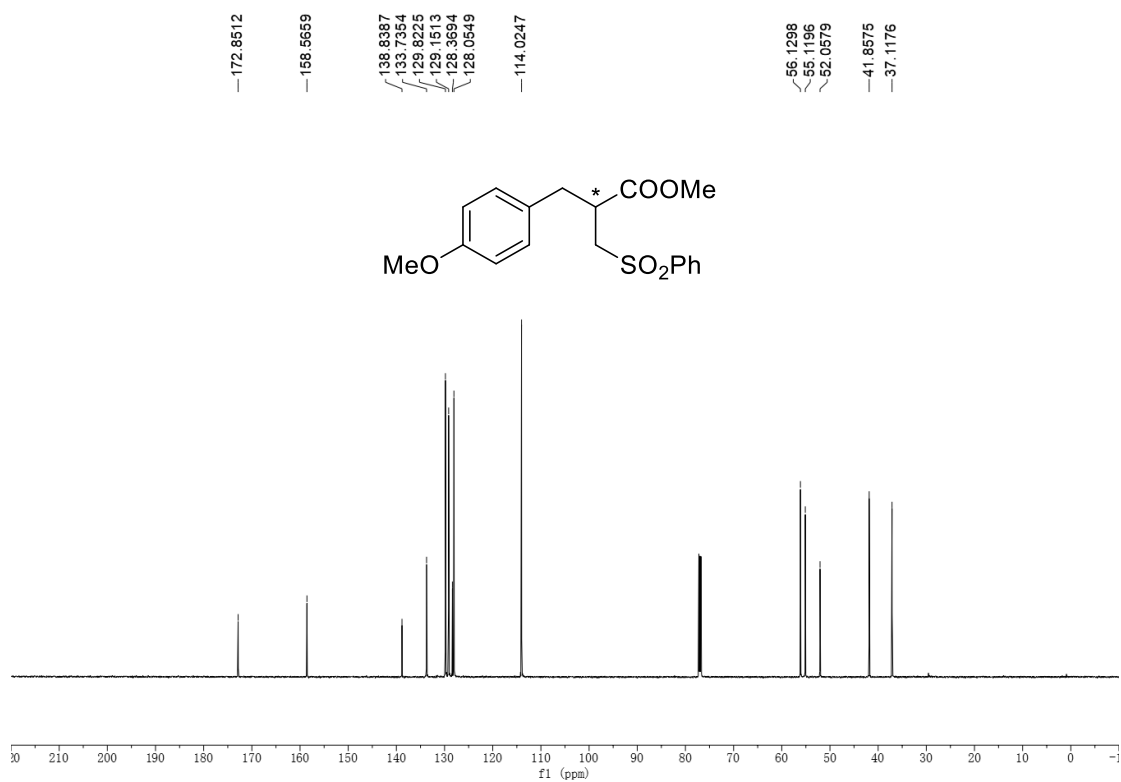

Methyl 2-(4-(benzyloxy)benzyl)-3-(phenylsulfonyl)propanoate (**2d**)

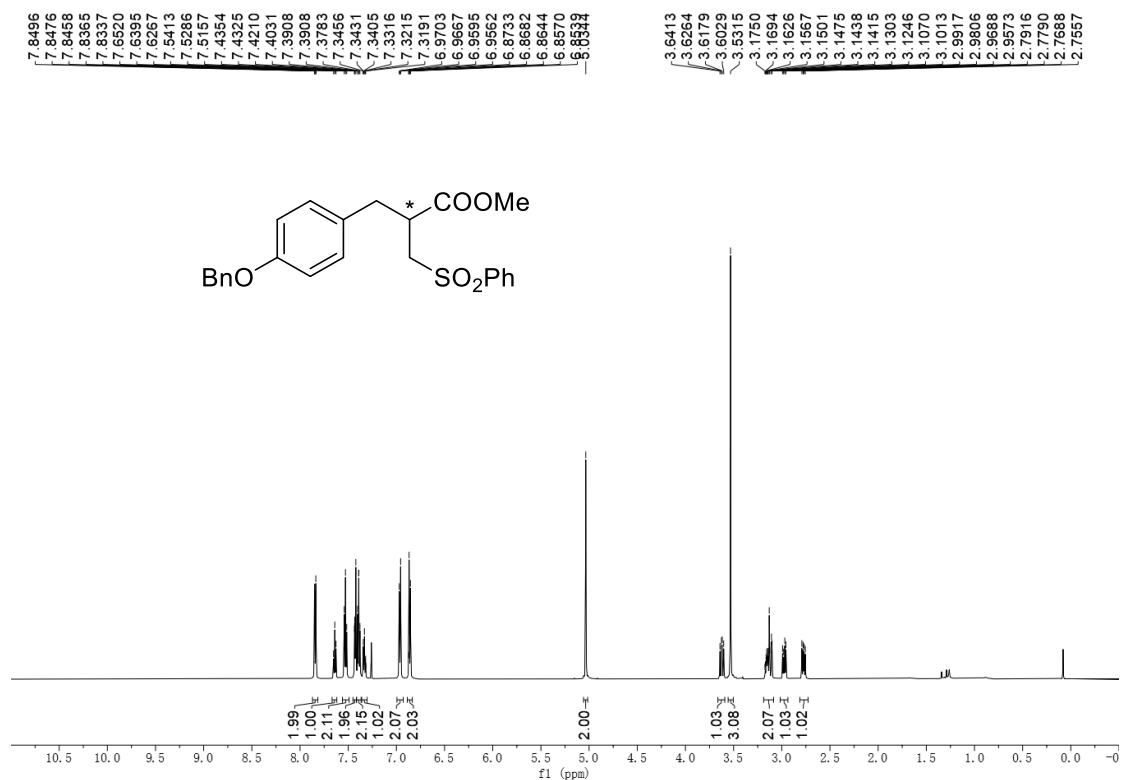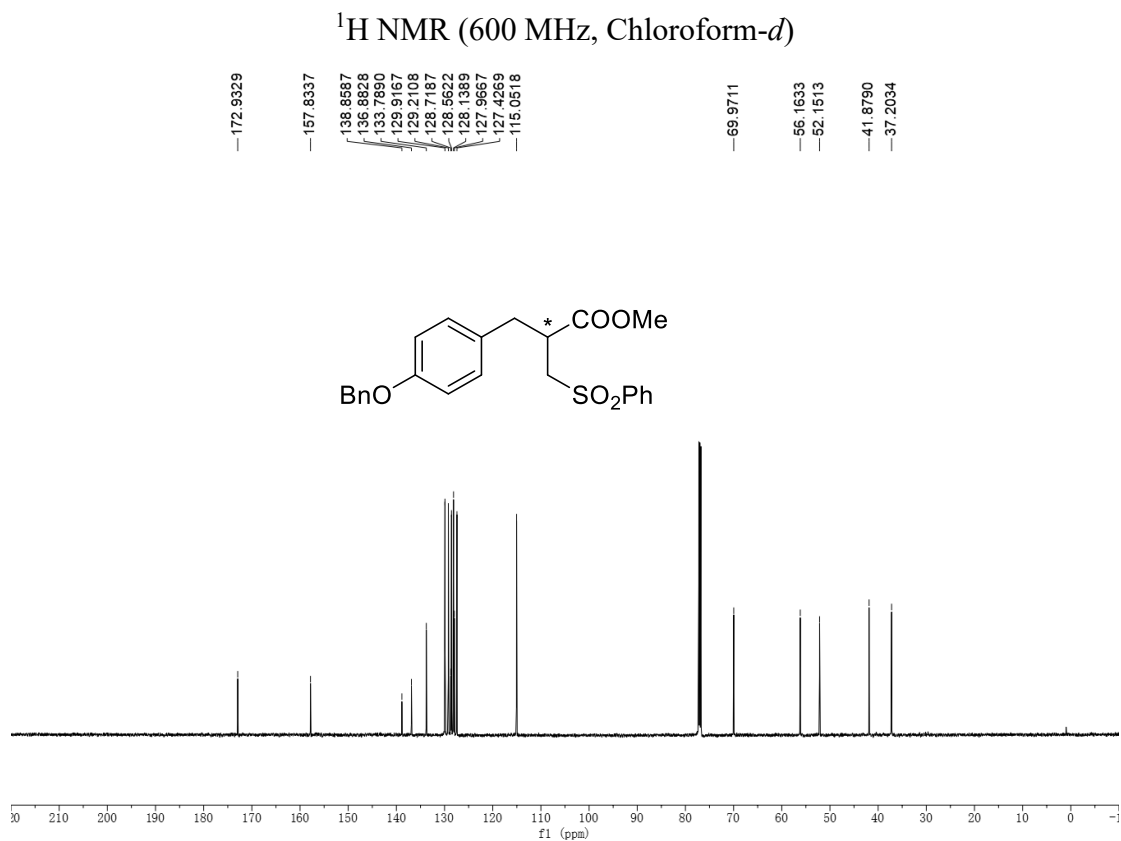

|         |         |         |         |         |         |         |         |         |         |         |         |         |         |         |         |         |         |         |         |         |         |         |         |         |         |         |         |         |         |         |         |         |         |         |         |         |         |         |         |         |         |         |         |         |         |         |         |         |         |         |         |         |         |         |         |         |         |         |         |         |         |         |         |         |         |         |         |         |         |         |         |         |         |         |         |         |         |         |         |         |         |         |         |         |         |         |         |         |         |         |         |         |         |         |         |         |         |         |         |         |         |         |         |         |         |         |         |         |         |         |         |         |         |         |         |         |         |         |         |         |         |         |         |         |         |         |         |         |         |         |         |         |         |         |         |         |         |         |         |         |         |         |         |         |         |         |         |         |         |         |         |         |         |         |         |         |         |         |         |         |         |         |         |         |         |         |         |         |         |         |         |         |         |         |         |         |         |         |         |         |         |         |         |         |         |         |         |         |         |         |         |         |         |         |         |         |         |         |         |         |         |         |         |         |         |         |         |         |         |         |         |         |         |         |         |         |         |         |         |         |         |         |         |         |         |         |         |         |         |         |         |         |         |         |         |         |         |         |         |         |         |         |         |         |         |         |         |         |         |         |         |         |         |         |         |         |         |         |         |         |         |         |         |         |         |         |         |         |         |         |         |         |         |         |         |         |         |         |         |         |         |         |         |         |         |         |         |         |         |         |         |         |         |         |         |         |         |         |         |         |         |         |         |         |         |         |         |         |         |         |         |         |         |         |         |         |         |         |         |         |         |         |         |         |         |         |         |         |         |         |         |         |         |         |         |         |         |         |         |         |         |         |         |         |         |         |         |         |         |         |         |         |         |         |         |         |         |         |         |         |         |         |         |         |         |         |         |         |         |         |       |
|---------|---------|---------|---------|---------|---------|---------|---------|---------|---------|---------|---------|---------|---------|---------|---------|---------|---------|---------|---------|---------|---------|---------|---------|---------|---------|---------|---------|---------|---------|---------|---------|---------|---------|---------|---------|---------|---------|---------|---------|---------|---------|---------|---------|---------|---------|---------|---------|---------|---------|---------|---------|---------|---------|---------|---------|---------|---------|---------|---------|---------|---------|---------|---------|---------|---------|---------|---------|---------|---------|---------|---------|---------|---------|---------|---------|---------|---------|---------|---------|---------|---------|---------|---------|---------|---------|---------|---------|---------|---------|---------|---------|---------|---------|---------|---------|---------|---------|---------|---------|---------|---------|---------|---------|---------|---------|---------|---------|---------|---------|---------|---------|---------|---------|---------|---------|---------|---------|---------|---------|---------|---------|---------|---------|---------|---------|---------|---------|---------|---------|---------|---------|---------|---------|---------|---------|---------|---------|---------|---------|---------|---------|---------|---------|---------|---------|---------|---------|---------|---------|---------|---------|---------|---------|---------|---------|---------|---------|---------|---------|---------|---------|---------|---------|---------|---------|---------|---------|---------|---------|---------|---------|---------|---------|---------|---------|---------|---------|---------|---------|---------|---------|---------|---------|---------|---------|---------|---------|---------|---------|---------|---------|---------|---------|---------|---------|---------|---------|---------|---------|---------|---------|---------|---------|---------|---------|---------|---------|---------|---------|---------|---------|---------|---------|---------|---------|---------|---------|---------|---------|---------|---------|---------|---------|---------|---------|---------|---------|---------|---------|---------|---------|---------|---------|---------|---------|---------|---------|---------|---------|---------|---------|---------|---------|---------|---------|---------|---------|---------|---------|---------|---------|---------|---------|---------|---------|---------|---------|---------|---------|---------|---------|---------|---------|---------|---------|---------|---------|---------|---------|---------|---------|---------|---------|---------|---------|---------|---------|---------|---------|---------|---------|---------|---------|---------|---------|---------|---------|---------|---------|---------|---------|---------|---------|---------|---------|---------|---------|---------|---------|---------|---------|---------|---------|---------|---------|---------|---------|---------|---------|---------|---------|---------|---------|---------|---------|---------|---------|---------|---------|---------|---------|---------|---------|---------|---------|---------|---------|---------|---------|---------|---------|---------|---------|---------|---------|---------|---------|---------|---------|---------|---------|---------|---------|---------|---------|---------|---------|---------|---------|---------|---------|---------|---------|---------|---------|---------|---------|---------|---------|---------|---------|---------|---------|---------|---------|---------|---------|---------|---------|---------|-------|
| -8.2027 | -8.1997 | -8.1962 | -8.1821 | -8.1783 | -8.1754 | -8.1725 | -8.1696 | -8.1667 | -8.1638 | -8.1609 | -8.1580 | -8.1551 | -8.1522 | -8.1493 | -8.1464 | -8.1435 | -8.1406 | -8.1377 | -8.1348 | -8.1319 | -8.1290 | -8.1261 | -8.1232 | -8.1203 | -8.1174 | -8.1145 | -8.1116 | -8.1087 | -8.1058 | -8.1029 | -8.1000 | -8.0971 | -8.0942 | -8.0913 | -8.0884 | -8.0855 | -8.0826 | -8.0797 | -8.0768 | -8.0739 | -8.0710 | -8.0681 | -8.0652 | -8.0623 | -8.0594 | -8.0565 | -8.0536 | -8.0507 | -8.0478 | -8.0449 | -8.0420 | -8.0391 | -8.0362 | -8.0333 | -8.0304 | -8.0275 | -8.0246 | -8.0217 | -8.0188 | -8.0159 | -8.0130 | -8.0101 | -8.0072 | -8.0043 | -8.0014 | -7.9985 | -7.9956 | -7.9927 | -7.9898 | -7.9869 | -7.9840 | -7.9811 | -7.9782 | -7.9753 | -7.9724 | -7.9695 | -7.9666 | -7.9637 | -7.9608 | -7.9579 | -7.9550 | -7.9521 | -7.9492 | -7.9463 | -7.9434 | -7.9405 | -7.9376 | -7.9347 | -7.9318 | -7.9289 | -7.9260 | -7.9231 | -7.9202 | -7.9173 | -7.9144 | -7.9115 | -7.9086 | -7.9057 | -7.9028 | -7.8999 | -7.8970 | -7.8941 | -7.8912 | -7.8883 | -7.8854 | -7.8825 | -7.8796 | -7.8767 | -7.8738 | -7.8709 | -7.8680 | -7.8651 | -7.8622 | -7.8593 | -7.8564 | -7.8535 | -7.8506 | -7.8477 | -7.8448 | -7.8419 | -7.8390 | -7.8361 | -7.8332 | -7.8303 | -7.8274 | -7.8245 | -7.8216 | -7.8187 | -7.8158 | -7.8129 | -7.8100 | -7.8071 | -7.8042 | -7.8013 | -7.7984 | -7.7955 | -7.7926 | -7.7897 | -7.7868 | -7.7839 | -7.7810 | -7.7781 | -7.7752 | -7.7723 | -7.7694 | -7.7665 | -7.7636 | -7.7607 | -7.7578 | -7.7549 | -7.7520 | -7.7491 | -7.7462 | -7.7433 | -7.7404 | -7.7375 | -7.7346 | -7.7317 | -7.7288 | -7.7259 | -7.7230 | -7.7201 | -7.7172 | -7.7143 | -7.7114 | -7.7085 | -7.7056 | -7.7027 | -7.6998 | -7.6969 | -7.6940 | -7.6911 | -7.6882 | -7.6853 | -7.6824 | -7.6795 | -7.6766 | -7.6737 | -7.6708 | -7.6679 | -7.6650 | -7.6621 | -7.6592 | -7.6563 | -7.6534 | -7.6505 | -7.6476 | -7.6447 | -7.6418 | -7.6389 | -7.6360 | -7.6331 | -7.6302 | -7.6273 | -7.6244 | -7.6215 | -7.6186 | -7.6157 | -7.6128 | -7.6099 | -7.6070 | -7.6041 | -7.6012 | -7.5983 | -7.5954 | -7.5925 | -7.5896 | -7.5867 | -7.5838 | -7.5809 | -7.5780 | -7.5751 | -7.5722 | -7.5693 | -7.5664 | -7.5635 | -7.5606 | -7.5577 | -7.5548 | -7.5519 | -7.5490 | -7.5461 | -7.5432 | -7.5403 | -7.5374 | -7.5345 | -7.5316 | -7.5287 | -7.5258 | -7.5229 | -7.5200 | -7.5171 | -7.5142 | -7.5113 | -7.5084 | -7.5055 | -7.5026 | -7.4997 | -7.4968 | -7.4939 | -7.4910 | -7.4881 | -7.4852 | -7.4823 | -7.4794 | -7.4765 | -7.4736 | -7.4707 | -7.4678 | -7.4649 | -7.4620 | -7.4591 | -7.4562 | -7.4533 | -7.4504 | -7.4475 | -7.4446 | -7.4417 | -7.4388 | -7.4359 | -7.4330 | -7.4301 | -7.4272 | -7.4243 | -7.4214 | -7.4185 | -7.4156 | -7.4127 | -7.4098 | -7.4069 | -7.4040 | -7.4011 | -7.3982 | -7.3953 | -7.3924 | -7.3895 | -7.3866 | -7.3837 | -7.3808 | -7.3779 | -7.3750 | -7.3721 | -7.3692 | -7.3663 | -7.3634 | -7.3605 | -7.3576 | -7.3547 | -7.3518 | -7.3489 | -7.3460 | -7.3431 | -7.3402 | -7.3373 | -7.3344 | -7.3315 | -7.3286 | -7.3257 | -7.3228 | -7.3199 | -7.3170 | -7.3141 | -7.3112 | -7.3083 | -7.3054 | -7.3025 | -7.2996 | -7.2967 | -7.2938 | -7.2909 | -7.2880 | -7.2851 | -7.2822 | -7.2793 | -7.2764 | -7.2735 | -7.2706 | -7.2677 | -7.2648 | -7.2619 | -7.2590 | -7.2561 | -7.2532 | -7.2503 | -7.2474 | -7.2445 | -7.2416 | -7.2387 | -7.2358 | -7.2329 | -7.2300 | -7.2271 | -7.2242 | -7.2213 | -7.2184 | -7.2155 | -7.2126 | -7.2097 | -7.2068 | -7.2039 | -7.2010 | -7.1981 | -7.1952 | -7.1923 | -7.1894 | -7.1865 | -7.1836 | -7.1807 | -7.1778 | -7.1749 | -7.1720 | -7.1691 | -7.1662 | -7.1633 | -7.1604 | -7.1575 | -7.1546 | -7.1517 | -7.1488 | -7.1459 | -7.1430 | -7.1401 | -7.1372 | -7.1343 | -7.1314 | -7.1285 | -7.1256 | -7.1227 | -7.1198 | -7.1169 | -7.11 |
|---------|---------|---------|---------|---------|---------|---------|---------|---------|---------|---------|---------|---------|---------|---------|---------|---------|---------|---------|---------|---------|---------|---------|---------|---------|---------|---------|---------|---------|---------|---------|---------|---------|---------|---------|---------|---------|---------|---------|---------|---------|---------|---------|---------|---------|---------|---------|---------|---------|---------|---------|---------|---------|---------|---------|---------|---------|---------|---------|---------|---------|---------|---------|---------|---------|---------|---------|---------|---------|---------|---------|---------|---------|---------|---------|---------|---------|---------|---------|---------|---------|---------|---------|---------|---------|---------|---------|---------|---------|---------|---------|---------|---------|---------|---------|---------|---------|---------|---------|---------|---------|---------|---------|---------|---------|---------|---------|---------|---------|---------|---------|---------|---------|---------|---------|---------|---------|---------|---------|---------|---------|---------|---------|---------|---------|---------|---------|---------|---------|---------|---------|---------|---------|---------|---------|---------|---------|---------|---------|---------|---------|---------|---------|---------|---------|---------|---------|---------|---------|---------|---------|---------|---------|---------|---------|---------|---------|---------|---------|---------|---------|---------|---------|---------|---------|---------|---------|---------|---------|---------|---------|---------|---------|---------|---------|---------|---------|---------|---------|---------|---------|---------|---------|---------|---------|---------|---------|---------|---------|---------|---------|---------|---------|---------|---------|---------|---------|---------|---------|---------|---------|---------|---------|---------|---------|---------|---------|---------|---------|---------|---------|---------|---------|---------|---------|---------|---------|---------|---------|---------|---------|---------|---------|---------|---------|---------|---------|---------|---------|---------|---------|---------|---------|---------|---------|---------|---------|---------|---------|---------|---------|---------|---------|---------|---------|---------|---------|---------|---------|---------|---------|---------|---------|---------|---------|---------|---------|---------|---------|---------|---------|---------|---------|---------|---------|---------|---------|---------|---------|---------|---------|---------|---------|---------|---------|---------|---------|---------|---------|---------|---------|---------|---------|---------|---------|---------|---------|---------|---------|---------|---------|---------|---------|---------|---------|---------|---------|---------|---------|---------|---------|---------|---------|---------|---------|---------|---------|---------|---------|---------|---------|---------|---------|---------|---------|---------|---------|---------|---------|---------|---------|---------|---------|---------|---------|---------|---------|---------|---------|---------|---------|---------|---------|---------|---------|---------|---------|---------|---------|---------|---------|---------|---------|---------|---------|---------|---------|---------|---------|---------|---------|---------|---------|---------|---------|---------|---------|---------|---------|---------|---------|---------|---------|---------|---------|---------|---------|---------|---------|---------|---------|-------|

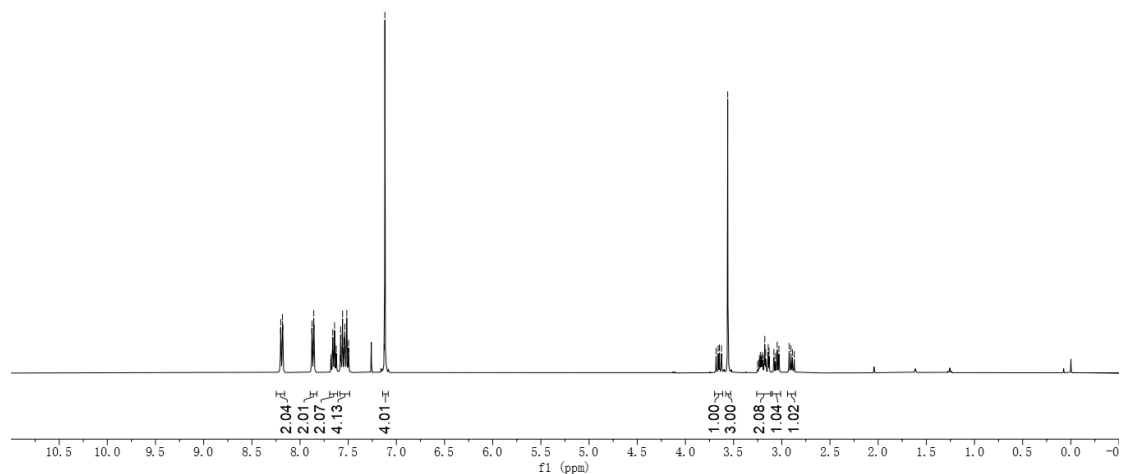

—172.7494  
—165.0398  
—149.9646  
138.7853  
134.1736  
133.8879  
133.6367  
130.1174  
129.9305  
129.3944  
129.3040  
128.5702  
128.1377  
121.9589  
  
—56.1939  
—52.2637  
  
—41.6815  
37.2997

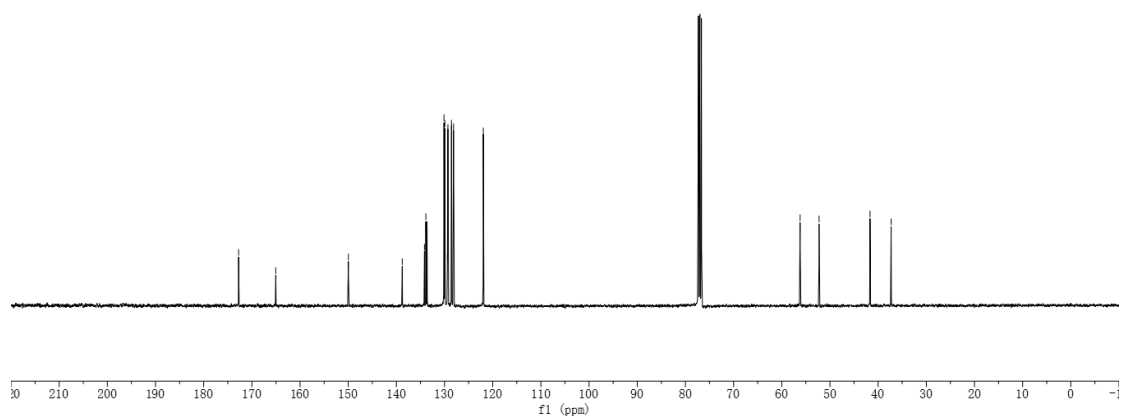

S72

4-(3-Methoxy-3-oxo-2-((phenylsulfonyl)methyl)propyl)phenyl 4-methoxybenzoate

(2f)

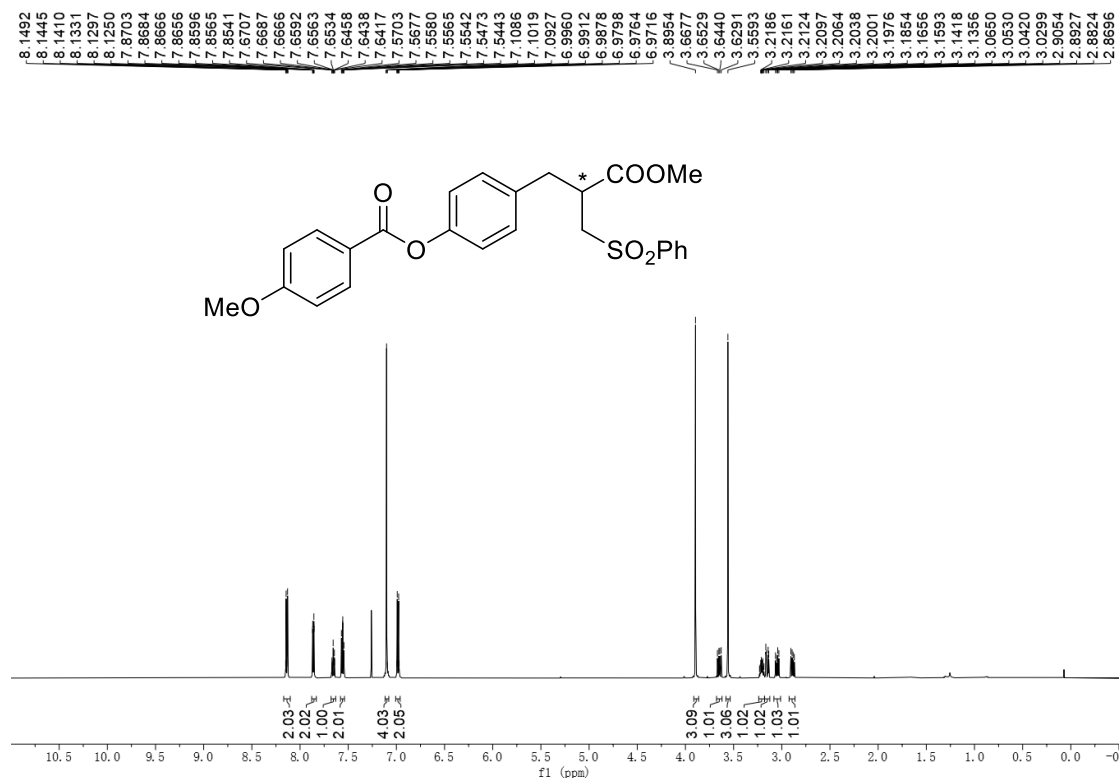

<sup>1</sup>H NMR (600 MHz, Chloroform-*d*)

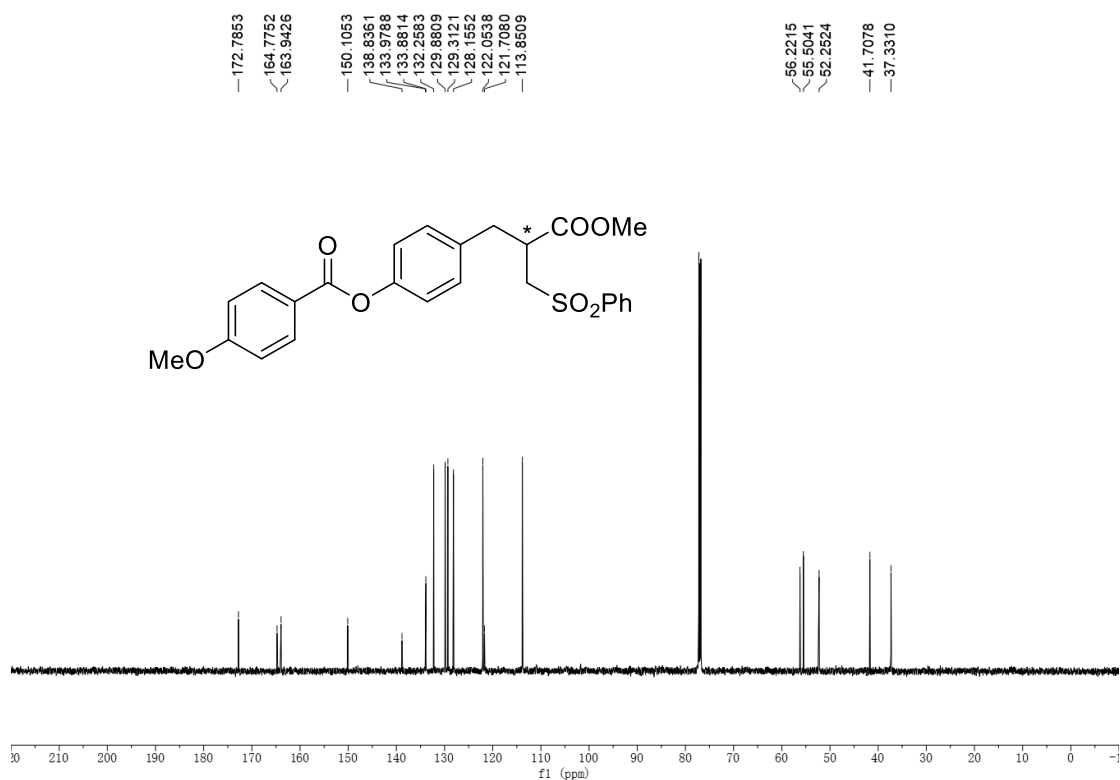

<sup>13</sup>C NMR (151 MHz, Chloroform-*d*)

Methyl 2-(4-(((benzyloxy)carbonyl)oxy)benzyl)-3-(phenylsulfonyl)propanoate (**2g**)

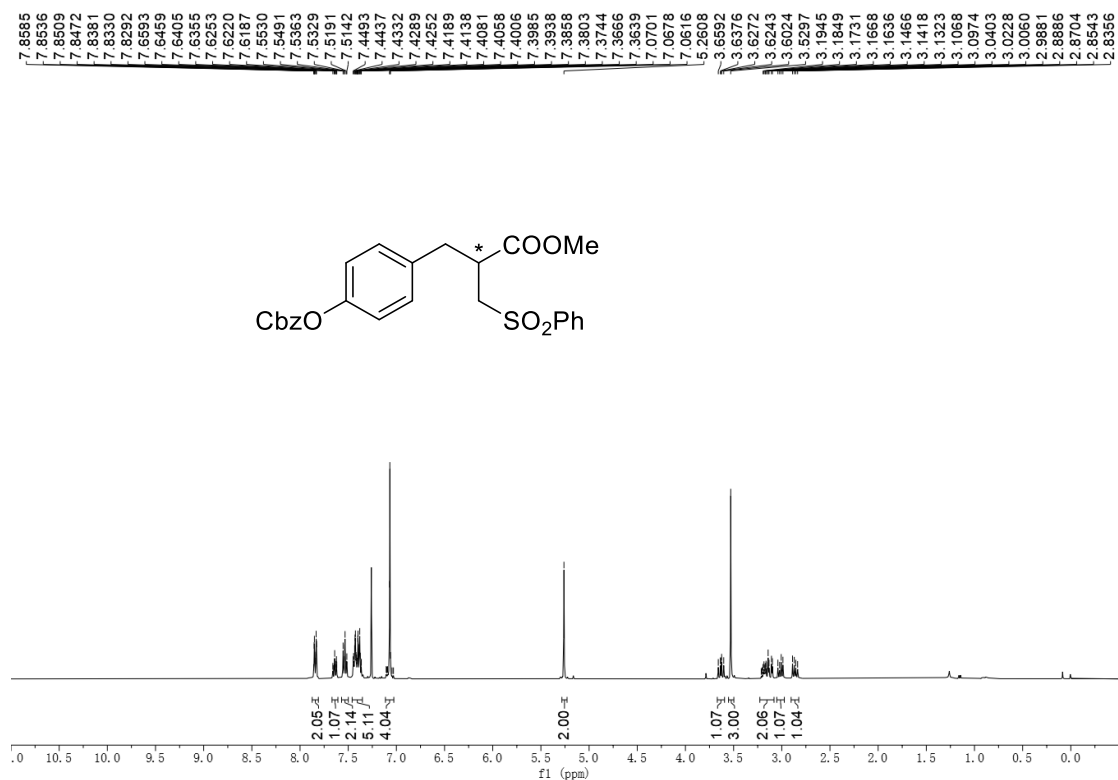

<sup>1</sup>H NMR (400 MHz, Chloroform-*d*)

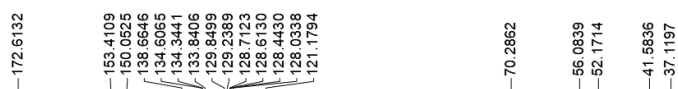

<sup>13</sup>C NMR (101 MHz, Chloroform-*d*)

Methyl 2-(4-hydroxybenzyl)-3-(phenylsulfonyl)propanoate (**2h**)

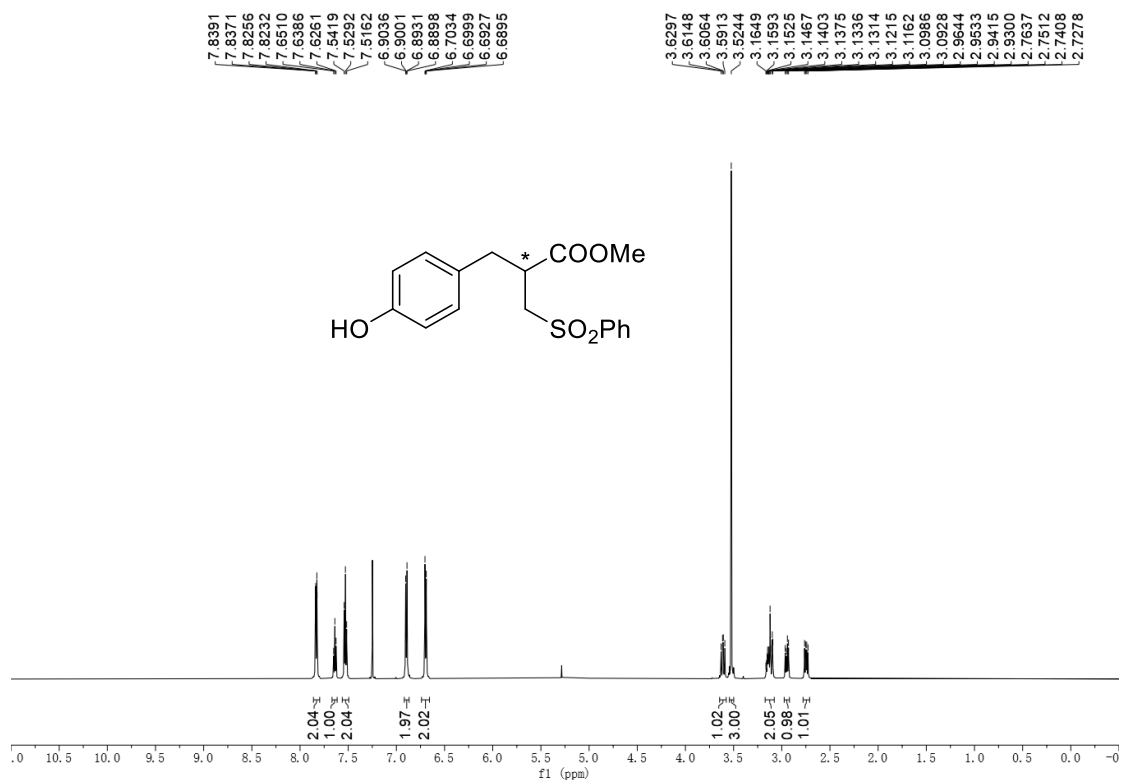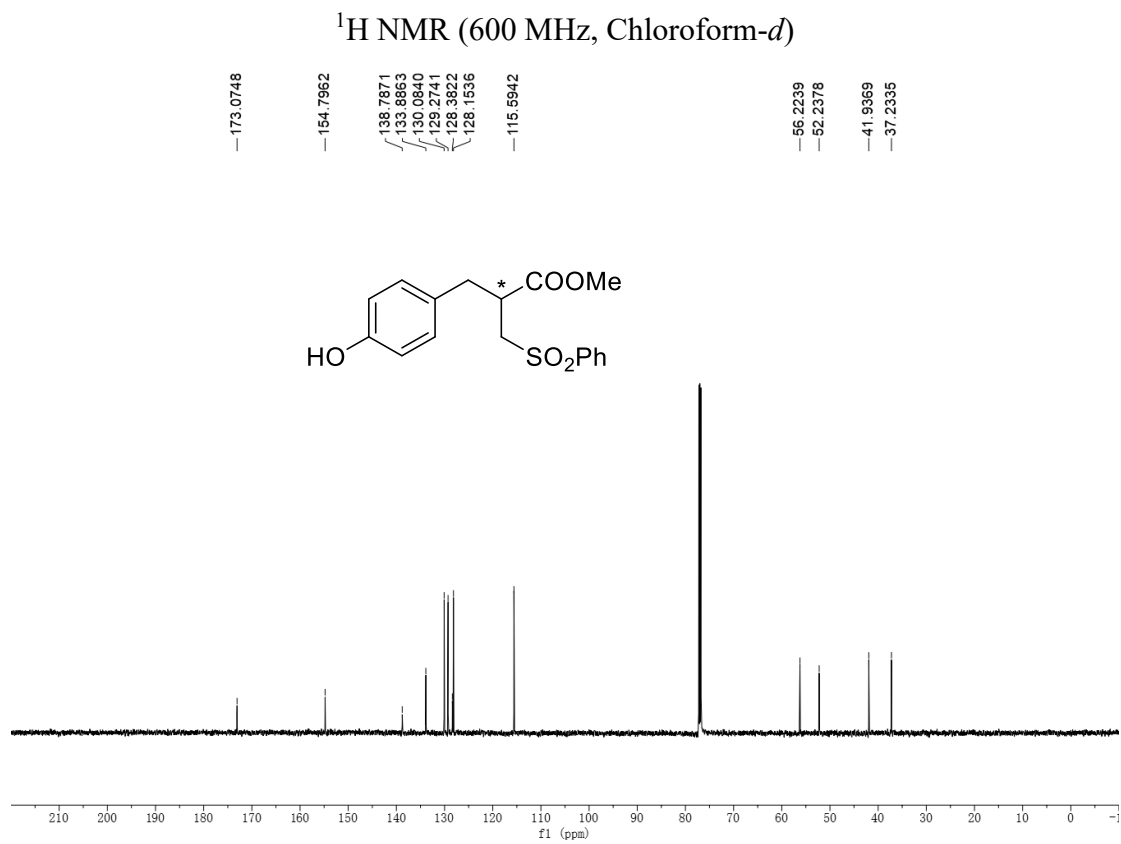

(*S*)-Methyl 2-(4-bromobenzyl)-3-(phenylsulfonyl)propanoate (**2i**)

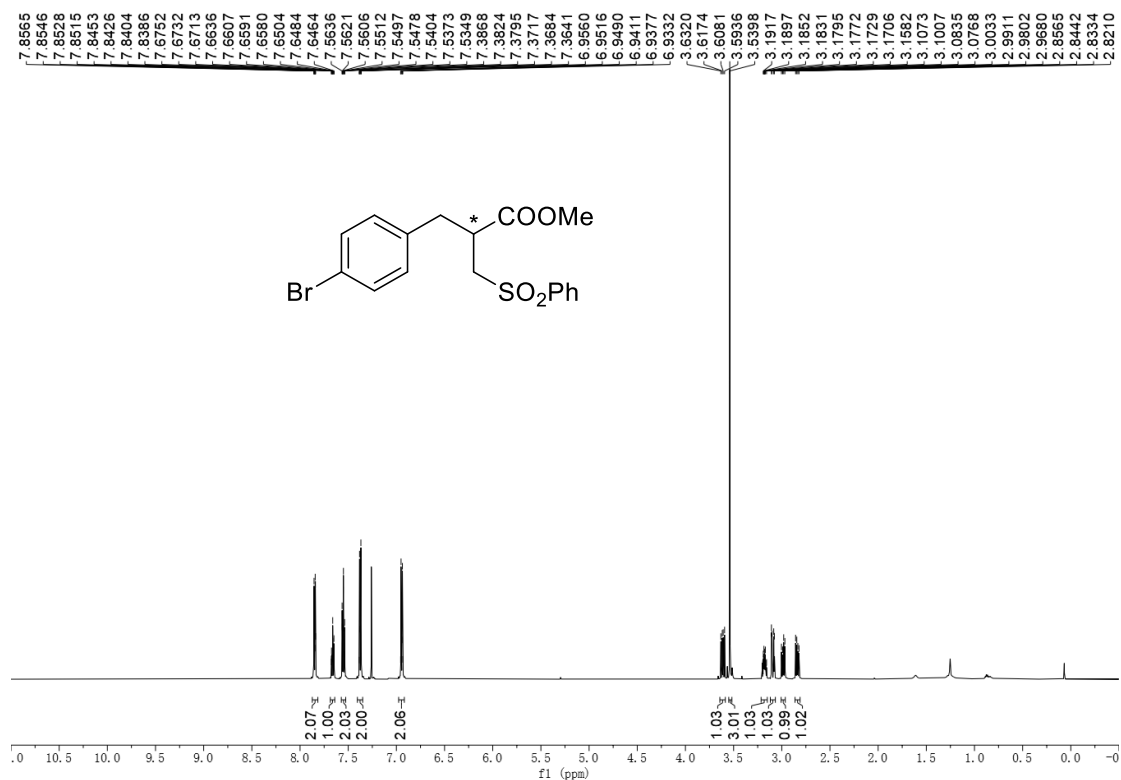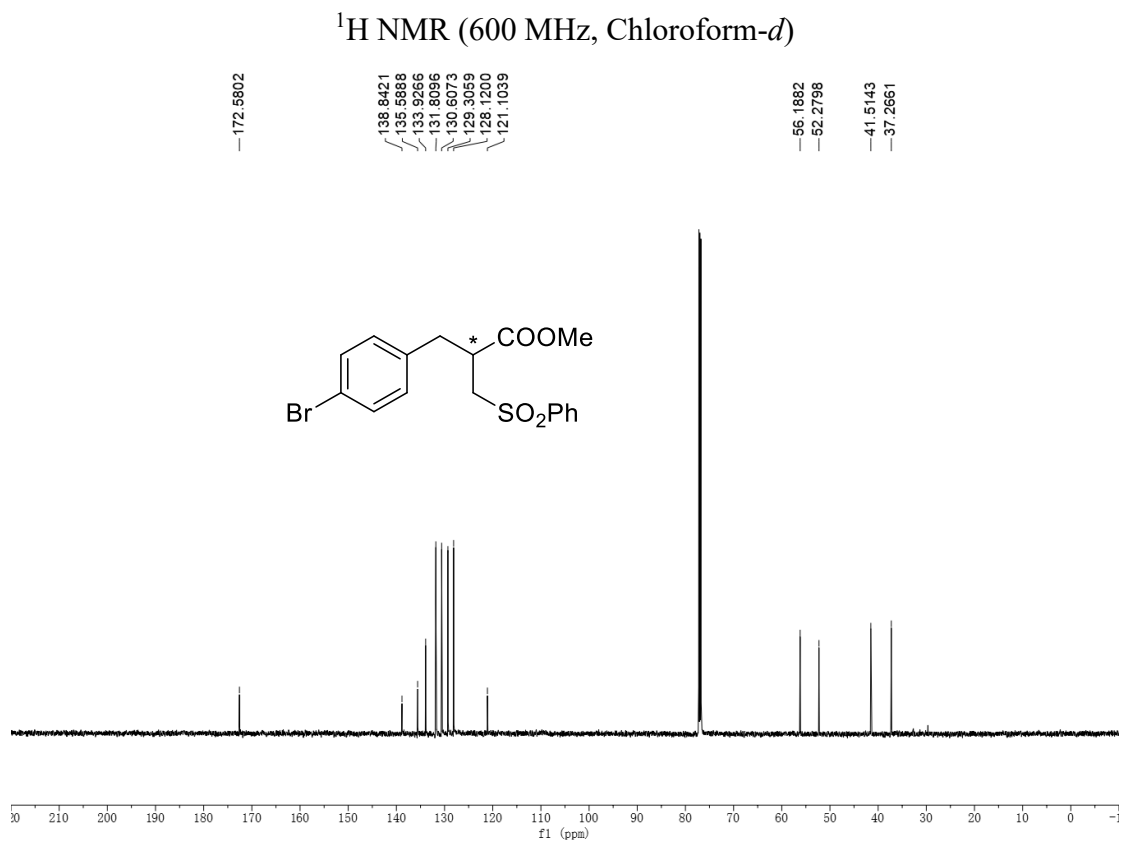



Methyl 2-(4-nitrobenzyl)-3-(phenylsulfonyl)propanoate (**2j**)

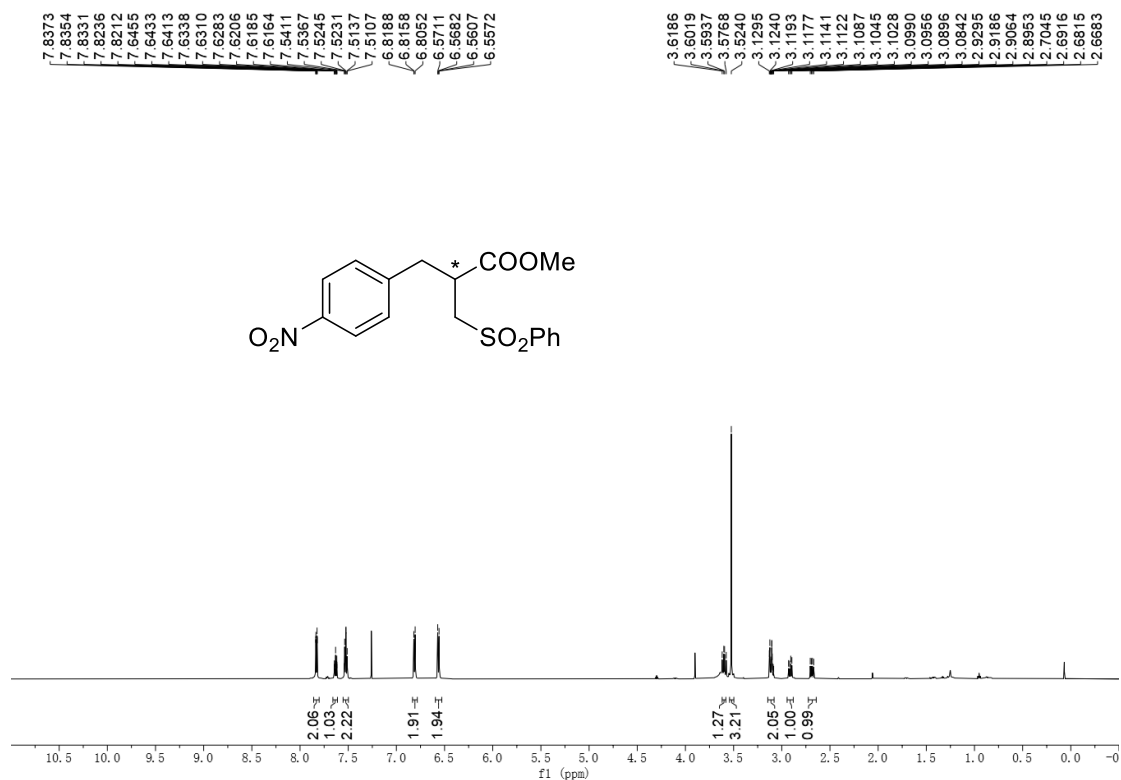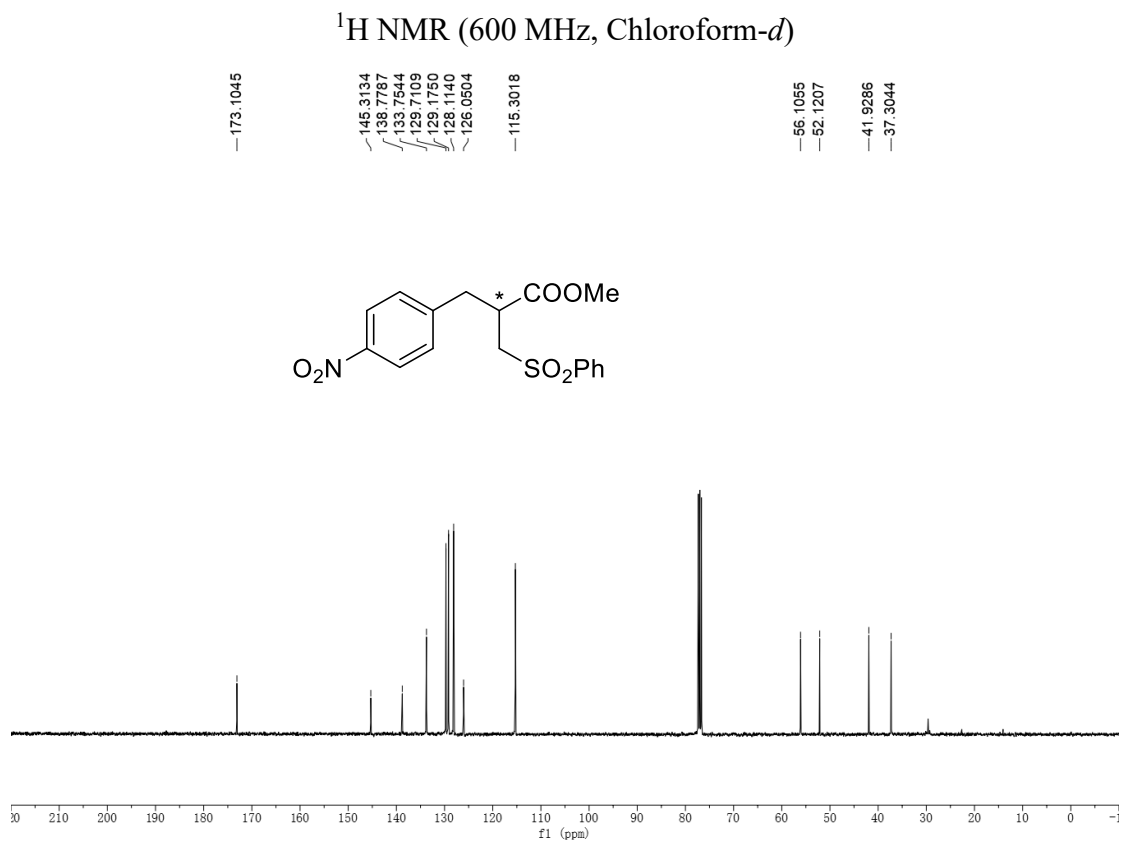

Methyl 2-(3-methylbenzyl)-3-(phenylsulfonyl)propanoate (**2k**)

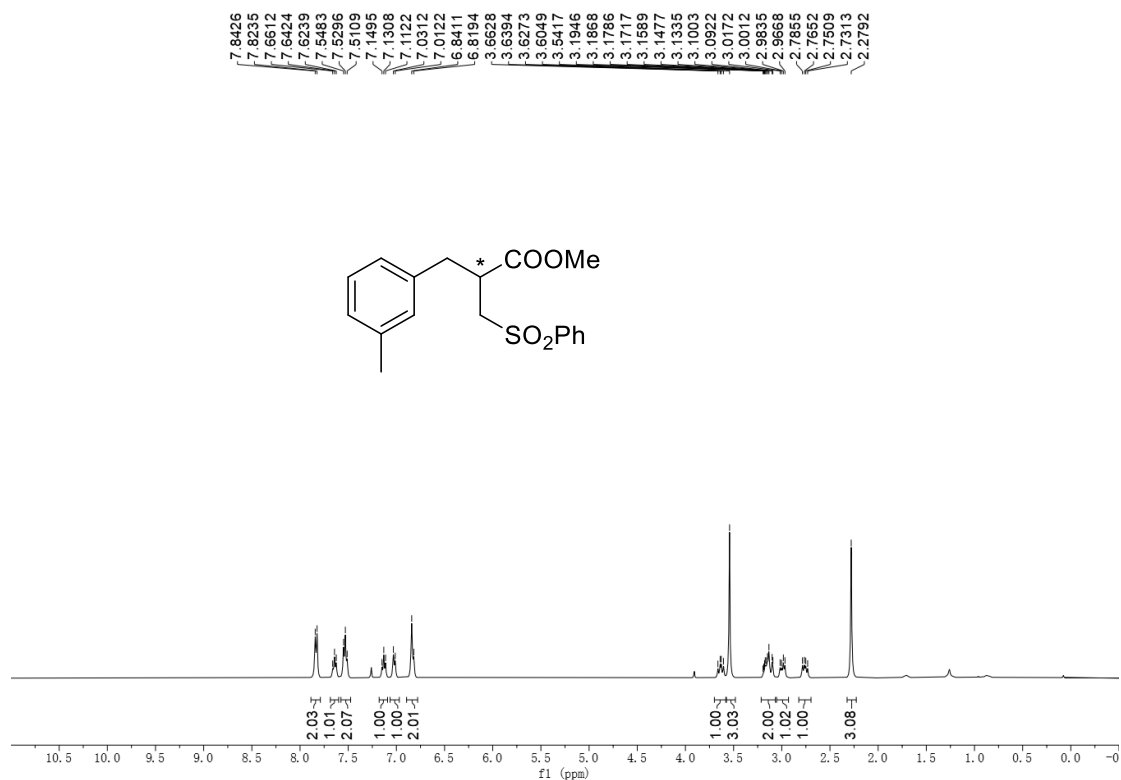

<sup>1</sup>H NMR (400 MHz, Chloroform-*d*)

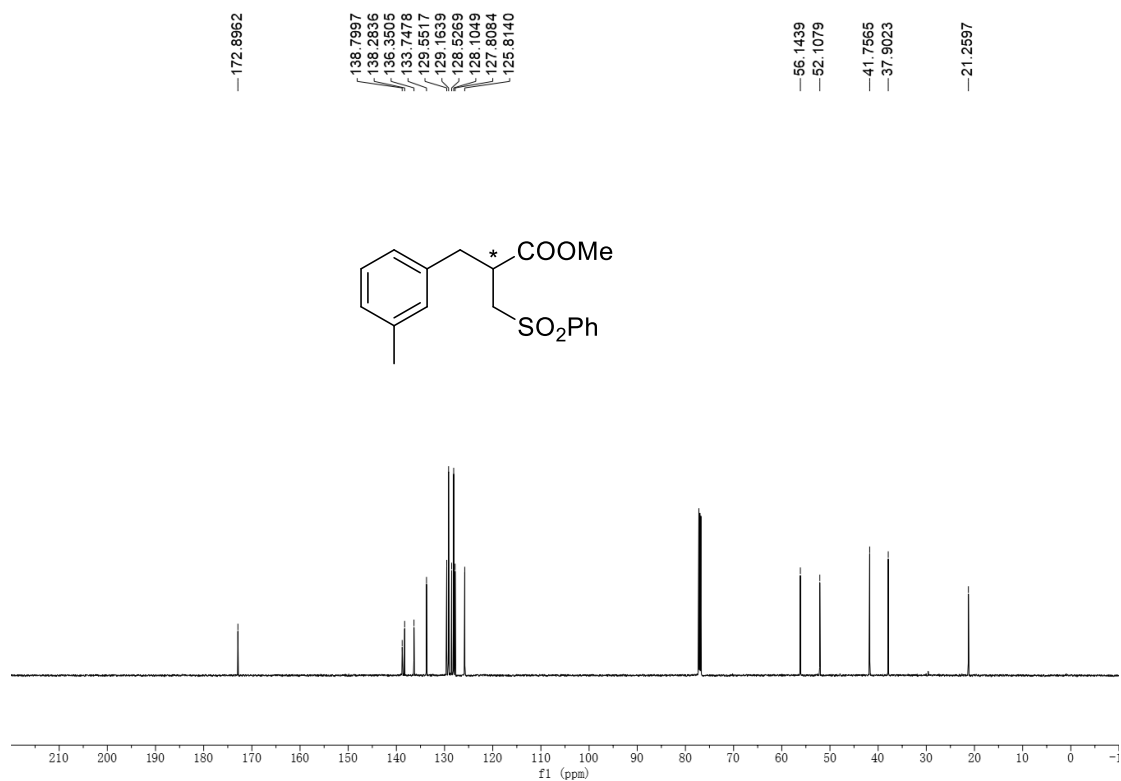

<sup>13</sup>C NMR (151 MHz, Chloroform-*d*)

Methyl 2-(3-methoxybenzyl)-3-(phenylsulfonyl)propanoate (**2l**)

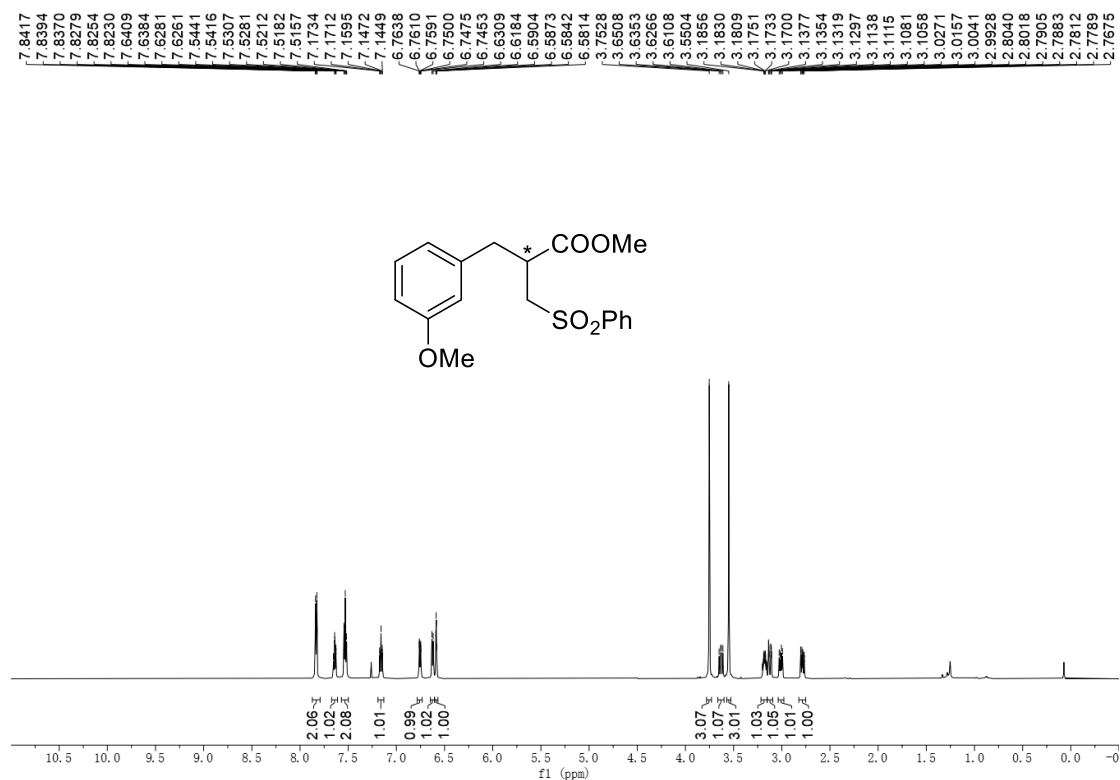

<sup>1</sup>H NMR (600 MHz, Chloroform-*d*)

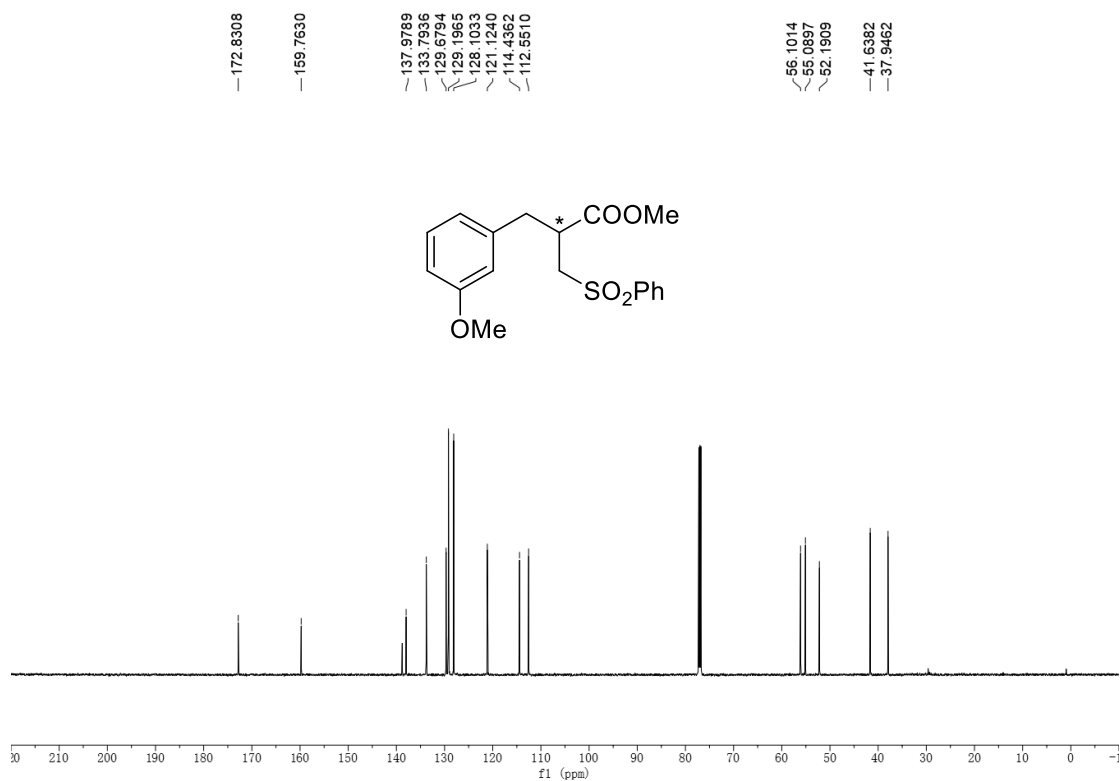

<sup>13</sup>C NMR (151 MHz, Chloroform-*d*)

Methyl 2-(3-fluorobenzyl)-3-(phenylsulfonyl)propanoate (**2m**)

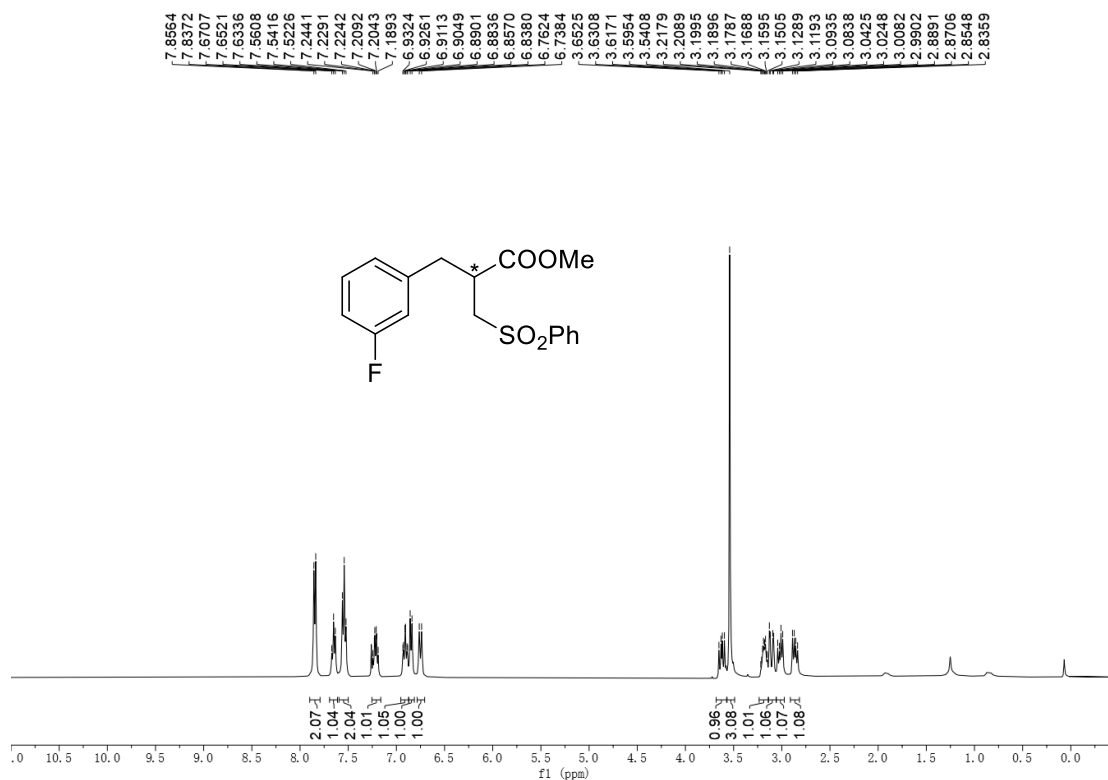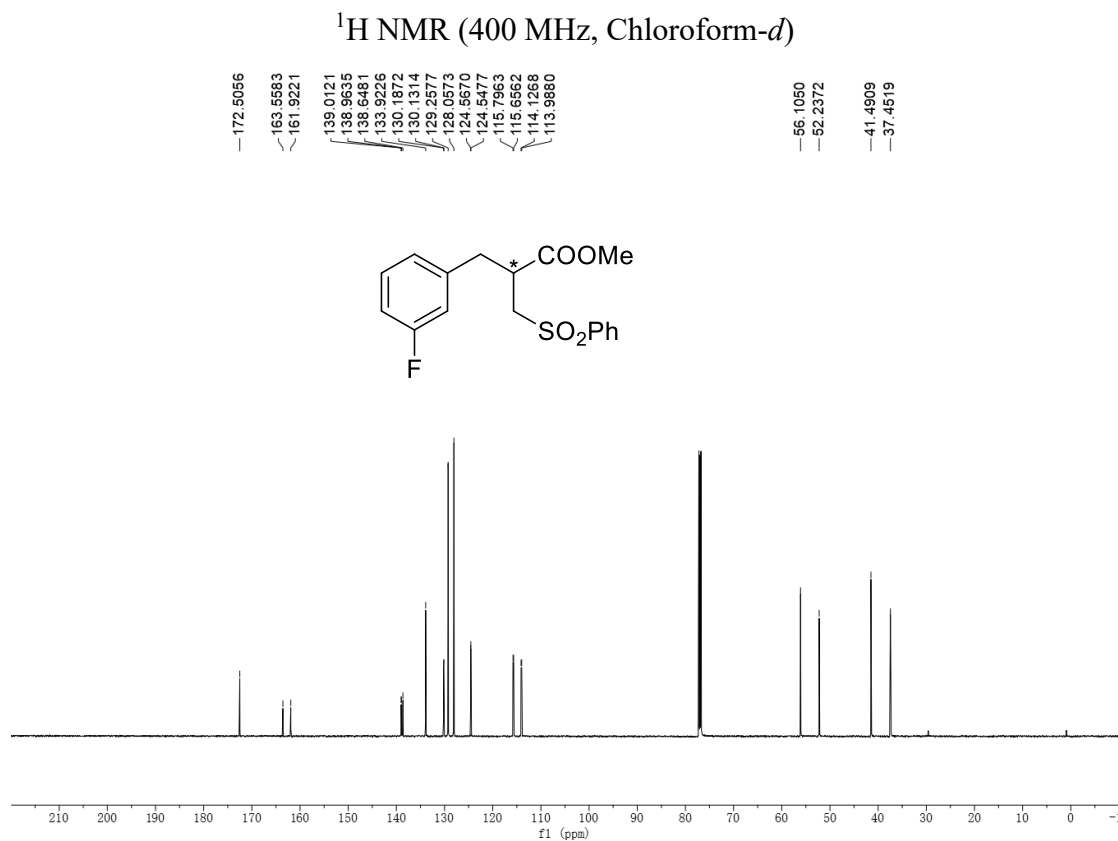

Methyl 2-(3-bromobenzyl)-3-(phenylsulfonyl)propanoate (**2n**)

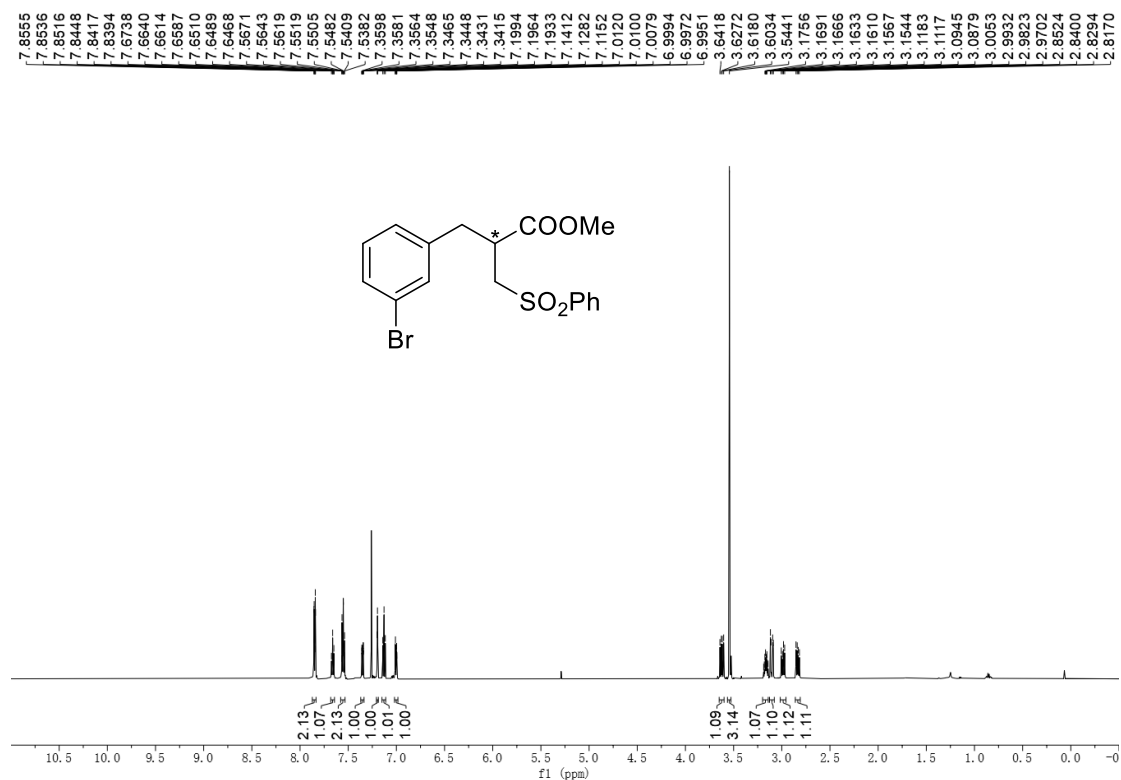

<sup>1</sup>H NMR (600 MHz, Chloroform-*d*)

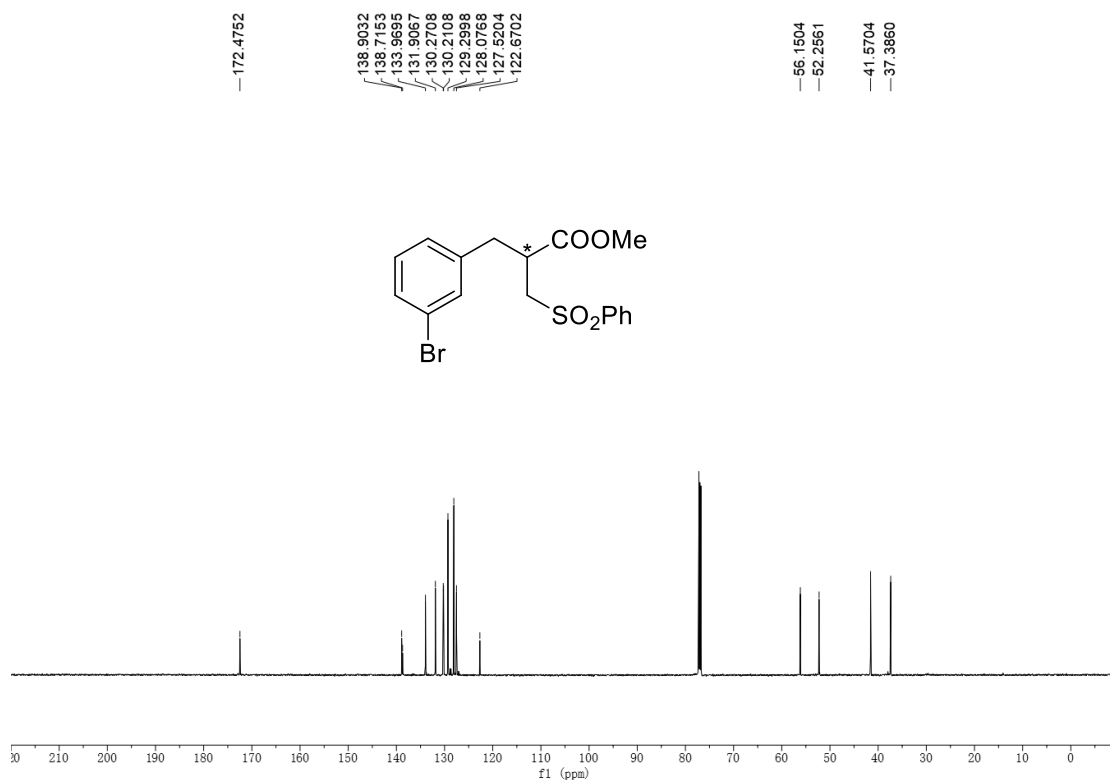

<sup>13</sup>C NMR (151 MHz, Chloroform-*d*)

Methyl 2-(2-fluorobenzyl)-3-(phenylsulfonyl)propanoate (**2o**)

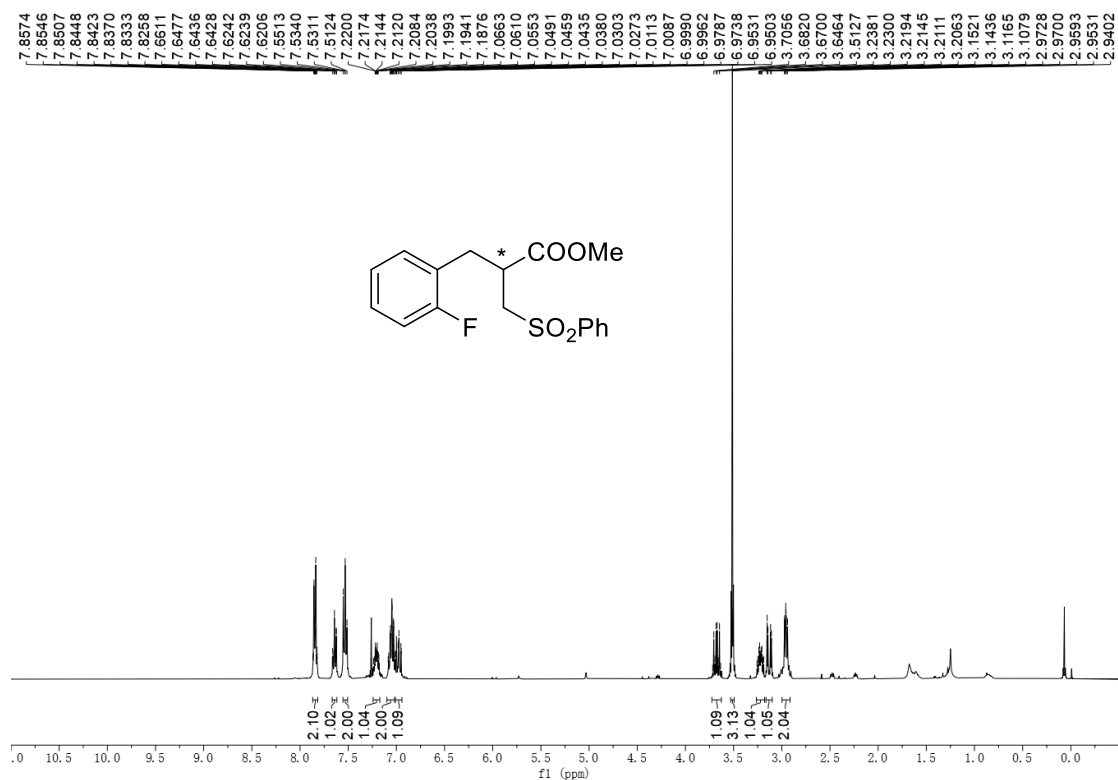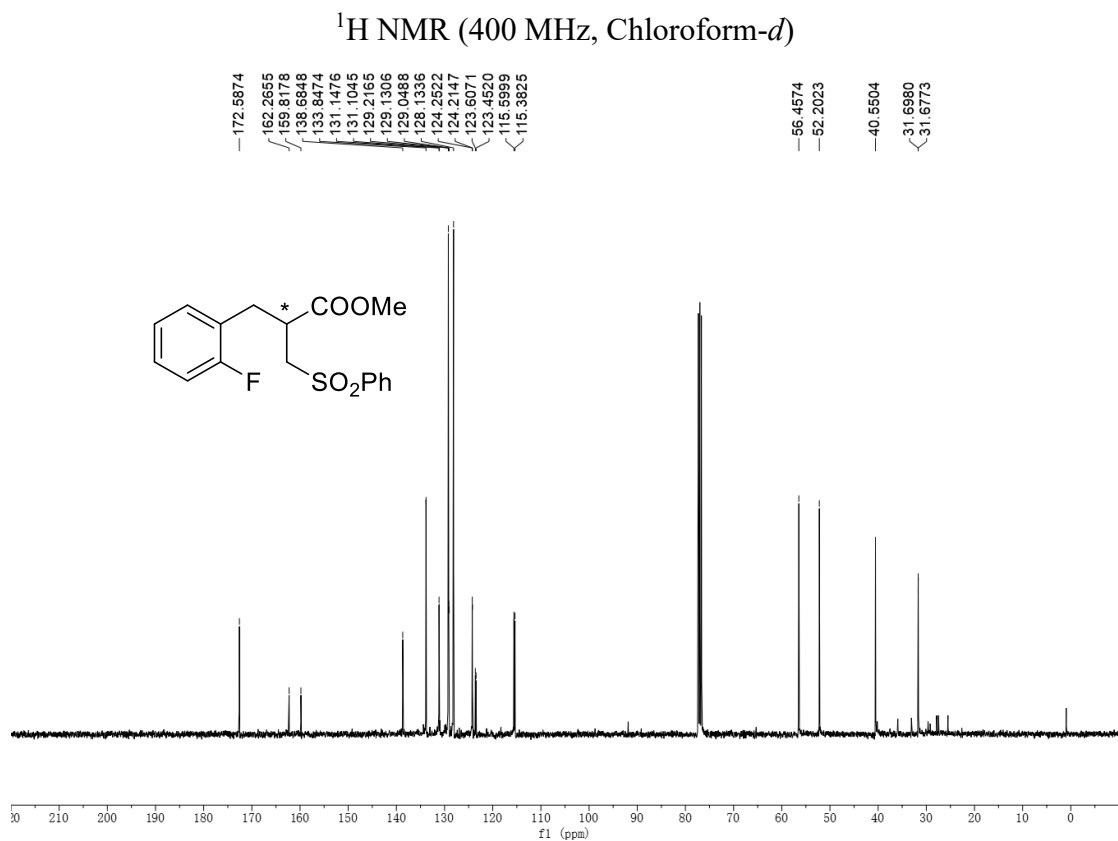

Methyl 2-(2-bromobenzyl)-3-(phenylsulfonyl)propanoate (**2p**)

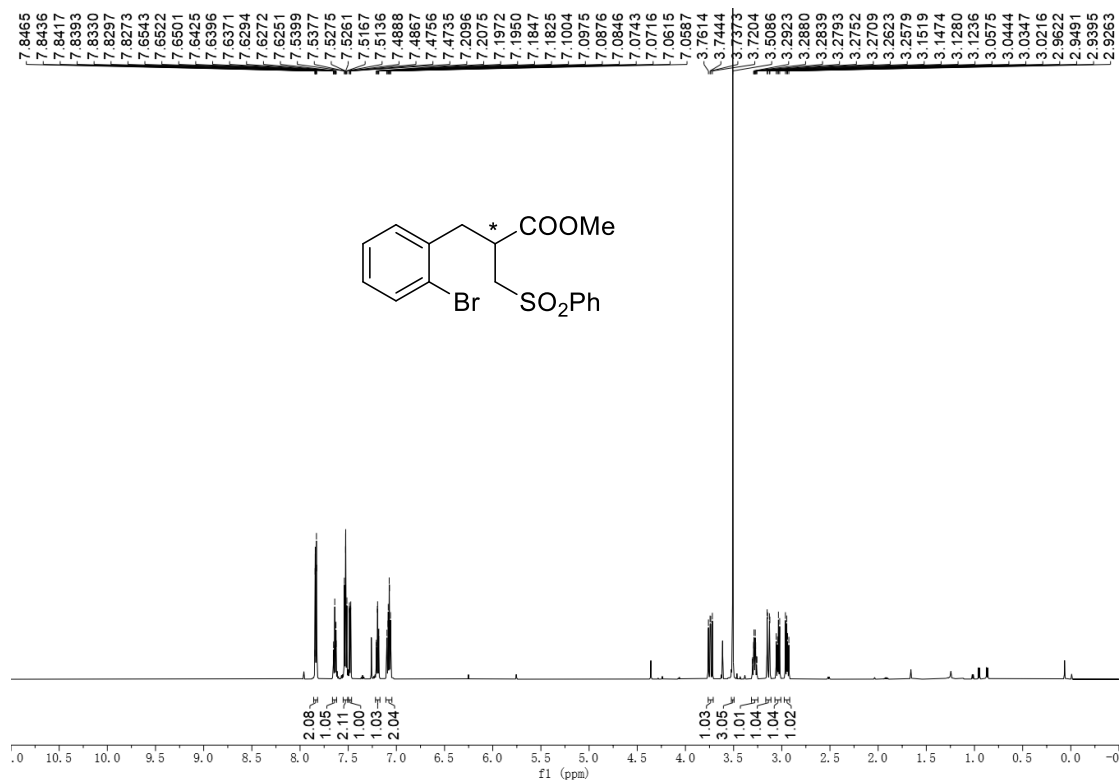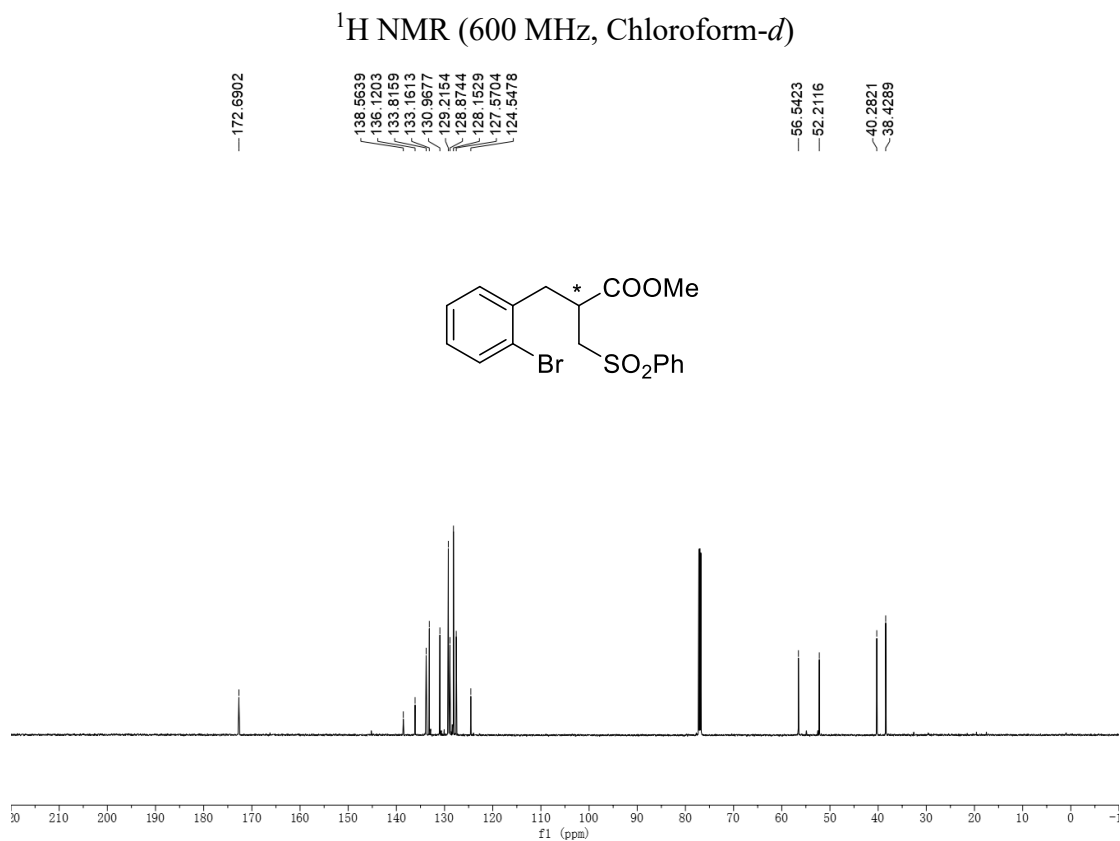

Methyl 2-(3,4-dichlorobenzyl)-3-(phenylsulfonyl)propanoate (**2q**)

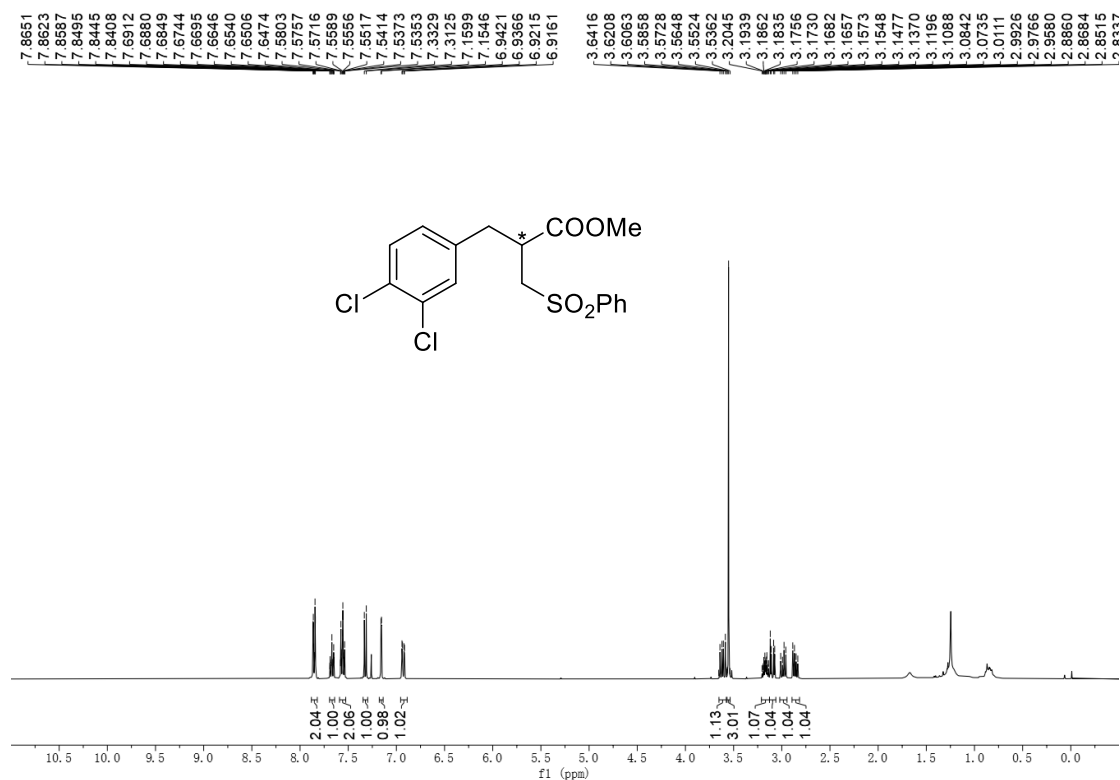

<sup>1</sup>H NMR (400 MHz, Chloroform-*d*)

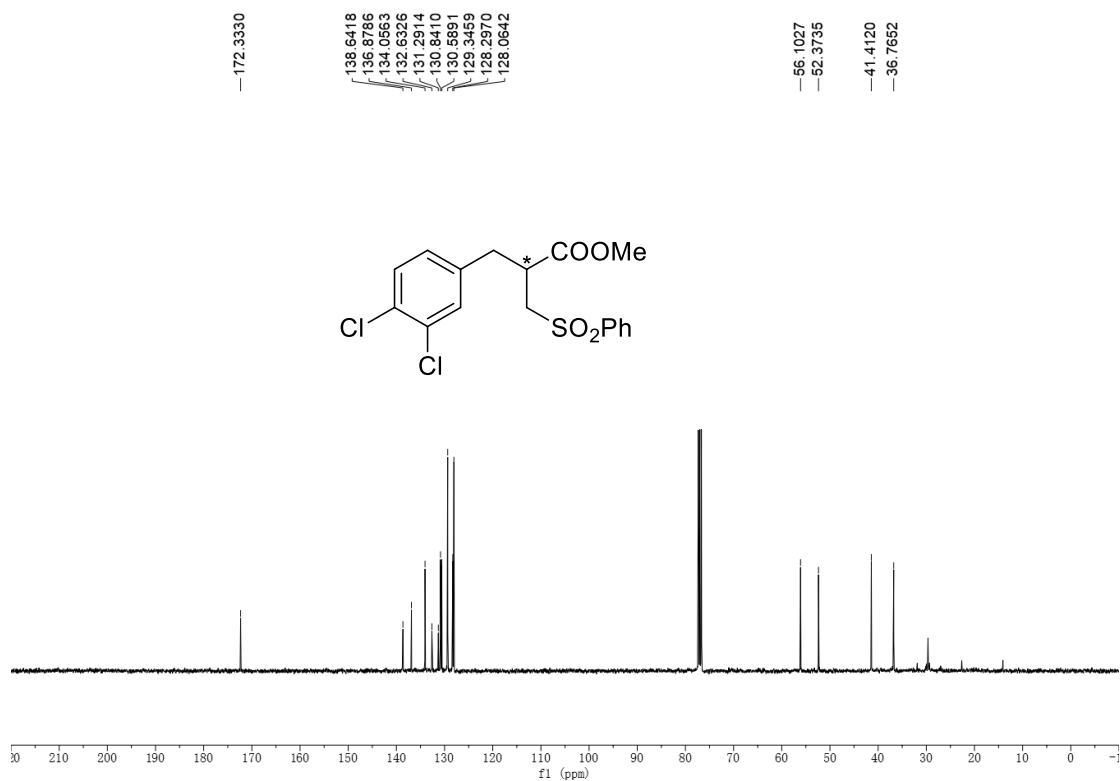

<sup>13</sup>C NMR (101 MHz, Chloroform-*d*)



Methyl 3-(naphthalen-2-yl)-2-((phenylsulfonyl)methyl)propanoate (**2r**)

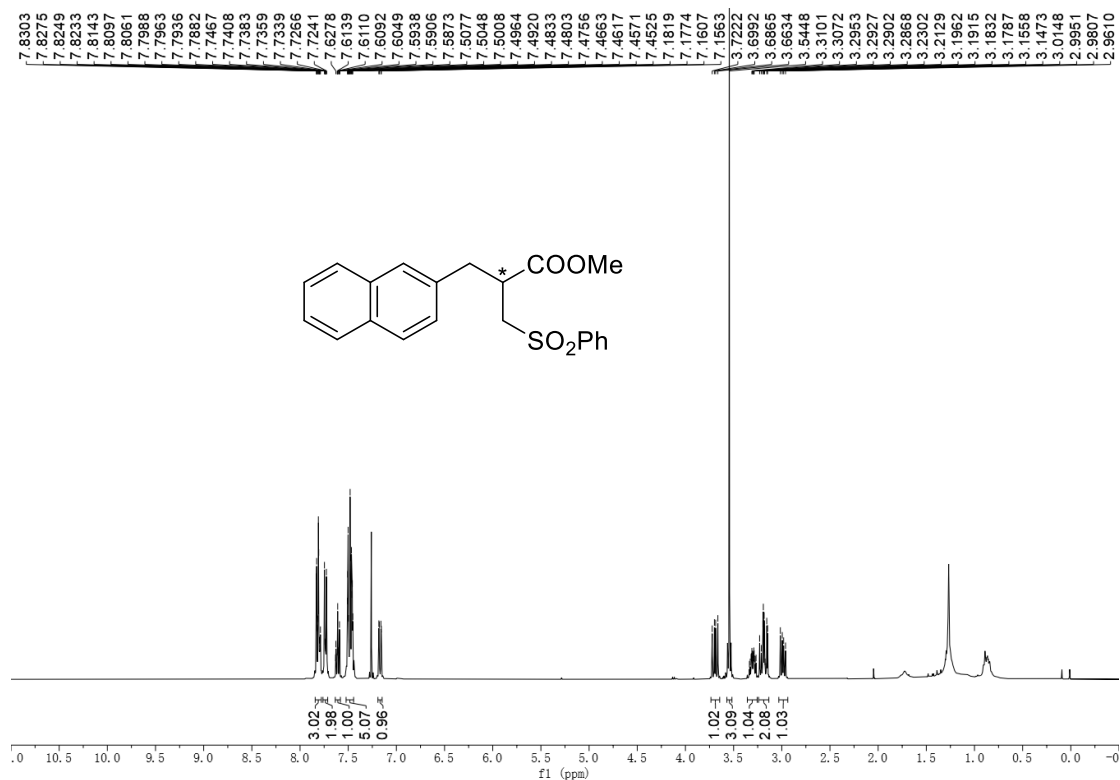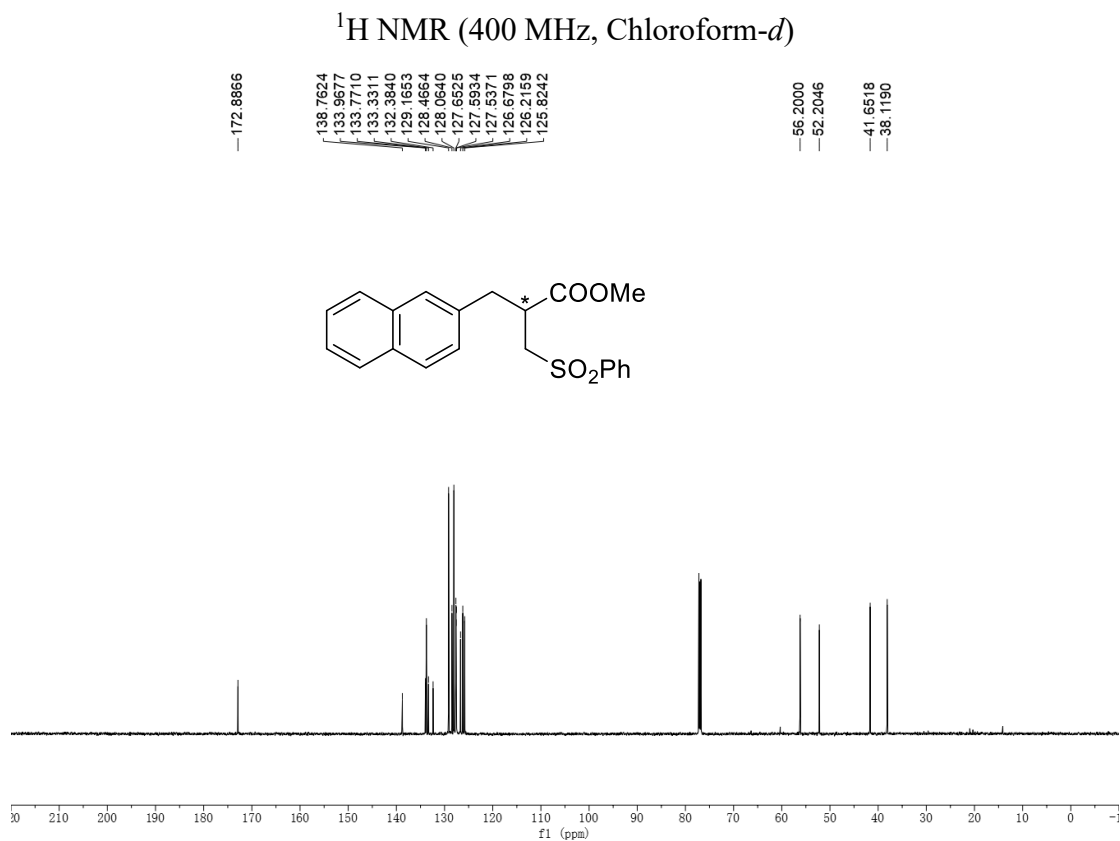

Methyl 3-(phenylsulfonyl)-2-(thiophen-2-ylmethyl)propanoate (**2s**)

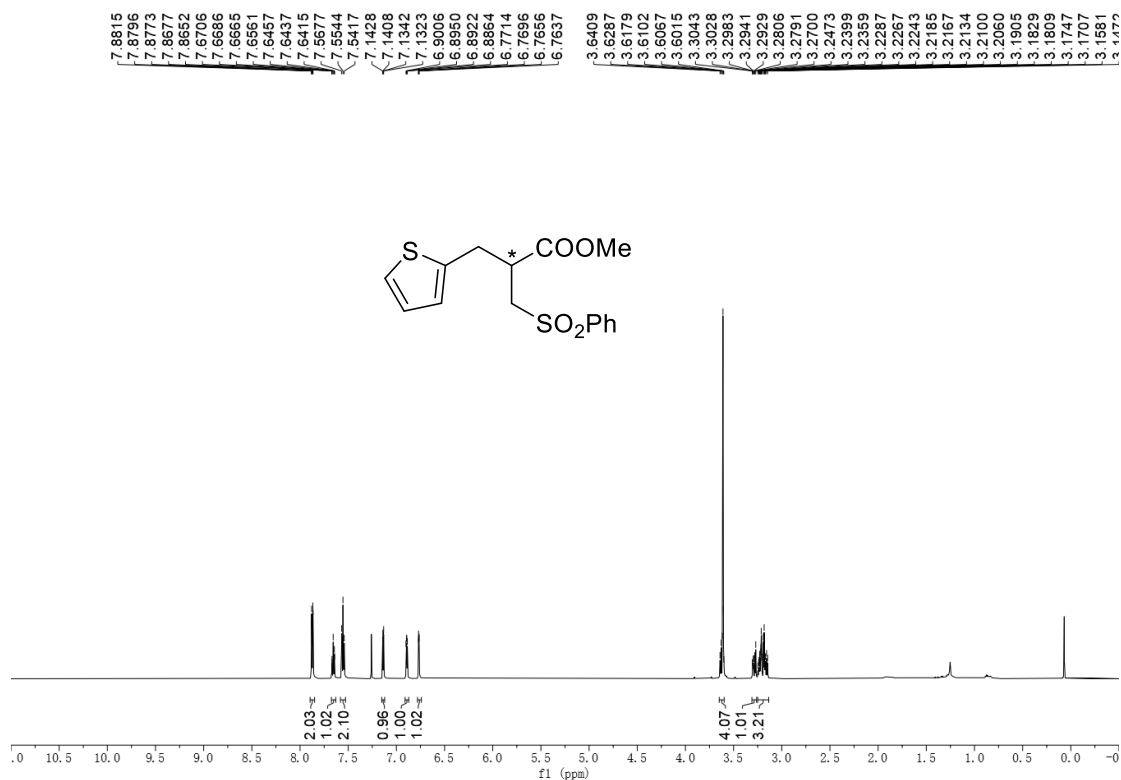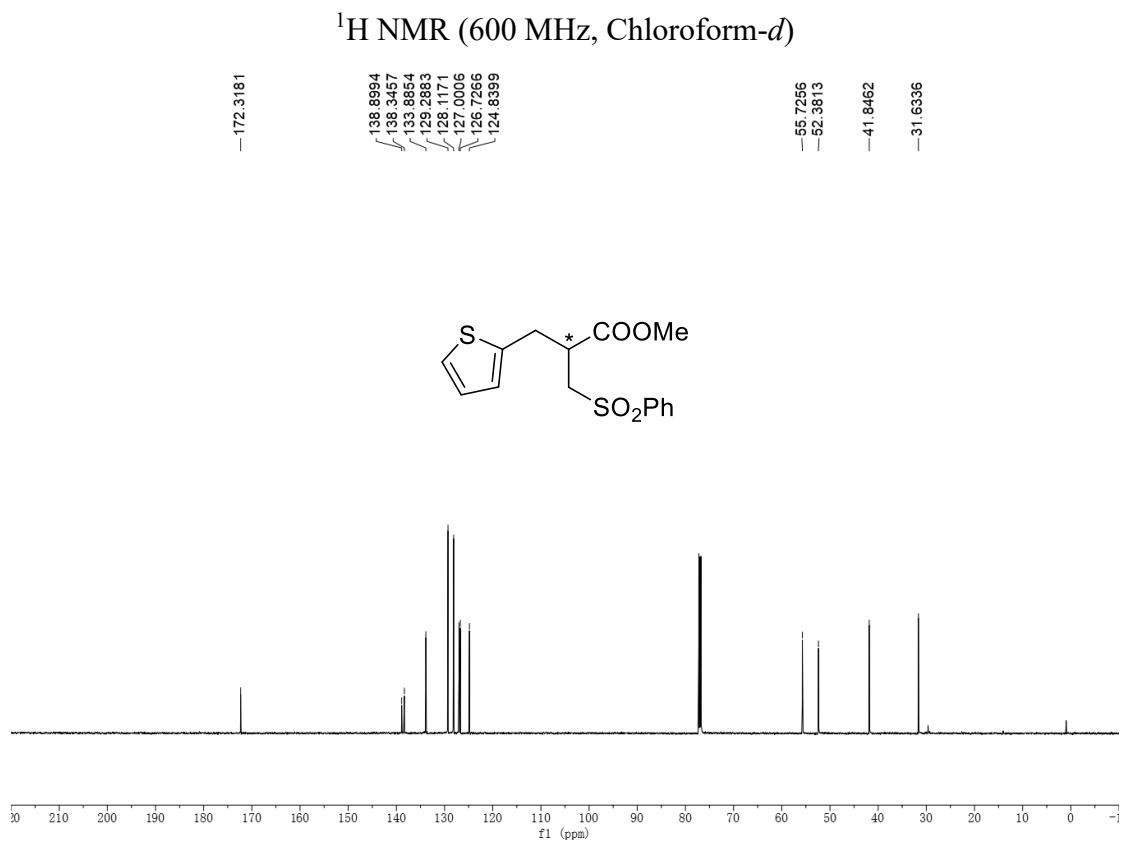

Methyl 3-(furan-2-yl)-2-((phenylsulfonyl)methyl)propanoate (**2t**)

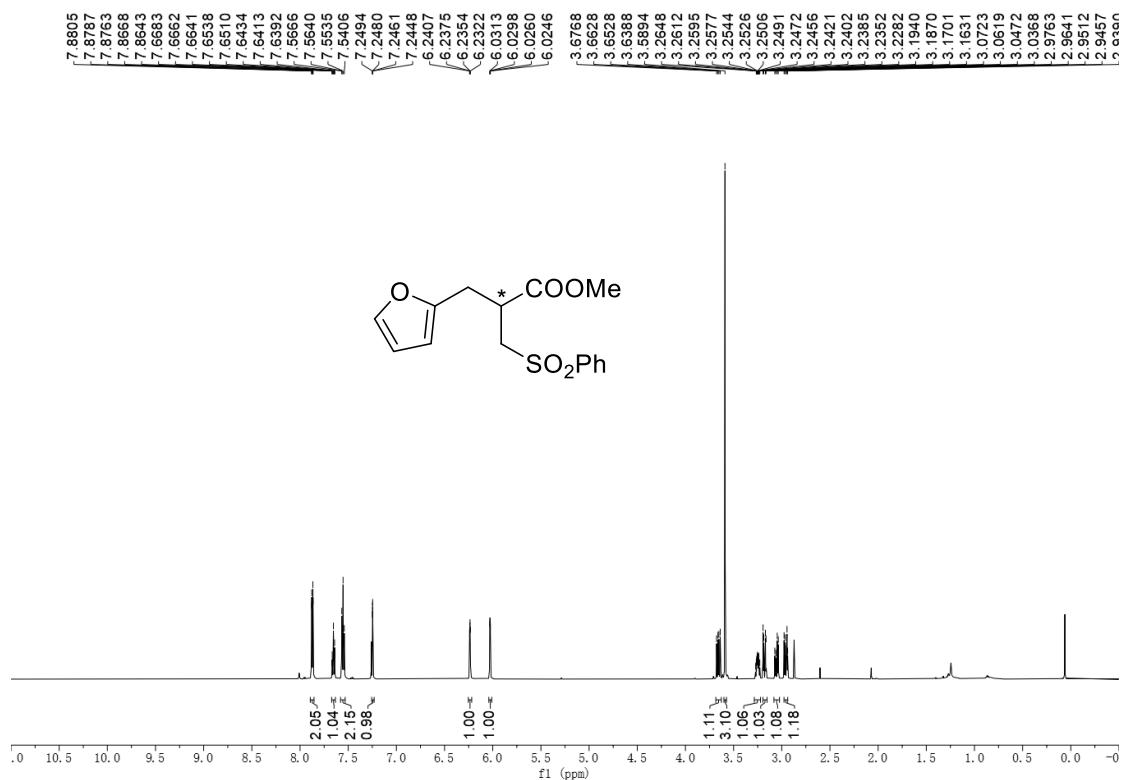

<sup>1</sup>H NMR (600 MHz, Chloroform-*d*)

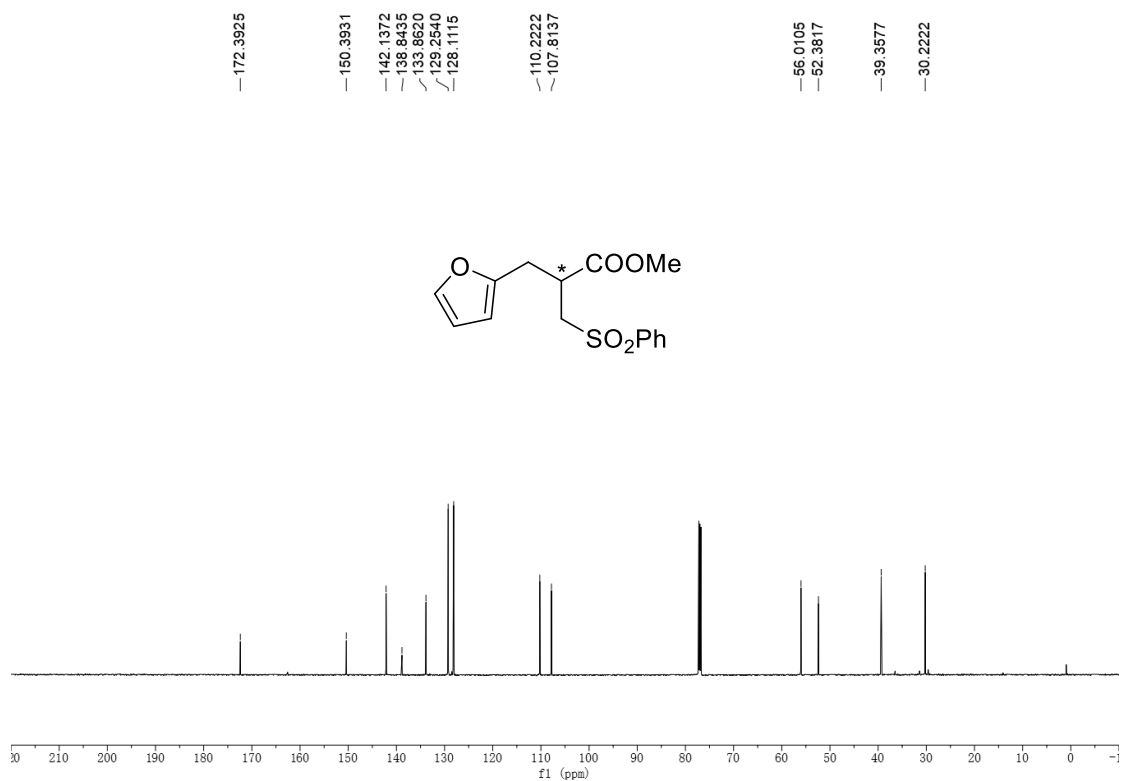

<sup>13</sup>C NMR (151 MHz, Chloroform-*d*)

Methyl 3-(phenylsulfonyl)-2-(pyridin-3-ylmethyl)propanoate (**2u**)

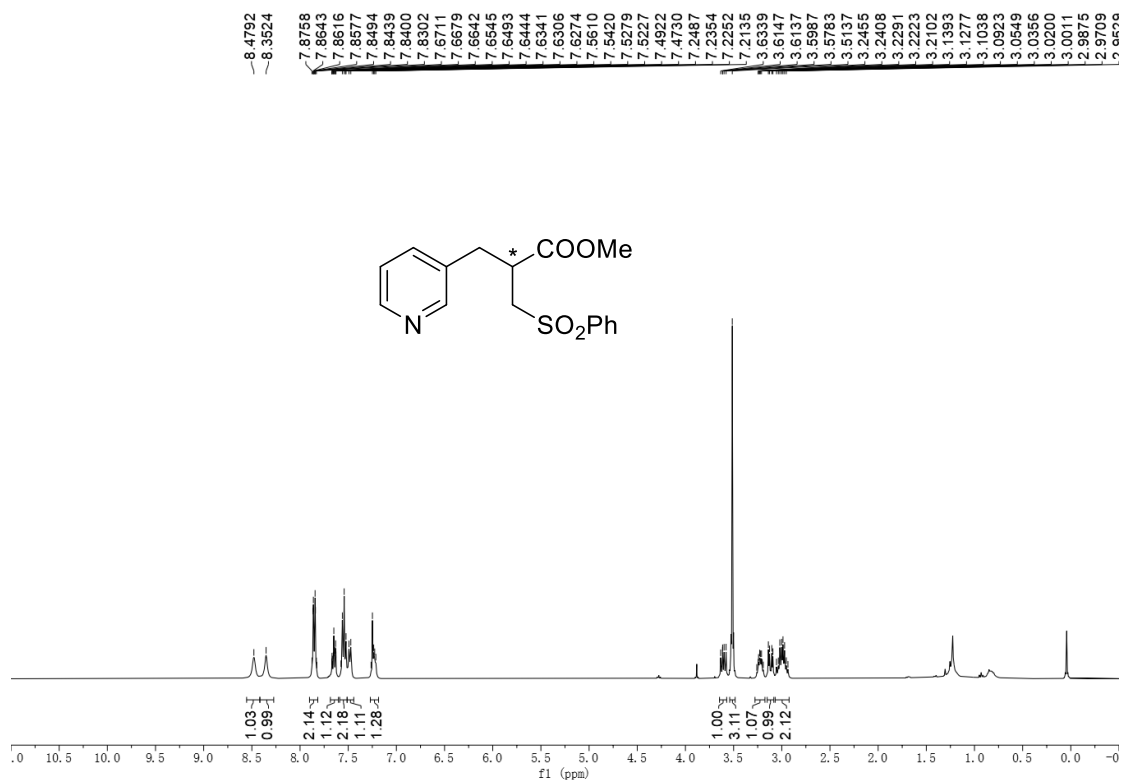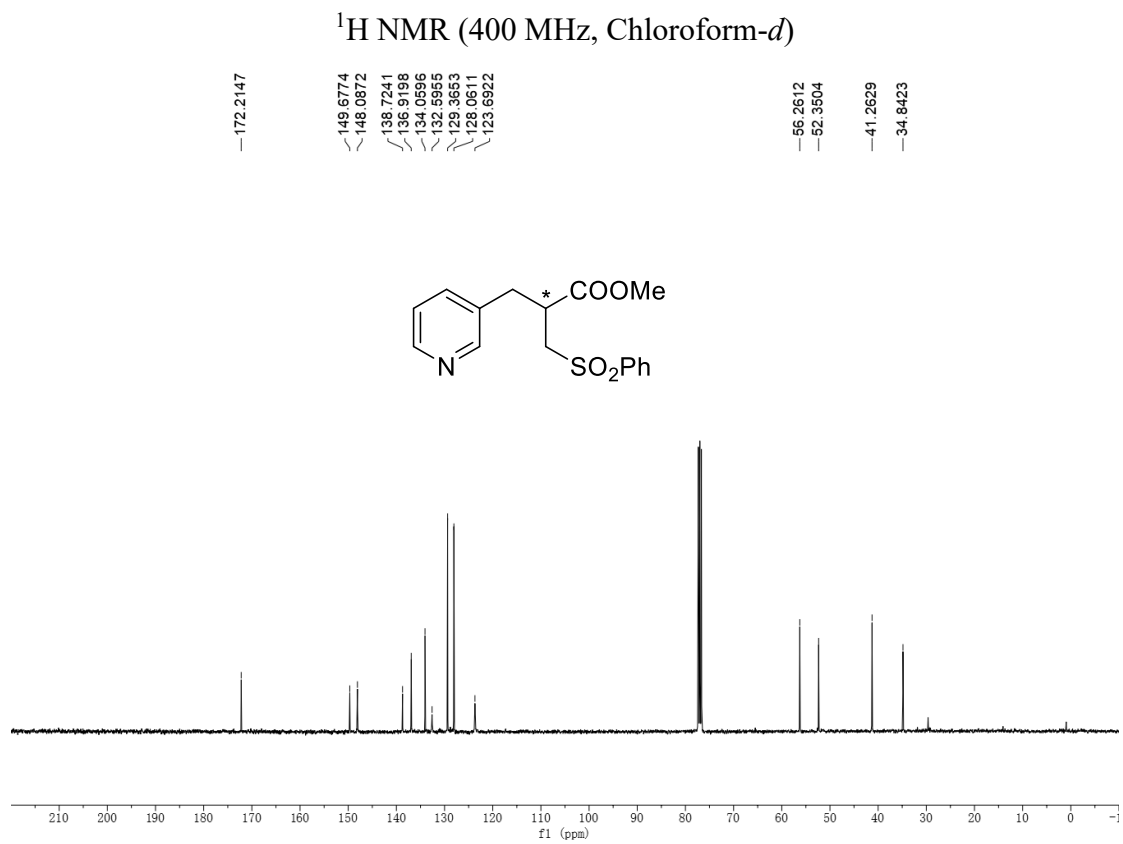

Methyl 4-methyl-2-((phenylsulfonyl)methyl)pentanoate (**2v**)

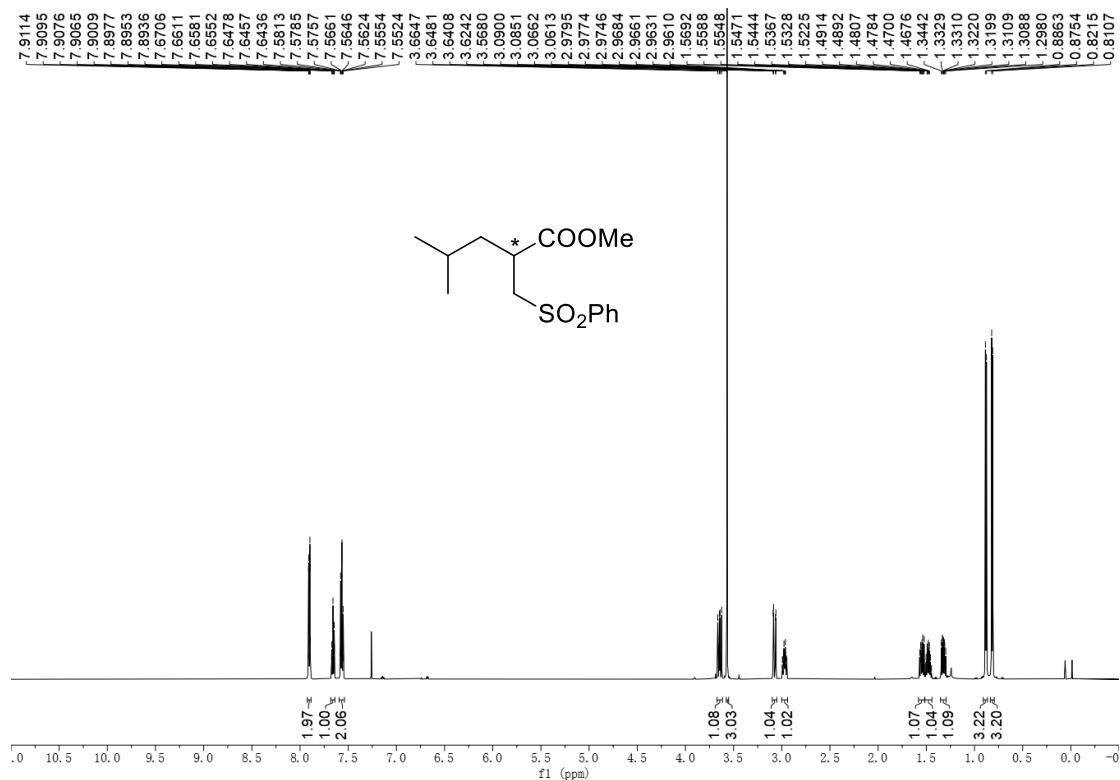

<sup>1</sup>H NMR (600 MHz, Chloroform-*d*)

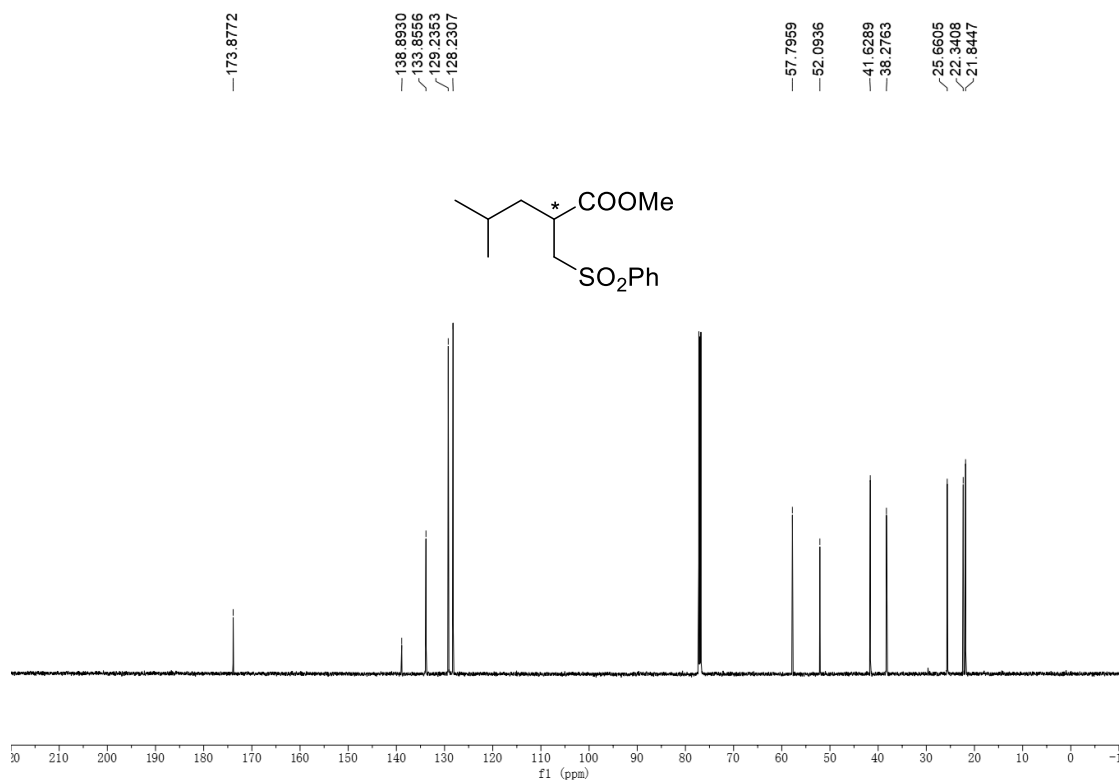

<sup>13</sup>C NMR (151 MHz, Chloroform-*d*)

# Methyl 2-benzyl-3-tosylpropanoate (**4a**)

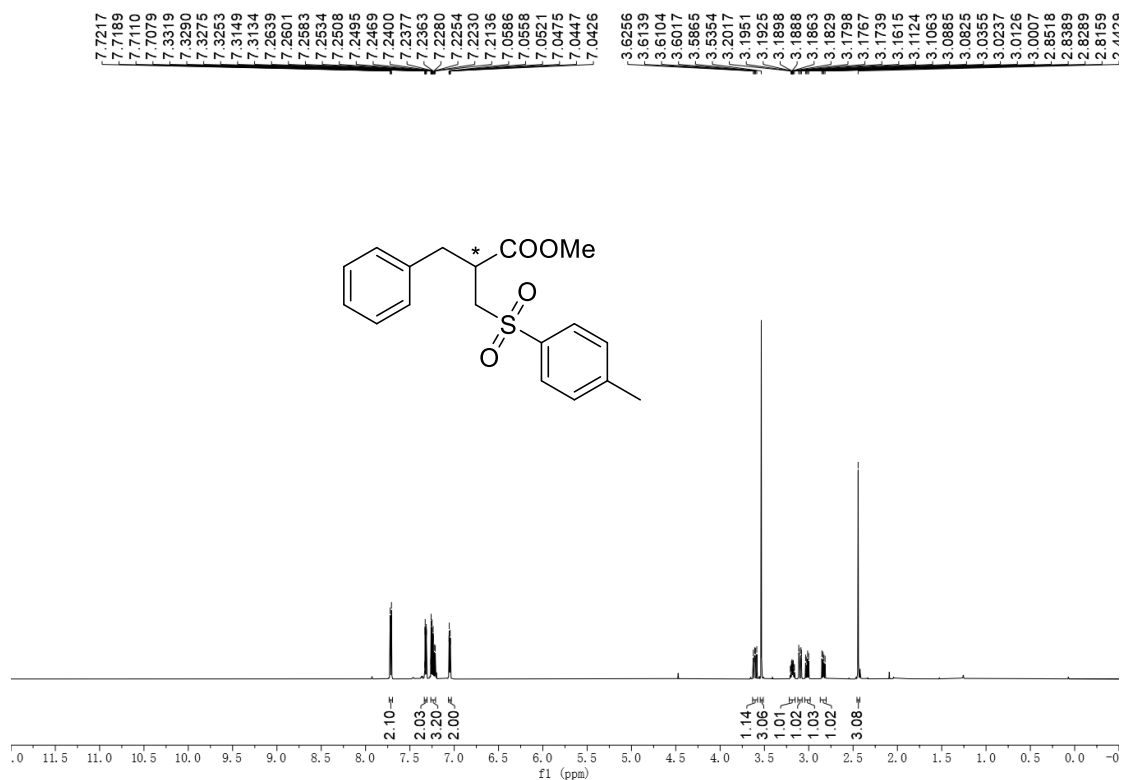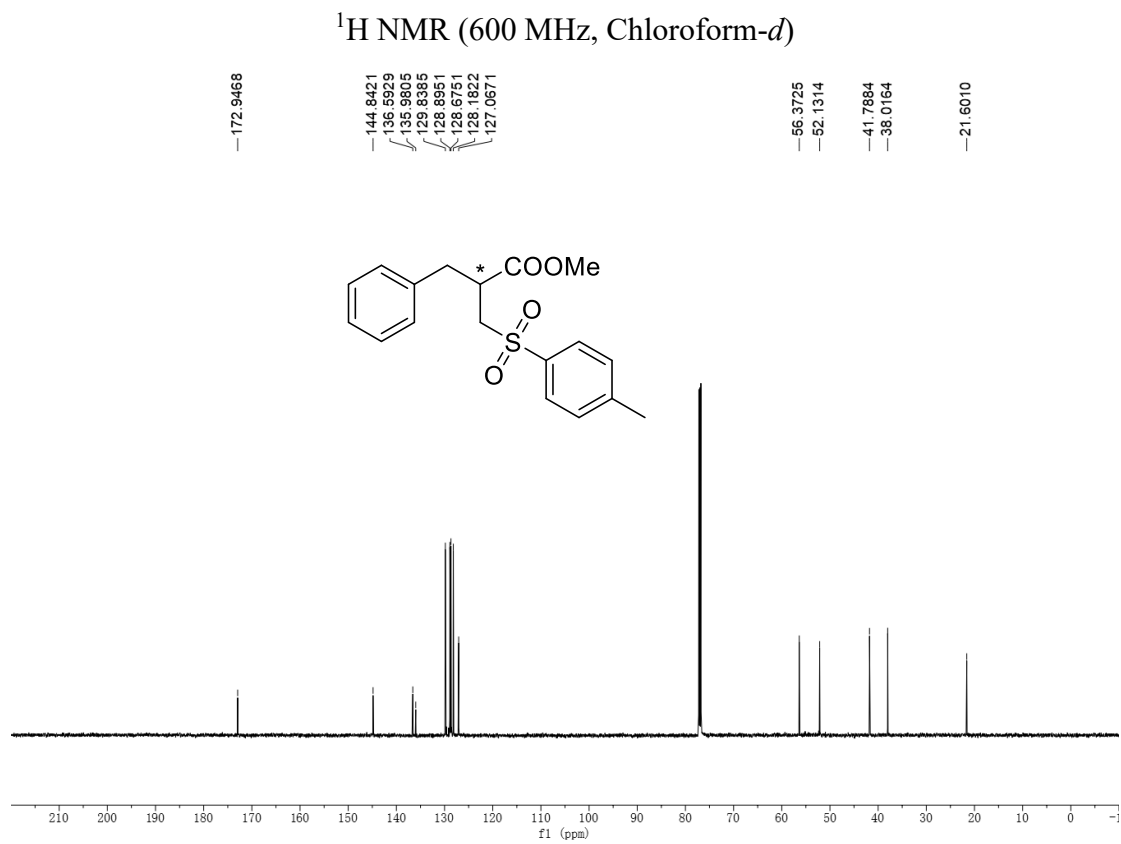

Methyl 2-benzyl-3-((4-fluorophenyl)sulfonyl)propanoate (**4b**)

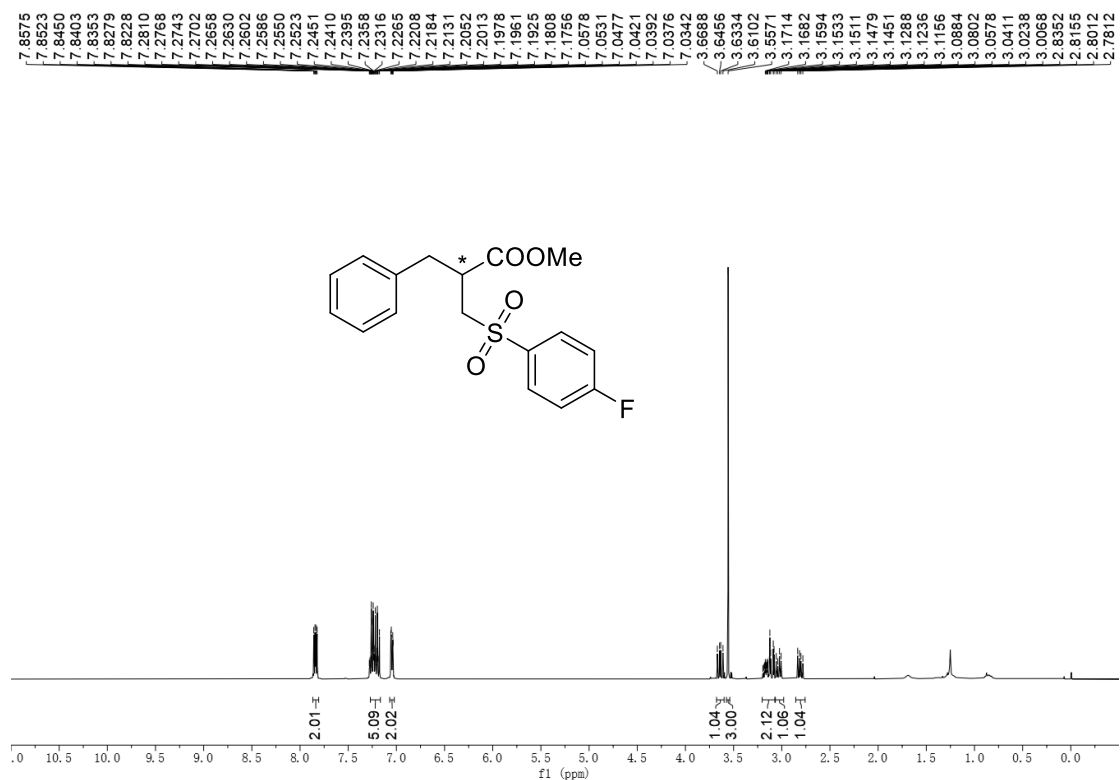

<sup>1</sup>H NMR (400 MHz, Chloroform-*d*)

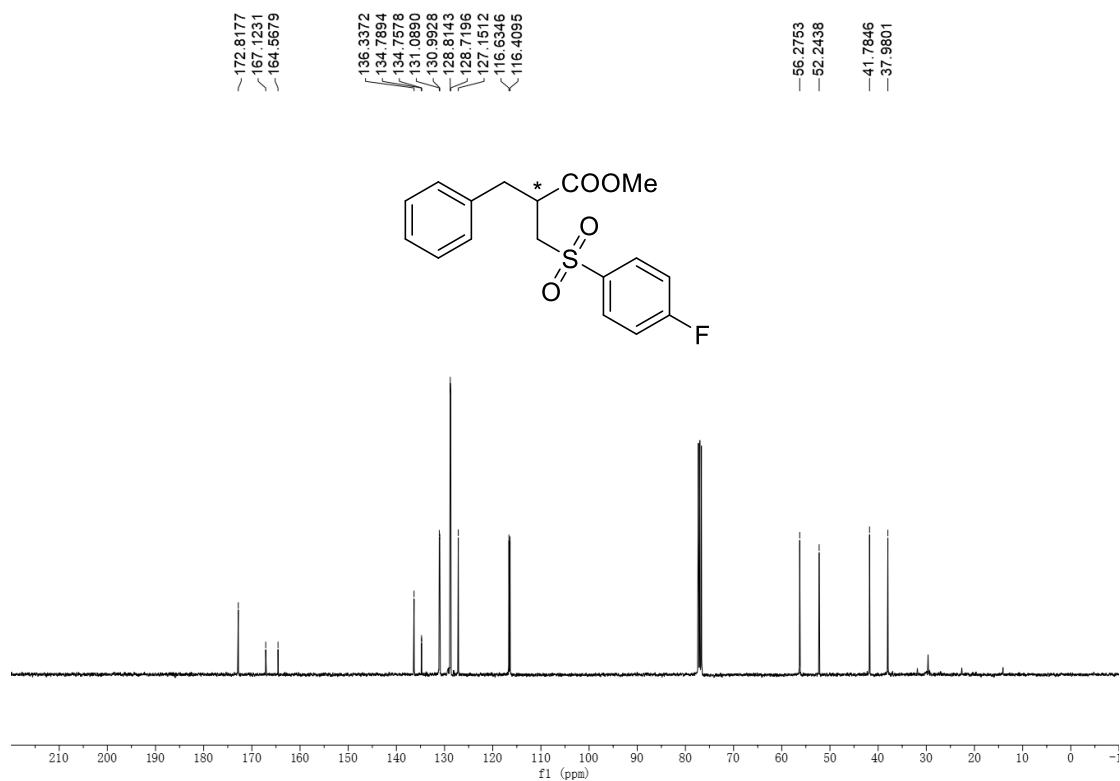

<sup>13</sup>C NMR (101 MHz, Chloroform-*d*)

Methyl 2-benzyl-3-((4-chlorophenyl)sulfonyl)propanoate (**4c**)

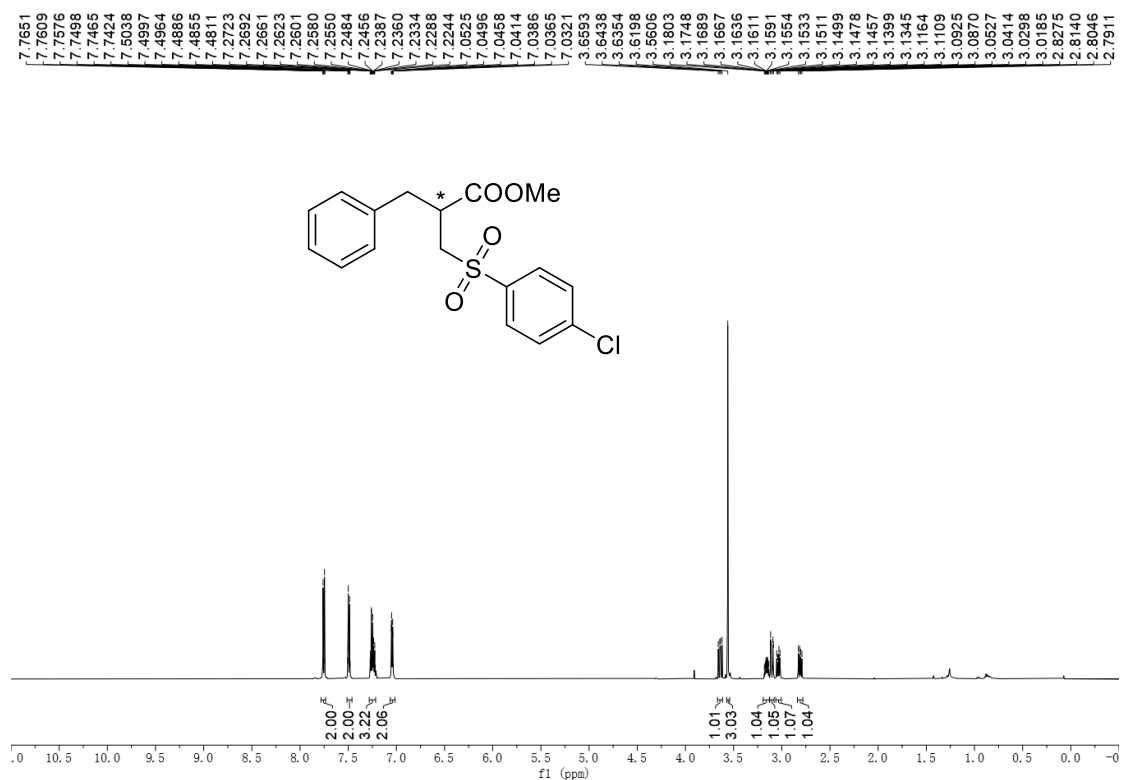

<sup>1</sup>H NMR (600 MHz, Chloroform-*d*)

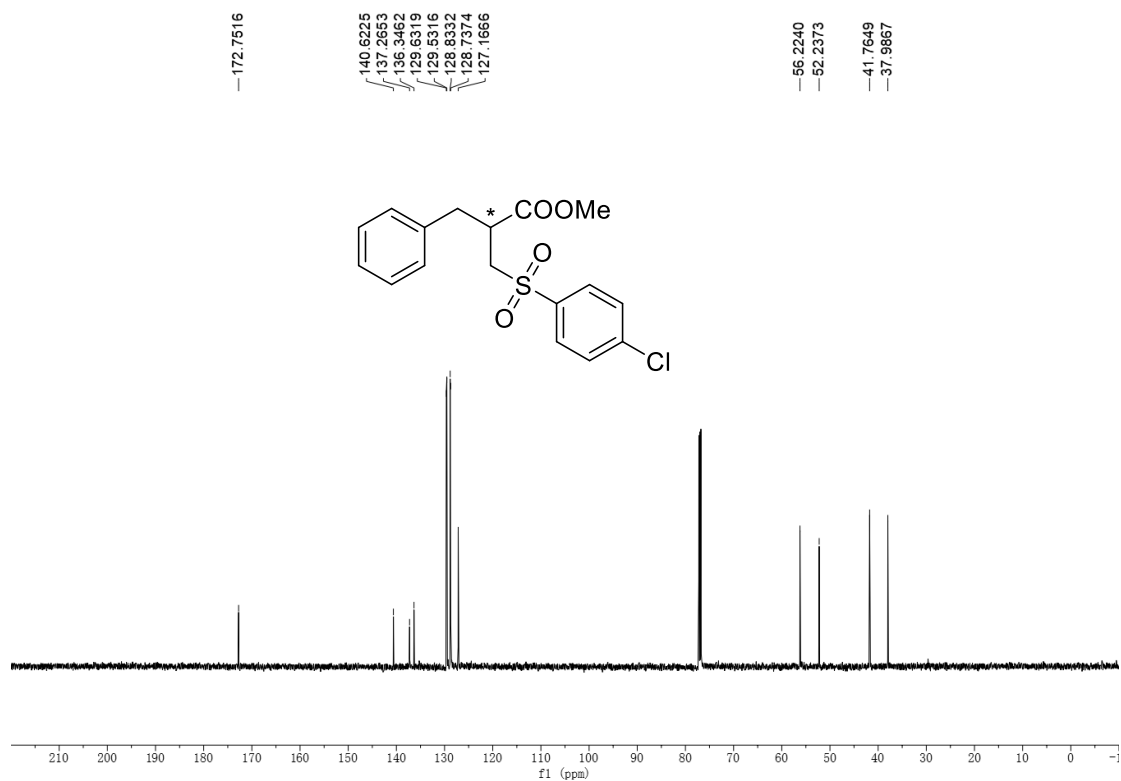

<sup>13</sup>C NMR (151 MHz, Chloroform-*d*)



Methyl 2-benzyl-3-(methylsulfonyl)propanoate (**4d**)

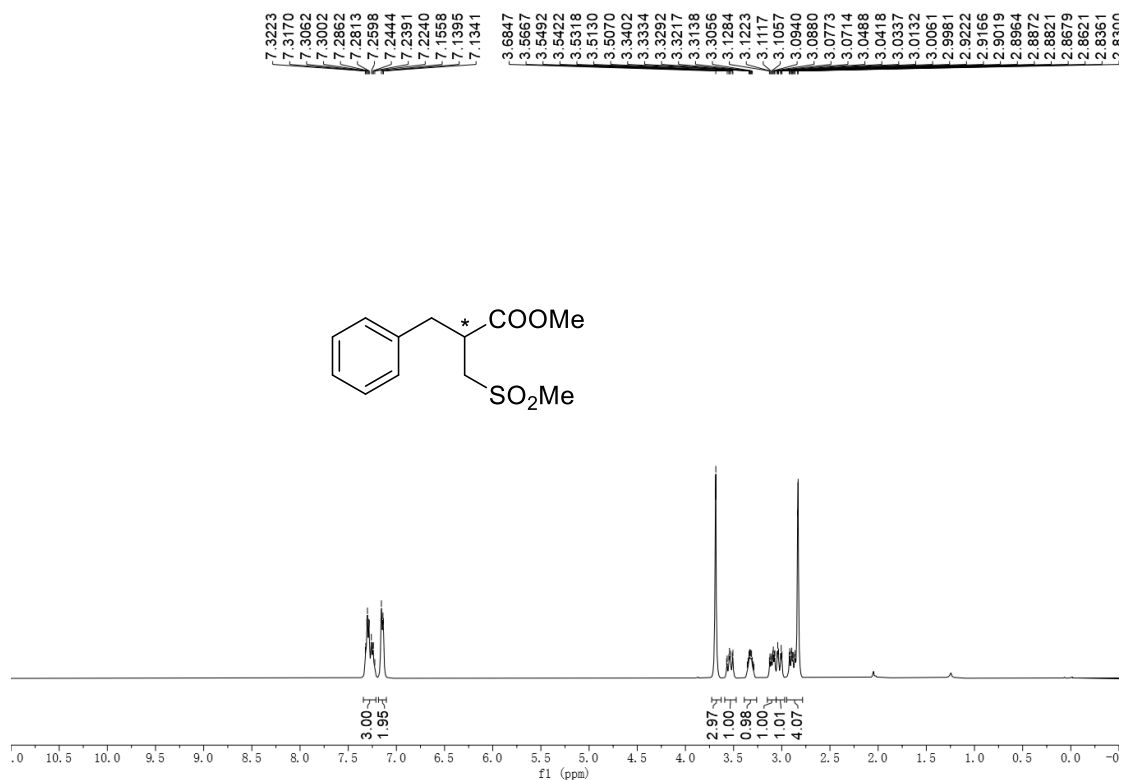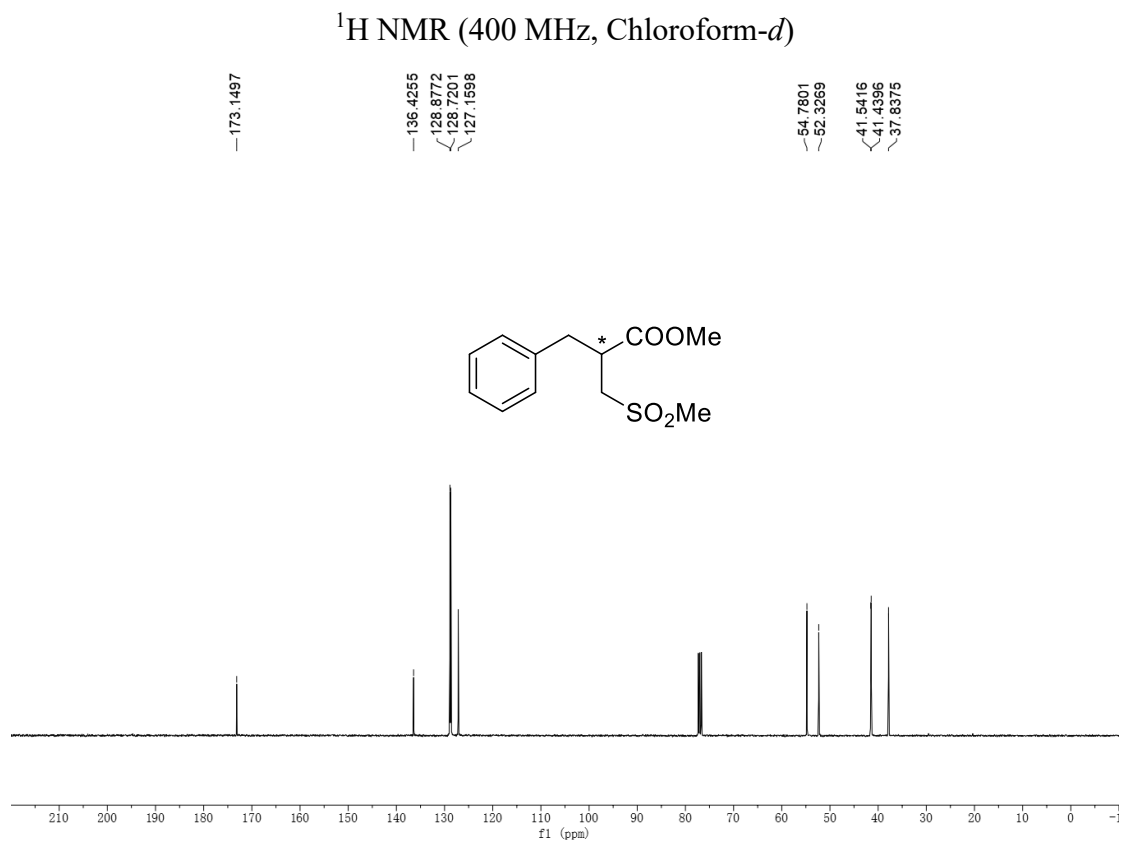

Methyl (Z)-2-((*tert*-butylsulfonyl)methyl)-3-phenylacrylate (**4e**)

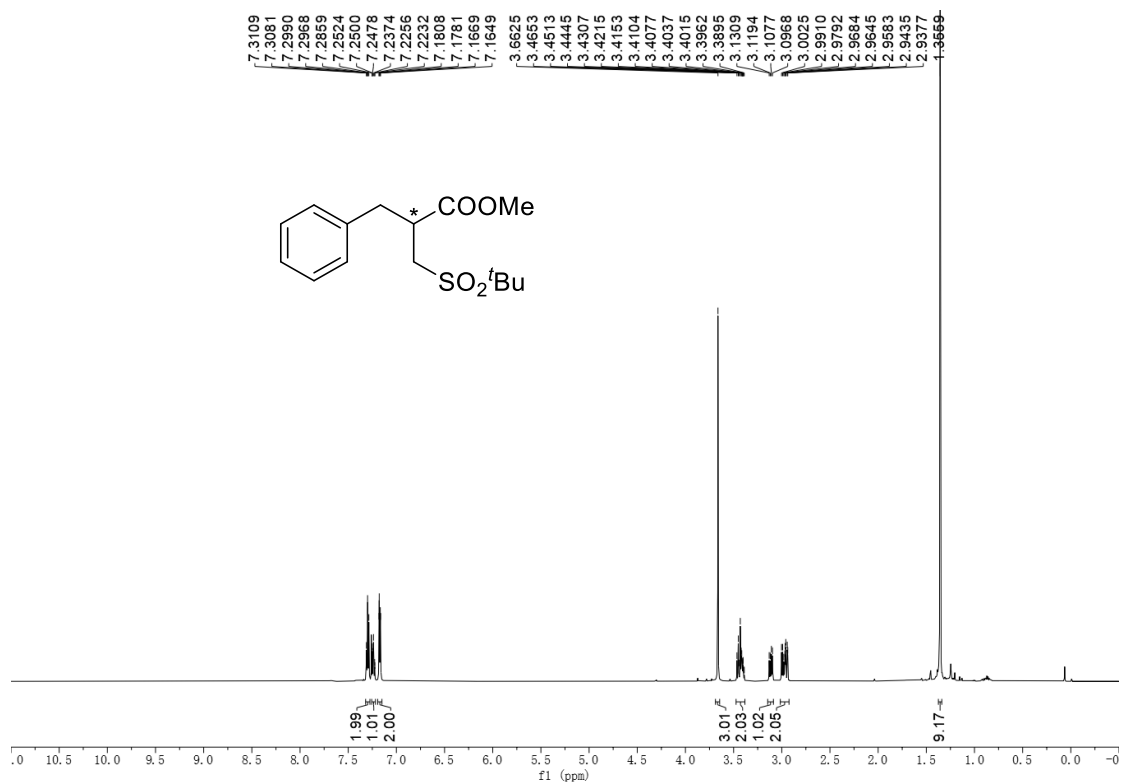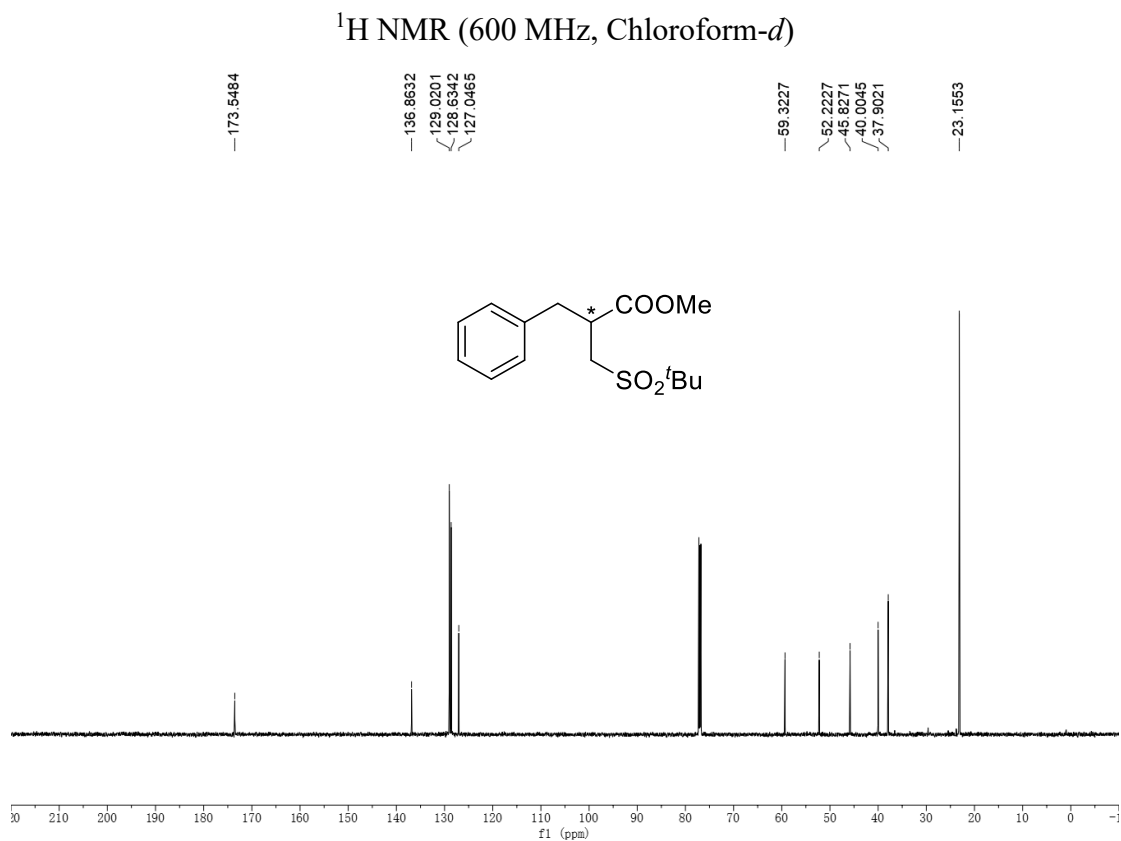

# Methyl 2-benzyl-3-phenoxypropanoate (**4f**)

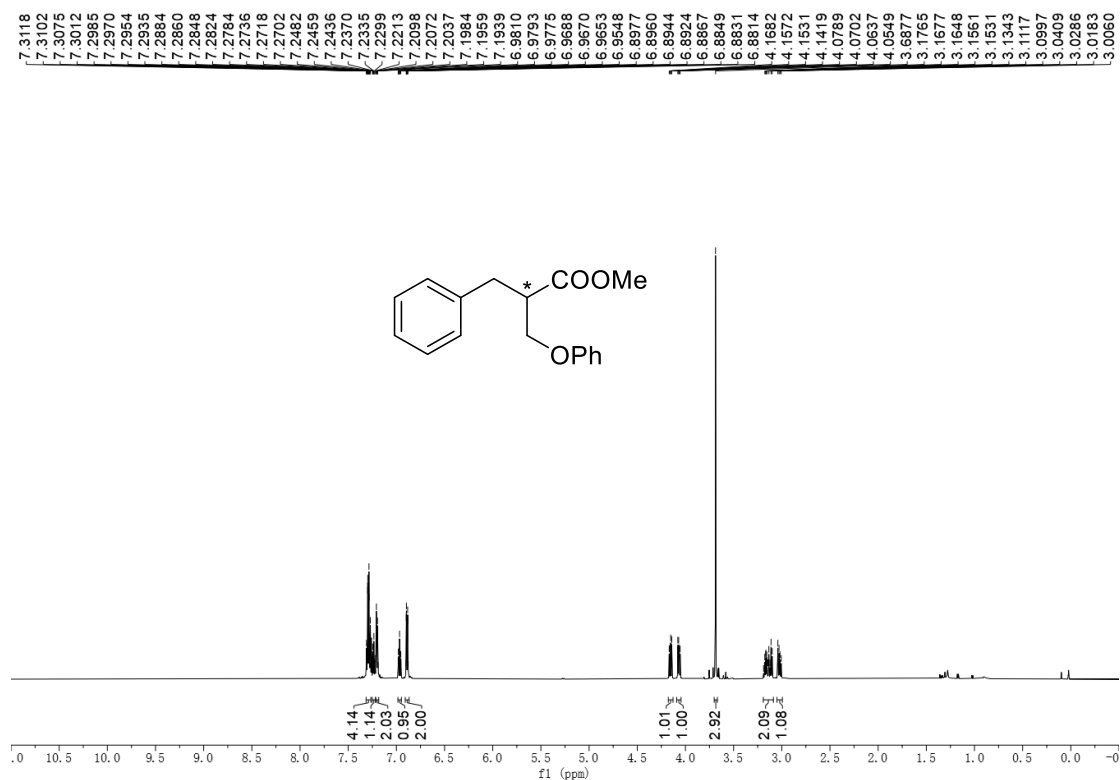

<sup>1</sup>H NMR (600 MHz, Chloroform-*d*)

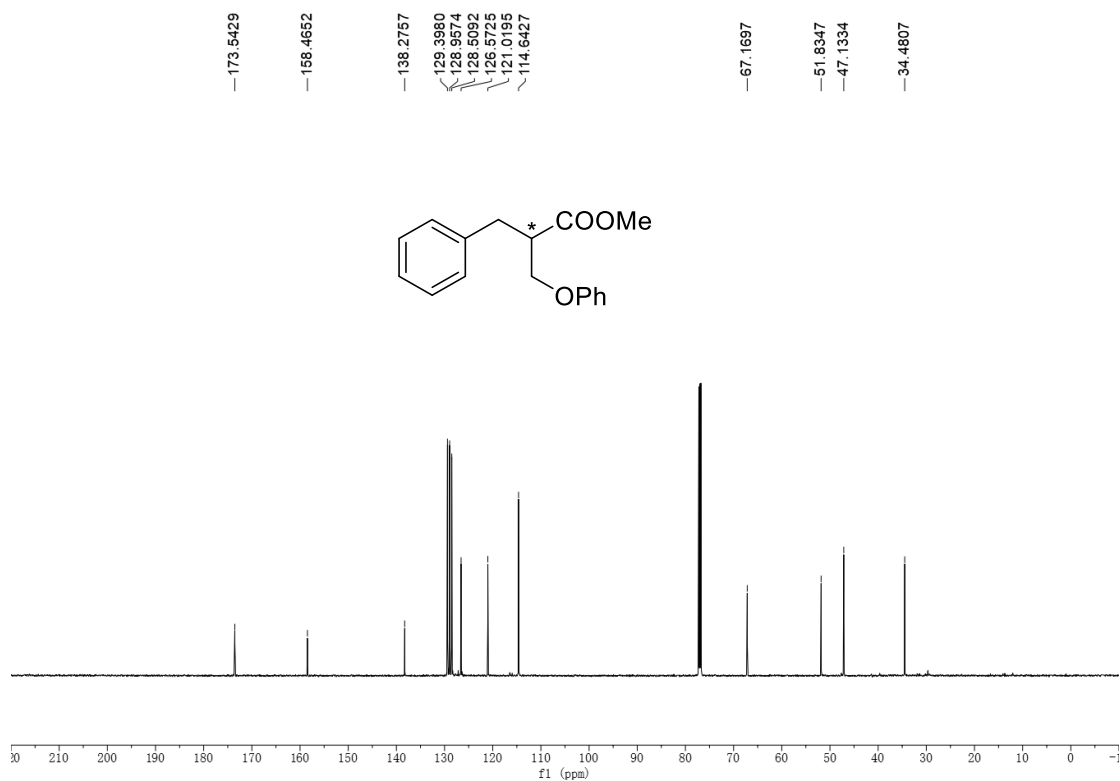

<sup>13</sup>C NMR (151 MHz, Chloroform-*d*)

Ethyl 2-benzyl-3-(phenylsulfonyl)propanoate (**4g**)

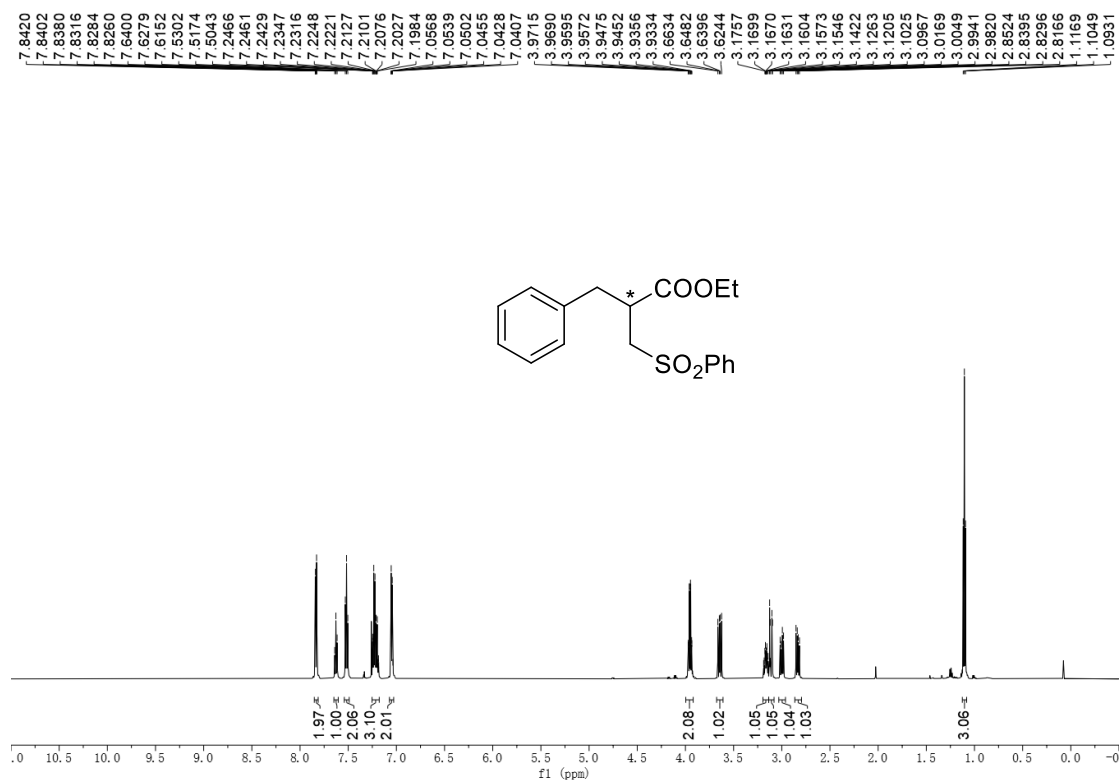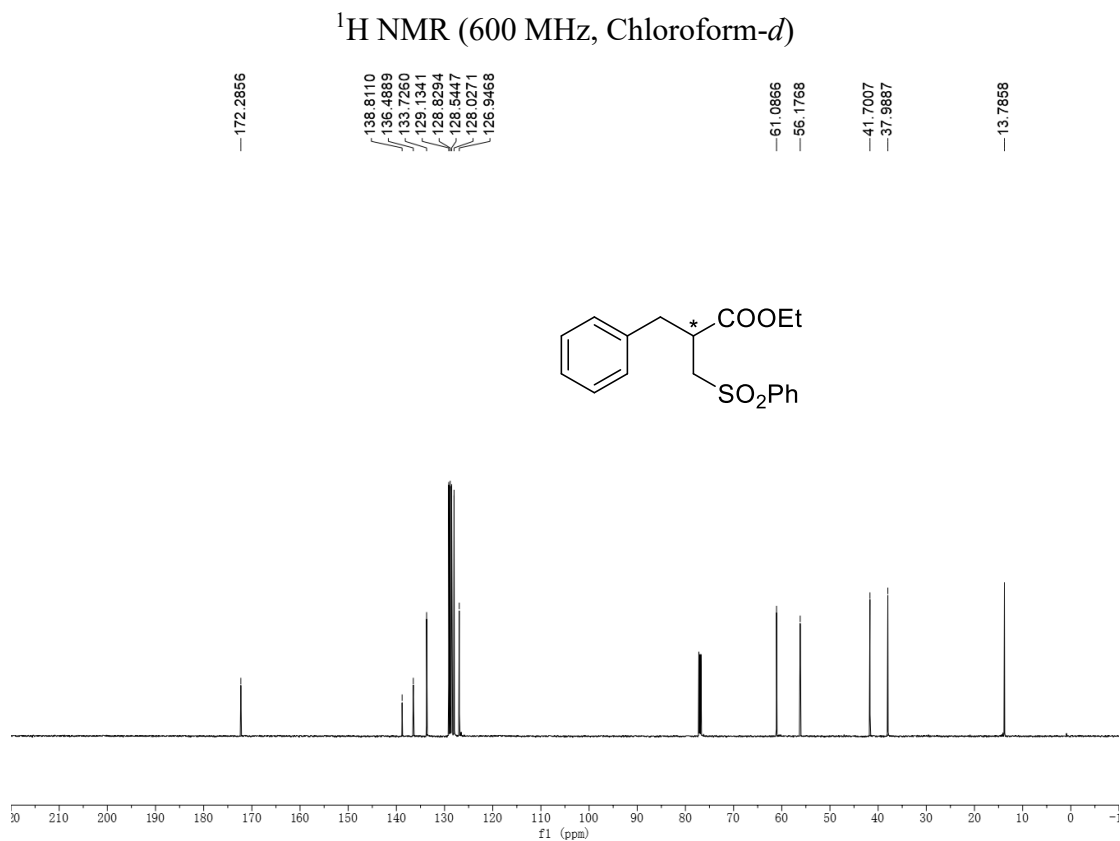

*Tert*-butyl 2-benzyl-3-(phenylsulfonyl)propanoate (**4h**)

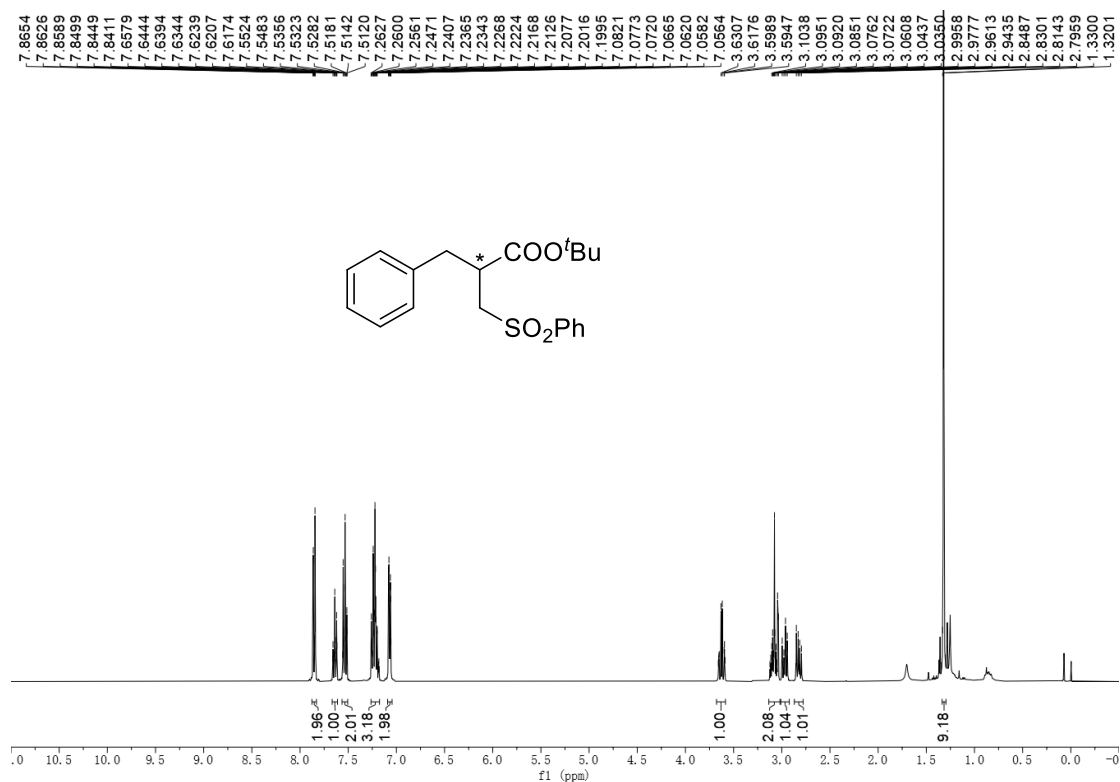

<sup>1</sup>H NMR (400 MHz, Chloroform-*d*)

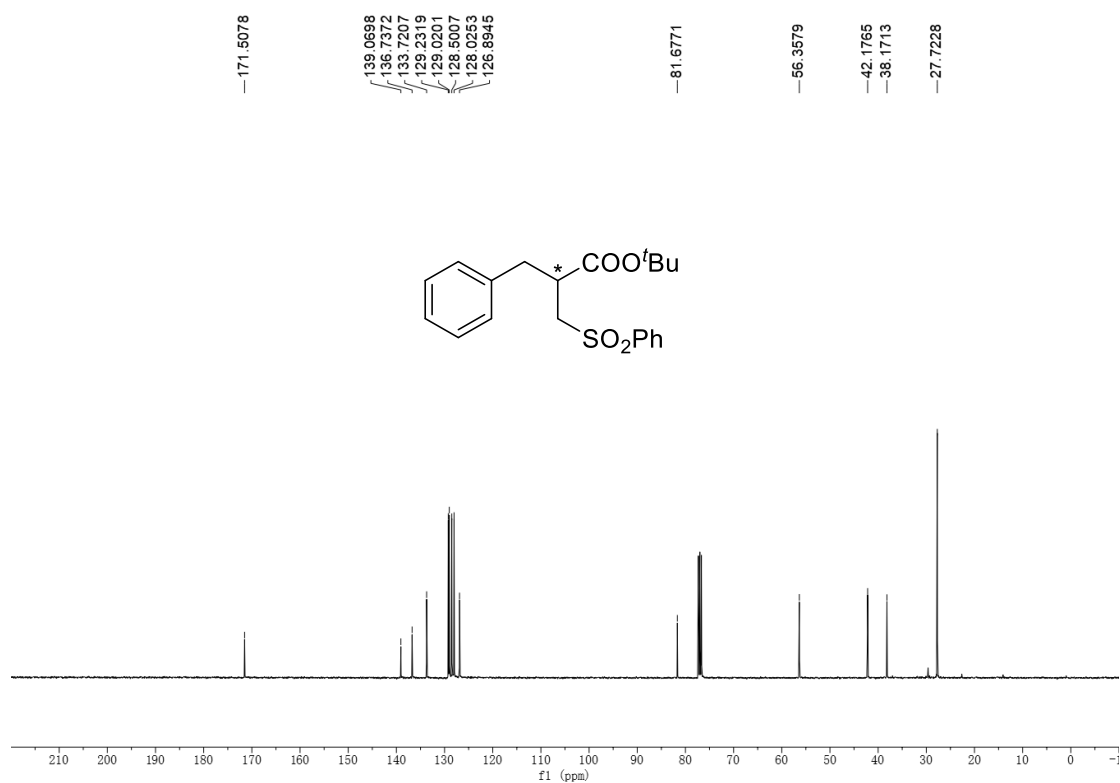

<sup>13</sup>C NMR (101 MHz, Chloroform-*d*)

2-Benzyl-3-(phenylsulfonyl)propanoic acid (**4i/4i'**)

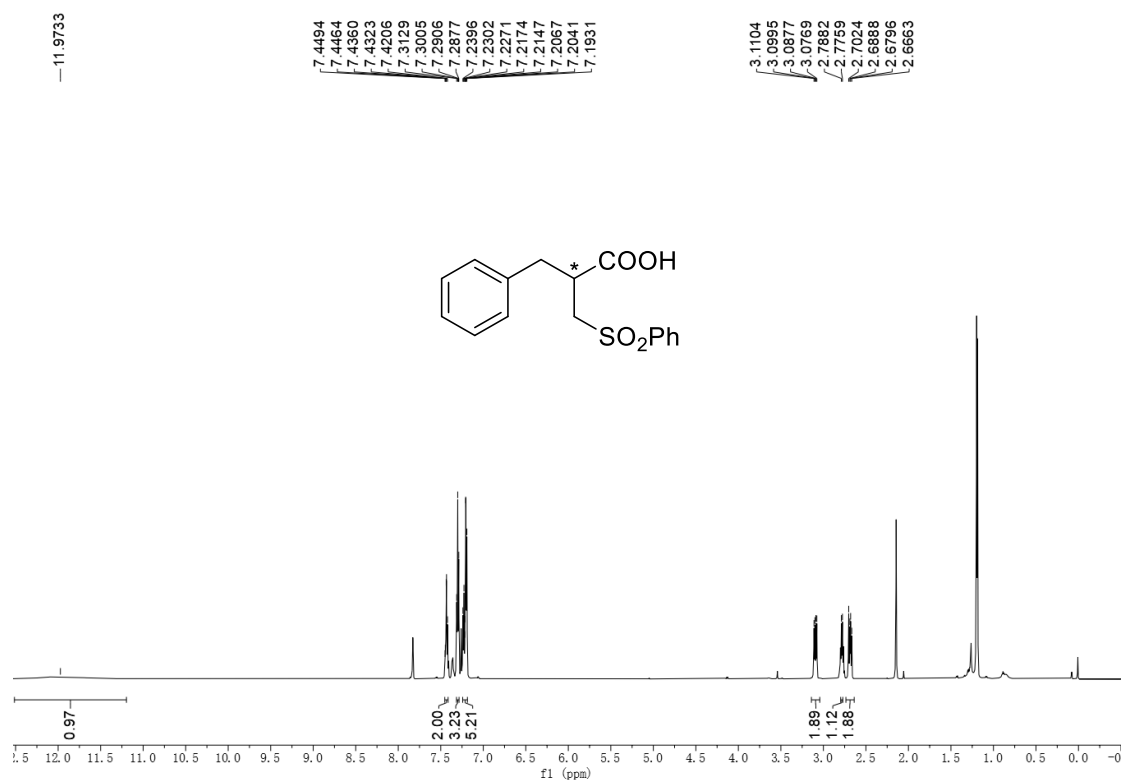

<sup>1</sup>H NMR (600 MHz, Chloroform-*d*)

2-Benzyl-*N*-phenyl-3-(phenylsulfonyl)propenamide (**4j/4j'**)

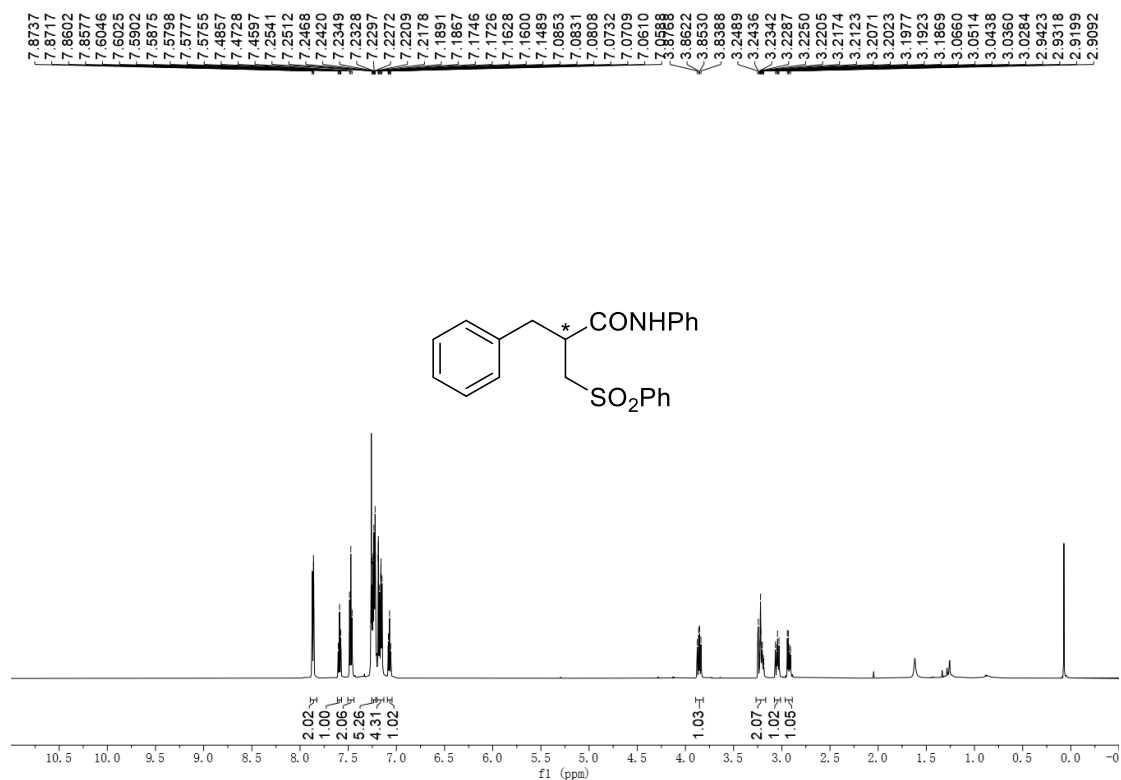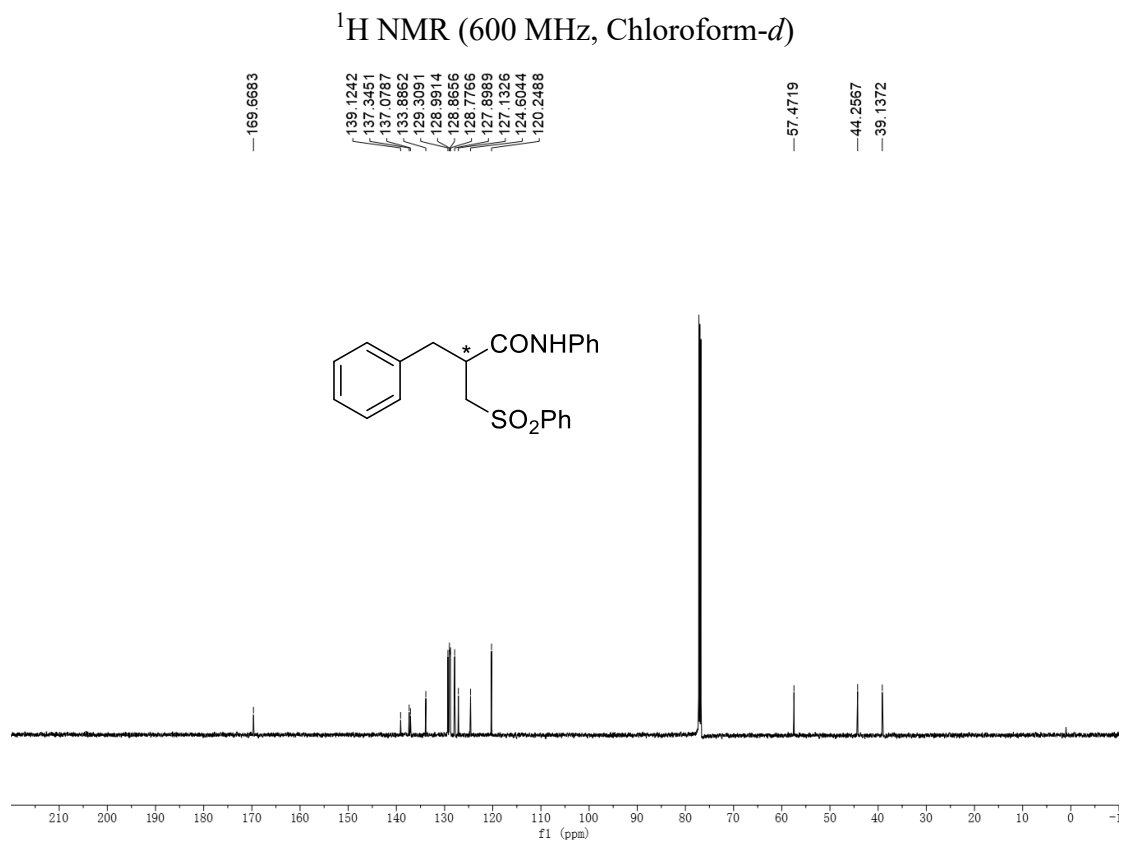

# Methyl 2-methyl-3-phenylpropanoate (**4k**)

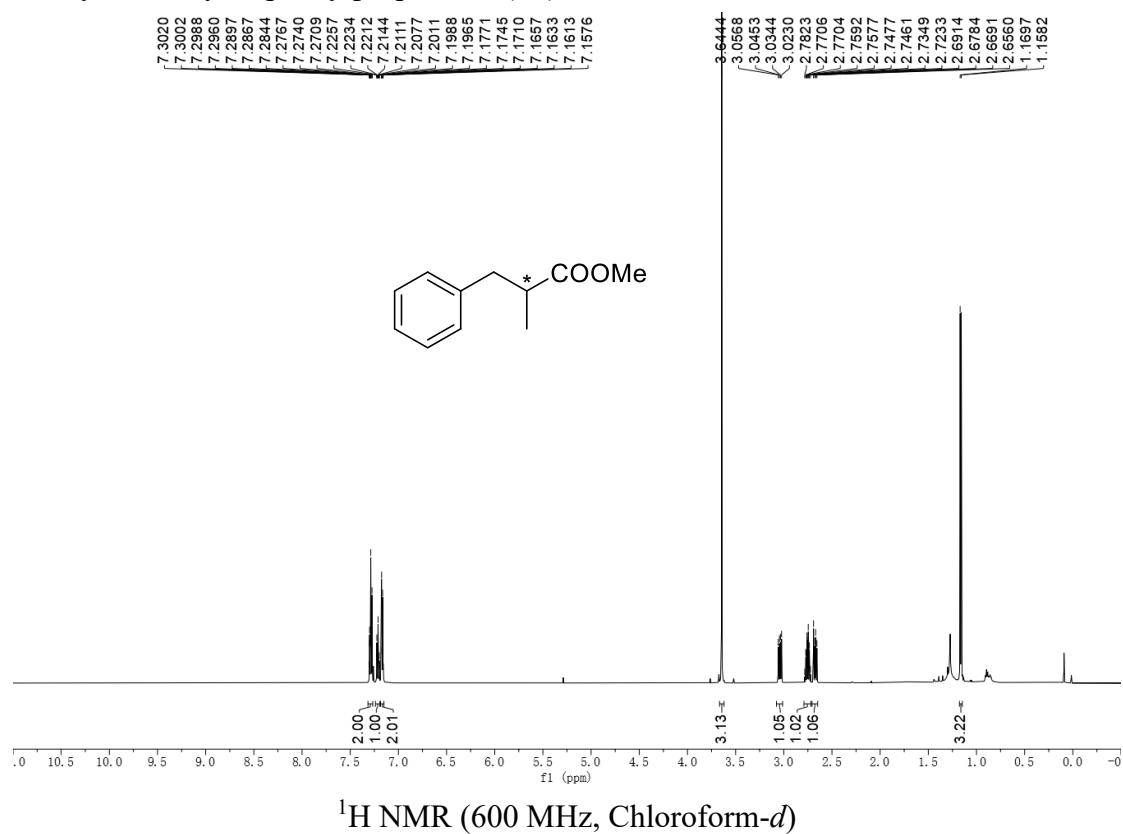



## Methyl 2-benzyl-3-(phenylsulfonyl)propanoate (**2a**)

Additional Info : Peak(s) manually integrated

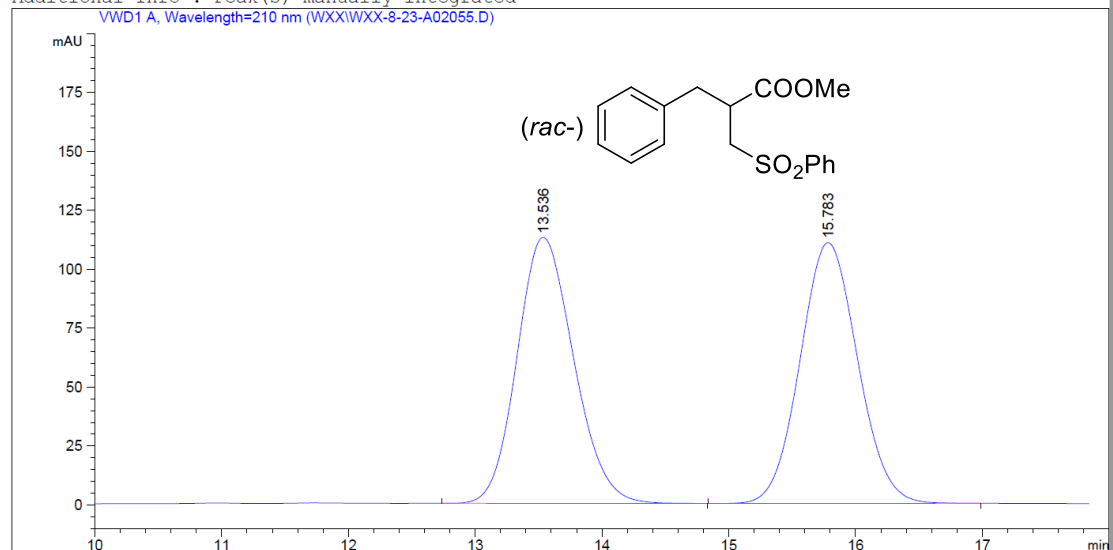

Additional Info : Peak(s) manually integrated

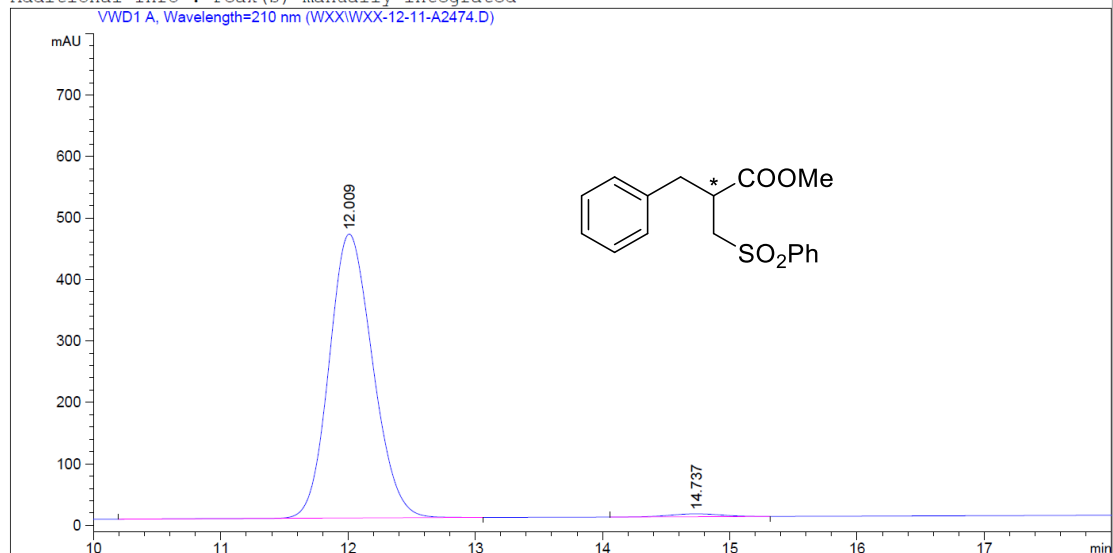

| Peak # | RetTime [min] | Type | Width [min] | Area [mAU*s] | Height [mAU] | Area %  |
|--------|---------------|------|-------------|--------------|--------------|---------|
| 1      | 12.009        | BB   | 0.3677      | 1.09579e4    | 461.96231    | 98.8040 |
| 2      | 14.737        | BB   | 0.4373      | 132.64473    | 4.68552      | 1.1960  |

Totals : 1.10906e4 466.64783

## Methyl 2-(4-methylbenzyl)-3-(phenylsulfonyl)propanoate (**2b**)

Additional Info : Peak(s) manually integrated

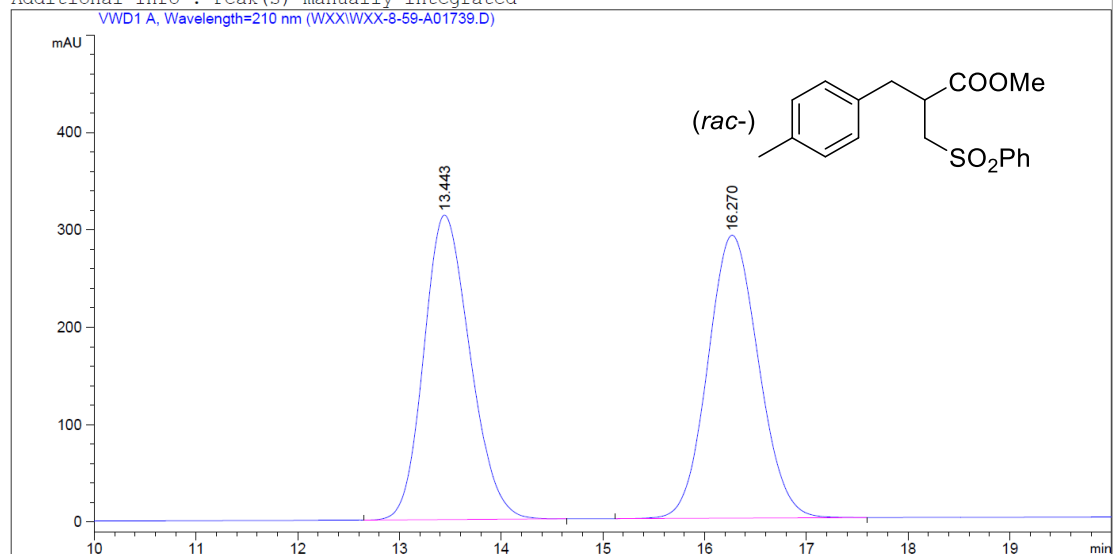

Additional Info : Peak(s) manually integrated

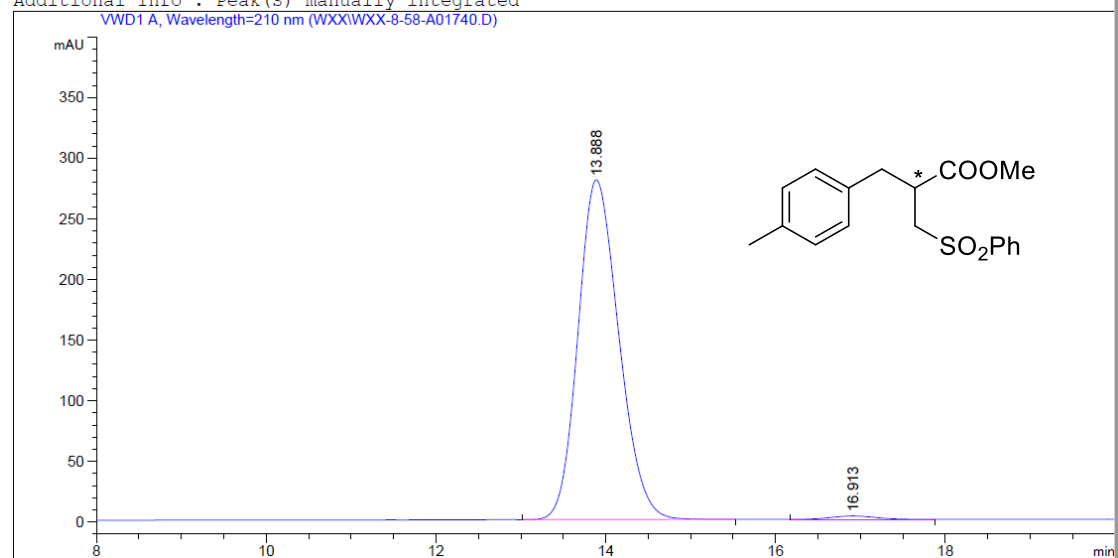

| Peak # | RetTime [min] | Type | Width [min] | Area [mAU*s] | Height [mAU] | Area %  |
|--------|---------------|------|-------------|--------------|--------------|---------|
| 1      | 13.888        | BB   | 0.5164      | 9348.04492   | 280.08875    | 98.9653 |
| 2      | 16.913        | BB   | 0.5330      | 97.73553     | 2.74083      | 1.0347  |

Totals : 9445.78045 282.82958

## Methyl 2-(4-methoxybenzyl)-3-(phenylsulfonyl)propanoate (**2c**)

Additional Info : Peak(s) manually integrated

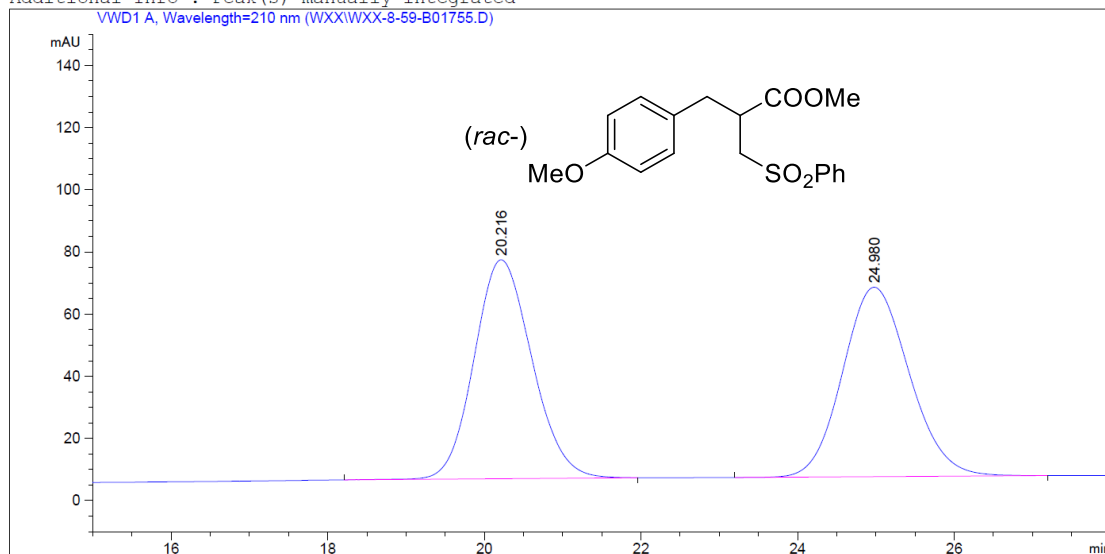

Additional Info : Peak(s) manually integrated

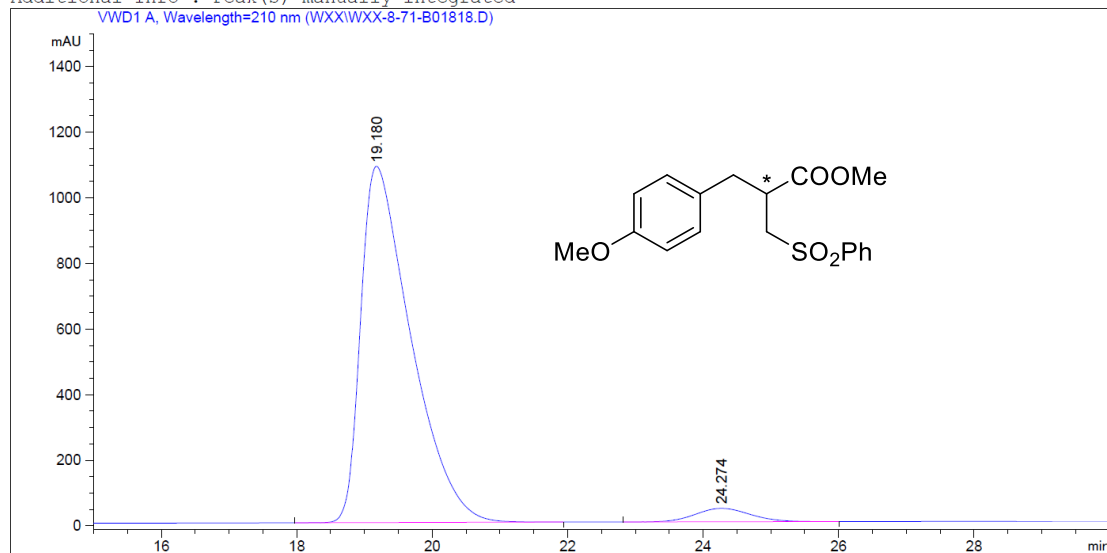

| Peak # | RetTime [min] | Type | Width [min] | Area [mAU*s] | Height [mAU] | Area %  |
|--------|---------------|------|-------------|--------------|--------------|---------|
| 1      | 19.180        | BB   | 0.7660      | 5.58199e4    | 1085.41919   | 96.0113 |
| 2      | 24.274        | BB   | 0.8773      | 2318.95435   | 41.03266     | 3.9887  |

Totals : 5.81388e4 1126.45185

# Methyl 2-(4-(benzyloxy)benzyl)-3-(phenylsulfonyl)propanoate (**2d**)

Additional Info : Peak(s) manually integrated

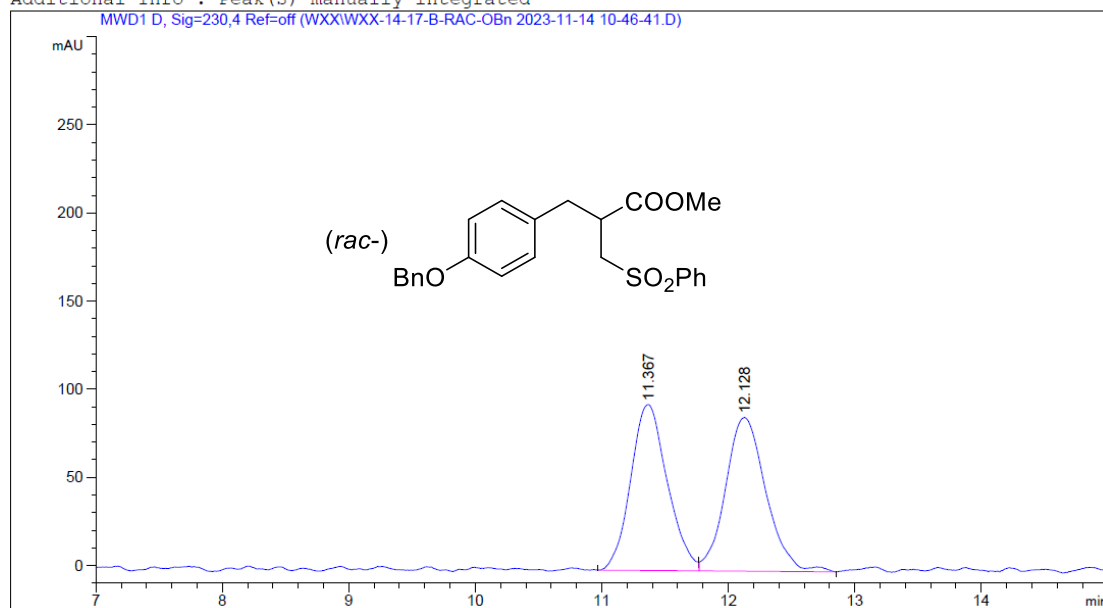

Additional Info : Peak(s) manually integrated

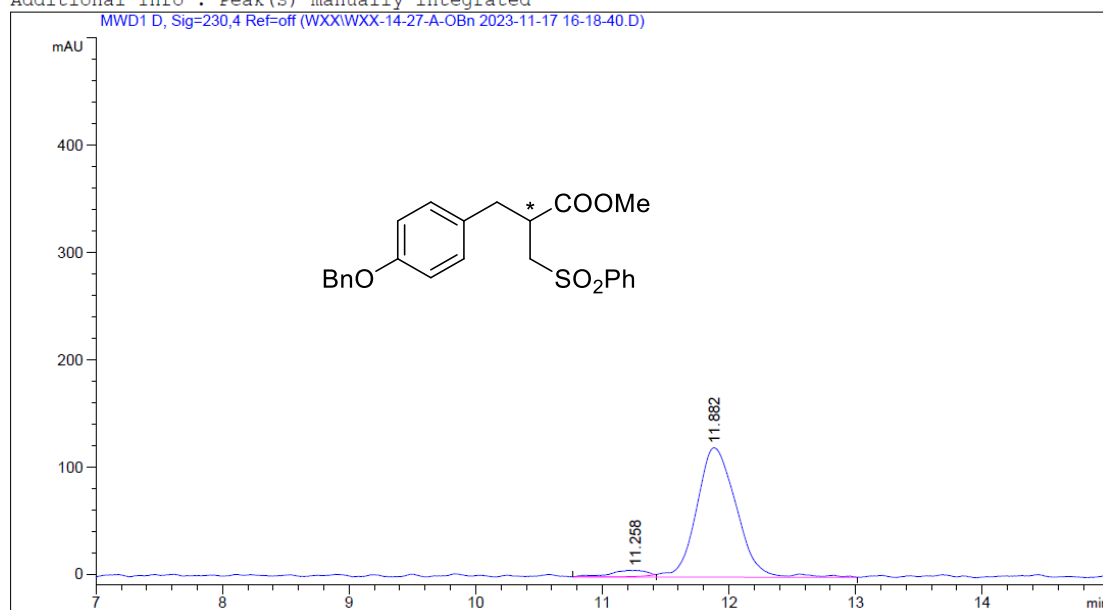

| Peak # | RetTime [min] | Type | Width [min] | Area [mAU*s] | Height [mAU] | Area %  |
|--------|---------------|------|-------------|--------------|--------------|---------|
| 1      | 11.258        | BV E | 0.2475      | 117.27170    | 5.64162      | 4.2390  |
| 2      | 11.882        | VV R | 0.3201      | 2649.19067   | 120.64447    | 95.7610 |

Totals : 2766.46237 126.28609

# 4-(3-Methoxy-3-oxo-2-((phenylsulfonyl)methyl)propyl)phenyl benzoate (2e)

Additional Info : Peak(s) manually integrated

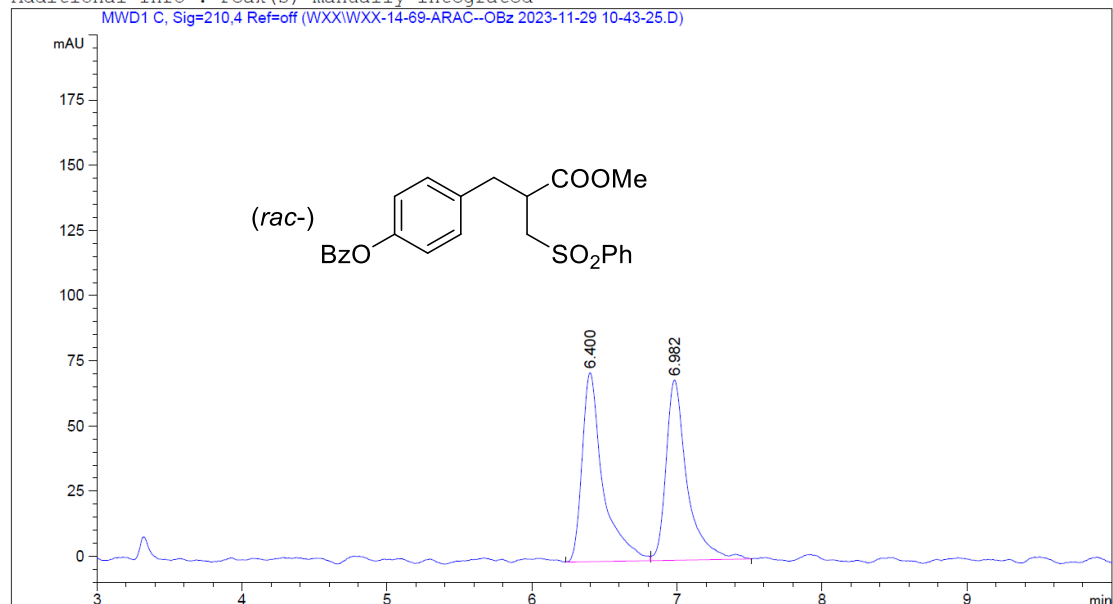

Additional Info : Peak(s) manually integrated

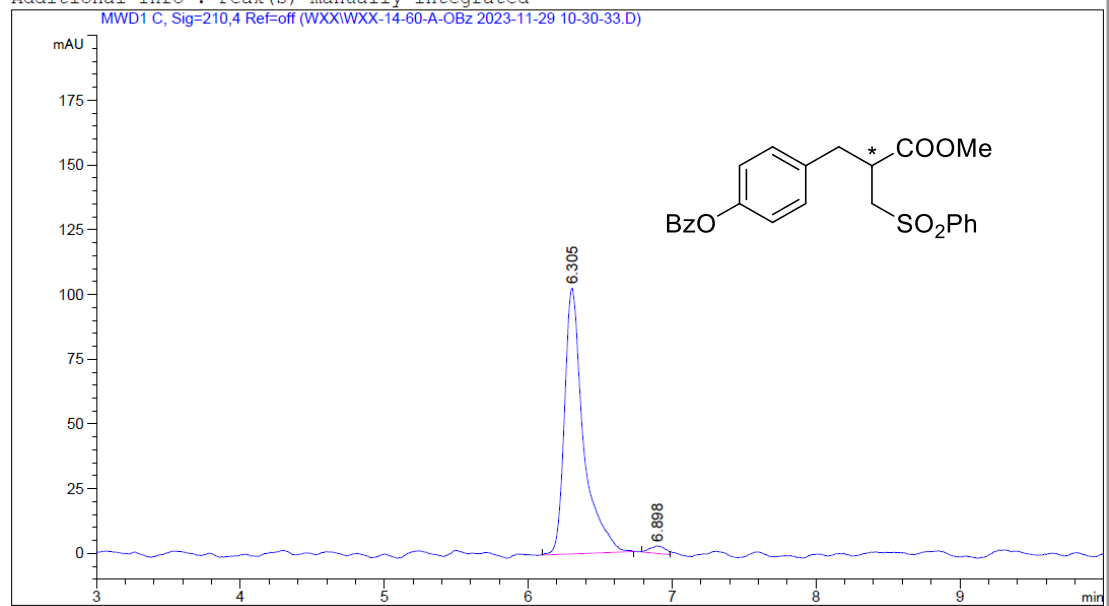

| Peak # | RetTime [min] | Type | Width [min] | Area [mAU*s] | Height [mAU] | Area %  |
|--------|---------------|------|-------------|--------------|--------------|---------|
| 1      | 6.305         | VV R | 0.1320      | 936.75104    | 102.63485    | 97.8102 |
| 2      | 6.898         | BV   | 0.0862      | 20.97224     | 2.95778      | 2.1898  |

Totals : 957.72328 105.59263

4-(3-Methoxy-3-oxo-2-((phenylsulfonyl)methyl)propyl)phenyl 4-methoxybenzoate  
(2f)

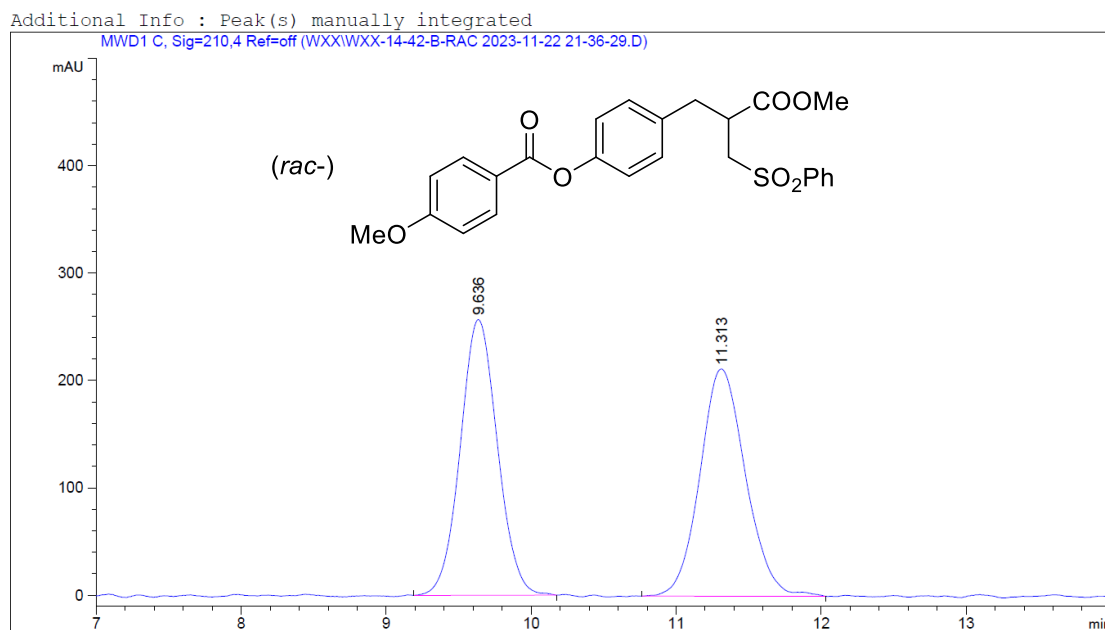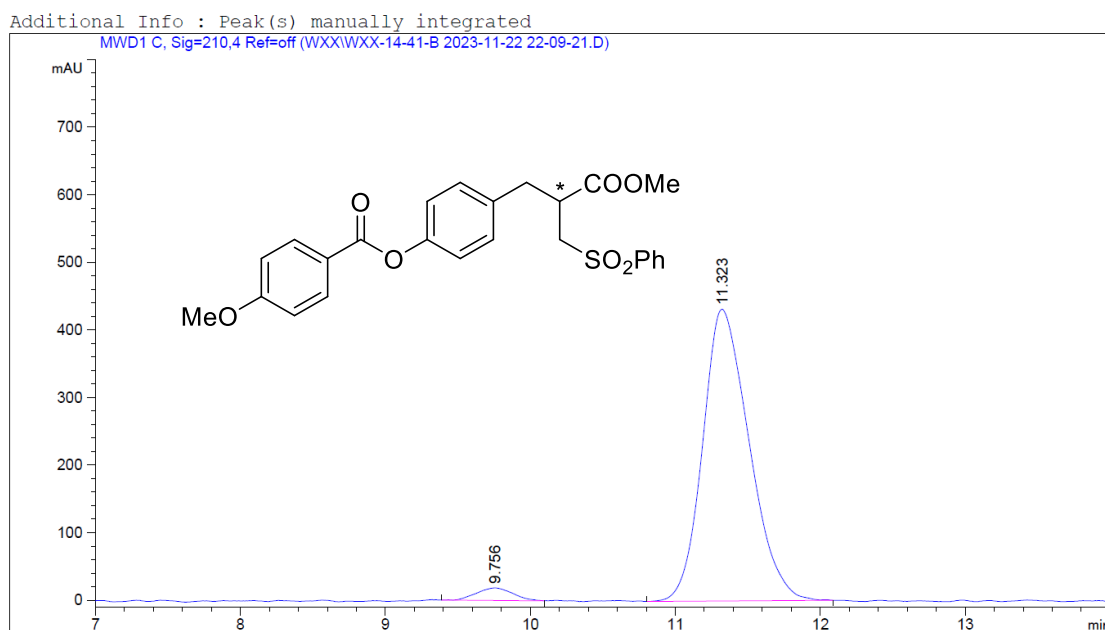

| Peak # | RetTime [min] | Type | Width [min] | Area [mAU*s] | Height [mAU] | Area %  |
|--------|---------------|------|-------------|--------------|--------------|---------|
| 1      | 9.756         | VB R | 0.2065      | 321.12201    | 18.59181     | 3.2342  |
| 2      | 11.323        | VV R | 0.2951      | 9607.85059   | 431.74139    | 96.7658 |

Totals : 9928.97260 450.33320

# Methyl 2-((4-(((benzyloxy)carbonyl)oxy)benzyl)-3-(phenylsulfonyl)propanoate (**2g**)

Additional Info : Peak(s) manually integrated

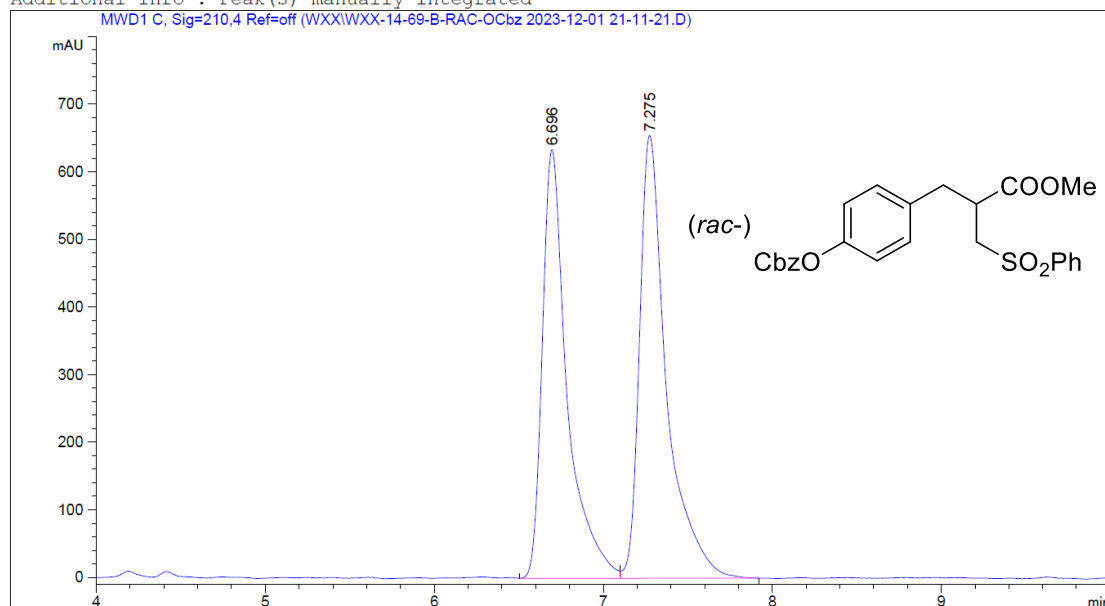

Additional Info : Peak(s) manually integrated

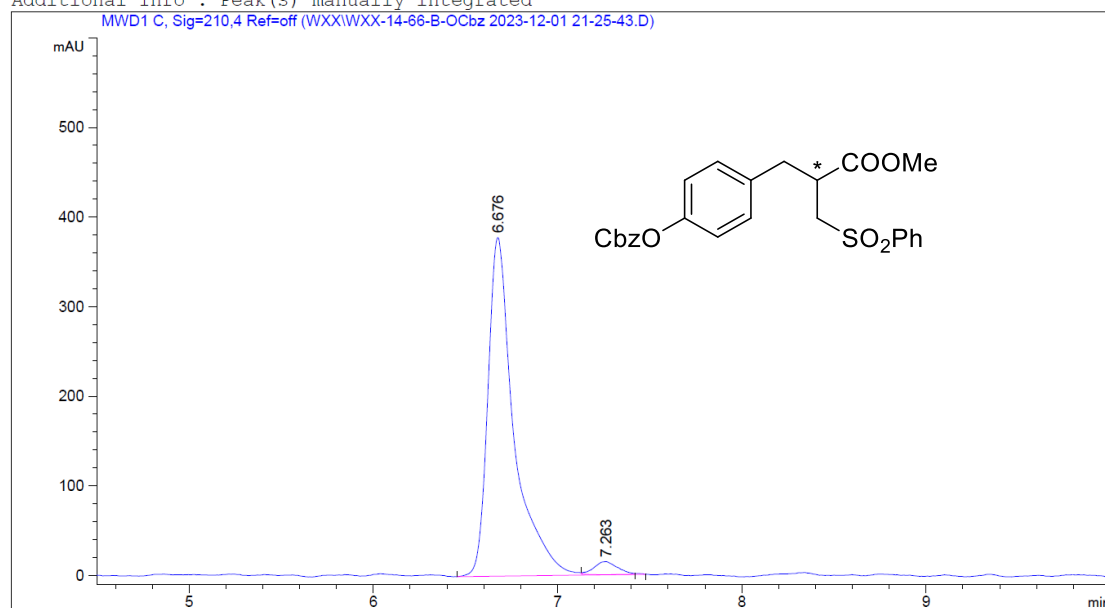

| Peak # | RetTime [min] | Type | Width [min] | Area [mAU*s] | Height [mAU] | Area %  |
|--------|---------------|------|-------------|--------------|--------------|---------|
| 1      | 6.676         | BV R | 0.1436      | 3728.74487   | 377.96875    | 96.6770 |
| 2      | 7.263         | VV E | 0.1080      | 128.16551    | 14.58389     | 3.3230  |

Totals : 3856.91039 392.55264

# Methyl 2-(4-hydroxybenzyl)-3-(phenylsulfonyl)propanoate (**2h**)

Additional Info : Peak(s) manually integrated

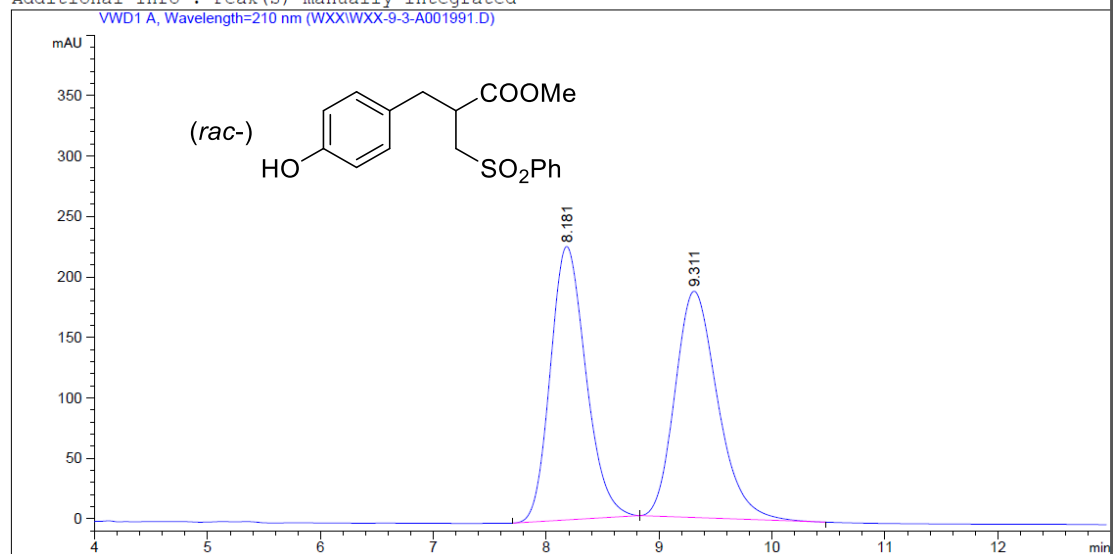

Additional Info : Peak(s) manually integrated

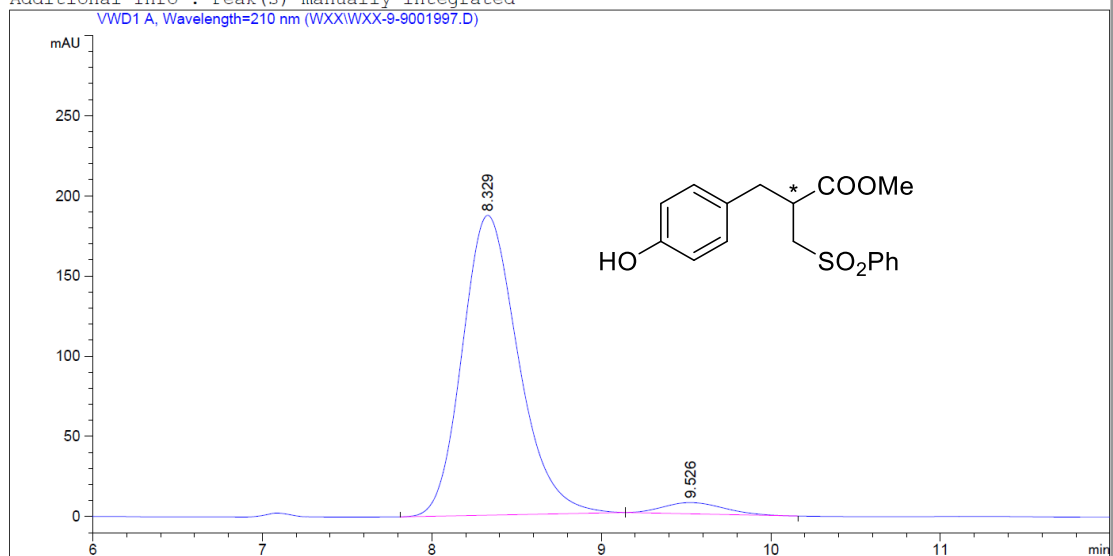

| Peak # | RetTime [min] | Type | Width [min] | Area [mAU*s] | Height [mAU] | Area %  |
|--------|---------------|------|-------------|--------------|--------------|---------|
| 1      | 8.329         | BB   | 0.3538      | 4288.23389   | 186.83214    | 96.1115 |
| 2      | 9.526         | BB   | 0.3906      | 173.49446    | 7.01293      | 3.8885  |

Totals : 4461.72835 193.84507



(S)-Methyl 2-(4-bromobenzyl)-3-(phenylsulfonyl)propanoate (**2i**)

Additional Info : Peak(s) manually integrated  
VWD1 A, Wavelength=210 nm (WXX\WXX-8-64-A01758.D)

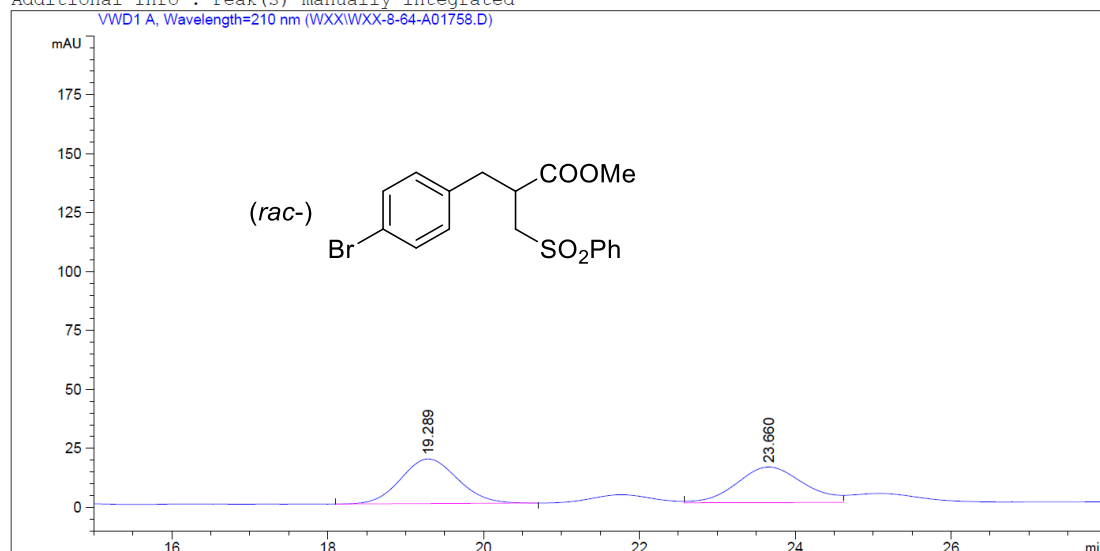

Additional Info : Peak(s) manually integrated  
VWD1 A, Wavelength=210 nm (WXX\WXX-8-44-A01769.D)

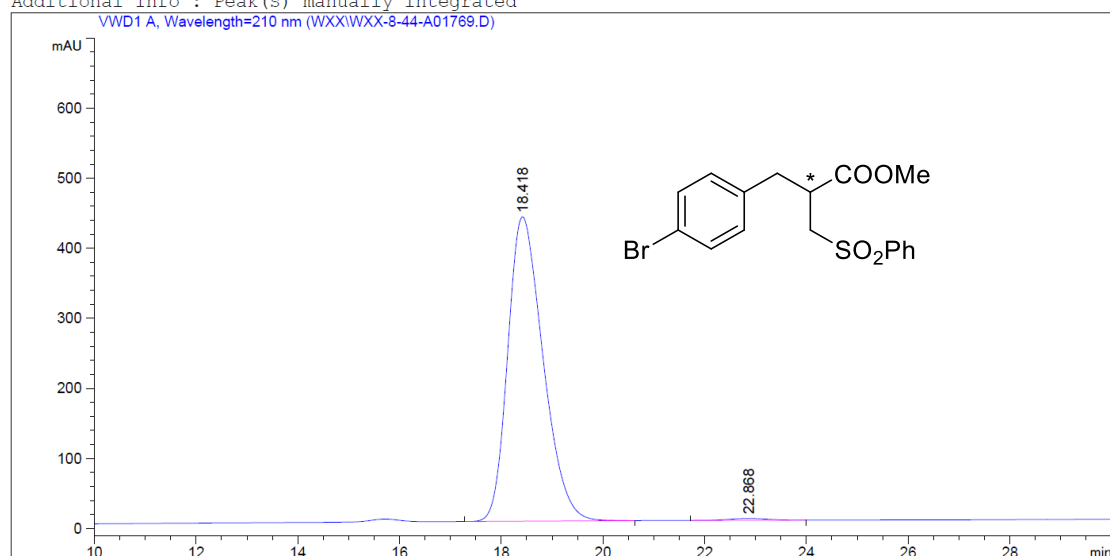

| Peak # | RetTime [min] | Type | Width [min] | Area [mAU*s] | Height [mAU] | Area %  |
|--------|---------------|------|-------------|--------------|--------------|---------|
| 1      | 18.418        | BB   | 0.7411      | 2.09289e4    | 434.41965    | 99.3567 |
| 2      | 22.868        | BB   | 0.7705      | 135.49841    | 2.51530      | 0.6433  |

Totals : 2.10644e4 436.93494

# Methyl 2-(4-nitrobenzyl)-3-(phenylsulfonyl)propanoate (2j)

Additional Info : Peak(s) manually integrated

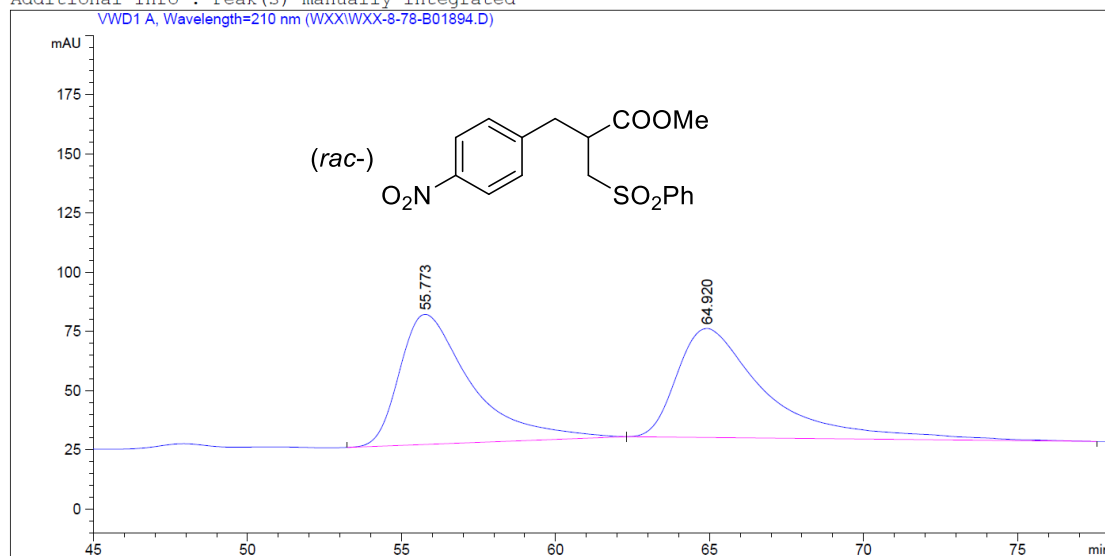

Additional Info : Peak(s) manually integrated

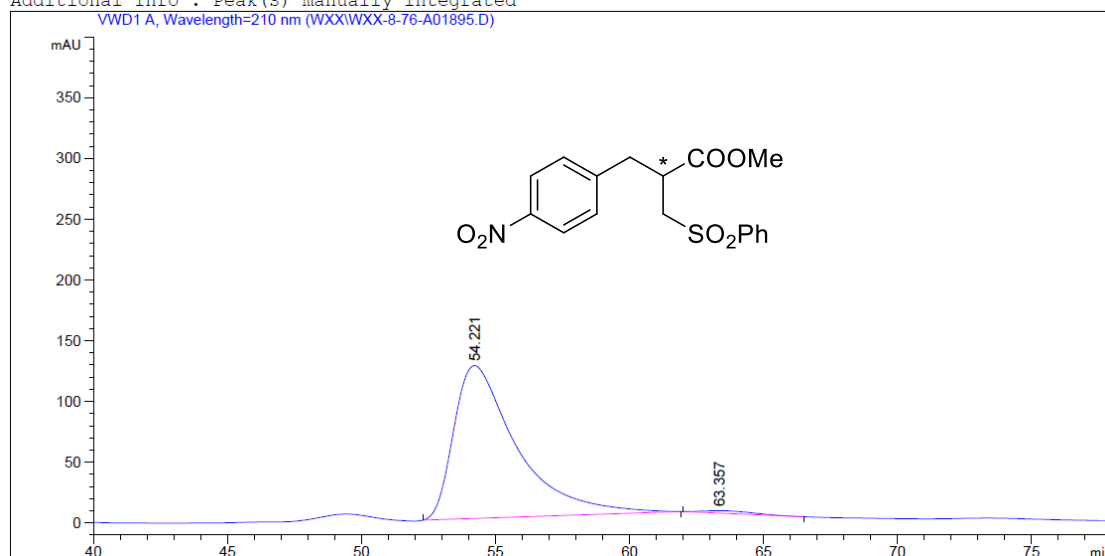

| Peak # | RetTime [min] | Type | Width [min] | Area [mAU*s] | Height [mAU] | Area %  |
|--------|---------------|------|-------------|--------------|--------------|---------|
| 1      | 54.221        | BB   | 2.2572      | 2.06254e4    | 125.83629    | 98.7063 |
| 2      | 63.357        | BB   | 1.5965      | 270.32550    | 1.97915      | 1.2937  |

Totals : 2.08957e4 127.81543

## Methyl 2-(3-methylbenzyl)-3-(phenylsulfonyl)propanoate (**2k**)

Additional Info : Peak(s) manually integrated

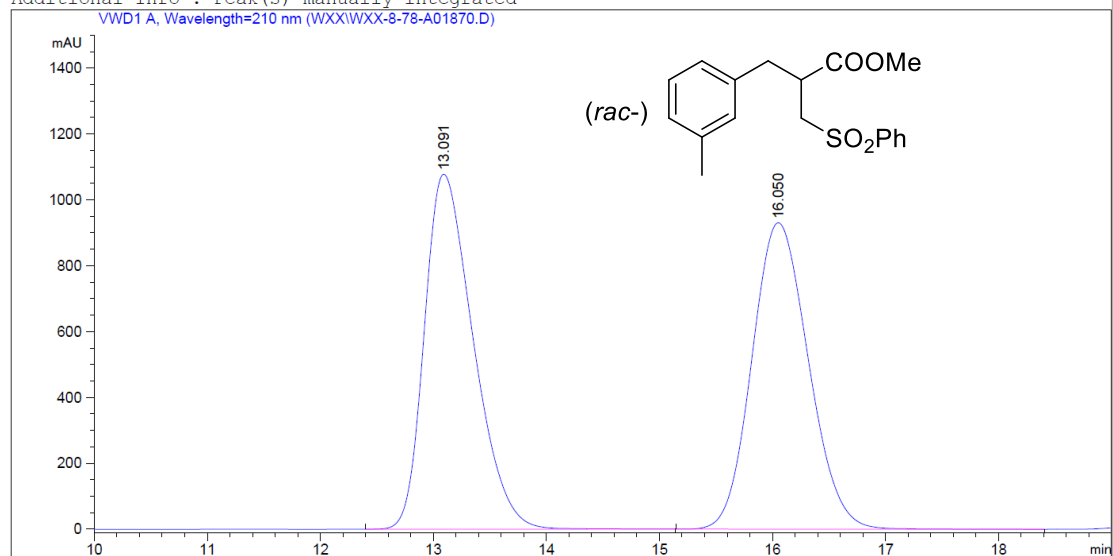

Additional Info : Peak(s) manually integrated

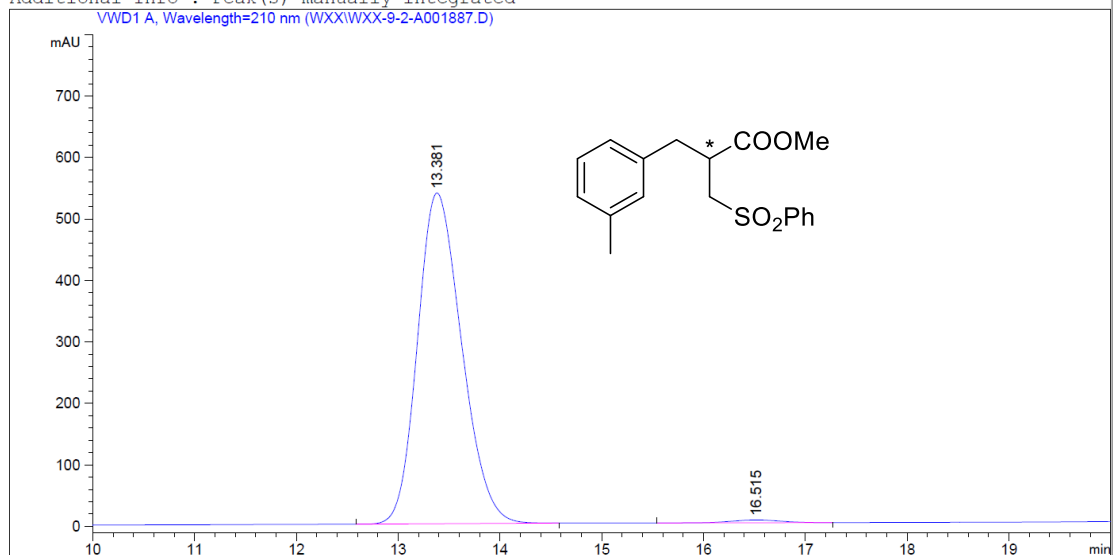

| Peak # | RetTime [min] | Type | Width [min] | Area [mAU*s] | Height [mAU] | Area %  |
|--------|---------------|------|-------------|--------------|--------------|---------|
| 1      | 13.381        | BB   | 0.4670      | 1.61850e4    | 537.98120    | 99.0584 |
| 2      | 16.515        | BB   | 0.5354      | 153.84949    | 4.49357      | 0.9416  |

Totals : 1.63389e4 542.47477

## Methyl 2-(3-methoxybenzyl)-3-(phenylsulfonyl)propanoate (**2l**)

Additional Info : Peak(s) manually integrated

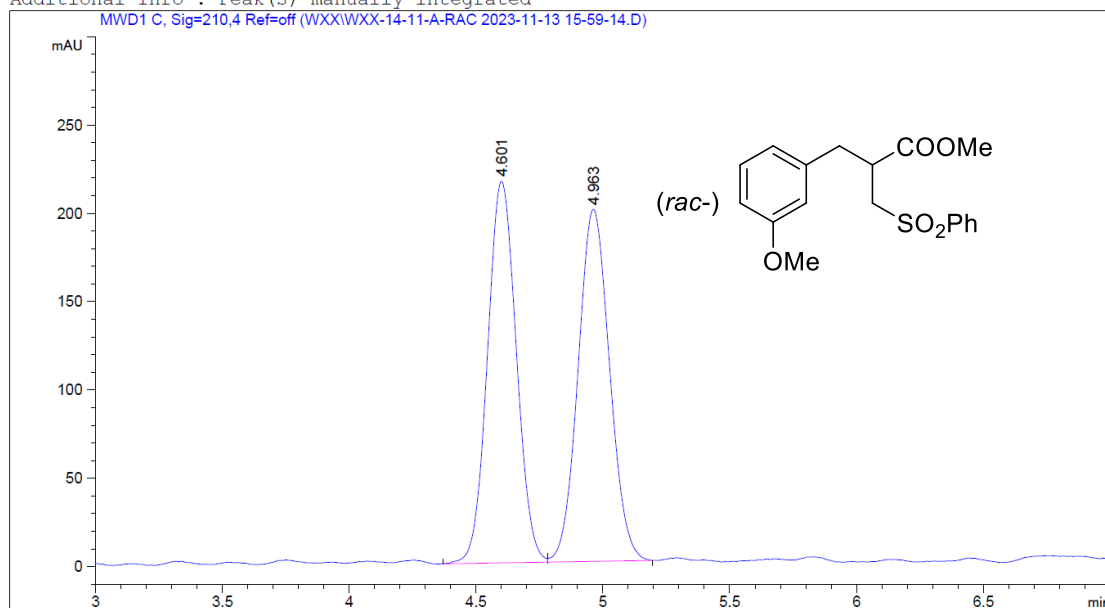

Additional Info : Peak(s) manually integrated

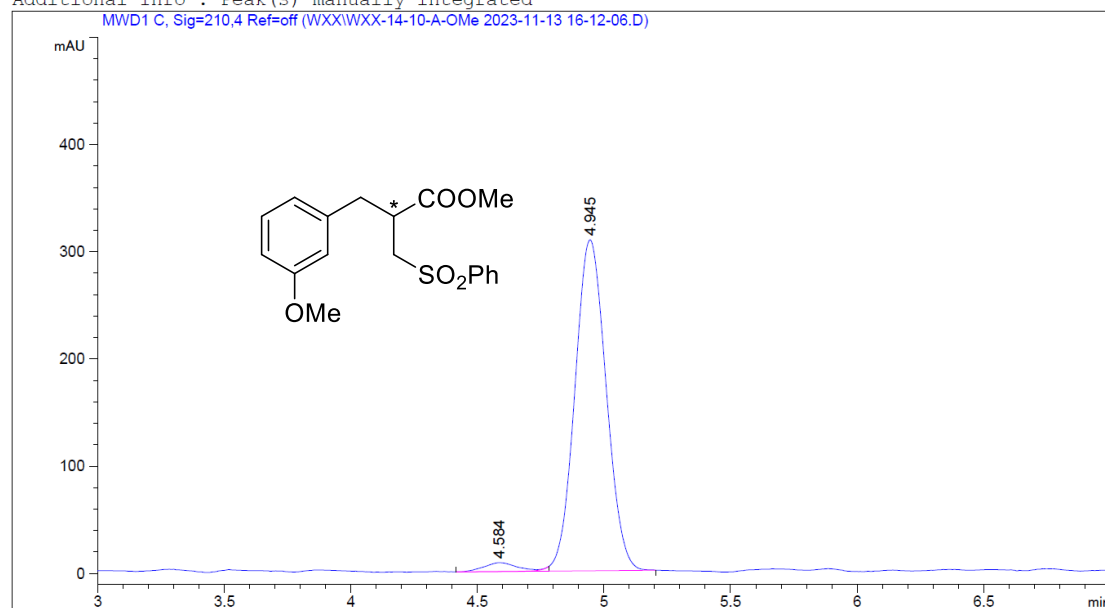

| Peak # | RetTime [min] | Type | Width [min] | Area [mAU*s] | Height [mAU] | Area %  |
|--------|---------------|------|-------------|--------------|--------------|---------|
| 1      | 4.584         | BV E | 0.1082      | 74.86328     | 8.34327      | 2.7491  |
| 2      | 4.945         | VB R | 0.1341      | 2648.30957   | 308.63998    | 97.2509 |

Totals : 2723.17285 316.98325

# Methyl 2-(3-fluorobenzyl)-3-(phenylsulfonyl)propanoate (**2m**)

Additional Info : Peak(s) manually integrated

MWD1 C, Sig=210,4 Ref=off (WXX\WXX-9-28-A-3-F-RAC 2023-05-25 18-01-14.D)

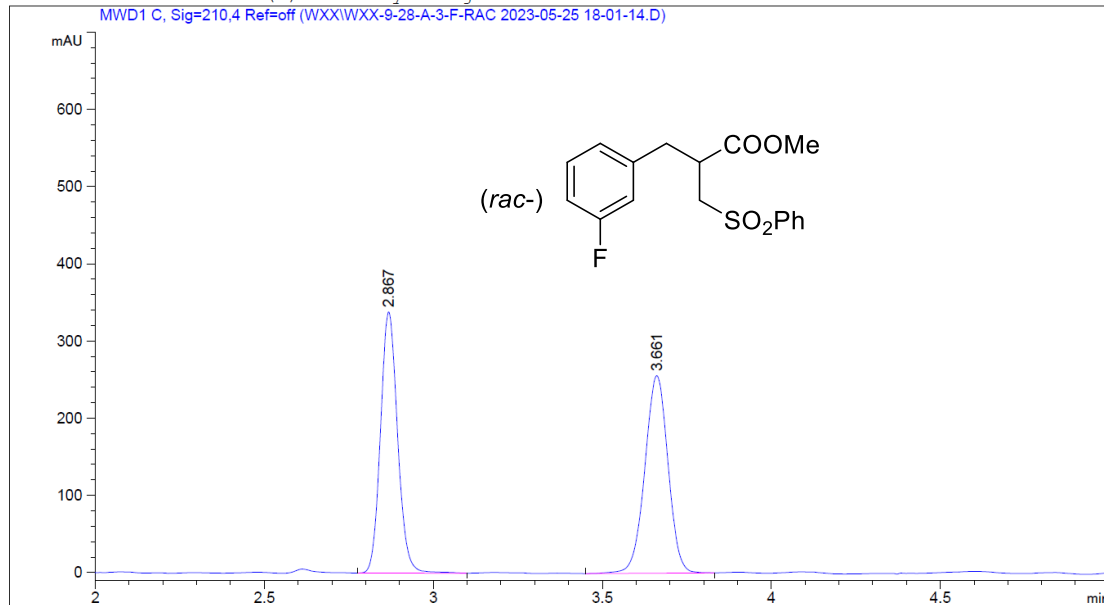

Additional Info : Peak(s) manually integrated

MWD1 C, Sig=210,4 Ref=off (WXX\WXX-9-27-A-3-F 2023-05-25 17-16-01.D)

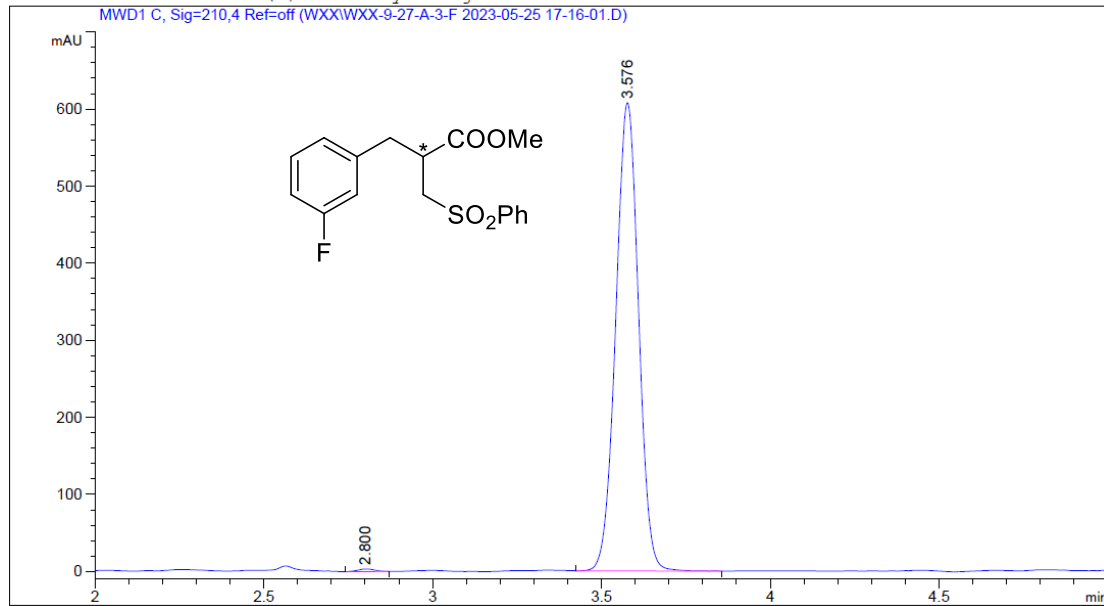

| Peak # | RetTime [min] | Type | Width [min] | Area [mAU*s] | Height [mAU] | Area %  |
|--------|---------------|------|-------------|--------------|--------------|---------|
| 1      | 2.800         | BB   | 0.0466      | 11.93172     | 3.42624      | 0.4175  |
| 2      | 3.576         | BV R | 0.0726      | 2845.84570   | 607.60809    | 99.5825 |

Totals : 2857.77742 611.03434

# Methyl 2-(3-bromobenzyl)-3-(phenylsulfonyl)propanoate (**2n**)

Additional Info : Peak(s) manually integrated

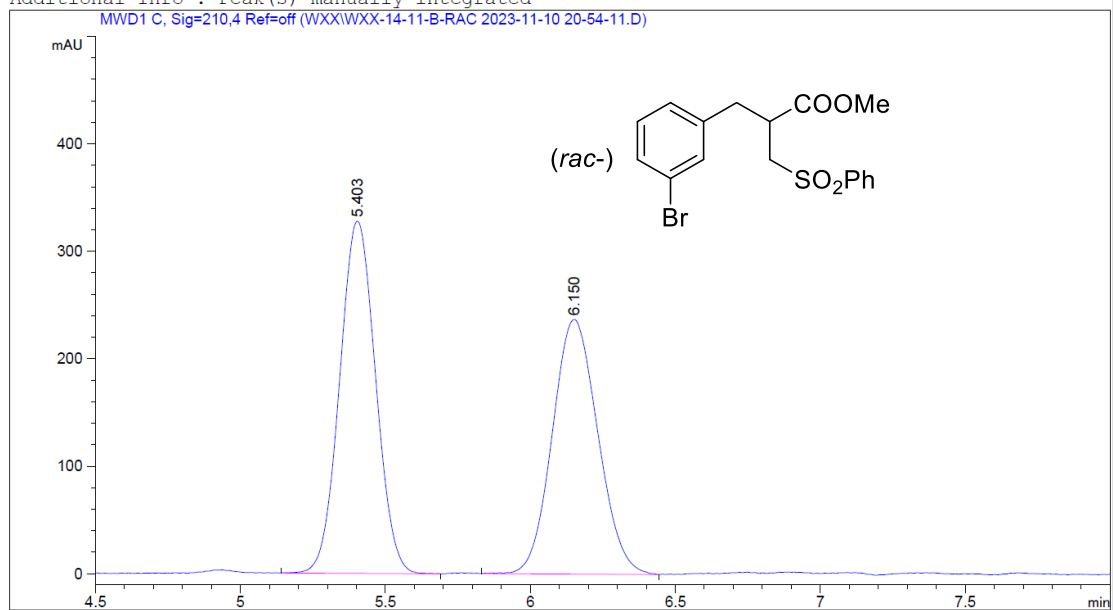

Additional Info : Peak(s) manually integrated

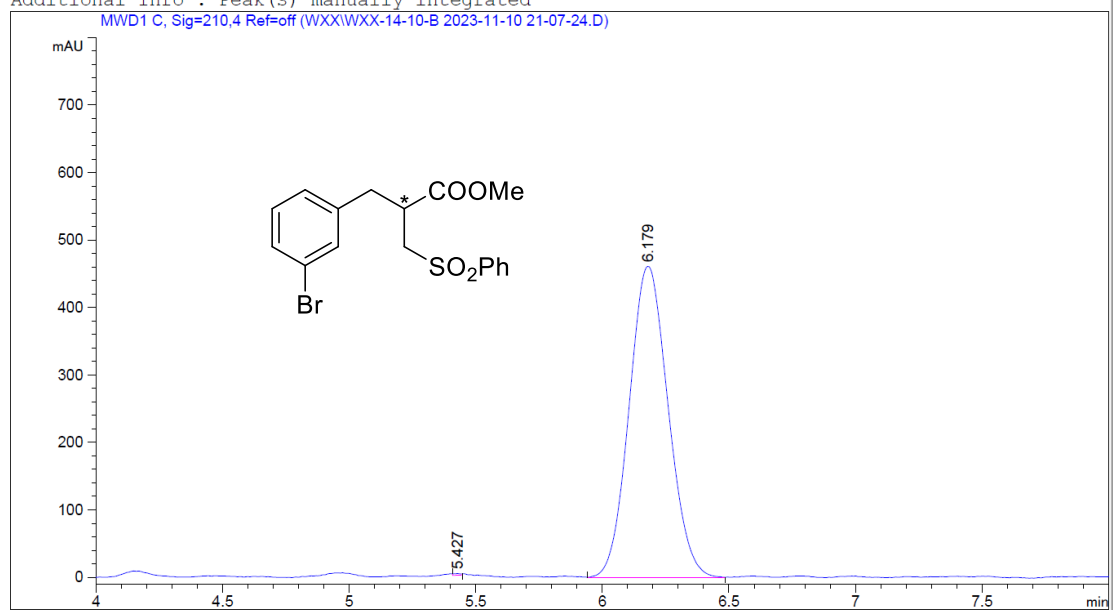

| Peak # | RetTime [min] | Type | Width [min] | Area [mAU*s] | Height [mAU] | Area %  |
|--------|---------------|------|-------------|--------------|--------------|---------|
| 1      | 5.427         | VV   | 0.0260      | 4.80424      | 2.44031      | 0.0976  |
| 2      | 6.179         | BB   | 0.1476      | 4919.75488   | 460.69174    | 99.9024 |

Totals : 4924.55913 463.13205

# Methyl 2-(2-fluorobenzyl)-3-(phenylsulfonyl)propanoate (**2o**)

Additional Info : Peak(s) manually integrated

MWD1 C, Sig=210,4 Ref=off (WXXI\WXX-11-22-RAC-2-F 2023-07-24 17-24-57.D)

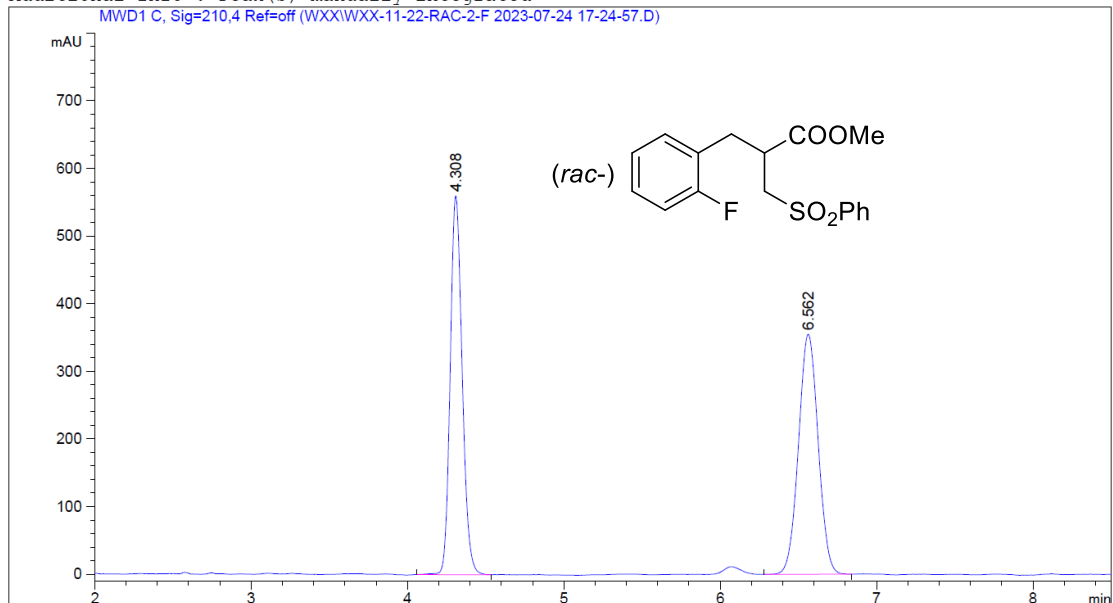

Additional Info : Peak(s) manually integrated

MWD1 C, Sig=210,4 Ref=off (WXXI\WXX-10-9-A-2-F 2023-07-24 16-41-10.D)

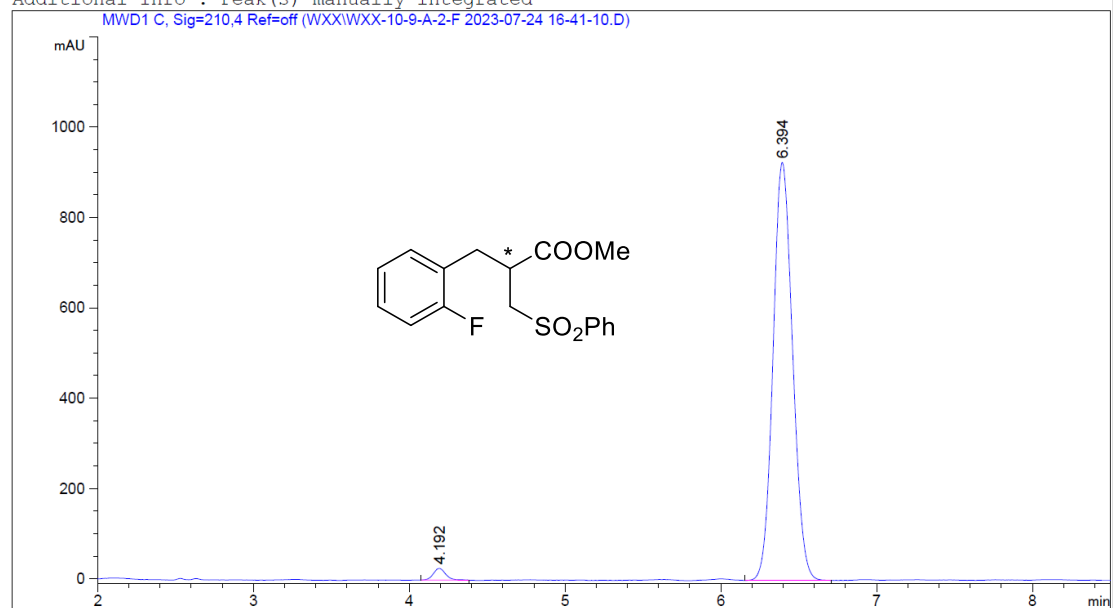

| Peak # | RetTime [min] | Type | Width [min] | Area [mAU*s] | Height [mAU] | Area %  |
|--------|---------------|------|-------------|--------------|--------------|---------|
| 1      | 4.192         | BV R | 0.0837      | 145.16386    | 25.96060     | 1.7685  |
| 2      | 6.394         | BB   | 0.1342      | 8063.11670   | 925.14130    | 98.2315 |

Totals : 8208.28056 951.10190

# Methyl 2-(2-bromobenzyl)-3-(phenylsulfonyl)propanoate (**2p**)

Additional Info : Peak(s) manually integrated

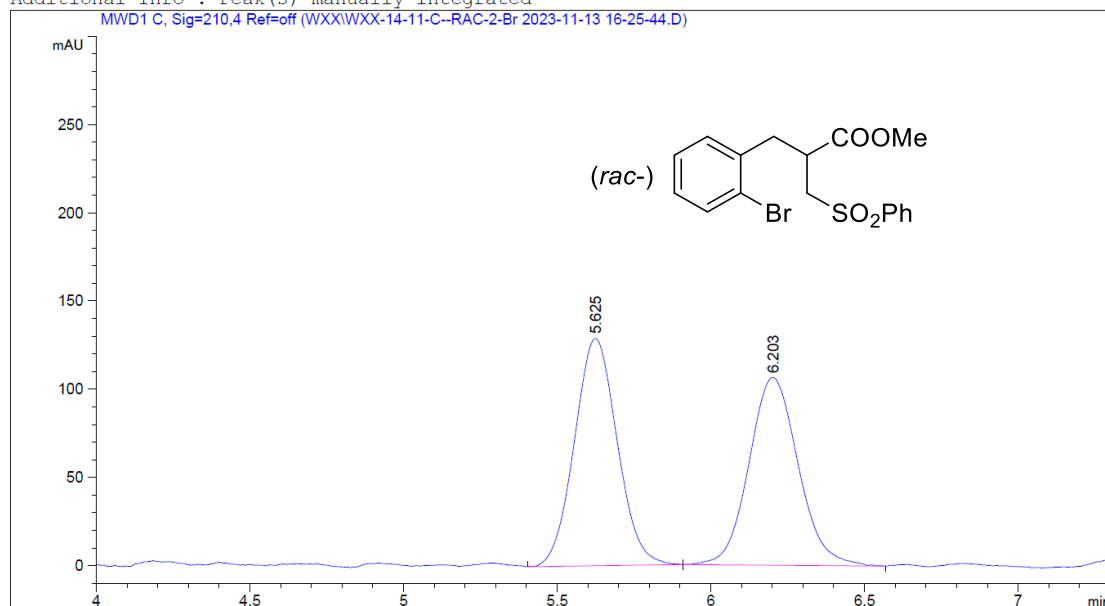

Additional Info : Peak(s) manually integrated

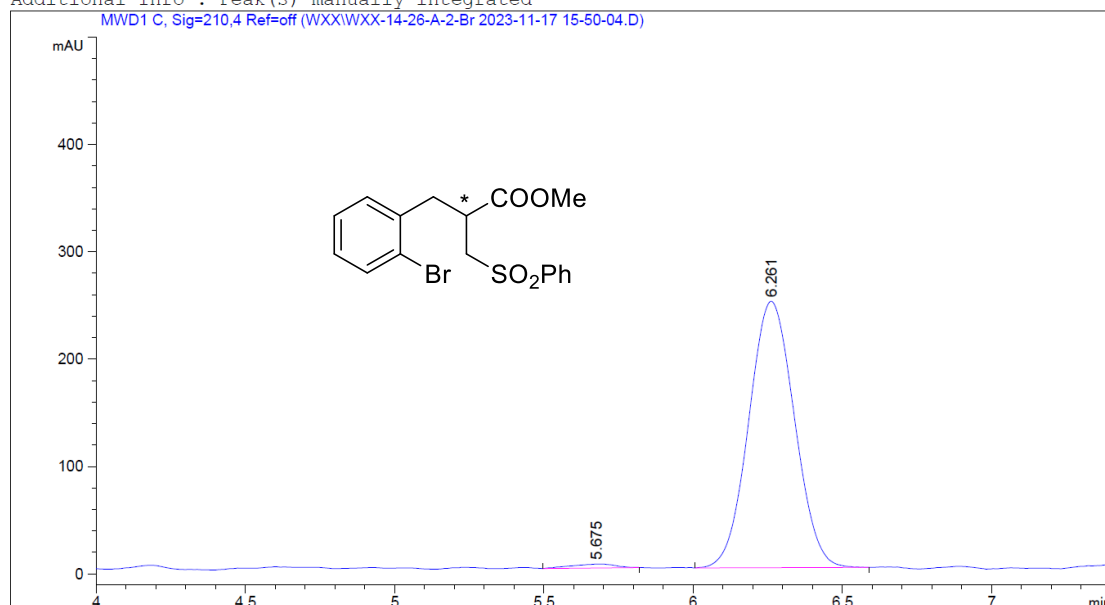

| Peak # | RetTime [min] | Type | Width [min] | Area [mAU*s] | Height [mAU] | Area %  |
|--------|---------------|------|-------------|--------------|--------------|---------|
| 1      | 5.675         | BV R | 0.1218      | 37.43353     | 3.73799      | 1.3985  |
| 2      | 6.261         | BB   | 0.1621      | 2639.31396   | 248.17355    | 98.6015 |

Totals : 2676.74749 251.91155



# Methyl 2-(3,4-dichlorobenzyl)-3-(phenylsulfonyl)propanoate (**2q**)

Additional Info : Peak(s) manually integrated

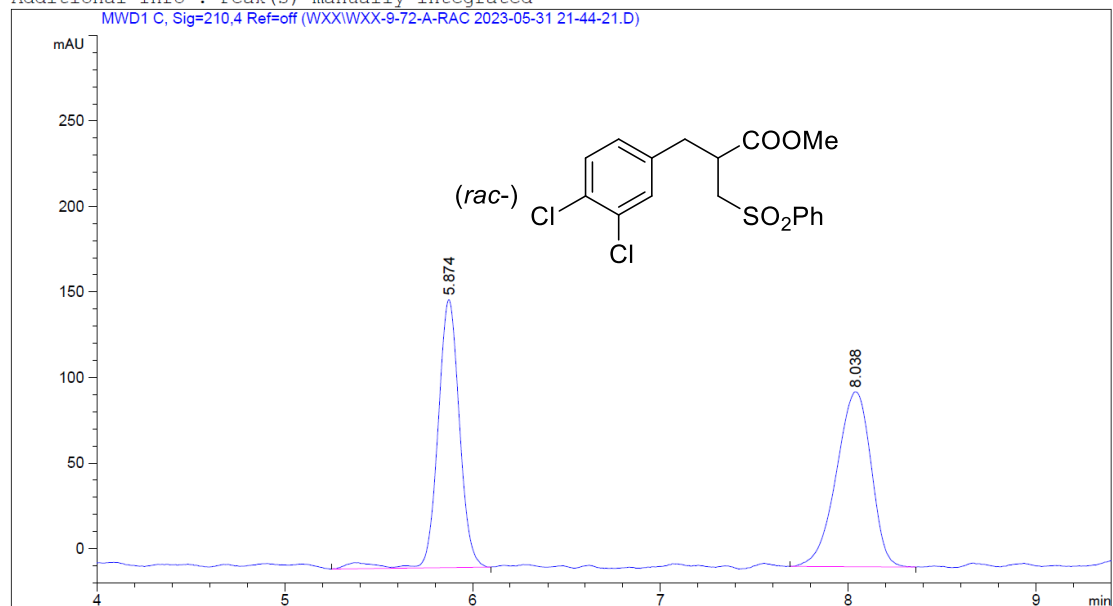

Additional Info : Peak(s) manually integrated

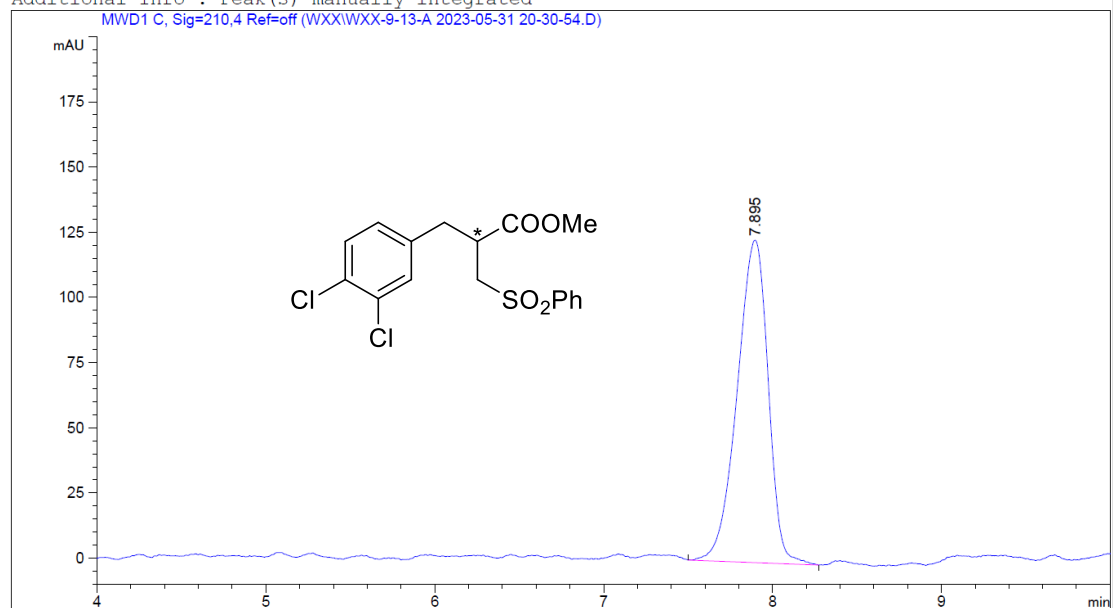

| Peak # | RetTime [min] | Type | Width [min] | Area [mAU*s] | Height [mAU] | Area %   |
|--------|---------------|------|-------------|--------------|--------------|----------|
| 1      | 7.895         | BB   | 0.1837      | 1576.19458   | 123.68316    | 100.0000 |

Totals : 1576.19458 123.68316

# Methyl 3-(naphthalen-2-yl)-2-((phenylsulfonyl)methyl)propanoate (**2r**)

Additional Info : Peak(s) manually integrated

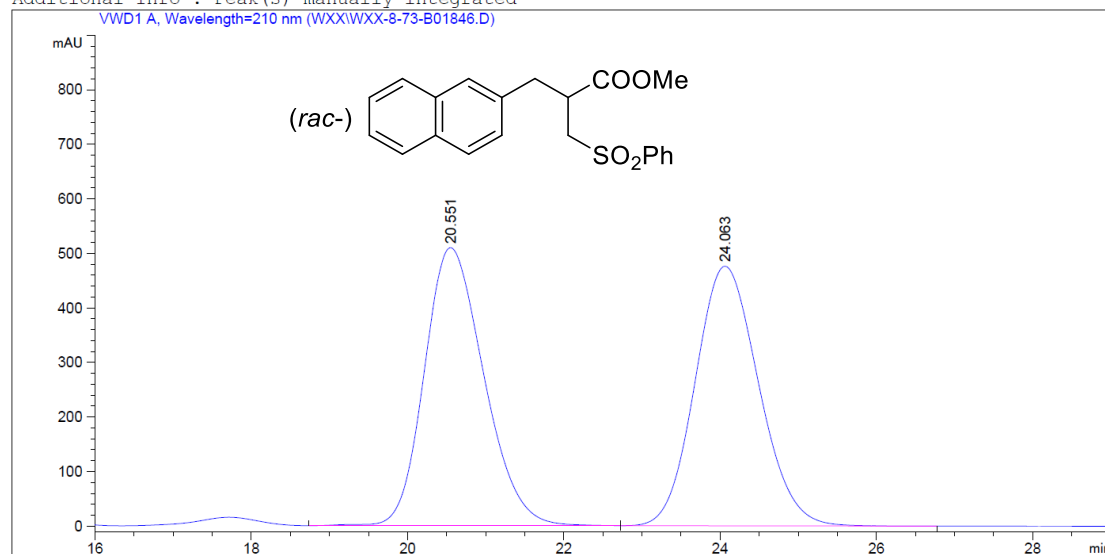

Additional Info : Peak(s) manually integrated

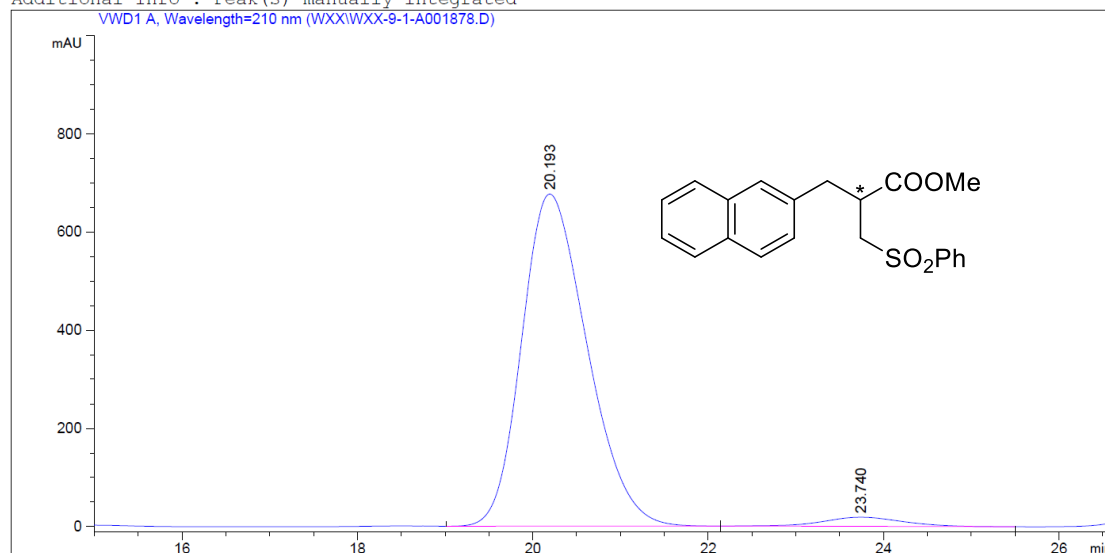

| Peak # | RetTime [min] | Type | Width [min] | Area [mAU*s] | Height [mAU] | Area %  |
|--------|---------------|------|-------------|--------------|--------------|---------|
| 1      | 20.193        | BB   | 0.8036      | 3.50285e4    | 675.88385    | 96.7580 |
| 2      | 23.740        | BB   | 0.9520      | 1173.68811   | 18.55353     | 3.2420  |

Totals : 3.62022e4 694.43738

## Methyl 3-(phenylsulfonyl)-2-(thiophen-2-ylmethyl)propanoate (2s)

Additional Info : Peak(s) manually integrated

VVD1 A, Wavelength=210 nm (WXX\WXX-9-15-A02056.D)

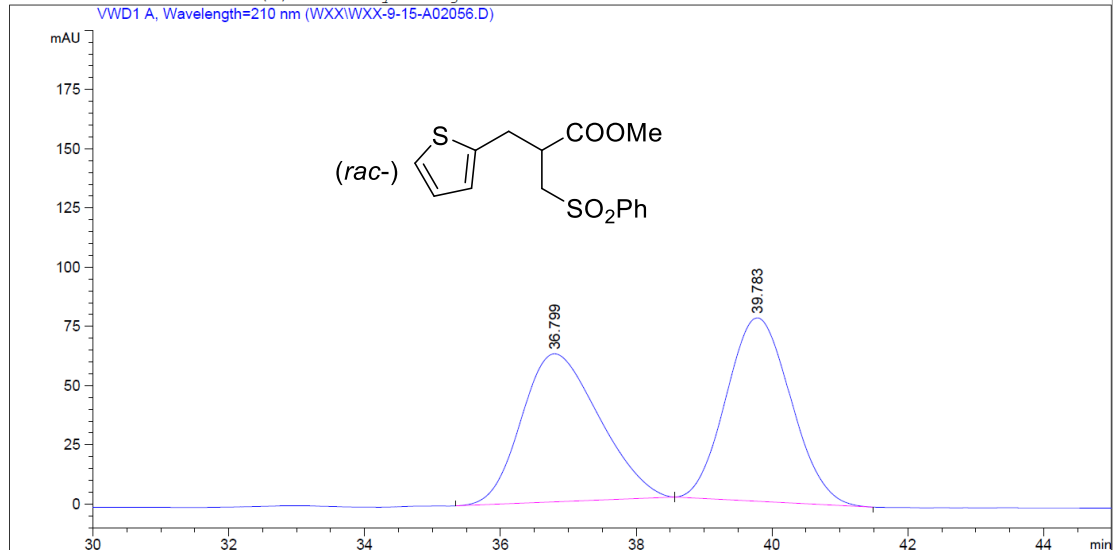

Additional Info : Peak(s) manually integrated

VVD1 A, Wavelength=210 nm (WXX\WXX-9-13-B02057.D)

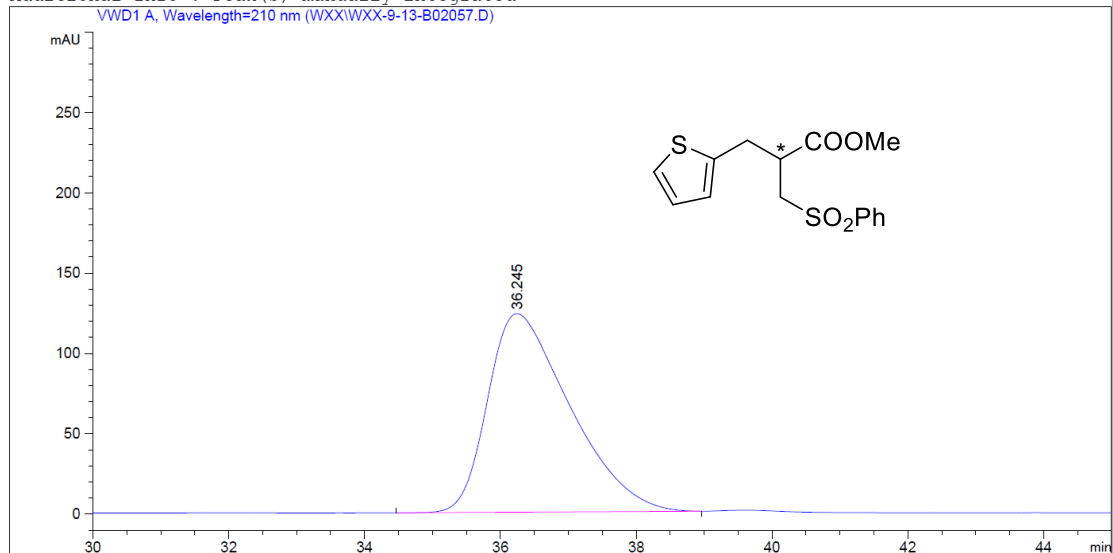

| Peak # | RetTime [min] | Type | Width [min] | Area [mAU*s] | Height [mAU] | Area %   |
|--------|---------------|------|-------------|--------------|--------------|----------|
| 1      | 36.245        | BB   | 1.2445      | 1.03675e4    | 123.48174    | 100.0000 |

Totals : 1.03675e4 123.48174

# Methyl 3-(furan-2-yl)-2-((phenylsulfonyl)methyl)propanoate (**2t**)

Additional Info : Peak(s) manually integrated

MWD1 C, Sig=210,4 Ref=off (WXXIWXX-9-15-B-RAC 2023-05-10 13-54-22.D)

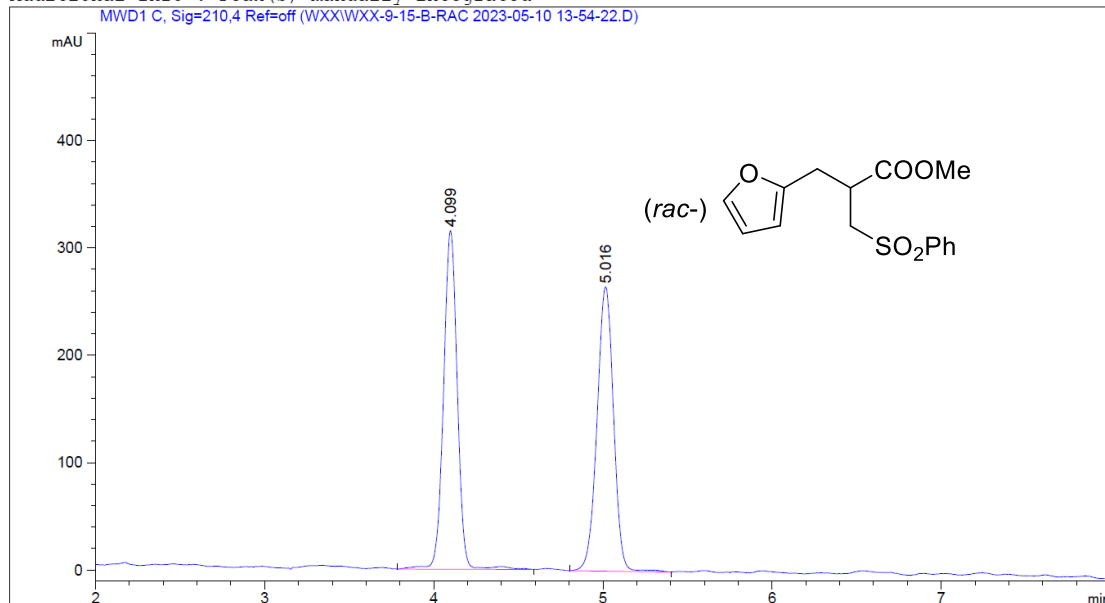

Additional Info : Peak(s) manually integrated

MWD1 C, Sig=210,4 Ref=off (WXXIWXX-9-31-A 2023-05-10 14-09-18.D)

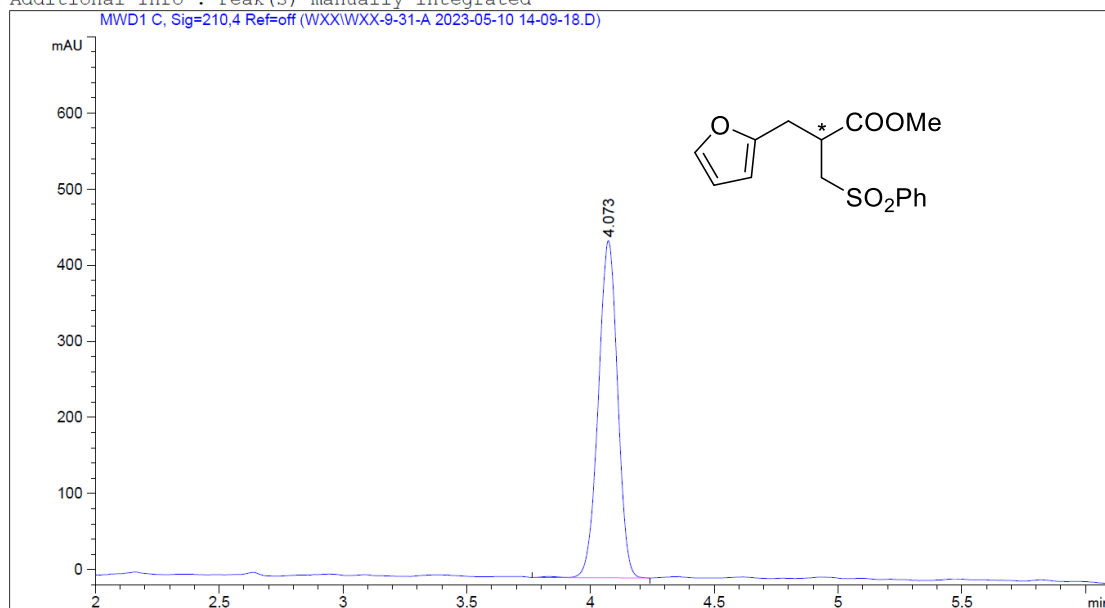

| Peak # | RetTime [min] | Type | Width [min] | Area [mAU*s] | Height [mAU] | Area %   |
|--------|---------------|------|-------------|--------------|--------------|----------|
| 1      | 4.073         | VB R | 0.0833      | 2399.35059   | 442.17075    | 100.0000 |

Totals : 2399.35059 442.17075

## Methyl 3-(phenylsulfonyl)-2-(pyridin-3-ylmethyl)propanoate (**2u**)

Additional Info : Peak(s) manually integrated

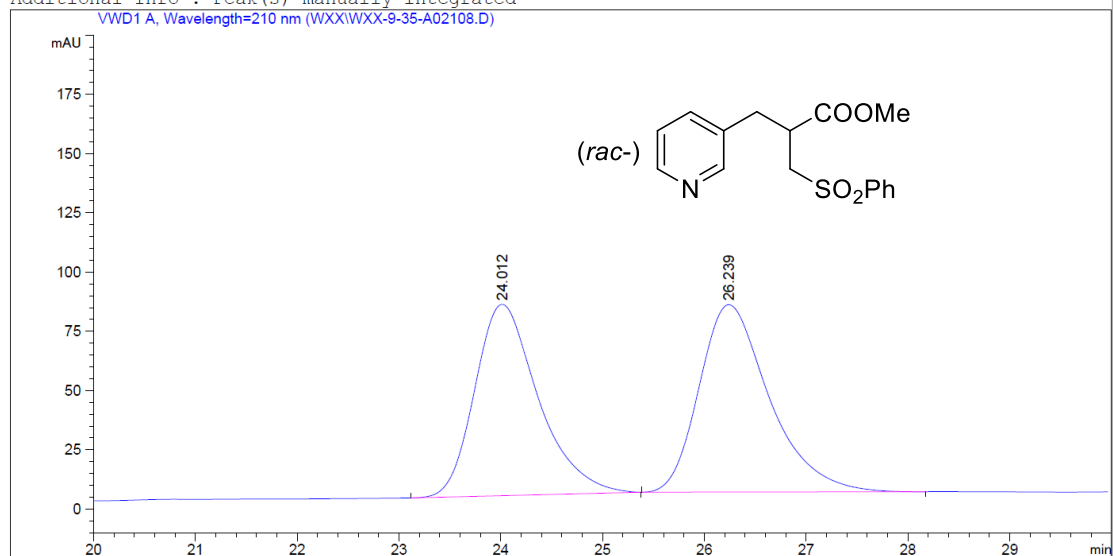

Additional Info : Peak(s) manually integrated

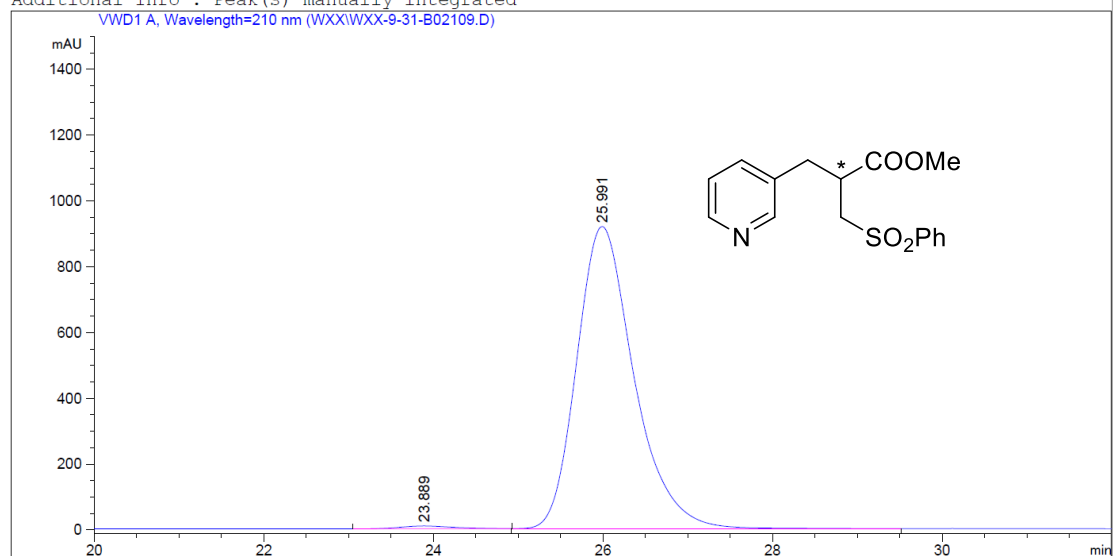

| Peak # | RetTime [min] | Type | Width [min] | Area [mAU*s] | Height [mAU] | Area %  |
|--------|---------------|------|-------------|--------------|--------------|---------|
| 1      | 23.889        | BB   | 0.6373      | 350.81351    | 8.27950      | 0.8089  |
| 2      | 25.991        | BB   | 0.7139      | 4.30162e4    | 917.66730    | 99.1911 |

Totals : 4.33670e4 925.94680

## Methyl 4-methyl-2-((phenylsulfonyl)methyl)pentanoate (**2v**)

Additional Info : Peak(s) manually integrated

MWD1 C, Sig=210,4 Ref=off (WXXIWXX-15-44-B-RAC-iPr 2024-02-02 17-54-45.D)

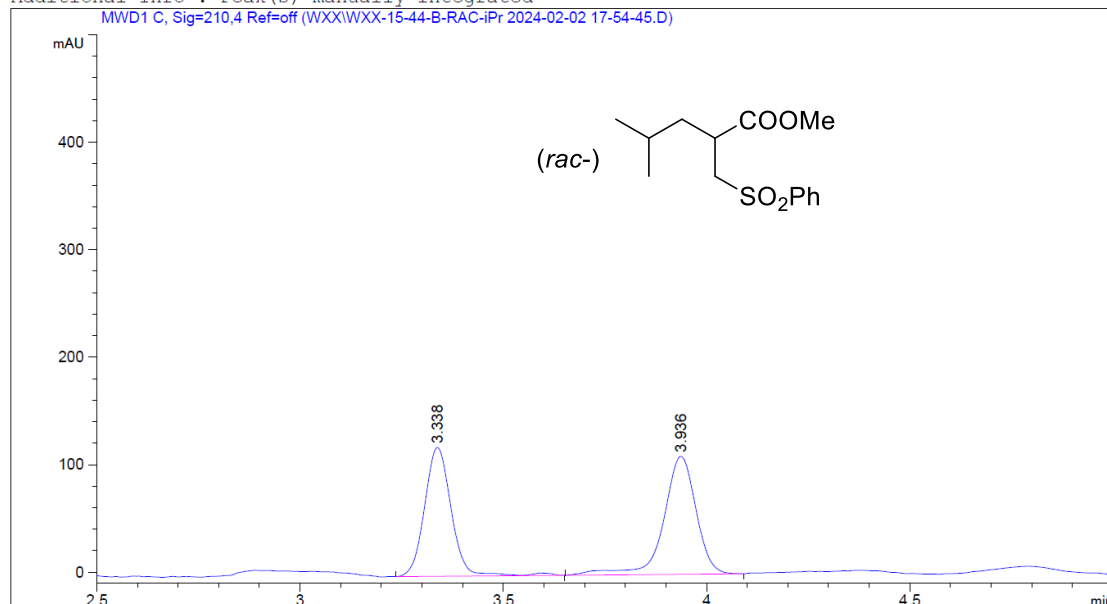

Additional Info : Peak(s) manually integrated

MWD1 C, Sig=210,4 Ref=off (WXXIWXX-15-50-A-iPr 2024-02-02 18-03-44.D)

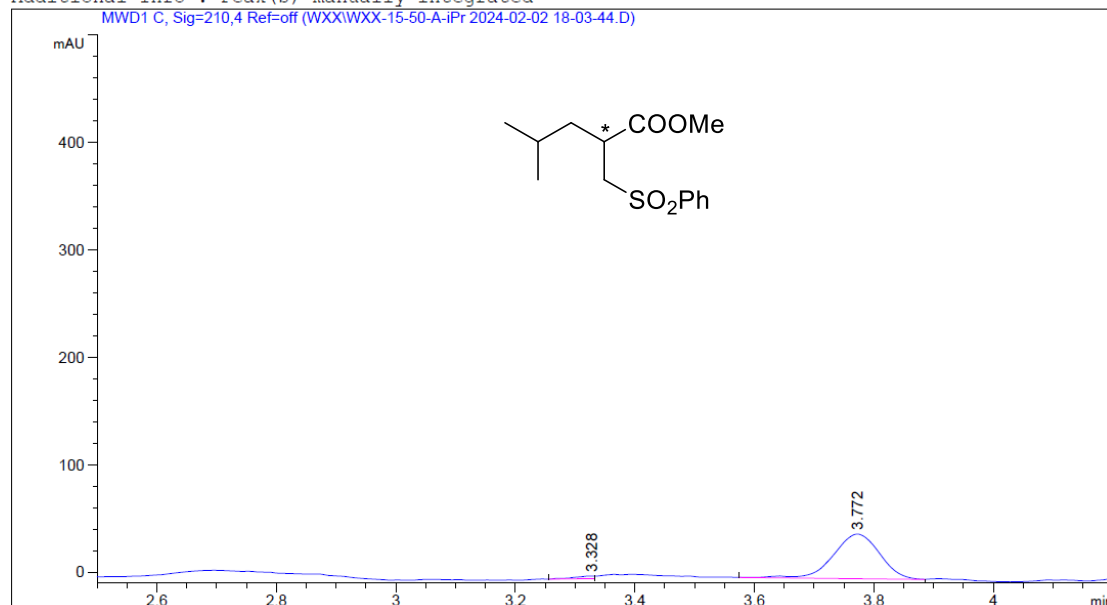

| Peak # | RetTime [min] | Type | Width [min] | Area [mAU*s] | Height [mAU] | Area %  |
|--------|---------------|------|-------------|--------------|--------------|---------|
| 1      | 3.328         | BV   | 0.0340      | 5.82434      | 2.34460      | 2.5450  |
| 2      | 3.772         | VB R | 0.0821      | 223.02681    | 41.55473     | 97.4550 |

Totals : 228.85115 43.89933

# Methyl 2-benzyl-3-tosylpropanoate (**4a**)

Additional Info : Peak(s) manually integrated  
VWD1 A, Wavelength=210 nm (WXX\WXX-8-54-B01703.D)

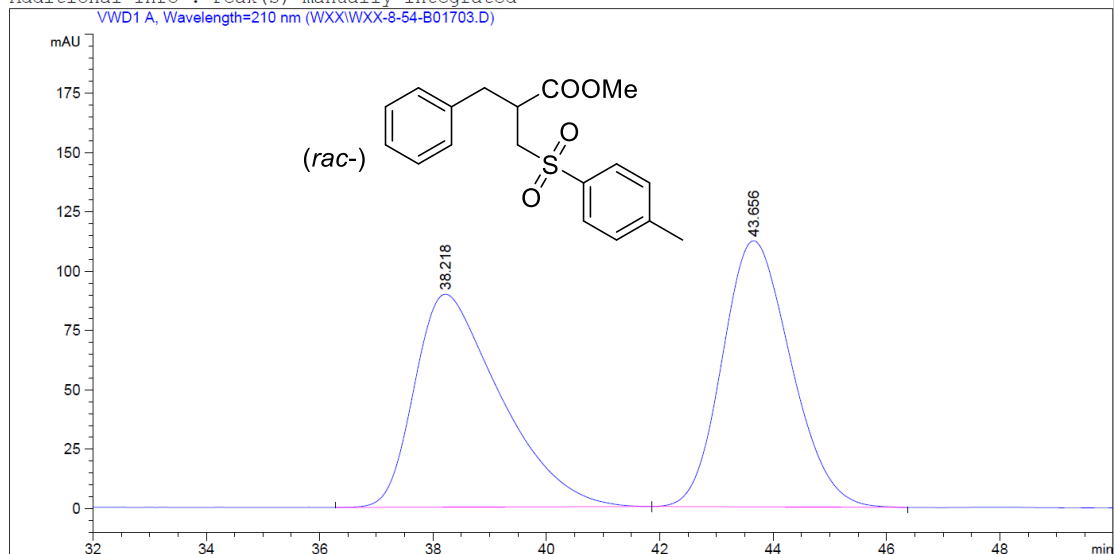

Additional Info : Peak(s) manually integrated  
VWD1 A, Wavelength=210 nm (WXX\WXX-8-53001705.D)

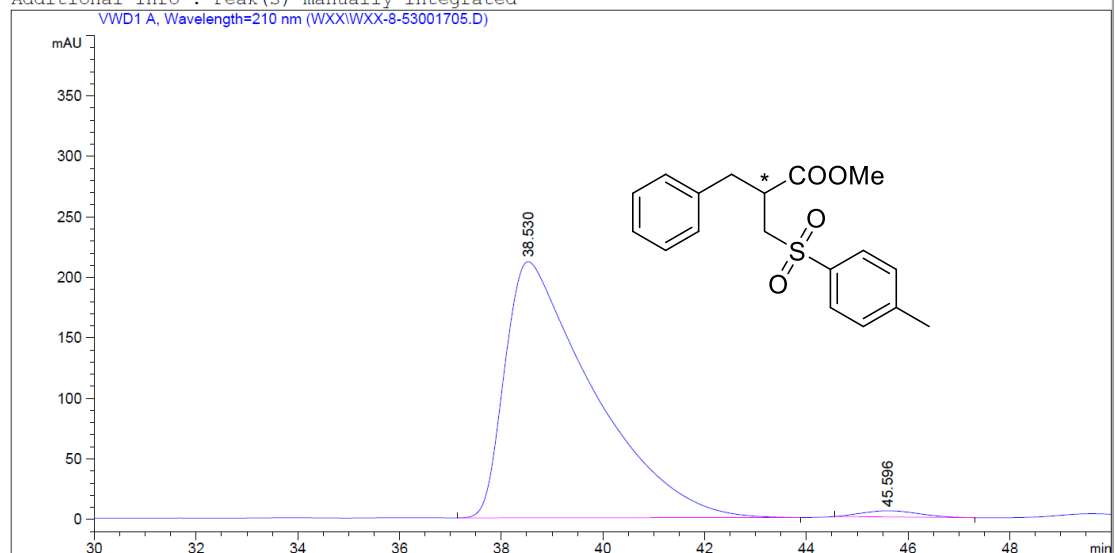

| Peak # | RetTime [min] | Type | Width [min] | Area [mAU*s] | Height [mAU] | Area %  |
|--------|---------------|------|-------------|--------------|--------------|---------|
| 1      | 38.530        | BB   | 1.6240      | 2.53826e4    | 211.66817    | 98.4703 |
| 2      | 45.596        | BB   | 1.0187      | 394.31860    | 5.12436      | 1.5297  |

Totals : 2.57769e4 216.79252

# Methyl 2-benzyl-3-((4-fluorophenyl)sulfonyl)propanoate (**4b**)

Additional Info : Peak(s) manually integrated

MWD1 C, Sig=210,4 Ref=off (WXX\WXX-9-72-B-RAC 2023-05-31 22-33-49.D)

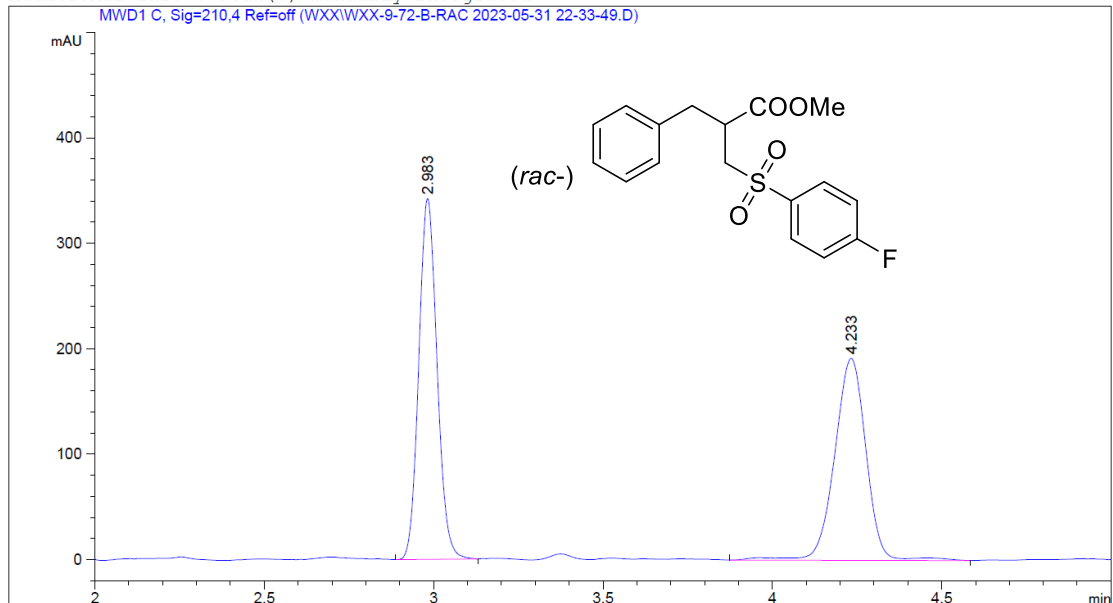

Additional Info : Peak(s) manually integrated

MWD1 C, Sig=210,4 Ref=off (WXX\WXX-8-58-B 2023-05-31 21-15-02.D)

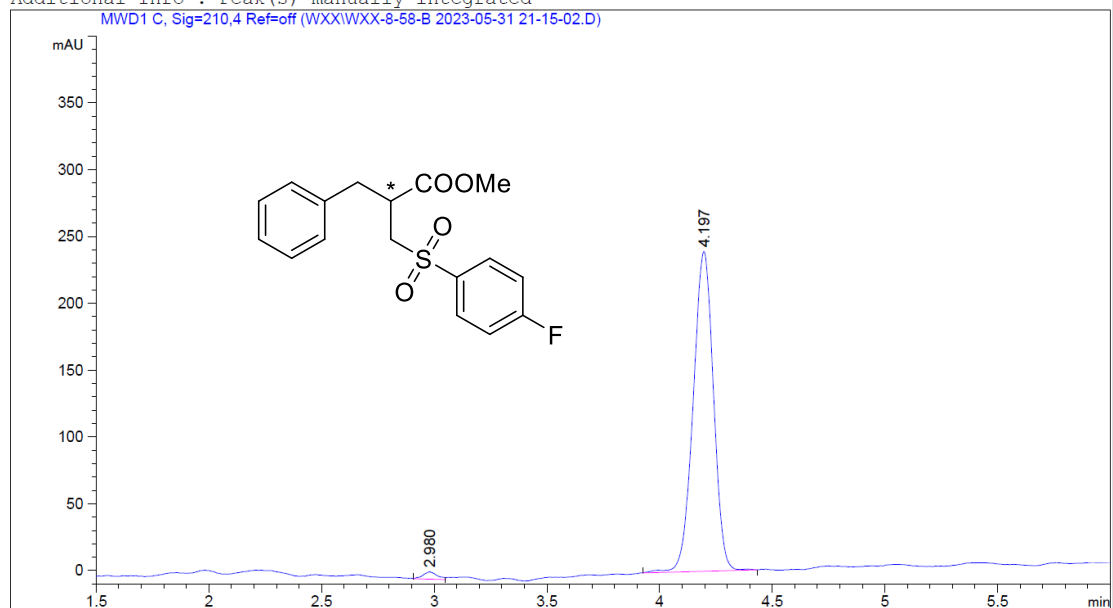

| Peak # | RetTime [min] | Type | Width [min] | Area [mAU*s] | Height [mAU] | Area %  |
|--------|---------------|------|-------------|--------------|--------------|---------|
| 1      | 2.980         | BV   | 0.0549      | 23.75104     | 5.49862      | 1.5569  |
| 2      | 4.197         | VV R | 0.0987      | 1501.80298   | 239.24866    | 98.4431 |

Totals : 1525.55401 244.74728



# Methyl 2-benzyl-3-((4-chlorophenyl)sulfonyl)propanoate (**4c**)

Additional Info : Peak(s) manually integrated

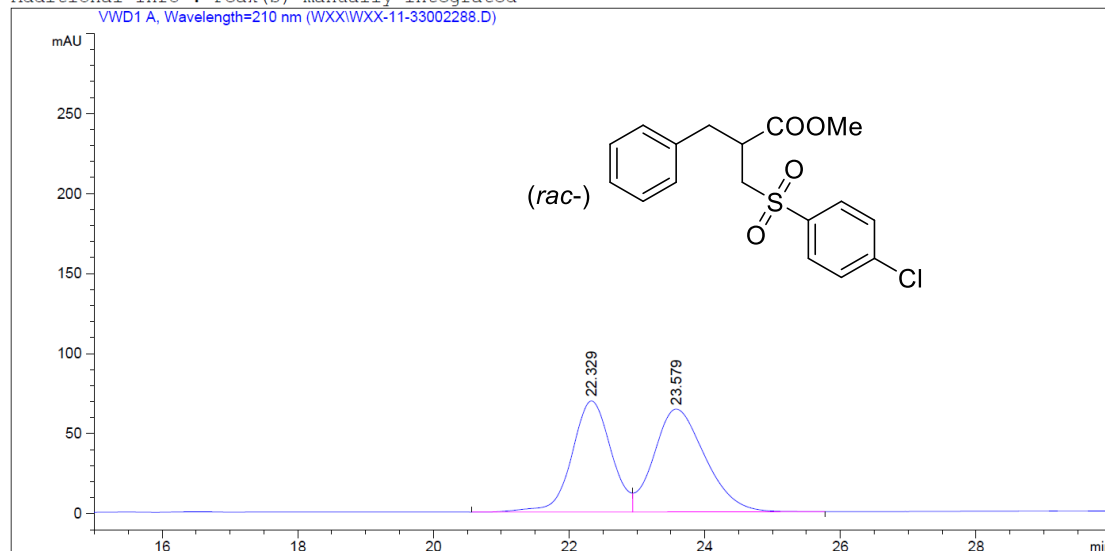

Additional Info : Peak(s) manually integrated

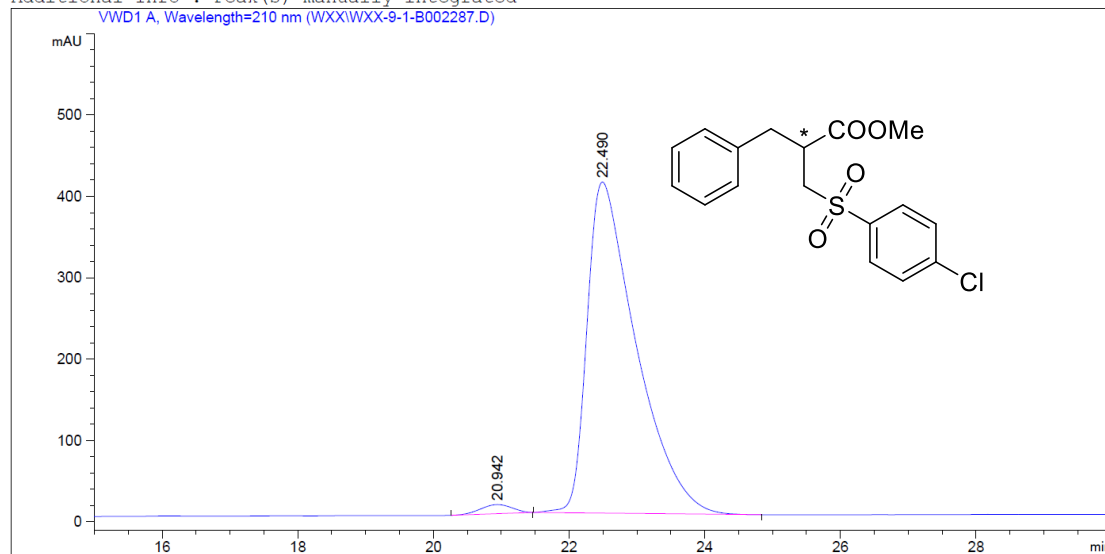

| Peak # | RetTime [min] | Type | Width [min] | Area [mAU*s] | Height [mAU] | Area %  |
|--------|---------------|------|-------------|--------------|--------------|---------|
| 1      | 20.942        | BB   | 0.5228      | 360.84949    | 11.17367     | 1.7310  |
| 2      | 22.490        | BB   | 0.7354      | 2.04857e4    | 406.85208    | 98.2690 |

Totals : 2.08466e4 418.02575

## Methyl 2-benzyl-3-(methylsulfonyl)propanoate (**4d**)

Additional Info : Peak(s) manually integrated

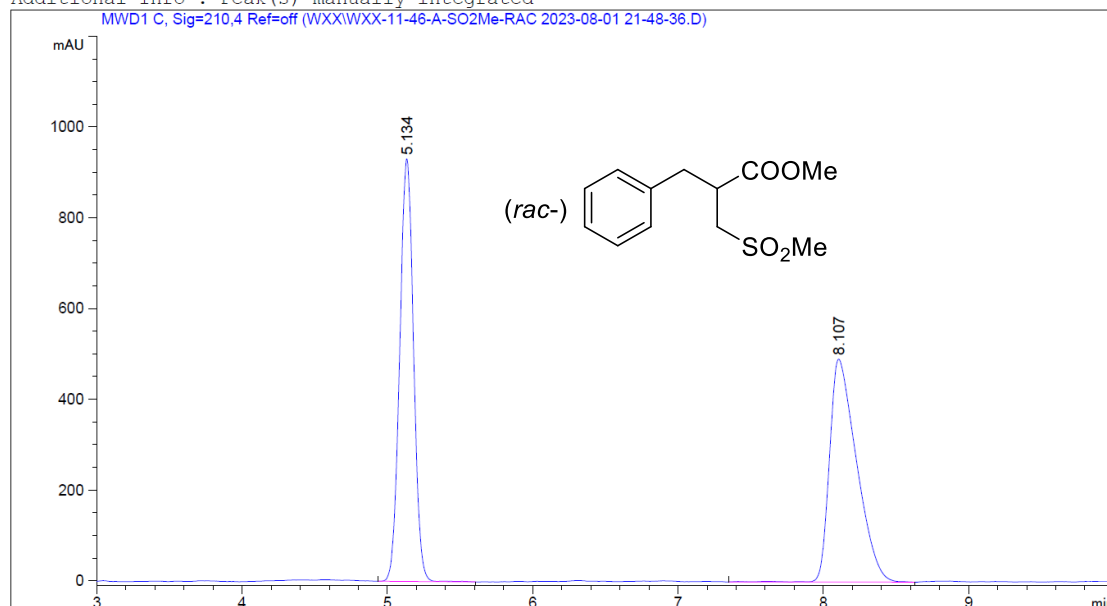

Additional Info : Peak(s) manually integrated

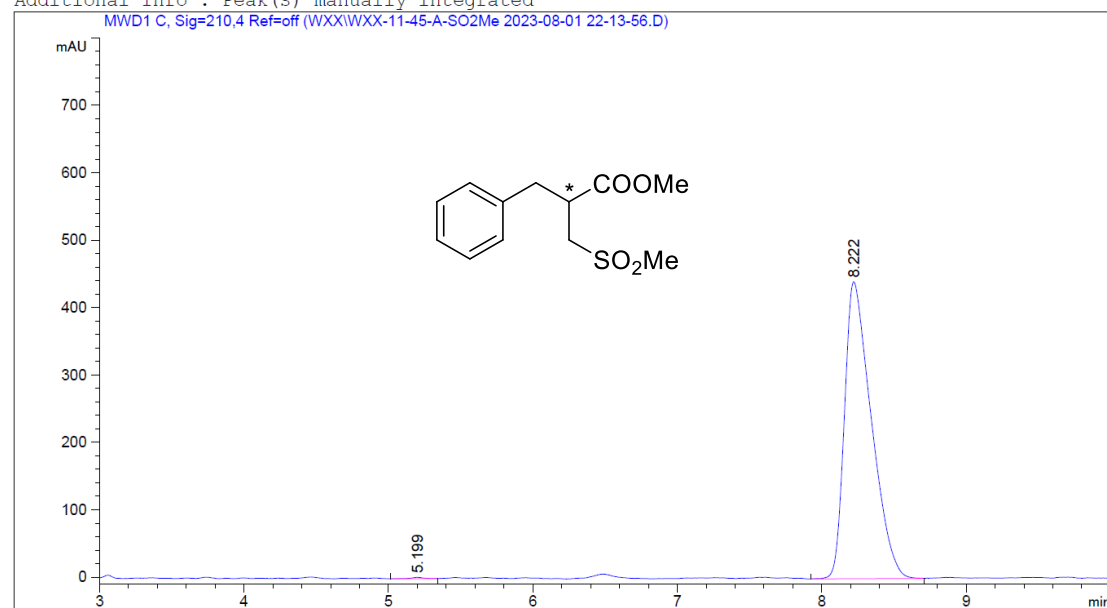

| Peak # | RetTime [min] | Type | Width [min] | Area [mAU*s] | Height [mAU] | Area %  |
|--------|---------------|------|-------------|--------------|--------------|---------|
| 1      | 5.199         | BB   | 0.0805      | 11.56411     | 1.96838      | 0.2034  |
| 2      | 8.222         | BB   | 0.1923      | 5673.06201   | 440.28922    | 99.7966 |

Totals : 5684.62612 442.25760

# Methyl (Z)-2-((*tert*-butylsulfonyl)methyl)-3-phenylacrylate (**4e**)

Additional Info : Peak(s) manually integrated

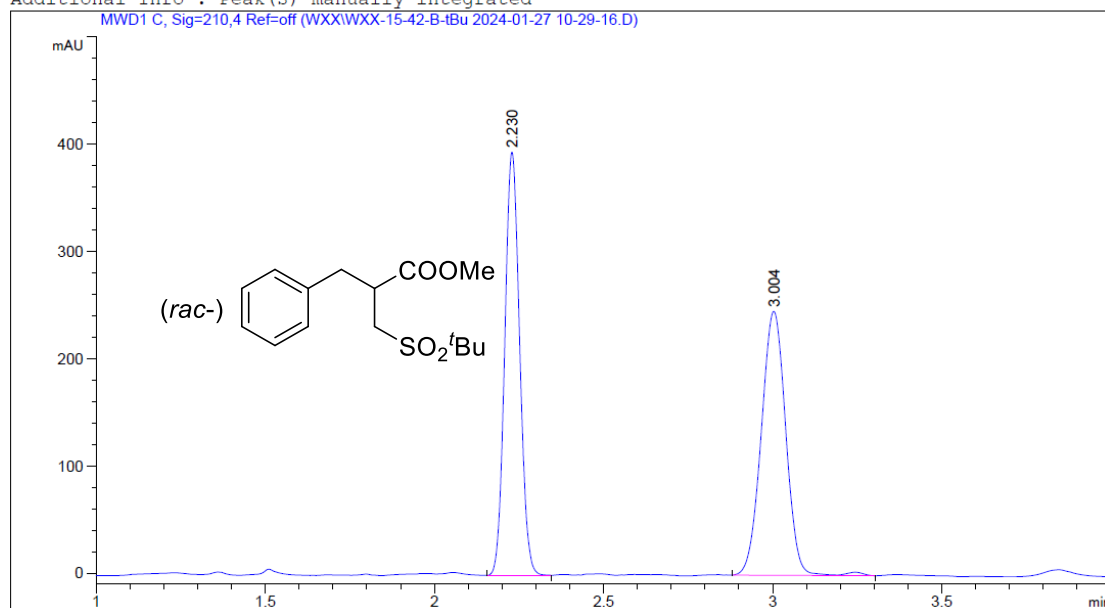

Additional Info : Peak(s) manually integrated

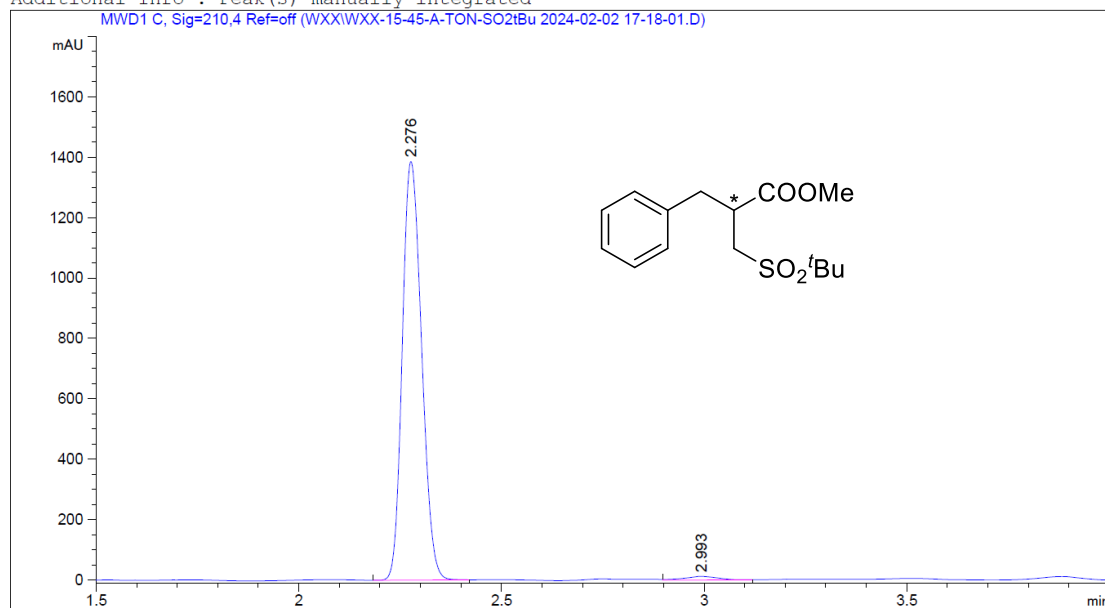

| Peak # | RetTime [min] | Type | Width [min] | Area [mAU*s] | Height [mAU] | Area %  |
|--------|---------------|------|-------------|--------------|--------------|---------|
| 1      | 2.276         | BB   | 0.0520      | 4580.00049   | 1386.21118   | 98.5050 |
| 2      | 2.993         | VV R | 0.0836      | 69.50828     | 12.26748     | 1.4950  |

Totals : 4649.50877 1398.47866

# Methyl 2-benzyl-3-phenoxypropanoate (**4f**)

Additional Info : Peak(s) manually integrated

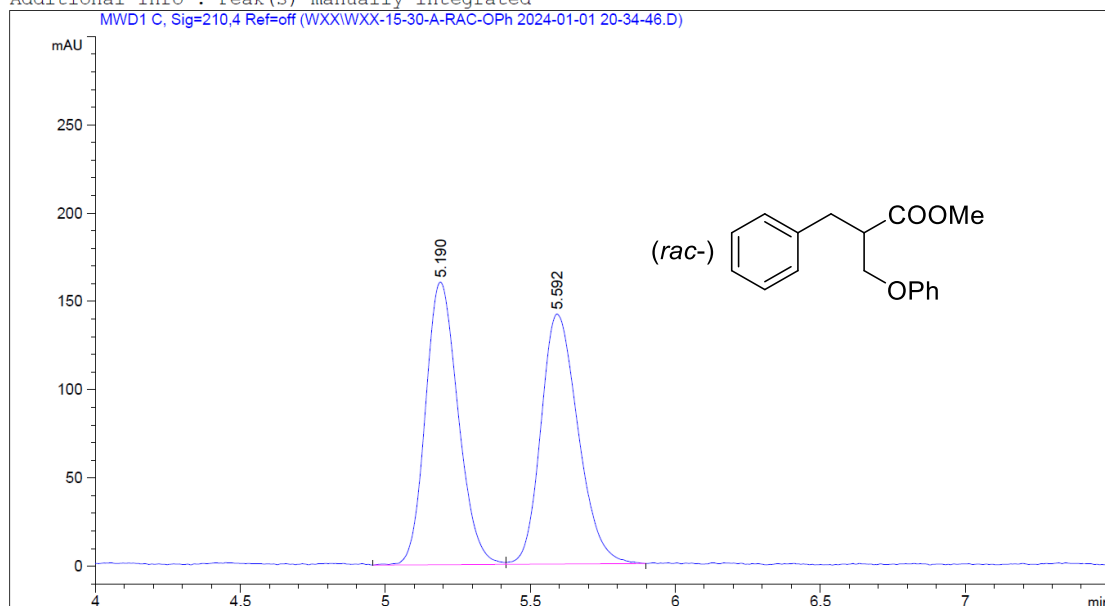

Additional Info : Peak(s) manually integrated

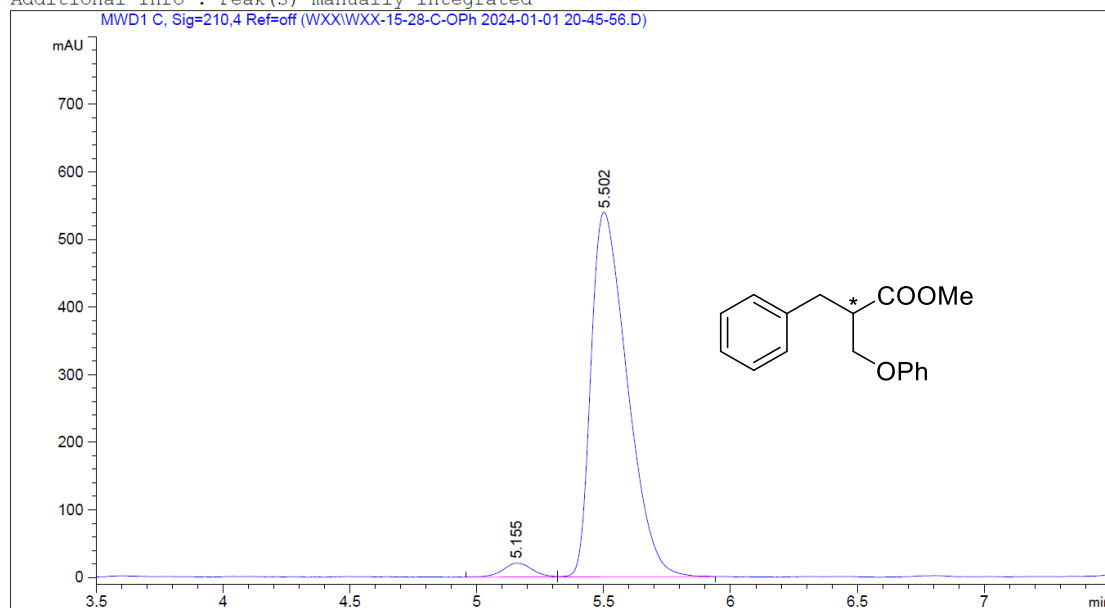

| Peak # | RetTime [min] | Type | Width [min] | Area [mAU*s] | Height [mAU] | Area %  |
|--------|---------------|------|-------------|--------------|--------------|---------|
| 1      | 5.155         | VV R | 0.1034      | 165.47737    | 20.56747     | 3.0048  |
| 2      | 5.502         | VV R | 0.1550      | 5341.68945   | 539.59766    | 96.9952 |

Totals : 5507.16682 560.16512

# Ethyl 2-benzyl-3-(phenylsulfonyl)propanoate (**4g**)

Additional Info : Peak(s) manually integrated

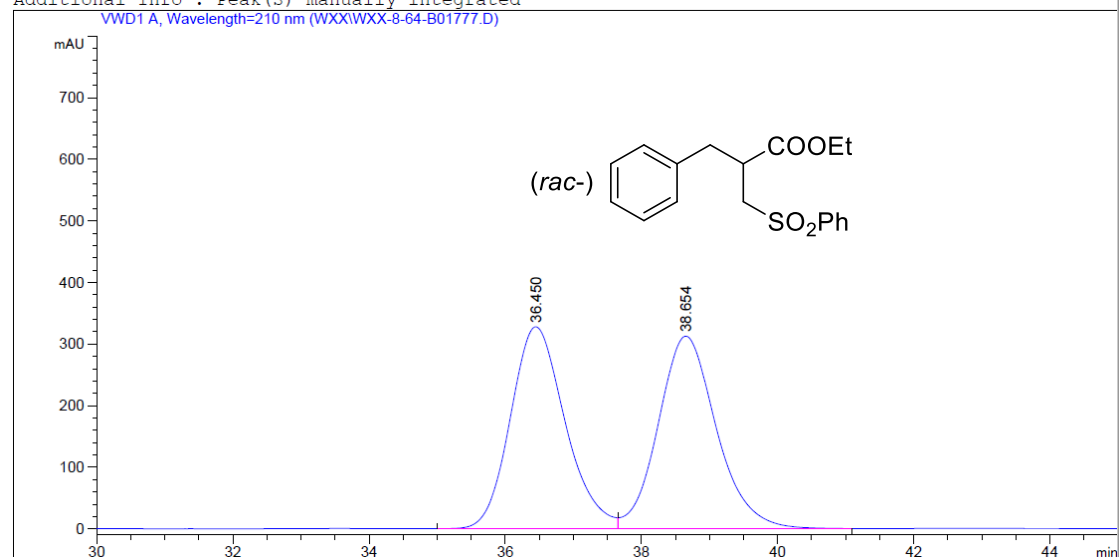

Additional Info : Peak(s) manually integrated

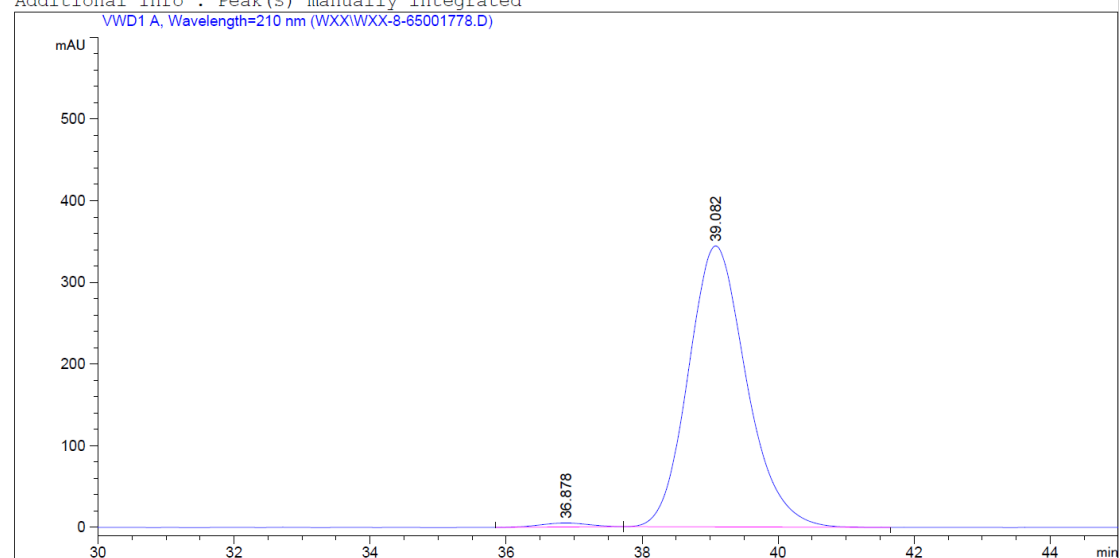

| Peak # | RetTime [min] | Type | Width [min] | Area [mAU*s] | Height [mAU] | Area %  |
|--------|---------------|------|-------------|--------------|--------------|---------|
| 1      | 36.878        | BB   | 0.7324      | 238.74438    | 4.93493      | 1.1555  |
| 2      | 39.082        | BB   | 0.9134      | 2.04222e4    | 344.09827    | 98.8445 |

Totals : 2.06610e4 349.03319

# ***Tert*-butyl 2-benzyl-3-(phenylsulfonyl)propanoate (**4h**)**

Additional Info : Peak(s) manually integrated

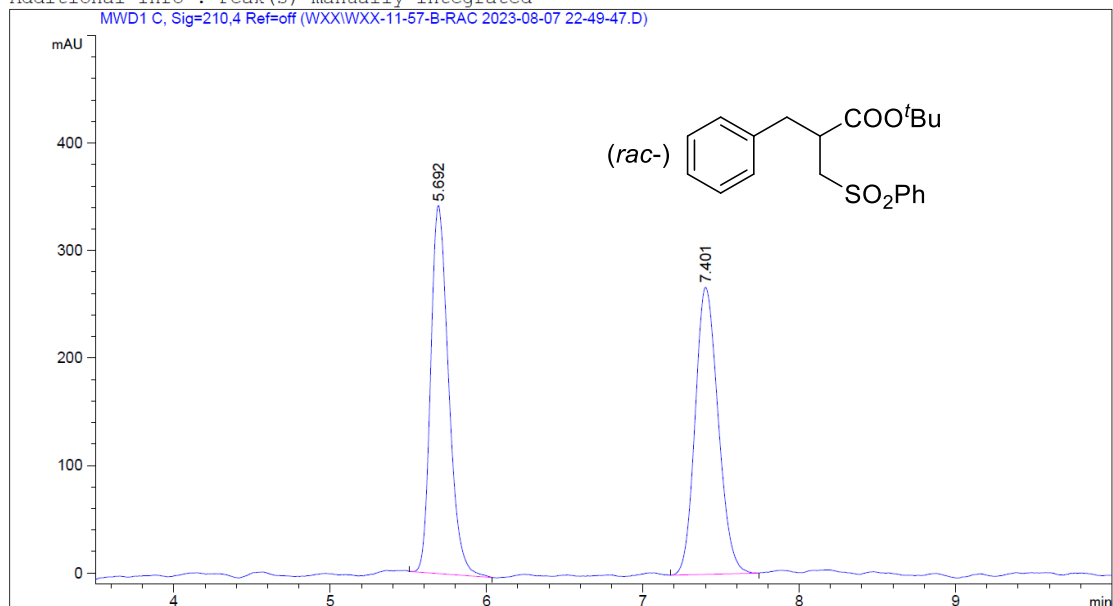

Additional Info : Peak(s) manually integrated

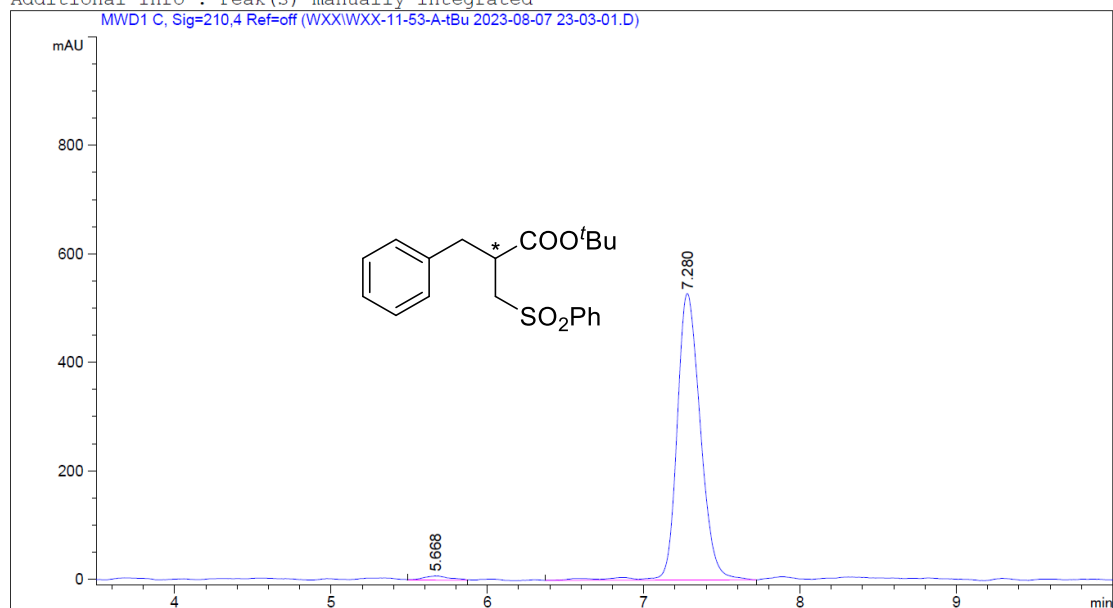

| Peak # | RetTime [min] | Type | Width [min] | Area [mAU*s] | Height [mAU] | Area %  |
|--------|---------------|------|-------------|--------------|--------------|---------|
| 1      | 5.668         | VV   | 0.1441      | 91.61042     | 7.73825      | 1.6402  |
| 2      | 7.280         | VB R | 0.1596      | 5493.68848   | 527.87885    | 98.3598 |

Totals : 5585.29890 535.61709

## 2-Benzyl-3-(phenylsulfonyl)propanoic acid (**4i**)

Additional Info : Peak(s) manually integrated

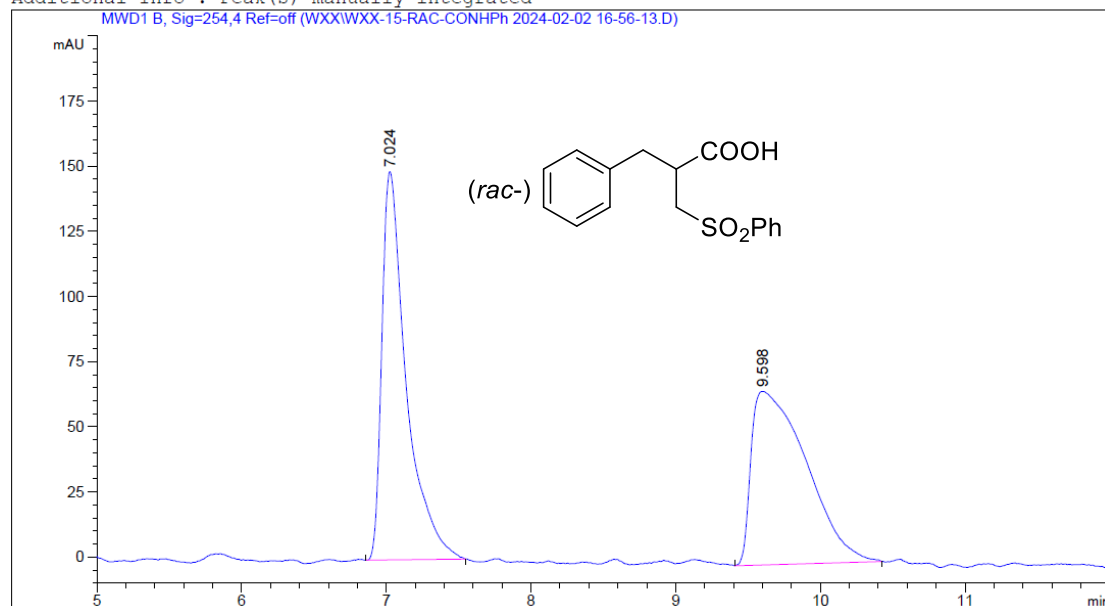

Additional Info : Peak(s) manually integrated

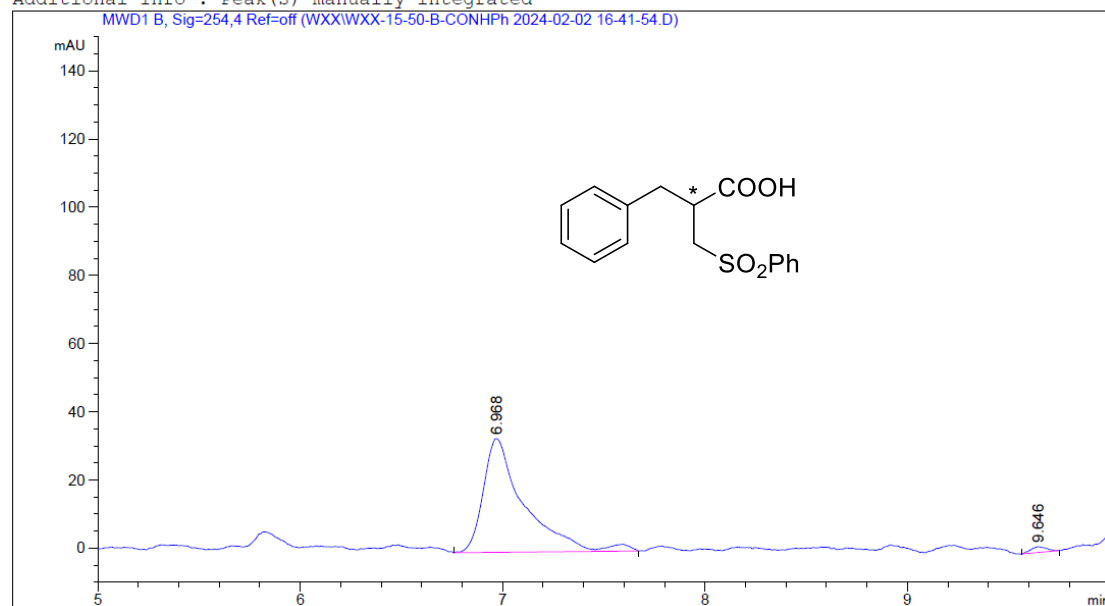

| Peak # | RetTime [min] | Type | Width [min] | Area [mAU*s] | Height [mAU] | Area %  |
|--------|---------------|------|-------------|--------------|--------------|---------|
| 1      | 6.968         | VV R | 0.1885      | 469.07953    | 33.33142     | 98.0955 |
| 2      | 9.646         | BV R | 0.0657      | 9.10690      | 1.73700      | 1.9045  |

Totals : 478.18643 35.06842

## 2-Benzyl-*N*-phenyl-3-(phenylsulfonyl)propenamide (**4j**)

Additional Info : Peak(s) manually integrated

MWD1 B, Sig=254,4 Ref=off (WXX\WXX-9-47-RAC-CONHPh 2023-11-06 20-59-04.D)

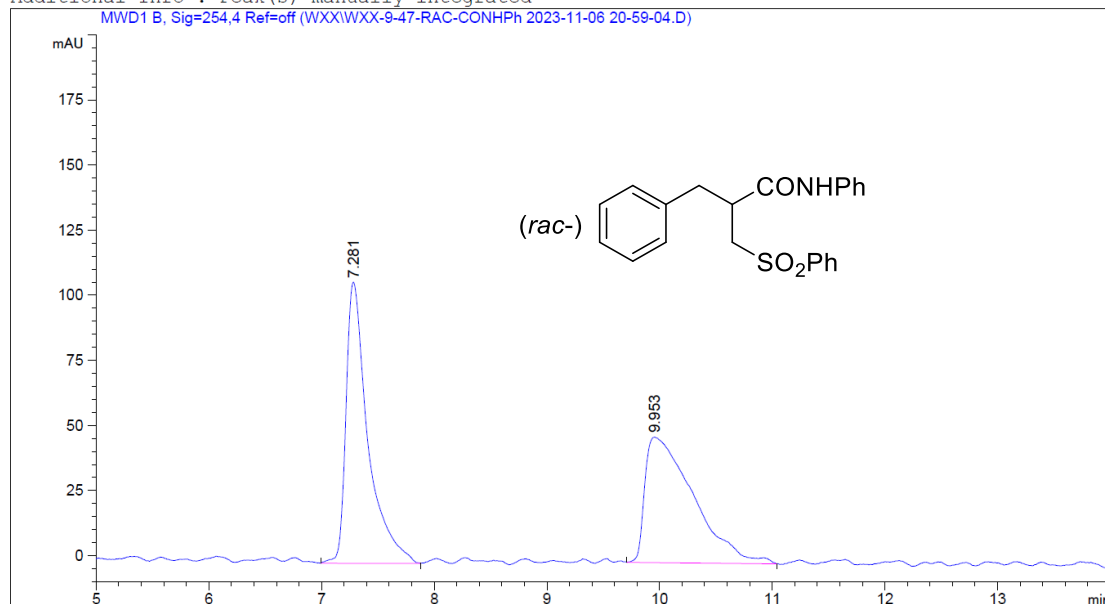

Additional Info : Peak(s) manually integrated

MWD1 B, Sig=254,4 Ref=off (WXX\WXX-14-4-A-CONHPh 2023-11-06 20-21-43.D)

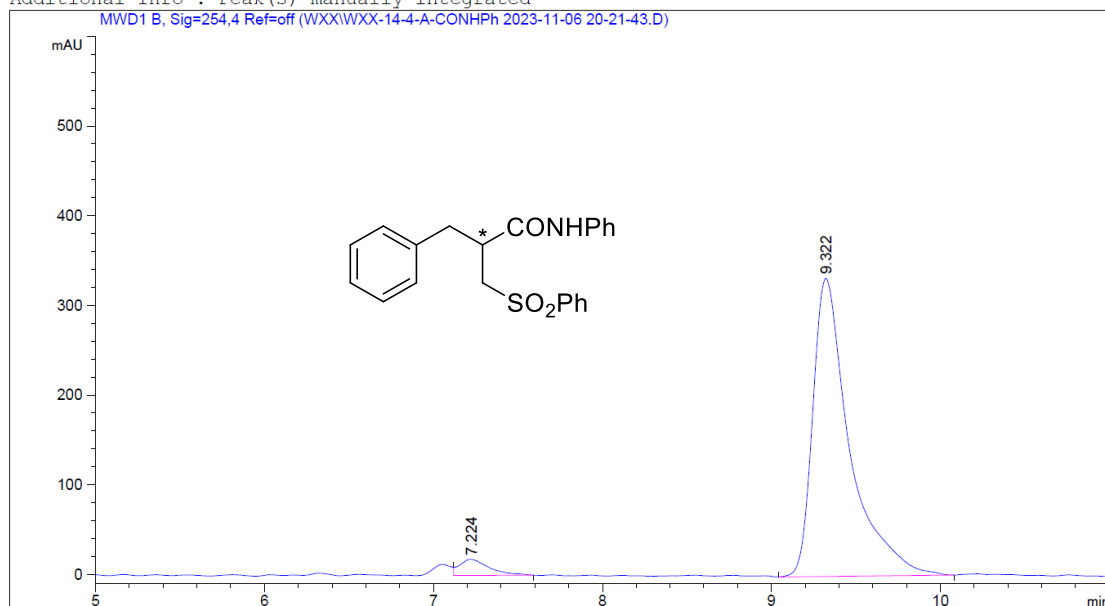

| Peak # | RetTime [min] | Type | Width [min] | Area [mAU*s] | Height [mAU] | Area %  |
|--------|---------------|------|-------------|--------------|--------------|---------|
| 1      | 7.224         | VV R | 0.1574      | 219.90819    | 18.07463     | 4.1970  |
| 2      | 9.322         | BV R | 0.2192      | 5019.76514   | 332.28152    | 95.8030 |

Totals : 5239.67332 350.35616



## 2-Benzyl-*N*-phenyl-3-(phenylsulfonyl)propenamide (**4j'**)

Additional Info : Peak(s) manually integrated

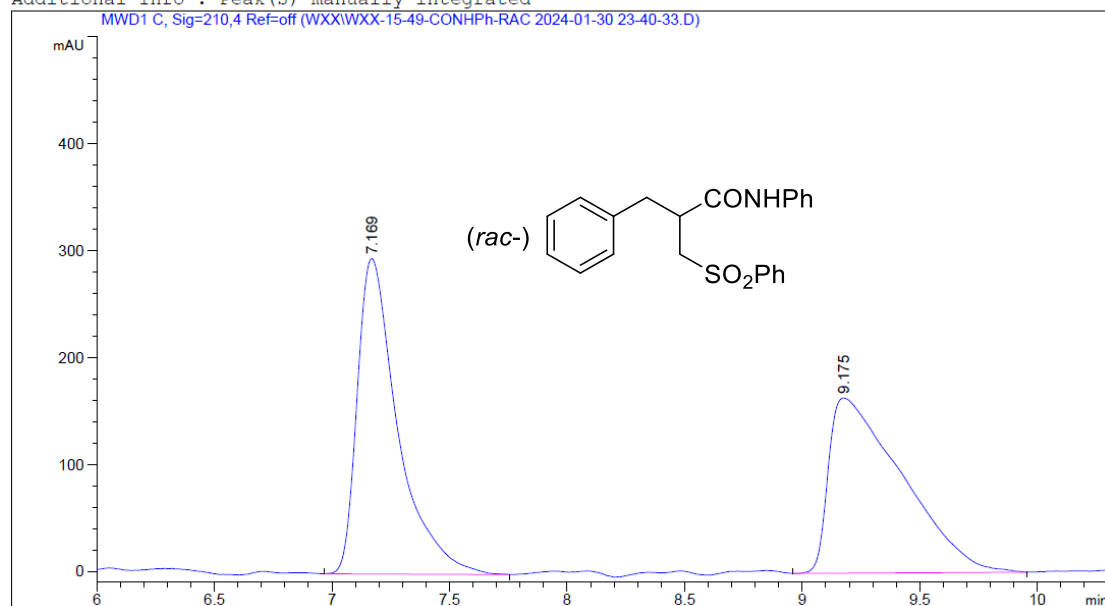

Additional Info : Peak(s) manually integrated

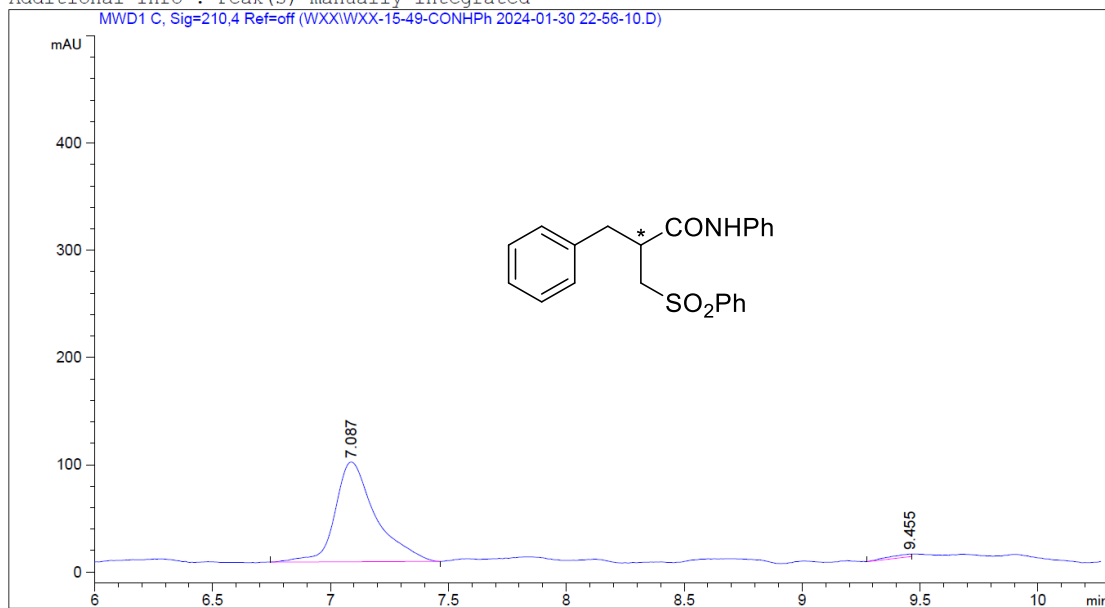

| Peak # | RetTime [min] | Type | Width [min] | Area [mAU*s] | Height [mAU] | Area %  |
|--------|---------------|------|-------------|--------------|--------------|---------|
| 1      | 7.087         | VB R | 0.1707      | 1109.70435   | 92.99034     | 98.3235 |
| 2      | 9.455         | BV   | 0.0912      | 18.92140     | 2.51770      | 1.6765  |

Totals : 1128.62574 95.50804

## Methyl 2-methyl-3-phenylpropanoate (4k)

Additional Info : Peak(s) manually integrated

MWD1 C, Sig=210,4 Ref=off (WXXI WXX-11-41-A-RAC 2023-10-30 22-42-22.D)

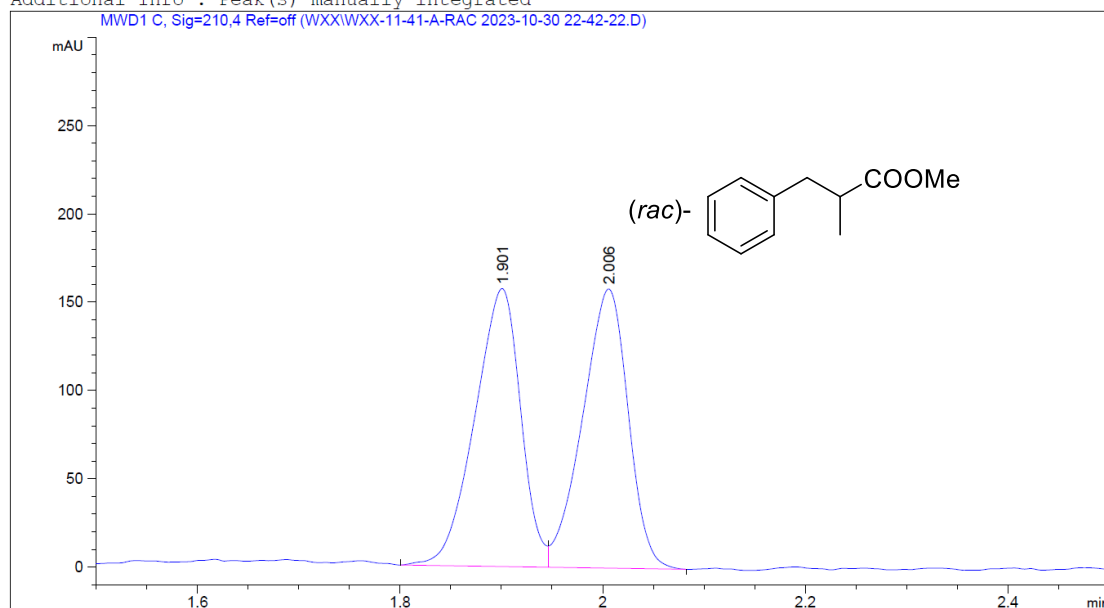

Additional Info : Peak(s) manually integrated

MWD1 C, Sig=210,4 Ref=off (WXXI WXX-15-4-A-Me 2023-12-04 17-37-25.D)

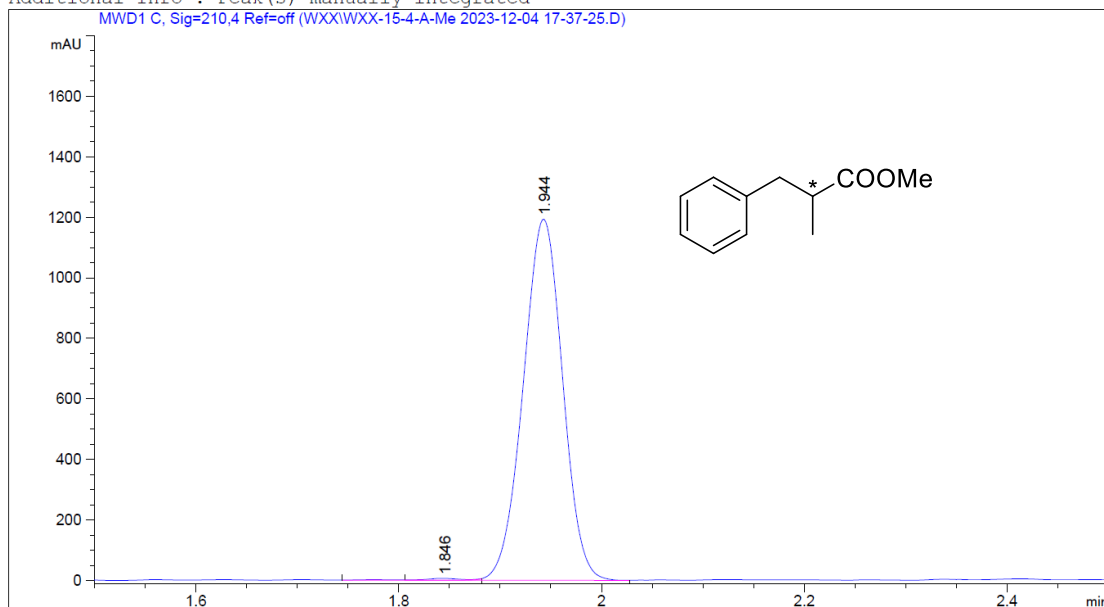

| Peak # | RetTime [min] | Type | Width [min] | Area [mAU*s] | Height [mAU] | Area %  |
|--------|---------------|------|-------------|--------------|--------------|---------|
| 1      | 1.846         | VV E | 0.0362      | 13.87439     | 6.06008      | 0.4284  |
| 2      | 1.944         | VB R | 0.0420      | 3224.60449   | 1193.37988   | 99.5716 |

Totals : 3238.47889 1199.43996

## 8. X-ray crystallographic analysis of compound (S)-2i.

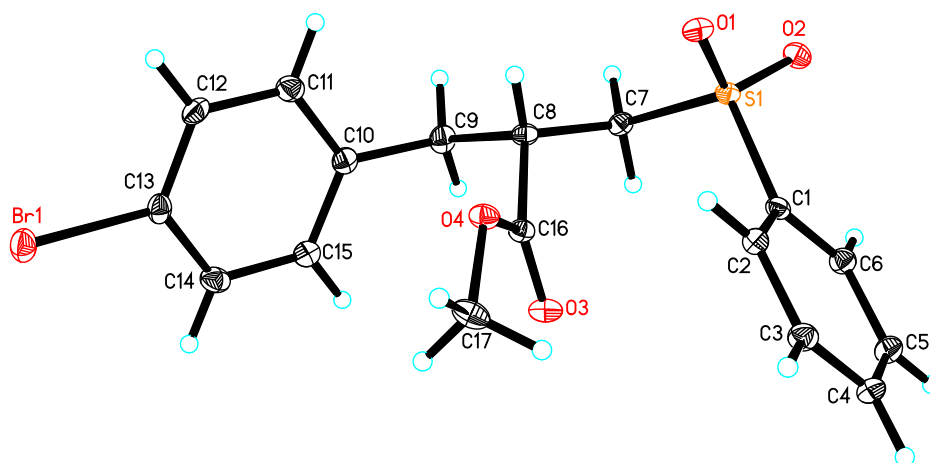

**Table S1. Crystal Data and Experimental Parameters for Compound (S)-2i**

|                                         |                   |                                               |                                                                 |
|-----------------------------------------|-------------------|-----------------------------------------------|-----------------------------------------------------------------|
| CCDC No.                                | 2344449           | Empirical formula                             | C <sub>17</sub> H <sub>17</sub> BrO <sub>4</sub> S              |
| Formula weight                          | 397.27            | Reflections collected                         | 5846                                                            |
| Temperature/K                           | 100.00(10) K      | Crystal system                                | Orthorhombic                                                    |
| Space group                             | P 21 21 21        | <i>a</i> [Å]                                  | 5.43490(10)                                                     |
| <i>b</i> [Å]                            | 12.9371(2)        | <i>c</i> [Å]                                  | 23.6678(4)                                                      |
| <i>α</i> [deg]                          | 90.00             | <i>β</i> [deg]                                | 90.00                                                           |
| <i>γ</i> [deg]                          | 90.00             | Volume/ [Å <sup>3</sup> ]                     | 1664.13(5)                                                      |
| <i>Z</i>                                | 4                 | <i>ρ</i> <sub>calc</sub> (g/cm <sup>3</sup> ) | 1.586                                                           |
| Absorption coefficient/mm <sup>-1</sup> | 4.693             | F(000)                                        | 808                                                             |
| crystal size (mm <sup>3</sup> )         | 0.2 × 0.05 × 0.02 | Radiation                                     | Cu-Kα ( <i>λ</i> = 1.54184)                                     |
| 2θ range for data collection/°          | 7.546 to 150.526  | Index ranges                                  | -6 ≤ <i>h</i> ≤ 6<br>-15 ≤ <i>k</i> ≤ 16<br>-18 ≤ <i>l</i> ≤ 29 |

|                               |                                                                     |                                                |                                   |
|-------------------------------|---------------------------------------------------------------------|------------------------------------------------|-----------------------------------|
| Independent reflections       | 2989 [ $R_{\text{int}} = 0.0369$ ,<br>$R_{\text{sigma}} = 0.0452$ ] | Data/restraints/parameters                     | 2989/0/209                        |
| Goodness-of-fit on $F^2$      | 1.058                                                               | Final R indexes<br>[ $I \geq 2\sigma(I)$ ]     | $R_1 = 0.0295$<br>$wR_2 = 0.0756$ |
| Final R indexes<br>[all data] | $R_1 = 0.0318$<br>$wR_2 = 0.0772$                                   | Largest diff.<br>peak/hole/e $\text{\AA}^{-3}$ | 0.36/-0.47                        |
| Absolute structure parameter  | -0.035(13)                                                          |                                                |                                   |
